# Supplementary material for: Comparative transcriptome analysis revealed omnivorous adaptation of the small intestine of Melinae
Source: Research Square preprint supplement (doi:10.21203/rs.3.rs-598218/v1), 2022-04-14
Supplement: Supplementary file 1 [file 3077e4f4b34b68784d27356b.xlsx]

## Sheet: TableS3
Table S3 Predict and assemble annotated new genes
gene_id	gene_name	gene_chr	gene_start	gene_end	gene_strand	gene_length	gene_biotype	gene_description	gene_tf_family
novel.500	-	scaffold0003	175131235	175133655	-	1897	-	- && - && -	-
novel.501	-	scaffold0003	177204385	177209548	-	1817	-	- && - && -	-
novel.502	-	scaffold0003	177372913	177382962	-	3839	-	- && Q9H8V8.1 RecName: Full=Putative uncharacterized protein FLJ13197 && -	-
novel.503	-	scaffold0003	201041746	201135987	-	5903	-	- && Q8BHM9.1 RecName: Full=Transmembrane protease serine 11F; AltName: Full=Airway trypsin-like protease 4 && PF00089:Trypsin	Trypsin
novel.504	-	scaffold0003	202625214	202632715	-	7502	-	- && P11369.2 RecName: Full=LINE-1 retrotransposable element ORF2 protein; Short=ORF2p; AltName: Full=Long interspersed element-1; Short=L1; AltName: Full=Retrovirus-related Pol polyprotein LINE-1; Includes: RecName: Full=Reverse transcriptase; Includes:	-
novel.505	-	scaffold0003	205270418	205301650	-	239	-	- && - && -	-
novel.506	-	scaffold0003	211025514	211030269	-	250	-	- && - && -	-
novel.507	-	scaffold0003	213572312	213579079	-	2314	-	- && Q96CQ1.1 RecName: Full=Solute carrier family 25 member 36 && -	-
novel.508	-	scaffold0004	64009	67171	+	508	-	- && - && -	-
novel.509	-	scaffold0004	11626798	11627714	+	754	-	- && - && -	-
novel.1418	-	scaffold0010	110219176	110220836	+	524	-	- && - && -	-
novel.1419	-	scaffold0010	119176320	119178462	+	268	-	- && - && -	-
novel.1940	-	scaffold0170	61228	62789	+	1562	-	- && Q9ZZ64.2 RecName: Full=Cytochrome c oxidase subunit 1; AltName: Full=Cytochrome c oxidase polypeptide I >Q1HKA1.1 RecName: Full=Cytochrome c oxidase subunit 1; AltName: Full=Cytochrome c oxidase polypeptide I && PF00115:Cytochrome C and Quinol oxidas	-
novel.1941	-	scaffold0170	21548	62785	-	1474	-	- && P05503.3 RecName: Full=Cytochrome c oxidase subunit 1; AltName: Full=Cytochrome c oxidase polypeptide I && PF00116:Cytochrome C oxidase subunit II, periplasmic domain|PF02790:Cytochrome C oxidase subunit II, transmembrane domain|PF00115:Cytochrome C	-
novel.1410	-	scaffold0010	78126222	78186833	+	401	-	- && - && -	-
novel.1411	-	scaffold0010	80548469	80553139	+	220	-	- && - && -	-
novel.1416	-	scaffold0010	96968521	96986798	+	255	-	- && - && -	-
novel.1417	-	scaffold0010	102765895	102766137	+	243	-	- && - && PF02093:Gag P30 core shell protein	Gag_p30
novel.1414	-	scaffold0010	86429457	86432515	+	576	-	- && - && -	-
novel.1415	-	scaffold0010	91667197	91668161	+	965	-	- && - && -	-
novel.1788	-	scaffold0014	39489001	39615607	+	638	-	- && - && -	-
novel.1789	-	scaffold0014	40296455	40301685	+	516	-	- && - && -	-
novel.1782	-	scaffold0014	31001570	31002233	+	664	-	- && - && -	-
novel.1783	-	scaffold0014	31668462	31687639	+	1998	-	- && - && -	-
novel.1780	-	scaffold0014	29898645	29924939	+	775	-	- && - && -	-
novel.1781	-	scaffold0014	29950497	29967898	+	775	-	- && - && -	-
novel.1786	-	scaffold0014	35014351	35029990	+	717	-	- && - && -	-
novel.1787	-	scaffold0014	37280122	37285687	+	1244	-	- && - && -	-
novel.1784	-	scaffold0014	34677861	34683076	+	574	-	- && - && -	-
novel.1785	-	scaffold0014	34699856	34702787	+	289	-	- && - && -	-
novel.348	-	scaffold0002	59457110	59462558	-	887	-	- && - && -	-
novel.349	-	scaffold0002	70500669	70513057	-	303	-	- && - && -	-
novel.618	-	scaffold0004	103272255	103322866	-	1237	-	- && - && -	-
novel.619	-	scaffold0004	103336192	103341517	-	742	-	- && - && -	-
novel.342	-	scaffold0002	26027794	26028113	-	320	-	- && - && -	-
novel.343	-	scaffold0002	28889876	28890097	-	222	-	- && - && -	-
novel.340	-	scaffold0002	17356157	17373218	-	605	-	- && - && -	-
novel.341	-	scaffold0002	18537120	18544999	-	1243	-	- && - && -	-
novel.346	-	scaffold0002	39972669	39986261	-	1682	-	- && - && -	-
novel.347	-	scaffold0002	42702362	42704520	-	2103	-	- && - && -	-
novel.344	-	scaffold0002	29723870	29786494	-	324	-	- && - && -	-
novel.345	-	scaffold0002	34355345	34371472	-	435	-	- && - && -	-
novel.1412	-	scaffold0010	81074844	81085028	+	3311	-	- && - && -	-
novel.1413	-	scaffold0010	84555933	84568860	+	653	-	- && - && -	-
novel.1942	-	scaffold0316	4541	6025	-	578	-	- && - && -	-
novel.1943	-	scaffold0316	42158	43988	-	1831	-	- && - && -	-
novel.1342	-	scaffold0009	53698666	53710277	-	313	-	- && O00370.1 RecName: Full=LINE-1 retrotransposable element ORF2 protein; Short=ORF2p; Includes: RecName: Full=Reverse transcriptase; Includes: RecName: Full=Endonuclease && -	-
novel.265	-	scaffold0002	86211750	86213037	+	1288	-	- && - && -	-
novel.264	-	scaffold0002	82670667	82671239	+	573	-	- && - && -	-
novel.1343	-	scaffold0009	54394981	54400486	-	969	-	- && - && -	-
novel.267	-	scaffold0002	105668176	105687782	+	252	-	- && - && -	-
novel.266	-	scaffold0002	86553033	86557744	+	1707	-	- && - && -	-
novel.261	-	scaffold0002	76369455	76370650	+	336	-	- && - && -	-
novel.260	-	scaffold0002	75523648	75524362	+	715	-	- && - && -	-
novel.263	-	scaffold0002	82581570	82590903	+	5293	-	- && - && -	-
novel.262	-	scaffold0002	77804392	77847310	+	6971	-	- && Q6P093.3 RecName: Full=Arylacetamide deacetylase-like 2; Flags: Precursor && PF07859:alpha/beta hydrolase fold	Abhydrolase_3
novel.614	-	scaffold0004	86083916	86282720	-	4134	-	- && - && -	-
novel.615	-	scaffold0004	87428344	87450862	-	1976	-	- && - && -	-
novel.616	-	scaffold0004	91662918	91826835	-	229	-	- && - && -	-
novel.617	-	scaffold0004	103078467	103154348	-	428	-	- && - && -	-
novel.610	-	scaffold0004	81957490	81964986	-	226	-	- && - && -	-
novel.611	-	scaffold0004	81978084	81980619	-	2508	-	- && - && -	-
novel.612	-	scaffold0004	82827154	82830793	-	216	-	- && - && -	-
novel.613	-	scaffold0004	83289909	83293787	-	631	-	- && - && -	-
novel.1034	-	scaffold0007	136814331	136822587	+	2636	-	- && - && -	-
novel.1035	-	scaffold0007	148806631	148837694	+	1481	-	- && - && -	-
novel.1777	-	scaffold0014	20832623	20833898	+	314	-	- && - && -	-
novel.1776	-	scaffold0014	15348191	15348885	+	478	-	- && - && -	-
novel.1775	-	scaffold0014	14315281	14332690	+	1169	-	- && - && -	-
novel.1774	-	scaffold0014	14290139	14294493	+	1136	-	- && - && -	-
novel.1773	-	scaffold0014	11717164	11725115	+	320	-	- && - && -	-
novel.1772	-	scaffold0014	11461111	11465188	+	4078	-	- && - && -	-
novel.1771	-	scaffold0014	10000001	10004758	+	1672	-	- && - && -	-
novel.1770	-	scaffold0014	9942133	9952232	+	1307	-	- && - && -	-
novel.1779	-	scaffold0014	29635477	29670321	+	268	-	- && - && -	-
novel.1778	-	scaffold0014	25337871	25356094	+	275	-	- && - && -	-
novel.1571	-	scaffold0011	18892894	18897493	-	242	-	- && - && -	-
novel.1570	-	scaffold0011	18254586	18259828	-	1434	-	- && - && -	-
novel.59	-	scaffold0001	149995496	149998358	+	1336	-	- && - && -	-
novel.58	-	scaffold0001	149974445	149986391	+	4971	-	- && - && -	-
novel.1575	-	scaffold0011	30005313	30009707	-	4395	-	- && - && -	-
novel.1574	-	scaffold0011	28205916	28213573	-	226	-	- && - && -	-
novel.1577	-	scaffold0011	30998138	30999938	-	585	-	- && - && -	-
novel.1576	-	scaffold0011	30223138	30225188	-	1489	-	- && - && -	-
novel.1579	-	scaffold0011	37472208	37496821	-	233	-	- && - && -	-
novel.1578	-	scaffold0011	33705587	33710150	-	4564	-	- && - && -	-
novel.51	-	scaffold0001	144619841	144660539	+	1759	-	- && - && -	-
novel.50	-	scaffold0001	142927199	142943268	+	1104	-	- && - && -	-
novel.57	-	scaffold0001	149911000	149914718	+	2052	-	- && - && -	-
novel.56	-	scaffold0001	149908854	149914726	+	5873	-	- && - && -	-
novel.55	-	scaffold0001	148779345	148780834	+	531	-	- && - && -	-
novel.54	-	scaffold0001	148184995	148190357	+	2090	-	- && Q9CXS4.2 RecName: Full=Centromere protein V; Short=CENP-V; AltName: Full=Proline-rich protein 6 && -	-
novel.1179	-	scaffold0008	13502134	13506217	-	3944	-	- && - && -	-
novel.1178	-	scaffold0008	9076077	9089425	-	1356	-	- && - && -	-
novel.1175	-	scaffold0008	150835194	150837076	+	237	-	- && - && -	-
novel.1174	-	scaffold0008	145617105	145620202	+	259	-	- && - && -	-
novel.1177	-	scaffold0008	2204577	2205827	-	1001	-	- && - && -	-
novel.1176	-	scaffold0008	2081039	2084164	-	2934	-	- && - && -	-
novel.1171	-	scaffold0008	122660707	122706448	+	618	-	- && - && -	-
novel.1170	-	scaffold0008	120828032	120909220	+	273	-	- && - && -	-
novel.1173	-	scaffold0008	145210516	145225629	+	1011	-	- && - && -	-
novel.1172	-	scaffold0008	135710575	135712556	+	1982	-	- && - && -	-
novel.1315	-	scaffold0009	147075567	147076407	+	247	-	- && - && -	-
novel.1314	-	scaffold0009	147072575	147075392	+	2818	-	- && - && -	-
novel.1317	-	scaffold0009	1538447	1540269	-	227	-	- && - && -	-
novel.1316	-	scaffold0009	22324	22569	-	246	-	- && - && -	-
novel.1311	-	scaffold0009	143837070	143843597	+	5569	-	- && - && -	-
novel.1310	-	scaffold0009	143756826	143760286	+	442	-	- && - && -	-
novel.1313	-	scaffold0009	146049667	146052632	+	765	-	- && - && -	-
novel.1312	-	scaffold0009	145532902	145535776	+	1665	-	- && - && -	-
novel.1319	-	scaffold0009	2509388	2509817	-	276	-	- && - && -	-
novel.1318	-	scaffold0009	1962645	1965062	-	1303	-	- && - && -	-
novel.759	-	scaffold0005	198491283	198493309	+	1120	-	- && - && -	-
novel.758	-	scaffold0005	198314558	198319541	+	699	-	- && - && -	-
novel.755	-	scaffold0005	197579544	197579906	+	363	-	- && - && -	-
novel.754	-	scaffold0005	186848566	186849524	+	361	-	- && - && -	-
novel.757	-	scaffold0005	197844396	197852808	+	3477	-	- && - && -	-
novel.756	-	scaffold0005	197579909	197587306	+	739	-	- && - && -	-
novel.751	-	scaffold0005	185101426	185105127	+	873	-	- && - && -	-
novel.750	-	scaffold0005	184306310	184306983	+	674	-	- && - && -	-
novel.753	-	scaffold0005	185960622	185963269	+	748	-	- && - && -	-
novel.752	-	scaffold0005	185125651	185127940	+	303	-	- && - && -	-
novel.1210	-	scaffold0008	62619959	62623465	-	284	-	- && - && -	-
novel.199	-	scaffold0001	250595936	250596982	-	294	-	- && - && -	-
novel.198	-	scaffold0001	244590933	244626294	-	2466	-	- && - && -	-
novel.1211	-	scaffold0008	63552308	63566287	-	899	-	- && - && -	-
novel.193	-	scaffold0001	229203024	229211347	-	1233	-	- && P01003.1 RecName: Full=Ovomucoid && PF00050:Kazal-type serine protease inhibitor domain	-
novel.192	-	scaffold0001	224270170	224273681	-	2487	-	- && - && -	-
novel.191	-	scaffold0001	211330536	211332729	-	1372	-	- && - && -	-
novel.190	-	scaffold0001	210019195	210025783	-	1019	-	- && - && -	-
novel.197	-	scaffold0001	241519125	241529395	-	278	-	- && - && -	-
novel.196	-	scaffold0001	238291169	238323220	-	419	-	- && Q9EQU5.1 RecName: Full=Protein SET; AltName: Full=Phosphatase 2A inhibitor I2PP2A; Short=I-2PP2A; AltName: Full=Template-activating factor I; Short=TAF-I && -	-
novel.195	-	scaffold0001	235655979	235659870	-	1805	-	- && - && -	-
novel.194	-	scaffold0001	235560591	235567307	-	339	-	- && - && -	-
novel.575	-	scaffold0004	196717920	196730352	+	332	-	- && - && -	-
novel.574	-	scaffold0004	196408873	196409830	+	958	-	- && Q14318.2 RecName: Full=Peptidyl-prolyl cis-trans isomerase FKBP8; Short=PPIase FKBP8; AltName: Full=38 kDa FK506-binding protein; Short=38 kDa FKBP; Short=FKBP-38; Short=hFKBP38; AltName: Full=FK506-binding protein 8; Short=FKBP-8; AltName: Full=FKBP	-
novel.577	-	scaffold0004	200301182	200304075	+	474	-	- && - && -	-
novel.576	-	scaffold0004	198513758	198520952	+	267	-	- && - && -	-
novel.571	-	scaffold0004	191153415	191157237	+	2387	-	- && - && -	-
novel.570	-	scaffold0004	188349864	188398296	+	475	-	- && - && -	-
novel.573	-	scaffold0004	192159575	192159882	+	308	-	- && - && -	-
novel.572	-	scaffold0004	191930435	191935254	+	1700	-	- && - && -	-
novel.1214	-	scaffold0008	72094513	72098788	-	520	-	- && Q8N448.1 RecName: Full=Ligand of Numb protein X 2; AltName: Full=Numb-binding protein 2; AltName: Full=PDZ domain-containing RING finger protein 1 && -	-
novel.579	-	scaffold0004	202128632	202134992	+	303	-	- && - && -	-
novel.578	-	scaffold0004	202058528	202063763	+	750	-	- && - && -	-
novel.1215	-	scaffold0008	74738037	75175300	-	4376	-	- && Q03386.1 RecName: Full=Ral guanine nucleotide dissociation stimulator; Short=RalGDS; AltName: Full=Ral guanine nucleotide exchange factor; Short=RalGEF && -	-
novel.1409	-	scaffold0010	71720701	71721219	+	308	-	- && - && -	-
novel.1408	-	scaffold0010	69897555	70134569	+	243	-	- && - && -	-
novel.1216	-	scaffold0008	75076885	75081347	-	603	-	- && O75317.2 RecName: Full=Ubiquitin carboxyl-terminal hydrolase 12; AltName: Full=Deubiquitinating enzyme 12; AltName: Full=Ubiquitin thioesterase 12; AltName: Full=Ubiquitin-hydrolyzing enzyme 1; AltName: Full=Ubiquitin-specific-processing protease 12	UCH
novel.1401	-	scaffold0010	55651062	55653455	+	1592	-	- && - && -	-
novel.1400	-	scaffold0010	52314062	52314592	+	531	-	- && - && -	-
novel.1403	-	scaffold0010	55746320	55749125	+	1947	-	- && - && -	-
novel.1402	-	scaffold0010	55731042	55732655	+	1178	-	- && - && -	-
novel.1405	-	scaffold0010	55765249	55769612	+	629	-	- && - && -	-
novel.1404	-	scaffold0010	55754812	55755859	+	1048	-	- && - && -	-
novel.1407	-	scaffold0010	66560382	66569365	+	5923	-	- && Q4G148.2 RecName: Full=Glucoside xylosyltransferase 1; AltName: Full=Glycosyltransferase 8 domain-containing protein 3 && -	-
novel.1406	-	scaffold0010	57064667	57069098	+	458	-	- && - && -	-
novel.1799	-	scaffold0014	46133596	46136390	+	2520	-	- && - && -	-
novel.1193	-	scaffold0008	39114961	39181644	-	295	-	- && - && -	-
novel.1620	-	scaffold0012	44452673	44460616	+	1542	-	- && - && -	-
novel.1791	-	scaffold0014	43171890	43212644	+	223	-	- && - && -	-
novel.1790	-	scaffold0014	40347289	40352839	+	446	-	- && - && -	-
novel.1793	-	scaffold0014	44270925	44274450	+	400	-	- && - && -	-
novel.1792	-	scaffold0014	43886079	43887305	+	1227	-	- && - && -	-
novel.1795	-	scaffold0014	44461609	44465110	+	339	-	- && - && -	-
novel.1623	-	scaffold0012	47278316	47280510	+	366	-	- && - && -	-
novel.1797	-	scaffold0014	45244676	45246934	+	803	-	- && - && -	-
novel.1796	-	scaffold0014	44798309	44804290	+	624	-	- && - && -	-
novel.1622	-	scaffold0012	46630849	46632820	+	258	-	- && - && -	-
novel.379	-	scaffold0002	153432825	153473161	-	530	-	- && A4IF94.1 RecName: Full=Hippocampus abundant transcript-like protein 1; AltName: Full=Major facilitator superfamily domain-containing 14B && -	-
novel.378	-	scaffold0002	153732514	153774040	-	938	-	- && Q5SR56.3 RecName: Full=Hippocampus abundant transcript-like protein 1; AltName: Full=Major facilitator superfamily domain-containing 14B && -	-
novel.377	-	scaffold0002	153374728	153704916	-	1015	-	- && - && -	-
novel.376	-	scaffold0002	153009757	153023523	-	458	-	- && - && -	-
novel.375	-	scaffold0002	147308102	147314751	-	6650	-	- && - && -	-
novel.374	-	scaffold0002	136935696	136949327	-	1519	-	- && - && -	-
novel.373	-	scaffold0002	134377590	134380915	-	2883	-	- && - && -	-
novel.372	-	scaffold0002	132925563	132952331	-	1566	-	- && P57709.1 RecName: Full=Calcium-transporting ATPase type 2C member 1; Short=ATPase 2C1; AltName: Full=Secretory pathway Ca(2+)-transporting ATPase && -	-
novel.371	-	scaffold0002	129723733	129737508	-	652	-	- && - && -	-
novel.370	-	scaffold0002	129522556	129529656	-	2365	-	- && - && -	-
novel.409	-	scaffold0003	14305189	14307137	+	945	-	- && - && -	-
novel.408	-	scaffold0003	11183228	11186503	+	1143	-	- && - && -	-
novel.1627	-	scaffold0012	71481224	71483693	+	2470	-	- && - && -	-
novel.401	-	scaffold0002	213787842	213789169	-	1328	-	- && - && -	-
novel.400	-	scaffold0002	210914602	210918999	-	1804	-	- && - && -	-
novel.403	-	scaffold0002	216581458	216597072	-	1074	-	- && - && -	-
novel.402	-	scaffold0002	215874590	215886370	-	1682	-	- && - && -	-
novel.405	-	scaffold0002	223276115	223279812	-	2354	-	- && - && -	-
novel.404	-	scaffold0002	222437809	222440388	-	2216	-	- && - && -	-
novel.407	-	scaffold0003	7450127	7452237	+	370	-	- && - && -	-
novel.406	-	scaffold0003	587823	622582	+	357	-	- && - && -	-
novel.386	-	scaffold0002	168473682	168482100	-	7138	-	- && - && -	-
novel.387	-	scaffold0002	169242109	169243707	-	1375	-	- && P11369.2 RecName: Full=LINE-1 retrotransposable element ORF2 protein; Short=ORF2p; AltName: Full=Long interspersed element-1; Short=L1; AltName: Full=Retrovirus-related Pol polyprotein LINE-1; Includes: RecName: Full=Reverse transcriptase; Includes:	-
novel.384	-	scaffold0002	164068792	164071352	-	616	-	- && - && -	-
novel.385	-	scaffold0002	165007288	165012239	-	270	-	- && - && -	-
novel.382	-	scaffold0002	156273325	156275060	-	992	-	- && - && -	-
novel.383	-	scaffold0002	163312690	163314621	-	497	-	- && - && -	-
novel.380	-	scaffold0002	154949940	154952314	-	2375	-	- && - && -	-
novel.381	-	scaffold0002	156272461	156273256	-	796	-	- && - && -	-
novel.993	-	scaffold0007	107688092	107688732	+	370	-	- && Q05474.1 RecName: Full=Ubiquitin-like protein FUBI && -	-
novel.992	-	scaffold0007	107658740	107667525	+	5097	-	- && - && -	-
novel.991	-	scaffold0007	107487894	107490029	+	623	-	- && - && -	-
novel.990	-	scaffold0007	107246935	107264104	+	205	-	- && - && -	-
novel.997	-	scaffold0007	107914193	107924597	+	370	-	- && - && -	-
novel.996	-	scaffold0007	107906415	107910367	+	2218	-	- && O00370.1 RecName: Full=LINE-1 retrotransposable element ORF2 protein; Short=ORF2p; Includes: RecName: Full=Reverse transcriptase; Includes: RecName: Full=Endonuclease && -	-
novel.995	-	scaffold0007	107714186	107721496	+	7311	-	- && Q9UHZ2.1 RecName: Full=Metastasis-associated lung adenocarcinoma transcript 1 && -	-
novel.994	-	scaffold0007	107709941	107710696	+	756	-	- && - && -	-
novel.999	-	scaffold0007	109759507	109762453	+	2947	-	- && - && -	-
novel.998	-	scaffold0007	108567877	108569469	+	803	-	- && - && -	-
novel.979	-	scaffold0007	62246807	62252951	+	5924	-	- && P11369.2 RecName: Full=LINE-1 retrotransposable element ORF2 protein; Short=ORF2p; AltName: Full=Long interspersed element-1; Short=L1; AltName: Full=Retrovirus-related Pol polyprotein LINE-1; Includes: RecName: Full=Reverse transcriptase; Includes:	-
novel.978	-	scaffold0007	57118248	57125159	+	5972	-	- && - && -	-
novel.971	-	scaffold0007	37182886	37204885	+	646	-	- && - && -	-
novel.970	-	scaffold0007	37013180	37018149	+	2045	-	- && - && -	-
novel.973	-	scaffold0007	44543714	44544574	+	227	-	- && - && -	-
novel.972	-	scaffold0007	38863264	38873217	+	533	-	- && - && -	-
novel.975	-	scaffold0007	51646076	51701405	+	472	-	- && - && -	-
novel.974	-	scaffold0007	48071872	48072297	+	274	-	- && - && -	-
novel.977	-	scaffold0007	53355382	53364598	+	4249	-	- && P61563.1 RecName: Full=Syncytin-1; AltName: Full=ERV-W1 provirus ancestral Env polyprotein; AltName: Full=ERVWE1 envelope protein; AltName: Full=Endogenous retrovirus group W member 1; AltName: Full=Envelope polyprotein; AltName: Full=Syncytin; Conta	rve
novel.976	-	scaffold0007	51656602	51839040	+	818	-	- && - && -	-
novel.1096	-	scaffold0007	129466165	129513123	-	5038	-	- && Q13398.2 RecName: Full=Zinc finger protein 211; AltName: Full=Zinc finger protein C2H2-25 && PF00096:Zinc finger, C2H2 type|PF01352:KRAB box|PF13465:Zinc-finger double domain	KRAB
novel.1097	-	scaffold0007	129484849	129489764	-	1504	-	- && - && -	-
novel.1094	-	scaffold0007	127870829	127875914	-	1890	-	- && - && -	-
novel.1095	-	scaffold0007	129403719	129408844	-	1061	-	- && - && -	-
novel.1092	-	scaffold0007	126587220	126588116	-	723	-	- && - && -	-
novel.1093	-	scaffold0007	127541548	127545609	-	3086	-	- && - && -	-
novel.1542	-	scaffold0011	120164396	120166212	+	1503	-	- && - && -	-
novel.1543	-	scaffold0011	120210634	120220250	+	289	-	- && - && -	-
novel.66	-	scaffold0001	176823372	176824478	+	302	-	- && - && -	-
novel.67	-	scaffold0001	176841038	176842582	+	333	-	- && - && -	-
novel.64	-	scaffold0001	164509612	164514895	+	1865	-	- && Q62293.1 RecName: Full=T-cell-specific guanine nucleotide triphosphate-binding protein 1; AltName: Full=Interferon-gamma-inducible GTPase Ifggb5 >Q3T9E4.2 RecName: Full=T-cell-specific guanine nucleotide triphosphate-binding protein 2; AltName: Full=	IIGP
novel.65	-	scaffold0001	170248145	170249007	+	863	-	- && - && -	-
novel.62	-	scaffold0001	163712058	163721034	+	1019	-	- && O00370.1 RecName: Full=LINE-1 retrotransposable element ORF2 protein; Short=ORF2p; Includes: RecName: Full=Reverse transcriptase; Includes: RecName: Full=Endonuclease && -	-
novel.63	-	scaffold0001	164440738	164459055	+	692	-	- && - && -	-
novel.60	-	scaffold0001	150529617	150532023	+	1109	-	- && - && -	-
novel.61	-	scaffold0001	151475614	151484040	+	1172	-	- && P31789.1 RecName: Full=Envelope glycoprotein; AltName: Full=Env polyprotein; Contains: RecName: Full=Surface protein; Short=SU; Contains: RecName: Full=Transmembrane protein; Short=TM; Flags: Precursor [Mouse Intracisternal A-particle] && PF00517:Ret	-
novel.1360	-	scaffold0009	103360423	103361385	-	551	-	- && - && -	-
novel.1140	-	scaffold0008	36507630	36513289	+	2187	-	- && - && -	-
novel.1141	-	scaffold0008	42688772	42694473	+	2025	-	- && - && -	-
novel.1142	-	scaffold0008	43227931	43235500	+	4655	-	- && - && -	-
novel.1143	-	scaffold0008	44064564	44066106	+	1381	-	- && - && -	-
novel.1144	-	scaffold0008	44375862	44382102	+	463	-	- && - && -	-
novel.1145	-	scaffold0008	45198486	45200326	+	1348	-	- && - && -	-
novel.1146	-	scaffold0008	46138747	46141581	+	2835	-	- && - && -	-
novel.1147	-	scaffold0008	47070702	47078269	+	7491	-	- && - && -	-
novel.1148	-	scaffold0008	50104081	50105487	+	649	-	- && - && -	-
novel.1149	-	scaffold0008	51277672	51279283	+	1612	-	- && - && -	-
novel.1328	-	scaffold0009	26509648	26557007	-	371	-	- && Q04671.2 RecName: Full=P protein; AltName: Full=Melanocyte-specific transporter protein; AltName: Full=Pink-eyed dilution protein homolog && -	-
novel.1329	-	scaffold0009	30553030	30553724	-	255	-	- && - && -	-
novel.1898	-	scaffold0015	1922090	1923823	-	308	-	- && - && -	-
novel.1899	-	scaffold0015	2151951	2153025	-	468	-	- && - && -	-
novel.1320	-	scaffold0009	2543056	2545339	-	855	-	- && - && -	-
novel.1321	-	scaffold0009	4561912	4563755	-	1138	-	- && - && -	-
novel.1322	-	scaffold0009	5688685	5694861	-	4433	-	- && - && -	-
novel.1323	-	scaffold0009	9134765	9143682	-	346	-	- && - && -	-
novel.1324	-	scaffold0009	11309175	11316318	-	343	-	- && - && -	-
novel.1325	-	scaffold0009	13510966	13532656	-	341	-	- && - && -	-
novel.1326	-	scaffold0009	14803039	14805556	-	294	-	- && - && -	-
novel.1327	-	scaffold0009	18031222	18039271	-	1822	-	- && - && -	-
novel.748	-	scaffold0005	177347997	177349342	+	1346	-	- && - && -	-
novel.749	-	scaffold0005	179049692	179052306	+	218	-	- && - && -	-
novel.746	-	scaffold0005	172206691	172214961	+	2028	-	- && - && -	-
novel.747	-	scaffold0005	172269898	172294648	+	3401	-	- && - && -	-
novel.744	-	scaffold0005	158719865	158720836	+	266	-	- && - && -	-
novel.745	-	scaffold0005	161723047	161725850	+	427	-	- && - && -	-
novel.742	-	scaffold0005	157451906	157455632	+	1546	-	- && - && -	-
novel.743	-	scaffold0005	158483932	158484565	+	233	-	- && - && -	-
novel.740	-	scaffold0005	148183060	148184321	+	426	-	- && - && -	-
novel.741	-	scaffold0005	152801994	152803671	+	267	-	- && - && -	-
novel.188	-	scaffold0001	201670615	201671548	-	698	-	- && - && -	-
novel.189	-	scaffold0001	206865953	206871541	-	5589	-	- && O00370.1 RecName: Full=LINE-1 retrotransposable element ORF2 protein; Short=ORF2p; Includes: RecName: Full=Reverse transcriptase; Includes: RecName: Full=Endonuclease && -	-
novel.184	-	scaffold0001	179747287	179759034	-	287	-	- && Q9CYC6.2 RecName: Full=m7GpppN-mRNA hydrolase; AltName: Full=mRNA-decapping enzyme 2 && -	-
novel.185	-	scaffold0001	180501343	180502972	-	810	-	- && - && -	-
novel.186	-	scaffold0001	192263433	192264970	-	1186	-	- && - && -	-
novel.187	-	scaffold0001	200804006	201120188	-	728	-	- && - && -	-
novel.180	-	scaffold0001	164352348	164362294	-	5642	-	- && P11369.2 RecName: Full=LINE-1 retrotransposable element ORF2 protein; Short=ORF2p; AltName: Full=Long interspersed element-1; Short=L1; AltName: Full=Retrovirus-related Pol polyprotein LINE-1; Includes: RecName: Full=Reverse transcriptase; Includes:	-
novel.181	-	scaffold0001	169206518	169241633	-	355	-	- && - && -	-
novel.182	-	scaffold0001	170697731	170706060	-	1132	-	- && - && -	-
novel.183	-	scaffold0001	175277834	175284182	-	1173	-	- && - && -	-
novel.566	-	scaffold0004	177887987	177896685	+	345	-	- && - && -	-
novel.567	-	scaffold0004	179957531	179969395	+	495	-	- && - && -	-
novel.564	-	scaffold0004	175133174	175136230	+	1862	-	- && - && -	-
novel.565	-	scaffold0004	175494319	175495812	+	1420	-	- && - && -	-
novel.562	-	scaffold0004	171198368	171199966	+	1599	-	- && - && -	-
novel.563	-	scaffold0004	171815256	171822424	+	4596	-	- && - && -	-
novel.560	-	scaffold0004	154572648	154605087	+	378	-	- && - && -	-
novel.561	-	scaffold0004	161521785	161525796	+	1151	-	- && - && -	-
novel.568	-	scaffold0004	185819946	185821710	+	1765	-	- && - && -	-
novel.569	-	scaffold0004	188235257	188308571	+	202	-	- && - && -	-
novel.1438	-	scaffold0010	4097112	4104978	-	227	-	- && - && -	-
novel.1439	-	scaffold0010	7360045	7368807	-	617	-	- && - && -	-
novel.1434	-	scaffold0010	145082175	145086441	+	1930	-	- && - && -	-
novel.1435	-	scaffold0010	145431935	145438231	+	3623	-	- && P08548.1 RecName: Full=LINE-1 reverse transcriptase homolog && -	-
novel.1436	-	scaffold0010	103936	110659	-	801	-	- && - && -	-
novel.1437	-	scaffold0010	3071126	3072449	-	1324	-	- && - && -	-
novel.1430	-	scaffold0010	141558914	141567793	+	1443	-	- && - && -	-
novel.1431	-	scaffold0010	142122405	142125744	+	3340	-	- && - && -	-
novel.1432	-	scaffold0010	142502534	142503140	+	505	-	- && - && -	-
novel.1433	-	scaffold0010	142994944	142997129	+	260	-	- && - && -	-
novel.360	-	scaffold0002	82355166	82363107	-	2222	-	- && - && -	-
novel.361	-	scaffold0002	82716376	82767962	-	1080	-	- && - && -	-
novel.362	-	scaffold0002	83175162	83178171	-	331	-	- && - && -	-
novel.363	-	scaffold0002	86548708	86553352	-	691	-	- && - && -	-
novel.364	-	scaffold0002	110446134	110458337	-	230	-	- && - && -	-
novel.365	-	scaffold0002	110776967	110794484	-	2274	-	- && - && -	-
novel.366	-	scaffold0002	111466317	111481177	-	14771	-	- && - && -	-
novel.367	-	scaffold0002	111746219	111747786	-	423	-	- && - && -	-
novel.368	-	scaffold0002	116105049	116113572	-	2493	-	- && - && -	-
novel.369	-	scaffold0002	116161302	116162474	-	233	-	- && - && -	-
novel.418	-	scaffold0003	42950285	42956513	+	1663	-	- && - && -	-
novel.419	-	scaffold0003	43007996	43069157	+	657	-	- && - && -	-
novel.412	-	scaffold0003	24349830	24351026	+	448	-	- && - && -	-
novel.413	-	scaffold0003	25464181	25469831	+	302	-	- && - && -	-
novel.410	-	scaffold0003	17597437	17601486	+	612	-	- && - && -	-
novel.411	-	scaffold0003	24119115	24120499	+	257	-	- && - && -	-
novel.416	-	scaffold0003	41434800	41451729	+	2304	-	- && - && -	-
novel.417	-	scaffold0003	41726872	41727659	+	256	-	- && - && -	-
novel.414	-	scaffold0003	27649465	27654561	+	305	-	- && - && -	-
novel.415	-	scaffold0003	40282394	40293086	+	1965	-	- && - && -	-
novel.984	-	scaffold0007	97926075	97970605	+	207	-	- && - && -	-
novel.985	-	scaffold0007	97973098	97976131	+	286	-	- && - && -	-
novel.986	-	scaffold0007	103409604	103416718	+	560	-	- && - && -	-
novel.987	-	scaffold0007	105157619	105161095	+	420	-	- && A0JNP2.2 RecName: Full=Secretoglobin family 1D member; Short=LppAB; Flags: Precursor && -	-
novel.980	-	scaffold0007	65856952	65869058	+	395	-	- && - && -	-
novel.981	-	scaffold0007	66248360	66249796	+	1326	-	- && - && -	-
novel.982	-	scaffold0007	76245272	76265339	+	422	-	- && - && -	-
novel.983	-	scaffold0007	94301608	94304051	+	1262	-	- && - && -	-
novel.988	-	scaffold0007	105279232	105281468	+	480	-	- && Q13296.1 RecName: Full=Mammaglobin-A; AltName: Full=Mammaglobin-1; AltName: Full=Secretoglobin family 2A member 2; Flags: Precursor && -	-
novel.989	-	scaffold0007	106439301	106441295	+	1995	-	- && - && -	-
novel.527	-	scaffold0004	46096406	46100728	+	320	-	- && - && -	-
novel.1650	-	scaffold0012	29800857	29810663	-	458	-	- && - && -	-
novel.1123	-	scaffold0007	176691248	176693035	-	1636	-	- && - && -	-
novel.1120	-	scaffold0007	173469873	173470645	-	652	-	- && - && -	-
novel.1121	-	scaffold0007	176017246	176019713	-	2207	-	- && - && -	-
novel.1126	-	scaffold0008	6941847	6950041	+	389	-	- && - && -	-
novel.1127	-	scaffold0008	7386777	7387936	+	947	-	- && - && -	-
novel.1124	-	scaffold0008	2344521	2352968	+	227	-	- && - && -	-
novel.1125	-	scaffold0008	4679166	4681470	+	1652	-	- && - && -	-
novel.71	-	scaffold0001	193837948	193856122	+	671	-	- && - && -	-
novel.968	-	scaffold0007	21980304	21983340	+	1278	-	- && - && -	-
novel.969	-	scaffold0007	27399456	27399707	+	252	-	- && - && -	-
novel.1084	-	scaffold0007	113888113	113890064	-	1952	-	- && - && -	-
novel.962	-	scaffold0007	7510998	7511281	+	284	-	- && - && -	-
novel.963	-	scaffold0007	8083508	8089705	+	3396	-	- && - && -	-
novel.960	-	scaffold0007	3963819	3964430	+	276	-	- && - && -	-
novel.961	-	scaffold0007	4133894	4139953	+	1352	-	- && Q9P1U0.1 RecName: Full=DNA-directed RNA polymerase I subunit RPA12; AltName: Full=Zinc ribbon domain-containing protein 1 >Q1XHV8.1 RecName: Full=DNA-directed RNA polymerase I subunit RPA12; AltName: Full=Zinc ribbon domain-containing protein 1 && PF	-
novel.966	-	scaffold0007	13925247	13928675	+	2050	-	- && - && -	-
novel.967	-	scaffold0007	16351385	16355090	+	2449	-	- && - && -	-
novel.964	-	scaffold0007	11345162	11345942	+	579	-	- && - && -	-
novel.965	-	scaffold0007	11931000	11946016	+	266	-	- && - && -	-
novel.1086	-	scaffold0007	117064230	117064654	-	425	-	- && - && -	-
novel.589	-	scaffold0004	26674660	26677731	-	489	-	- && - && -	-
novel.75	-	scaffold0001	204082601	204089868	+	7268	-	- && A1Z651.1 RecName: Full=Gag-Pol polyprotein; Short=Pr180gag-pol; Contains: RecName: Full=Matrix protein p15; Short=MA; Contains: RecName: Full=RNA-binding phosphoprotein p12; AltName: Full=pp12; Contains: RecName: Full=Capsid protein p30; Short=CA; Co	Gag_p30
novel.74	-	scaffold0001	198992959	199004102	+	1560	-	- && - && -	-
novel.77	-	scaffold0001	211311379	211313601	+	1322	-	- && P31789.1 RecName: Full=Envelope glycoprotein; AltName: Full=Env polyprotein; Contains: RecName: Full=Surface protein; Short=SU; Contains: RecName: Full=Transmembrane protein; Short=TM; Flags: Precursor [Mouse Intracisternal A-particle] && PF00517:Ret	-
novel.76	-	scaffold0001	210157613	210161678	+	954	-	- && - && -	-
novel.1559	-	scaffold0011	8093351	8102716	-	256	-	- && - && -	-
novel.1558	-	scaffold0011	8058436	8061080	-	256	-	- && - && -	-
novel.1553	-	scaffold0011	140393320	140395416	+	2097	-	- && - && -	-
novel.1552	-	scaffold0011	140044702	140047655	+	2164	-	- && - && -	-
novel.1551	-	scaffold0011	138394420	138430189	+	433	-	- && - && -	-
novel.1550	-	scaffold0011	138093322	138095866	+	472	-	- && - && -	-
novel.1557	-	scaffold0011	8029524	8030351	-	384	-	- && - && -	-
novel.1556	-	scaffold0011	5805710	5821116	-	463	-	- && - && -	-
novel.1555	-	scaffold0011	3891033	3897145	-	1270	-	- && - && -	-
novel.1554	-	scaffold0011	1333898	1335945	-	510	-	- && - && -	-
novel.1085	-	scaffold0007	114009364	114010911	-	1460	-	- && - && -	-
novel.70	-	scaffold0001	181073305	181076779	+	3475	-	- && - && -	-
novel.73	-	scaffold0001	196787014	196793279	+	6085	-	- && Q8WUF8.1 RecName: Full=Protein FAM172A; Flags: Precursor && -	-
novel.72	-	scaffold0001	194104665	194106721	+	591	-	- && - && -	-
novel.1081	-	scaffold0007	111254909	111257448	-	1548	-	- && - && -	-
novel.1080	-	scaffold0007	108756772	108759413	-	2642	-	- && - && -	-
novel.1083	-	scaffold0007	113086264	113087970	-	1707	-	- && - && -	-
novel.1082	-	scaffold0007	113005282	113008483	-	657	-	- && - && -	-
novel.79	-	scaffold0001	220380803	220382047	+	315	-	- && - && -	-
novel.78	-	scaffold0001	220332776	220337883	+	336	-	- && - && -	-
novel.1089	-	scaffold0007	122057035	122072086	-	2256	-	- && - && -	-
novel.1088	-	scaffold0007	120149908	120150291	-	384	-	- && - && -	-
novel.232	-	scaffold0002	2794215	2794962	+	748	-	- && - && -	-
novel.1157	-	scaffold0008	71902781	71939906	+	996	-	- && - && -	-
novel.1156	-	scaffold0008	70874662	70880962	+	463	-	- && - && -	-
novel.1155	-	scaffold0008	64637024	64696372	+	4886	-	- && Q8TGM7.1 RecName: Full=Putative uncharacterized protein ART2; AltName: Full=Antisense to ribosomal RNA transcript protein 2 && -	-
novel.1154	-	scaffold0008	57537527	57540445	+	1060	-	- && - && -	-
novel.1153	-	scaffold0008	55196829	55198558	+	323	-	- && - && -	-
novel.1152	-	scaffold0008	53266452	53267511	+	804	-	- && - && -	-
novel.1151	-	scaffold0008	51869920	51871799	+	1514	-	- && - && -	-
novel.1150	-	scaffold0008	51290291	51293382	+	1312	-	- && - && -	-
novel.1159	-	scaffold0008	75324358	75551505	+	11571	-	- && Q5M981.2 RecName: Full=Ubiquitin carboxyl-terminal hydrolase 12-B; AltName: Full=Deubiquitinating enzyme 12-B; AltName: Full=Ubiquitin thioesterase 12-B; AltName: Full=Ubiquitin-specific-processing protease 12-B && -	-
novel.1158	-	scaffold0008	74812480	74920254	+	3137	-	- && Q5M981.2 RecName: Full=Ubiquitin carboxyl-terminal hydrolase 12-B; AltName: Full=Deubiquitinating enzyme 12-B; AltName: Full=Ubiquitin thioesterase 12-B; AltName: Full=Ubiquitin-specific-processing protease 12-B && PF00443:Ubiquitin carboxyl-terminal	UCH
novel.1889	-	scaffold0015	40411720	40419711	+	3448	-	- && - && -	-
novel.1888	-	scaffold0015	40411170	40414575	+	541	-	- && - && -	-
novel.1339	-	scaffold0009	49434156	49440816	-	1153	-	- && - && -	-
novel.1338	-	scaffold0009	49139563	49143023	-	266	-	- && - && -	-
novel.1337	-	scaffold0009	48107019	48108117	-	306	-	- && - && -	-
novel.1336	-	scaffold0009	43657196	43657487	-	292	-	- && - && -	-
novel.1335	-	scaffold0009	41393849	41395444	-	1253	-	- && - && -	-
novel.1334	-	scaffold0009	40578902	40584856	-	5955	-	- && - && -	-
novel.1333	-	scaffold0009	38982592	38995540	-	304	-	- && - && -	-
novel.1332	-	scaffold0009	34815372	34832716	-	4238	-	- && - && -	-
novel.1331	-	scaffold0009	34239009	34269105	-	5040	-	- && - && -	-
novel.1330	-	scaffold0009	32801762	32814416	-	1283	-	- && - && -	-
novel.773	-	scaffold0005	23616074	23619681	-	305	-	- && - && -	-
novel.772	-	scaffold0005	19745907	19746481	-	575	-	- && - && -	-
novel.771	-	scaffold0005	15671978	15672717	-	416	-	- && - && -	-
novel.770	-	scaffold0005	15421996	15427786	-	4163	-	- && - && -	-
novel.777	-	scaffold0005	35684034	35707187	-	583	-	- && - && -	-
novel.776	-	scaffold0005	31077033	31077866	-	559	-	- && - && -	-
novel.775	-	scaffold0005	28972545	28977916	-	834	-	- && - && -	-
novel.774	-	scaffold0005	28605885	28607403	-	495	-	- && - && -	-
novel.779	-	scaffold0005	36410554	36414356	-	443	-	- && - && -	-
novel.778	-	scaffold0005	35721942	35765344	-	6617	-	- && O00370.1 RecName: Full=LINE-1 retrotransposable element ORF2 protein; Short=ORF2p; Includes: RecName: Full=Reverse transcriptase; Includes: RecName: Full=Endonuclease && -	-
novel.171	-	scaffold0001	148654094	148654548	-	239	-	- && - && -	-
novel.170	-	scaffold0001	148575463	148577167	-	1705	-	- && - && -	-
novel.173	-	scaffold0001	149887634	149889839	-	757	-	- && - && -	-
novel.172	-	scaffold0001	149743642	149775621	-	6555	-	- && - && -	-
novel.175	-	scaffold0001	150410215	150411896	-	1682	-	- && P21436.1 RecName: Full=Envelope glycoprotein; AltName: Full=Env polyprotein; Contains: RecName: Full=Surface protein; Short=SU; AltName: Full=Glycoprotein 76; Short=gp76; Contains: RecName: Full=Transmembrane protein; Short=TM; AltName: Full=Envelope	-
novel.174	-	scaffold0001	149972908	149975635	-	1658	-	- && - && -	-
novel.177	-	scaffold0001	150536817	150538111	-	512	-	- && - && -	-
novel.176	-	scaffold0001	150516664	150520813	-	2002	-	- && - && -	-
novel.179	-	scaffold0001	163990475	163992999	-	1195	-	- && - && -	-
novel.178	-	scaffold0001	158446145	158461969	-	203	-	- && P11369.2 RecName: Full=LINE-1 retrotransposable element ORF2 protein; Short=ORF2p; AltName: Full=Long interspersed element-1; Short=L1; AltName: Full=Retrovirus-related Pol polyprotein LINE-1; Includes: RecName: Full=Reverse transcriptase; Includes:	-
novel.799	-	scaffold0005	106332183	106332674	-	492	-	- && - && -	-
novel.798	-	scaffold0005	106007853	106009857	-	353	-	- && - && -	-
novel.791	-	scaffold0005	90289440	90290105	-	527	-	- && - && -	-
novel.790	-	scaffold0005	89068729	89071279	-	877	-	- && - && -	-
novel.793	-	scaffold0005	92692043	92695627	-	231	-	- && - && -	-
novel.792	-	scaffold0005	92289952	92294380	-	2709	-	- && - && -	-
novel.795	-	scaffold0005	102455816	102459052	-	2136	-	- && - && -	-
novel.794	-	scaffold0005	95608402	95609561	-	1160	-	- && - && -	-
novel.797	-	scaffold0005	104695418	104695893	-	217	-	- && - && -	-
novel.796	-	scaffold0005	103661971	103664346	-	205	-	- && - && -	-
novel.1423	-	scaffold0010	133362706	133363506	+	279	-	- && - && -	-
novel.1422	-	scaffold0010	126507051	126512662	+	4159	-	- && - && -	-
novel.1421	-	scaffold0010	126022348	126022728	+	270	-	- && - && -	-
novel.1420	-	scaffold0010	122866852	122867208	+	227	-	- && - && -	-
novel.1427	-	scaffold0010	137954179	137955941	+	1763	-	- && - && -	-
novel.1426	-	scaffold0010	136551587	136553613	+	2027	-	- && P03385.1 RecName: Full=Envelope glycoprotein; Short=Pr80env; AltName: Full=Env polyprotein; Contains: RecName: Full=Surface protein; Short=SU; AltName: Full=Glycoprotein 70; Short=gp70; Contains: RecName: Full=Transmembrane protein; Short=TM; AltName	-
novel.1425	-	scaffold0010	136334665	136337448	+	2703	-	- && - && -	-
novel.1424	-	scaffold0010	135515600	135531014	+	567	-	- && - && -	-
novel.1429	-	scaffold0010	141046632	141046994	+	363	-	- && - && -	-
novel.1428	-	scaffold0010	138026363	138041976	+	284	-	- && - && -	-
novel.315	-	scaffold0002	221636841	221640632	+	2517	-	- && - && -	-
novel.314	-	scaffold0002	221388782	221392523	+	2587	-	- && - && -	-
novel.317	-	scaffold0002	222796028	222820282	+	1366	-	- && - && -	-
novel.316	-	scaffold0002	222655255	222657642	+	2068	-	- && - && -	-
novel.311	-	scaffold0002	218005835	218017801	+	3894	-	- && - && -	-
novel.310	-	scaffold0002	214945297	214948684	+	2416	-	- && Q5REI6.1 RecName: Full=Zinc finger protein 791 && PF01352:KRAB box	KRAB
novel.313	-	scaffold0002	221055706	221061848	+	5771	-	- && - && -	-
novel.312	-	scaffold0002	220702443	220708546	+	2400	-	- && - && -	-
novel.319	-	scaffold0002	223166871	223168184	+	1056	-	- && - && -	-
novel.318	-	scaffold0002	223119895	223121549	+	1157	-	- && - && -	-
novel.429	-	scaffold0003	87900388	87900643	+	256	-	- && - && -	-
novel.428	-	scaffold0003	72853368	72856099	+	2732	-	- && - && -	-
novel.427	-	scaffold0003	68118136	68147189	+	228	-	- && - && -	-
novel.426	-	scaffold0003	52805378	52810860	+	1514	-	- && - && -	-
novel.425	-	scaffold0003	51785649	51794197	+	1325	-	- && - && -	-
novel.424	-	scaffold0003	50298274	50324847	+	902	-	- && - && -	-
novel.423	-	scaffold0003	50144628	50154654	+	694	-	- && - && -	-
novel.422	-	scaffold0003	49792586	49818746	+	3196	-	- && P21415.2 RecName: Full=Envelope glycoprotein; AltName: Full=Env polyprotein; Contains: RecName: Full=Surface protein; Short=SU; AltName: Full=Glycoprotein 70; Short=gp70; Contains: RecName: Full=Transmembrane protein; Short=TM; AltName: Full=Envelope	-
novel.421	-	scaffold0003	44841168	44841558	+	391	-	- && - && -	-
novel.420	-	scaffold0003	44242628	44265560	+	1074	-	- && - && -	-
novel.229	-	scaffold0002	2543822	2544756	+	430	-	- && - && -	-
novel.228	-	scaffold0002	2324314	2326310	+	1698	-	- && - && -	-
novel.559	-	scaffold0004	153576473	153580318	+	355	-	- && - && -	-
novel.558	-	scaffold0004	145018840	145031404	+	1151	-	- && - && -	-
novel.1884	-	scaffold0015	39956041	39961479	+	4722	-	- && - && -	-
novel.221	-	scaffold0001	312942308	312954742	-	3102	-	- && - && -	-
novel.220	-	scaffold0001	312500014	312506785	-	4564	-	- && - && -	-
novel.551	-	scaffold0004	122736885	122740134	+	286	-	- && - && -	-
novel.222	-	scaffold0002	1228833	1229968	+	449	-	- && - && -	-
novel.557	-	scaffold0004	144402973	144408185	+	327	-	- && - && -	-
novel.224	-	scaffold0002	1400482	1407690	+	250	-	- && - && -	-
novel.227	-	scaffold0002	2093377	2095317	+	1941	-	- && - && -	-
novel.226	-	scaffold0002	2045613	2061201	+	6593	-	- && - && -	-
novel.1886	-	scaffold0015	40127527	40127901	+	375	-	- && - && -	-
novel.1881	-	scaffold0015	35590164	35592771	+	343	-	- && - && -	-
novel.1880	-	scaffold0015	33497968	33500665	+	1079	-	- && - && -	-
novel.1883	-	scaffold0015	39899073	39902481	+	1696	-	- && - && -	-
novel.1882	-	scaffold0015	35845621	35847682	+	387	-	- && - && -	-
novel.1236	-	scaffold0008	120300226	120301373	-	319	-	- && - && -	-
novel.1237	-	scaffold0008	120482234	120483666	-	1411	-	- && - && -	-
novel.1234	-	scaffold0008	115944832	115960988	-	611	-	- && - && -	-
novel.1235	-	scaffold0008	119281908	119286048	-	2023	-	- && - && -	-
novel.1232	-	scaffold0008	98851726	98856965	-	466	-	- && - && -	-
novel.1233	-	scaffold0008	104493439	104499040	-	305	-	- && - && -	-
novel.1230	-	scaffold0008	97743189	97745769	-	283	-	- && - && -	-
novel.1231	-	scaffold0008	98083911	98085385	-	760	-	- && - && -	-
novel.889	-	scaffold0006	194684927	194692614	+	7688	-	- && - && -	-
novel.888	-	scaffold0006	192143560	192154851	+	1950	-	- && P11369.2 RecName: Full=LINE-1 retrotransposable element ORF2 protein; Short=ORF2p; AltName: Full=Long interspersed element-1; Short=L1; AltName: Full=Retrovirus-related Pol polyprotein LINE-1; Includes: RecName: Full=Reverse transcriptase; Includes:	-
novel.885	-	scaffold0006	183729407	183731236	+	207	-	- && - && -	-
novel.884	-	scaffold0006	183100170	183100633	+	365	-	- && P04213.1 RecName: Full=T-cell receptor beta chain V region C5; Flags: Precursor && -	-
novel.887	-	scaffold0006	189397920	189399377	+	1230	-	- && - && -	-
novel.886	-	scaffold0006	188982362	188986550	+	2475	-	- && P31789.1 RecName: Full=Envelope glycoprotein; AltName: Full=Env polyprotein; Contains: RecName: Full=Surface protein; Short=SU; Contains: RecName: Full=Transmembrane protein; Short=TM; Flags: Precursor [Mouse Intracisternal A-particle] && PF00517:Ret	-
novel.881	-	scaffold0006	181233685	181236197	+	1635	-	- && - && -	-
novel.880	-	scaffold0006	177538922	177545887	+	970	-	- && - && -	-
novel.883	-	scaffold0006	183095364	183096118	+	657	-	- && P11364.1 RecName: Full=Viral T-cell receptor beta chain-like T17T-22; Flags: Precursor && -	-
novel.882	-	scaffold0006	182927978	182928672	+	431	-	- && P04214.1 RecName: Full=T-cell receptor beta chain V region E1; Flags: Precursor && -	-
novel.1626	-	scaffold0012	68411391	68444005	+	25593	-	- && - && -	-
novel.959	-	scaffold0007	2984529	2985602	+	654	-	- && - && -	-
novel.958	-	scaffold0007	2953771	2956453	+	276	-	- && - && -	-
novel.957	-	scaffold0006	190479313	190487025	-	1604	-	- && - && -	-
novel.956	-	scaffold0006	190426612	190427230	-	357	-	- && - && -	-
novel.955	-	scaffold0006	190366413	190378116	-	2241	-	- && - && -	-
novel.954	-	scaffold0006	190068542	190069376	-	337	-	- && - && -	-
novel.953	-	scaffold0006	189650039	189650484	-	323	-	- && - && -	-
novel.952	-	scaffold0006	188281418	188287054	-	2358	-	- && - && -	-
novel.951	-	scaffold0006	188012415	188019593	-	1024	-	- && - && -	-
novel.950	-	scaffold0006	183666268	183667372	-	1105	-	- && - && -	-
novel.1528	-	scaffold0011	103298738	103301030	+	889	-	- && - && -	-
novel.1529	-	scaffold0011	103361406	103395931	+	359	-	- && - && -	-
novel.1526	-	scaffold0011	89528981	89533895	+	373	-	- && - && -	-
novel.1527	-	scaffold0011	91970218	91970760	+	350	-	- && - && -	-
novel.1524	-	scaffold0011	70040201	70062981	+	320	-	- && - && -	-
novel.1525	-	scaffold0011	86721830	86755245	+	1242	-	- && - && -	-
novel.1522	-	scaffold0011	69311546	69371223	+	1116	-	- && - && -	-
novel.1523	-	scaffold0011	69517328	69518504	+	1150	-	- && - && -	-
novel.1520	-	scaffold0011	66912210	66913827	+	293	-	- && - && -	-
novel.1521	-	scaffold0011	66954323	66957520	+	1533	-	- && - && -	-
novel.399	-	scaffold0002	207466483	207472041	-	731	-	- && - && -	-
novel.398	-	scaffold0002	206659358	206688409	-	1796	-	- && - && -	-
novel.1038	-	scaffold0007	170701188	170704543	+	1344	-	- && - && -	-
novel.1632	-	scaffold0012	88720072	88722329	+	248	-	- && - && -	-
novel.1633	-	scaffold0012	88800725	88824003	+	2254	-	- && - && -	-
novel.1630	-	scaffold0012	78407821	78410231	+	623	-	- && - && -	-
novel.1631	-	scaffold0012	80876155	80877963	+	304	-	- && - && -	-
novel.1188	-	scaffold0008	25820604	25821949	-	1346	-	- && - && -	-
novel.1189	-	scaffold0008	27018413	27022050	-	685	-	- && - && -	-
novel.1634	-	scaffold0012	92643076	92643572	+	411	-	- && - && -	-
novel.1635	-	scaffold0012	93383157	93385359	+	1525	-	- && - && -	-
novel.1184	-	scaffold0008	23153566	23207770	-	1859	-	- && - && -	-
novel.1185	-	scaffold0008	24413459	24415294	-	1810	-	- && - && -	-
novel.1186	-	scaffold0008	24505312	24511678	-	2964	-	- && - && -	-
novel.1187	-	scaffold0008	24568831	24571144	-	364	-	- && - && -	-
novel.1180	-	scaffold0008	14521000	14532502	-	1378	-	- && - && -	-
novel.1181	-	scaffold0008	16323722	16330159	-	1338	-	- && - && -	-
novel.1182	-	scaffold0008	22048425	22049992	-	1568	-	- && - && -	-
novel.1183	-	scaffold0008	22188685	22205726	-	1822	-	- && - && -	-
novel.764	-	scaffold0005	1482017	1488523	-	2785	-	- && P11369.2 RecName: Full=LINE-1 retrotransposable element ORF2 protein; Short=ORF2p; AltName: Full=Long interspersed element-1; Short=L1; AltName: Full=Retrovirus-related Pol polyprotein LINE-1; Includes: RecName: Full=Reverse transcriptase; Includes:	-
novel.765	-	scaffold0005	1562919	1564432	-	743	-	- && - && -	-
novel.766	-	scaffold0005	2577102	2592173	-	2841	-	- && - && -	-
novel.767	-	scaffold0005	3523648	3547170	-	750	-	- && - && -	-
novel.760	-	scaffold0005	1151834	1154068	-	991	-	- && - && -	-
novel.761	-	scaffold0005	1240260	1241629	-	1370	-	- && - && -	-
novel.762	-	scaffold0005	1289782	1299502	-	1746	-	- && - && PF14672:Late cornified envelope	-
novel.763	-	scaffold0005	1359925	1362181	-	944	-	- && - && PF14672:Late cornified envelope	-
novel.768	-	scaffold0005	10188174	10189591	-	282	-	- && - && -	-
novel.769	-	scaffold0005	13109294	13118985	-	624	-	- && - && -	-
novel.162	-	scaffold0001	142935729	142937589	-	1014	-	- && - && -	-
novel.163	-	scaffold0001	142939551	142976663	-	4706	-	- && - && -	-
novel.160	-	scaffold0001	134985869	134991359	-	271	-	- && - && -	-
novel.161	-	scaffold0001	138169282	138170154	-	402	-	- && - && -	-
novel.166	-	scaffold0001	146981964	146982196	-	233	-	- && - && -	-
novel.167	-	scaffold0001	147817049	147821748	-	567	-	- && - && -	-
novel.164	-	scaffold0001	143841980	143845822	-	2180	-	- && O00370.1 RecName: Full=LINE-1 retrotransposable element ORF2 protein; Short=ORF2p; Includes: RecName: Full=Reverse transcriptase; Includes: RecName: Full=Endonuclease && -	-
novel.165	-	scaffold0001	143996675	144000117	-	652	-	- && - && -	-
novel.168	-	scaffold0001	148115321	148122024	-	1393	-	- && - && -	-
novel.169	-	scaffold0001	148543892	148546391	-	711	-	- && - && -	-
novel.788	-	scaffold0005	81236787	81242103	-	2984	-	- && - && -	-
novel.789	-	scaffold0005	86746619	86746818	-	200	-	- && - && -	-
novel.782	-	scaffold0005	55884227	55965541	-	208	-	- && - && -	-
novel.783	-	scaffold0005	67429214	67431210	-	1178	-	- && - && -	-
novel.780	-	scaffold0005	51266423	51275542	-	577	-	- && Q9UQF0.1 RecName: Full=Syncytin-1; AltName: Full=Endogenous retrovirus group W member 1; AltName: Full=Env-W; AltName: Full=Envelope polyprotein gPr73; AltName: Full=Enverin; AltName: Full=HERV-7q Envelope protein; AltName: Full=HERV-W envelope prote	-
novel.781	-	scaffold0005	54415896	54429431	-	1790	-	- && - && -	-
novel.786	-	scaffold0005	80208276	80210160	-	1117	-	- && - && -	-
novel.787	-	scaffold0005	81007510	81074138	-	8095	-	- && - && -	-
novel.784	-	scaffold0005	77701077	77702814	-	1048	-	- && - && -	-
novel.785	-	scaffold0005	79659276	79664338	-	3793	-	- && - && -	-
novel.1456	-	scaffold0010	60385394	60385837	-	444	-	- && - && -	-
novel.1457	-	scaffold0010	63138287	63140643	-	2141	-	- && - && -	-
novel.1454	-	scaffold0010	57633597	57634073	-	293	-	- && - && -	-
novel.1455	-	scaffold0010	60151094	60151521	-	232	-	- && - && -	-
novel.1452	-	scaffold0010	55073691	55077165	-	414	-	- && - && -	-
novel.1453	-	scaffold0010	56441079	56441548	-	387	-	- && - && -	-
novel.1450	-	scaffold0010	54936913	54941630	-	1788	-	- && - && -	-
novel.1451	-	scaffold0010	54974925	54981519	-	635	-	- && - && -	-
novel.1340	-	scaffold0009	50440908	50488404	-	3364	-	- && P31789.1 RecName: Full=Envelope glycoprotein; AltName: Full=Env polyprotein; Contains: RecName: Full=Surface protein; Short=SU; Contains: RecName: Full=Transmembrane protein; Short=TM; Flags: Precursor [Mouse Intracisternal A-particle] && -	-
novel.1458	-	scaffold0010	69107096	69149980	-	539	-	- && - && -	-
novel.1459	-	scaffold0010	69624533	69631596	-	463	-	- && - && -	-
novel.1341	-	scaffold0009	51603953	51605354	-	989	-	- && Q9D244.2 RecName: Full=Ribonuclease K6; Short=RNase K6; Flags: Precursor && -	-
novel.1346	-	scaffold0009	61590808	61592044	-	208	-	- && - && -	-
novel.1347	-	scaffold0009	61831008	61833248	-	2241	-	- && - && -	-
novel.306	-	scaffold0002	211587038	211588602	+	1236	-	- && - && -	-
novel.307	-	scaffold0002	213972245	213973795	+	502	-	- && - && -	-
novel.304	-	scaffold0002	208304735	208308231	+	2442	-	- && - && -	-
novel.305	-	scaffold0002	211099026	211102182	+	836	-	- && - && -	-
novel.302	-	scaffold0002	205750473	205750916	+	213	-	- && - && -	-
novel.303	-	scaffold0002	207888342	207889504	+	532	-	- && - && -	-
novel.300	-	scaffold0002	205208108	205209758	+	1028	-	- && - && -	-
novel.301	-	scaffold0002	205391814	205410276	+	344	-	- && - && -	-
novel.1345	-	scaffold0009	61187724	61188843	-	392	-	- && - && -	-
novel.308	-	scaffold0002	213976257	213983142	+	1901	-	- && - && -	-
novel.309	-	scaffold0002	214866813	214878215	+	2518	-	- && Q8TBZ8.1 RecName: Full=Zinc finger protein 564 && PF00096:Zinc finger, C2H2 type|PF01352:KRAB box	KRAB
novel.430	-	scaffold0003	89545633	89551129	+	1853	-	- && O00370.1 RecName: Full=LINE-1 retrotransposable element ORF2 protein; Short=ORF2p; Includes: RecName: Full=Reverse transcriptase; Includes: RecName: Full=Endonuclease && -	-
novel.431	-	scaffold0003	112951961	112963923	+	702	-	- && - && -	-
novel.432	-	scaffold0003	117983917	117987451	+	1575	-	- && P11369.2 RecName: Full=LINE-1 retrotransposable element ORF2 protein; Short=ORF2p; AltName: Full=Long interspersed element-1; Short=L1; AltName: Full=Retrovirus-related Pol polyprotein LINE-1; Includes: RecName: Full=Reverse transcriptase; Includes:	-
novel.433	-	scaffold0003	126919736	126930661	+	768	-	- && - && -	-
novel.434	-	scaffold0003	131828383	131828949	+	567	-	- && Q5T1C6.1 RecName: Full=Acyl-coenzyme A thioesterase THEM4; Short=Acyl-CoA thioesterase THEM4; AltName: Full=Carboxyl-terminal modulator protein; AltName: Full=Thioesterase superfamily member 4; Flags: Precursor && -	-
novel.435	-	scaffold0003	141358827	141362190	+	1760	-	- && - && -	-
novel.436	-	scaffold0003	141889540	141890397	+	454	-	- && - && -	-
novel.437	-	scaffold0003	145627498	145635907	+	459	-	- && - && -	-
novel.438	-	scaffold0003	145915890	145917738	+	1849	-	- && - && -	-
novel.439	-	scaffold0003	146863508	146863950	+	443	-	- && - && -	-
novel.1858	-	scaffold0015	5678762	5739710	+	1245	-	- && Q7SZ07.1 RecName: Full=Uncharacterized protein C16orf52 homolog B >Q8C784.2 RecName: Full=Uncharacterized protein C16orf52 homolog >Q8NHV5.3 RecName: Full=Uncharacterized protein C16orf52 && -	-
novel.1859	-	scaffold0015	6652699	6663235	+	302	-	- && - && -	-
novel.1852	-	scaffold0015	2193212	2204880	+	11407	-	- && P03355.4 RecName: Full=Gag-Pol polyprotein; Short=Pr180gag-pol; Contains: RecName: Full=Matrix protein p15; Short=MA; Contains: RecName: Full=RNA-binding phosphoprotein p12; AltName: Full=pp12; Contains: RecName: Full=Capsid protein p30; Short=CA; Co	Gag_p30
novel.1853	-	scaffold0015	2314540	2320422	+	1423	-	- && O00370.1 RecName: Full=LINE-1 retrotransposable element ORF2 protein; Short=ORF2p; Includes: RecName: Full=Reverse transcriptase; Includes: RecName: Full=Endonuclease && -	-
novel.1850	-	scaffold0014	55798580	55801875	-	799	-	- && - && -	-
novel.1851	-	scaffold0014	56159808	56165249	-	509	-	- && - && -	-
novel.1856	-	scaffold0015	5390649	5403930	+	383	-	- && - && -	-
novel.1857	-	scaffold0015	5476760	5572432	+	5561	-	- && P43136.2 RecName: Full=Nuclear receptor subfamily 2 group F member 6; AltName: Full=COUP transcription factor 3; Short=COUP-TF3; AltName: Full=V-erbA-related protein 2; Short=EAR-2 && PF00105:Zinc finger, C4 type (two domains)	zf-C4
novel.1854	-	scaffold0015	2781786	2784704	+	1003	-	- && - && -	-
novel.1855	-	scaffold0015	2797066	2797946	+	881	-	- && - && -	-
novel.238	-	scaffold0002	6868230	6871033	+	1229	-	- && - && -	-
novel.239	-	scaffold0002	13710929	14085501	+	9441	-	- && - && -	-
novel.548	-	scaffold0004	111967346	111969147	+	1557	-	- && - && -	-
novel.549	-	scaffold0004	117129993	117142174	+	1780	-	- && - && -	-
novel.544	-	scaffold0004	97605827	97634341	+	1211	-	- && - && -	-
novel.545	-	scaffold0004	98922272	98938728	+	260	-	- && - && -	-
novel.230	-	scaffold0002	2639458	2644995	+	724	-	- && - && -	-
novel.547	-	scaffold0004	105896233	105954135	+	3097	-	- && - && -	-
novel.540	-	scaffold0004	86243835	86255709	+	210	-	- && - && -	-
novel.541	-	scaffold0004	86959338	86976121	+	7056	-	- && - && -	-
novel.234	-	scaffold0002	3618613	3620798	+	2054	-	- && - && -	-
novel.235	-	scaffold0002	3622239	3625903	+	3665	-	- && - && -	-
novel.391	-	scaffold0002	191720523	191725428	-	2569	-	- && - && -	-
novel.69	-	scaffold0001	180115811	180117541	+	414	-	- && - && -	-
novel.898	-	scaffold0006	19397623	19525201	-	1166	-	- && - && -	-
novel.899	-	scaffold0006	28100510	28102983	-	2445	-	- && - && -	-
novel.896	-	scaffold0006	12974891	12977205	-	2110	-	- && - && -	-
novel.897	-	scaffold0006	15363110	15501344	-	304	-	- && - && -	-
novel.894	-	scaffold0006	9644578	9663004	-	319	-	- && - && -	-
novel.895	-	scaffold0006	11229231	11287527	-	5551	-	- && - && -	-
novel.892	-	scaffold0006	7179853	7230214	-	1787	-	- && - && -	-
novel.893	-	scaffold0006	7495402	7497220	-	680	-	- && - && -	-
novel.890	-	scaffold0006	526604	537998	-	283	-	- && Q3LAC4.2 RecName: Full=Phosphatidylinositol 3,4,5-trisphosphate-dependent Rac exchanger 2 protein; Short=P-Rex2; Short=PtdIns(3,4,5)-dependent Rac exchanger 2; AltName: Full=DEP domain-containing protein 2 && PF00610:Domain found in Dishevelled, Egl-	-
novel.891	-	scaffold0006	7054939	7115708	-	2147	-	- && - && -	-
novel.940	-	scaffold0006	139174870	139184110	-	3330	-	- && - && -	-
novel.941	-	scaffold0006	145588755	145593563	-	1616	-	- && - && -	-
novel.942	-	scaffold0006	146232822	146240900	-	508	-	- && - && -	-
novel.943	-	scaffold0006	149453894	149455815	-	1922	-	- && - && -	-
novel.944	-	scaffold0006	171402402	171402926	-	525	-	- && - && -	-
novel.945	-	scaffold0006	172617268	172633181	-	1286	-	- && - && -	-
novel.946	-	scaffold0006	172805423	172810162	-	3116	-	- && - && -	-
novel.947	-	scaffold0006	173894099	173905031	-	322	-	- && - && -	-
novel.948	-	scaffold0006	176813890	176828891	-	2524	-	- && - && -	-
novel.949	-	scaffold0006	180675915	180684026	-	764	-	- && - && -	-
novel.1539	-	scaffold0011	116967592	116969855	+	1235	-	- && - && -	-
novel.1538	-	scaffold0011	116068726	116078819	+	400	-	- && - && -	-
novel.1535	-	scaffold0011	111269567	111278721	+	2589	-	- && - && -	-
novel.1534	-	scaffold0011	108738828	109607023	+	1809	-	- && Q5NVD7.1 RecName: Full=ELMO domain-containing protein 1 && -	-
novel.1537	-	scaffold0011	113337725	113338429	+	263	-	- && - && -	-
novel.1536	-	scaffold0011	111798638	111801115	+	504	-	- && - && -	-
novel.1531	-	scaffold0011	105230760	105231436	+	228	-	- && - && -	-
novel.1530	-	scaffold0011	103500947	103501966	+	1020	-	- && - && -	-
novel.1533	-	scaffold0011	107538137	107543922	+	3214	-	- && - && -	-
novel.1532	-	scaffold0011	106140431	106287506	+	8613	-	- && - && -	-
novel.17	-	scaffold0001	51032890	51098158	+	212	-	- && - && -	-
novel.16	-	scaffold0001	49627357	49630797	+	1394	-	- && - && -	-
novel.15	-	scaffold0001	42962858	42963064	+	207	-	- && - && -	-
novel.14	-	scaffold0001	40441099	40442559	+	681	-	- && - && -	-
novel.13	-	scaffold0001	34882496	34910523	+	2567	-	- && - && -	-
novel.12	-	scaffold0001	22452296	22454207	+	477	-	- && - && -	-
novel.11	-	scaffold0001	18791384	18809100	+	237	-	- && - && -	-
novel.10	-	scaffold0001	17361183	17368789	+	2025	-	- && - && -	-
novel.19	-	scaffold0001	59948956	60018886	+	2632	-	- && - && -	-
novel.18	-	scaffold0001	54805496	54812001	+	278	-	- && - && -	-
novel.1573	-	scaffold0011	21518438	21523730	-	2926	-	- && - && -	-
novel.1572	-	scaffold0011	20588640	20590883	-	2244	-	- && - && -	-
novel.1621	-	scaffold0012	44687533	44687938	+	406	-	- && - && -	-
novel.53	-	scaffold0001	148001902	148003025	+	236	-	- && - && -	-
novel.1191	-	scaffold0008	29786220	29790115	-	1191	-	- && - && -	-
novel.1190	-	scaffold0008	28007880	28018683	-	367	-	- && - && -	-
novel.1625	-	scaffold0012	62766079	62773998	+	216	-	- && - && -	-
novel.1624	-	scaffold0012	59394268	59396177	+	259	-	- && - && -	-
novel.1195	-	scaffold0008	40554504	40555385	-	264	-	- && - && -	-
novel.1194	-	scaffold0008	40550803	40554125	-	858	-	- && - && -	-
novel.1629	-	scaffold0012	76031930	76038202	+	4039	-	- && P08548.1 RecName: Full=LINE-1 reverse transcriptase homolog && -	-
novel.1628	-	scaffold0012	74036974	74041095	+	4122	-	- && Q1HK80.1 RecName: Full=NADH-ubiquinone oxidoreductase chain 5; AltName: Full=NADH dehydrogenase subunit 5 && PF13631:Cytochrome b(N-terminal)/b6/petB|PF00032:Cytochrome b(C-terminal)/b6/petD|PF06455:NADH dehydrogenase subunit 5 C-terminus|PF00361:Pro	-
novel.1199	-	scaffold0008	45924710	45932339	-	7630	-	- && - && -	-
novel.1198	-	scaffold0008	45288758	45289119	-	240	-	- && - && -	-
novel.157	-	scaffold0001	128250984	128254990	-	513	-	- && - && -	-
novel.156	-	scaffold0001	128245275	128247668	-	1529	-	- && - && -	-
novel.155	-	scaffold0001	127711709	127731103	-	258	-	- && - && -	-
novel.154	-	scaffold0001	126782429	126831420	-	4865	-	- && O00370.1 RecName: Full=LINE-1 retrotransposable element ORF2 protein; Short=ORF2p; Includes: RecName: Full=Reverse transcriptase; Includes: RecName: Full=Endonuclease && -	-
novel.153	-	scaffold0001	123732498	123737555	-	2809	-	- && - && -	-
novel.152	-	scaffold0001	122017284	122033562	-	2937	-	- && - && -	-
novel.151	-	scaffold0001	119947523	119949260	-	1159	-	- && - && -	-
novel.150	-	scaffold0001	119807898	119809067	-	1056	-	- && - && -	-
novel.159	-	scaffold0001	133416192	133428511	-	893	-	- && - && -	-
novel.158	-	scaffold0001	130844139	130852388	-	600	-	- && - && -	-
novel.1021	-	scaffold0007	128908134	128910140	+	1807	-	- && - && -	-
novel.1445	-	scaffold0010	32521389	32522151	-	243	-	- && - && -	-
novel.1444	-	scaffold0010	24854134	24855523	-	1390	-	- && Q5GLZ8.1 RecName: Full=Probable E3 ubiquitin-protein ligase HERC4; AltName: Full=HECT domain and RCC1-like domain-containing protein 4; AltName: Full=HECT-type E3 ubiquitin transferase HERC4 && -	-
novel.1447	-	scaffold0010	38106361	38112980	-	297	-	- && - && -	-
novel.1446	-	scaffold0010	35860935	35861951	-	554	-	- && - && -	-
novel.1441	-	scaffold0010	11262535	11285470	-	427	-	- && - && -	-
novel.1440	-	scaffold0010	8512634	8578327	-	2074	-	- && P11369.2 RecName: Full=LINE-1 retrotransposable element ORF2 protein; Short=ORF2p; AltName: Full=Long interspersed element-1; Short=L1; AltName: Full=Retrovirus-related Pol polyprotein LINE-1; Includes: RecName: Full=Reverse transcriptase; Includes:	-
novel.1443	-	scaffold0010	17872613	17873730	-	1118	-	- && P31789.1 RecName: Full=Envelope glycoprotein; AltName: Full=Env polyprotein; Contains: RecName: Full=Surface protein; Short=SU; Contains: RecName: Full=Transmembrane protein; Short=TM; Flags: Precursor [Mouse Intracisternal A-particle] && PF00517:Ret	-
novel.1442	-	scaffold0010	15577267	15578068	-	802	-	- && - && -	-
novel.1449	-	scaffold0010	46788907	46802855	-	1535	-	- && - && -	-
novel.1448	-	scaffold0010	39890031	39895492	-	2206	-	- && - && -	-
novel.1134	-	scaffold0008	28248847	28263978	+	1223	-	- && - && -	-
novel.1020	-	scaffold0007	128035314	128036104	+	524	-	- && - && -	-
novel.339	-	scaffold0002	16908294	16920257	-	692	-	- && - && -	-
novel.338	-	scaffold0002	14067977	14085506	-	1017	-	- && - && -	-
novel.333	-	scaffold0002	11595106	11597721	-	387	-	- && - && -	-
novel.332	-	scaffold0002	10554226	10565151	-	1043	-	- && P58511.1 RecName: Full=Small integral membrane protein 11A && -	-
novel.331	-	scaffold0002	8127379	8130361	-	2094	-	- && - && -	-
novel.330	-	scaffold0002	6138398	6143038	-	3654	-	- && - && -	-
novel.337	-	scaffold0002	13908387	13937345	-	2906	-	- && - && -	-
novel.336	-	scaffold0002	13457589	13462239	-	2708	-	- && - && -	-
novel.335	-	scaffold0002	13021929	13025911	-	828	-	- && - && -	-
novel.334	-	scaffold0002	12740663	12747706	-	238	-	- && - && -	-
novel.233	-	scaffold0002	2952114	2953469	+	791	-	- && - && -	-
novel.555	-	scaffold0004	131779627	132005409	+	245	-	- && - && -	-
novel.554	-	scaffold0004	131124418	131138316	+	299	-	- && - && -	-
novel.445	-	scaffold0003	178089426	178090290	+	322	-	- && - && -	-
novel.444	-	scaffold0003	177227682	177232015	+	4334	-	- && - && -	-
novel.447	-	scaffold0003	178839055	178845770	+	2184	-	- && - && -	-
novel.446	-	scaffold0003	178532079	178540081	+	598	-	- && - && -	-
novel.441	-	scaffold0003	156658689	156668331	+	473	-	- && - && -	-
novel.440	-	scaffold0003	154755917	154762898	+	3393	-	- && - && -	-
novel.443	-	scaffold0003	157229070	157270645	+	2087	-	- && - && -	-
novel.442	-	scaffold0003	156742826	156743303	+	478	-	- && - && -	-
novel.449	-	scaffold0003	187190317	187191034	+	428	-	- && - && -	-
novel.448	-	scaffold0003	178897962	178898222	+	261	-	- && - && -	-
novel.1849	-	scaffold0014	54053442	54057716	-	2365	-	- && - && -	-
novel.1848	-	scaffold0014	51500798	51502530	-	983	-	- && - && -	-
novel.1841	-	scaffold0014	46164359	46175663	-	697	-	- && - && -	-
novel.1840	-	scaffold0014	45741009	45742473	-	1465	-	- && - && -	-
novel.1843	-	scaffold0014	46508938	46513838	-	1641	-	- && - && -	-
novel.1842	-	scaffold0014	46508110	46508860	-	751	-	- && - && -	-
novel.1845	-	scaffold0014	48463751	48465766	-	2016	-	- && - && -	-
novel.1844	-	scaffold0014	46759955	46764643	-	3282	-	- && - && -	-
novel.1847	-	scaffold0014	51017039	51023776	-	6738	-	- && - && -	-
novel.1846	-	scaffold0014	50363600	50364047	-	448	-	- && - && -	-
novel.209	-	scaffold0001	281951028	281952093	-	540	-	- && - && -	-
novel.208	-	scaffold0001	278756954	278763836	-	240	-	- && - && -	-
novel.207	-	scaffold0001	272428031	272431342	-	620	-	- && - && -	-
novel.206	-	scaffold0001	266363887	266364267	-	381	-	- && - && -	-
novel.205	-	scaffold0001	263376239	263381381	-	423	-	- && - && -	-
novel.204	-	scaffold0001	255867510	255900175	-	1125	-	- && - && -	-
novel.203	-	scaffold0001	255074253	255078642	-	306	-	- && - && -	-
novel.202	-	scaffold0001	250872548	250888977	-	2323	-	- && - && -	-
novel.201	-	scaffold0001	250796338	250797279	-	793	-	- && - && -	-
novel.200	-	scaffold0001	250599532	250618766	-	812	-	- && - && -	-
novel.936	-	scaffold0006	130277691	130316397	-	245	-	- && - && -	-
novel.1258	-	scaffold0009	11504938	11509152	+	282	-	- && - && -	-
novel.1707	-	scaffold0013	86533247	86534351	+	306	-	- && - && -	-
novel.52	-	scaffold0001	146752260	146753710	+	1348	-	- && - && -	-
novel.1256	-	scaffold0009	4676280	4695978	+	1260	-	- && - && -	-
novel.935	-	scaffold0006	129014925	129042517	-	228	-	- && O00370.1 RecName: Full=LINE-1 retrotransposable element ORF2 protein; Short=ORF2p; Includes: RecName: Full=Reverse transcriptase; Includes: RecName: Full=Endonuclease && -	-
novel.934	-	scaffold0006	128324694	128331332	-	1039	-	- && - && -	-
novel.937	-	scaffold0006	131967285	131973483	-	5505	-	- && Q9UPZ6.4 RecName: Full=Thrombospondin type-1 domain-containing protein 7A; Flags: Precursor && -	-
novel.1709	-	scaffold0013	89200702	89231211	+	349	-	- && - && -	-
novel.931	-	scaffold0006	109681170	109688362	-	898	-	- && Q7M2P1.1 RecName: Full=Spermatid nuclear transition protein 3; Short=STP-3; Short=TP-3; Short=TP3 && -	-
novel.930	-	scaffold0006	109492947	109561265	-	2243	-	- && - && -	-
novel.933	-	scaffold0006	128191464	128192097	-	270	-	- && - && -	-
novel.932	-	scaffold0006	111913929	111920075	-	1840	-	- && - && -	-
novel.939	-	scaffold0006	136127922	136130331	-	240	-	- && - && -	-
novel.938	-	scaffold0006	133473572	133479619	-	963	-	- && - && -	-
novel.849	-	scaffold0006	85507433	85508450	+	884	-	- && - && -	-
novel.848	-	scaffold0006	84150426	84153632	+	927	-	- && - && -	-
novel.841	-	scaffold0006	70807381	70840498	+	2733	-	- && - && -	-
novel.840	-	scaffold0006	70683510	70742599	+	3685	-	- && - && -	-
novel.843	-	scaffold0006	71674318	71675405	+	697	-	- && - && -	-
novel.842	-	scaffold0006	71285680	71288564	+	2885	-	- && - && -	-
novel.845	-	scaffold0006	72072390	72076673	+	1676	-	- && - && -	-
novel.844	-	scaffold0006	71704318	71729343	+	4852	-	- && - && -	-
novel.847	-	scaffold0006	73636076	73861759	+	3431	-	- && - && -	-
novel.846	-	scaffold0006	72569526	72572716	+	1546	-	- && - && -	-
novel.1052	-	scaffold0007	15225198	15231745	-	576	-	- && - && -	-
novel.1053	-	scaffold0007	15727582	15742325	-	1701	-	- && - && -	-
novel.28	-	scaffold0001	87642140	87643765	+	872	-	- && - && -	-
novel.29	-	scaffold0001	87776696	87781491	+	214	-	- && - && -	-
novel.1056	-	scaffold0007	25555773	25556282	-	266	-	- && - && -	-
novel.1057	-	scaffold0007	27666133	27668723	-	1025	-	- && - && -	-
novel.1054	-	scaffold0007	16828274	16828855	-	582	-	- && - && -	-
novel.1055	-	scaffold0007	18500984	18695092	-	10170	-	- && - && -	-
novel.22	-	scaffold0001	68785127	68785931	+	343	-	- && - && -	-
novel.1509	-	scaffold0011	27490338	27495579	+	564	-	- && - && -	-
novel.20	-	scaffold0001	65314064	65317816	+	1816	-	- && - && -	-
novel.21	-	scaffold0001	65551908	65554859	+	2682	-	- && - && -	-
novel.26	-	scaffold0001	87434815	87436413	+	584	-	- && - && PF00517:Retroviral envelope protein	-
novel.27	-	scaffold0001	87470755	87480500	+	474	-	- && - && -	-
novel.24	-	scaffold0001	79381412	79393315	+	257	-	- && - && -	-
novel.25	-	scaffold0001	82712602	82713245	+	325	-	- && - && -	-
novel.1614	-	scaffold0012	26592010	26597706	+	1038	-	- && - && -	-
novel.1615	-	scaffold0012	29078425	29084349	+	1327	-	- && - && -	-
novel.1616	-	scaffold0012	29480909	29481484	+	209	-	- && - && -	-
novel.1617	-	scaffold0012	29823310	29824192	+	883	-	- && - && -	-
novel.1610	-	scaffold0012	19008006	19010165	+	356	-	- && - && -	-
novel.1611	-	scaffold0012	20546733	20548017	+	1285	-	- && - && -	-
novel.1612	-	scaffold0012	20665364	20665916	+	553	-	- && - && -	-
novel.1613	-	scaffold0012	26409909	26411417	+	720	-	- && - && -	-
novel.1618	-	scaffold0012	33430249	33437231	+	336	-	- && - && -	-
novel.1619	-	scaffold0012	39711089	39714121	+	3033	-	- && P04026.1 RecName: Full=Putative Pol polyprotein; Contains: RecName: Full=Reverse transcriptase/ribonuclease H; Short=RT; Contains: RecName: Full=Integrase; Short=IN [Golden hamster intracisternal A-particle H18] && PF00665:Integrase core domain|PF005	rve
novel.148	-	scaffold0001	117018899	117021375	-	2477	-	- && - && -	-
novel.149	-	scaffold0001	118040505	118041399	-	273	-	- && - && -	-
novel.140	-	scaffold0001	84354594	84361646	-	1590	-	- && - && -	-
novel.141	-	scaffold0001	84364493	84373696	-	263	-	- && P62893.2 RecName: Full=60S ribosomal protein L39 >P62891.2 RecName: Full=60S ribosomal protein L39 >P62892.2 RecName: Full=60S ribosomal protein L39 >Q3T051.3 RecName: Full=60S ribosomal protein L39 && PF00832:Ribosomal L39 protein	-
novel.142	-	scaffold0001	88146044	88182310	-	582	-	- && - && -	-
novel.143	-	scaffold0001	91118239	91128457	-	755	-	- && - && -	-
novel.144	-	scaffold0001	91171648	91173800	-	1781	-	- && - && -	-
novel.145	-	scaffold0001	99580718	99587199	-	295	-	- && - && -	-
novel.146	-	scaffold0001	100194804	100197759	-	679	-	- && - && -	-
novel.147	-	scaffold0001	113267598	113349309	-	2641	-	- && Q9H8W2.2 RecName: Full=Putative uncharacterized protein encoded by LINC00472 && -	-
novel.1290	-	scaffold0009	88351896	88386253	+	341	-	- && - && -	-
novel.1291	-	scaffold0009	95569683	95628308	+	205	-	- && - && -	-
novel.1292	-	scaffold0009	99343669	99350161	+	529	-	- && - && -	-
novel.1293	-	scaffold0009	102692982	102704451	+	2297	-	- && - && -	-
novel.1294	-	scaffold0009	104193677	104195858	+	508	-	- && - && -	-
novel.1295	-	scaffold0009	105893702	105894083	+	265	-	- && - && -	-
novel.1296	-	scaffold0009	107598501	107622136	+	828	-	- && - && -	-
novel.1297	-	scaffold0009	108232369	108263062	+	227	-	- && - && -	-
novel.1298	-	scaffold0009	113171437	113181965	+	466	-	- && - && -	-
novel.1299	-	scaffold0009	116280328	116285635	+	5308	-	- && P99025.3 RecName: Full=GTP cyclohydrolase 1 feedback regulatory protein; Short=GFRP; AltName: Full=GTP cyclohydrolase I feedback regulatory protein; AltName: Full=p35 && PF06399:GTP cyclohydrolase I feedback regulatory protein (GFRP)	-
novel.1478	-	scaffold0010	117423348	117424803	-	285	-	- && - && -	-
novel.1479	-	scaffold0010	117466781	117483355	-	1049	-	- && - && -	-
novel.1470	-	scaffold0010	97689098	97689754	-	255	-	- && - && -	-
novel.1471	-	scaffold0010	103487626	103489911	-	815	-	- && - && -	-
novel.1472	-	scaffold0010	107013778	107015328	-	1551	-	- && Q2F7J1.1 RecName: Full=Envelope glycoprotein; AltName: Full=Env polyprotein; Contains: RecName: Full=Surface protein; Short=SU; Contains: RecName: Full=Transmembrane protein; Short=TM; Contains: RecName: Full=R-peptide; Flags: Precursor && -	-
novel.1473	-	scaffold0010	107535119	107539564	-	4446	-	- && - && -	-
novel.1474	-	scaffold0010	109147509	109149283	-	1321	-	- && - && -	-
novel.1475	-	scaffold0010	109149449	109150043	-	595	-	- && - && -	-
novel.1476	-	scaffold0010	111264308	111283698	-	475	-	- && - && -	-
novel.1477	-	scaffold0010	115051017	115052606	-	1590	-	- && - && -	-
novel.1278	-	scaffold0009	55906269	55909521	+	3253	-	- && - && -	-
novel.1279	-	scaffold0009	57167163	57227215	+	223	-	- && - && -	-
novel.1272	-	scaffold0009	40837531	40840013	+	2483	-	- && O00370.1 RecName: Full=LINE-1 retrotransposable element ORF2 protein; Short=ORF2p; Includes: RecName: Full=Reverse transcriptase; Includes: RecName: Full=Endonuclease && -	-
novel.1273	-	scaffold0009	42346906	42353704	+	3202	-	- && - && -	-
novel.1270	-	scaffold0009	39052527	39053443	+	799	-	- && - && -	-
novel.1271	-	scaffold0009	39482273	39497721	+	2110	-	- && - && -	-
novel.1276	-	scaffold0009	51797969	51810448	+	6365	-	- && O00370.1 RecName: Full=LINE-1 retrotransposable element ORF2 protein; Short=ORF2p; Includes: RecName: Full=Reverse transcriptase; Includes: RecName: Full=Endonuclease && -	-
novel.1277	-	scaffold0009	54624863	54634177	+	3919	-	- && O00370.1 RecName: Full=LINE-1 retrotransposable element ORF2 protein; Short=ORF2p; Includes: RecName: Full=Reverse transcriptase; Includes: RecName: Full=Endonuclease && -	-
novel.1274	-	scaffold0009	42825445	42828167	+	2723	-	- && P03342.1 RecName: Full=Gag polyprotein; AltName: Full=Core polyprotein; Contains: RecName: Full=Matrix protein p15; Short=MA; Contains: RecName: Full=RNA-binding phosphoprotein p12; AltName: Full=pp12; Contains: RecName: Full=Capsid protein p30; Shor	Gag_p30
novel.1275	-	scaffold0009	49902734	49908010	+	2830	-	- && - && -	-
novel.328	-	scaffold0002	2326937	2327190	-	254	-	- && - && -	-
novel.329	-	scaffold0002	2369825	2370706	-	544	-	- && - && -	-
novel.324	-	scaffold0002	1354192	1357428	-	743	-	- && - && -	-
novel.325	-	scaffold0002	1447515	1451074	-	3560	-	- && - && -	-
novel.326	-	scaffold0002	2001339	2006301	-	3086	-	- && - && -	-
novel.327	-	scaffold0002	2023094	2025010	-	1917	-	- && - && -	-
novel.320	-	scaffold0002	223251378	223252397	+	351	-	- && - && -	-
novel.321	-	scaffold0002	223275374	223277390	+	1250	-	- && - && -	-
novel.322	-	scaffold0002	223346072	223348254	+	2183	-	- && - && -	-
novel.323	-	scaffold0002	1177586	1180044	-	1282	-	- && - && -	-
novel.456	-	scaffold0003	2093291	2142961	-	664	-	- && - && -	-
novel.457	-	scaffold0003	4602169	4664843	-	7852	-	- && - && -	-
novel.454	-	scaffold0003	209551185	209553272	+	244	-	- && - && -	-
novel.455	-	scaffold0003	140307	207154	-	4575	-	- && Q2PPJ7.2 RecName: Full=Ral GTPase-activating protein subunit alpha-2; AltName: Full=250 kDa substrate of Akt; Short=AS250; AltName: Full=p220 && -	-
novel.452	-	scaffold0003	207304565	207305153	+	208	-	- && - && -	-
novel.453	-	scaffold0003	208738542	208765858	+	635	-	- && - && -	-
novel.450	-	scaffold0003	188537770	188538982	+	650	-	- && - && -	-
novel.451	-	scaffold0003	207229845	207232543	+	2676	-	- && - && -	-
novel.458	-	scaffold0003	6924800	6930872	-	1792	-	- && - && -	-
novel.459	-	scaffold0003	7108984	7110544	-	1561	-	- && - && -	-
novel.286	-	scaffold0002	150351160	150353235	+	730	-	- && - && -	-
novel.1878	-	scaffold0015	31640919	31641899	+	981	-	- && - && -	-
novel.1879	-	scaffold0015	32833511	32834514	+	1004	-	- && - && -	-
novel.1874	-	scaffold0015	27600128	27600984	+	440	-	- && - && -	-
novel.1875	-	scaffold0015	28940891	28948078	+	2706	-	- && - && -	-
novel.1876	-	scaffold0015	29335876	29336680	+	572	-	- && - && -	-
novel.1877	-	scaffold0015	31259783	31269854	+	10072	-	- && - && -	-
novel.1870	-	scaffold0015	23034139	23035970	+	478	-	- && - && -	-
novel.1871	-	scaffold0015	24898575	24899759	+	715	-	- && - && -	-
novel.1872	-	scaffold0015	25948041	25950460	+	2420	-	- && - && -	-
novel.1873	-	scaffold0015	26342285	26342517	+	233	-	- && - && -	-
novel.210	-	scaffold0001	282784852	282829733	-	3121	-	- && - && -	-
novel.211	-	scaffold0001	283511129	283520447	-	2083	-	- && - && -	-
novel.212	-	scaffold0001	283618238	283624215	-	913	-	- && P11369.2 RecName: Full=LINE-1 retrotransposable element ORF2 protein; Short=ORF2p; AltName: Full=Long interspersed element-1; Short=L1; AltName: Full=Retrovirus-related Pol polyprotein LINE-1; Includes: RecName: Full=Reverse transcriptase; Includes:	-
novel.213	-	scaffold0001	283628367	283629421	-	1055	-	- && - && -	-
novel.214	-	scaffold0001	285201277	285219741	-	2678	-	- && - && -	-
novel.215	-	scaffold0001	287199254	287201000	-	1452	-	- && - && -	-
novel.216	-	scaffold0001	288259822	288260066	-	245	-	- && - && -	-
novel.217	-	scaffold0001	300939083	300959985	-	7365	-	- && - && -	-
novel.218	-	scaffold0001	306898697	306901785	-	713	-	- && - && -	-
novel.219	-	scaffold0001	308822037	308847181	-	1261	-	- && - && -	-
novel.1500	-	scaffold0011	10145450	10156384	+	7384	-	- && - && -	-
novel.1501	-	scaffold0011	10959364	10967041	+	664	-	- && - && -	-
novel.1039	-	scaffold0007	171051537	171054472	+	512	-	- && - && -	-
novel.1050	-	scaffold0007	9164418	9165383	-	966	-	- && - && -	-
novel.1051	-	scaffold0007	9727209	9734931	-	633	-	- && - && -	-
novel.1504	-	scaffold0011	18280359	18280593	+	235	-	- && - && -	-
novel.1505	-	scaffold0011	19155700	19177260	+	5028	-	- && O00370.1 RecName: Full=LINE-1 retrotransposable element ORF2 protein; Short=ORF2p; Includes: RecName: Full=Reverse transcriptase; Includes: RecName: Full=Endonuclease && -	-
novel.1506	-	scaffold0011	24761285	24763601	+	1014	-	- && - && -	-
novel.1507	-	scaffold0011	26674645	26678514	+	451	-	- && Q30KK4.1 RecName: Full=Beta-defensin 124; AltName: Full=Defensin, beta 124; Flags: Precursor && -	-
novel.1508	-	scaffold0011	27169333	27169835	+	503	-	- && - && -	-
novel.23	-	scaffold0001	69223343	69225241	+	205	-	- && - && -	-
novel.1058	-	scaffold0007	44095679	44147679	-	255	-	- && - && -	-
novel.1203	-	scaffold0008	47155824	47157719	-	1638	-	- && - && -	-
novel.588	-	scaffold0004	26653853	26671036	-	1211	-	- && Q6NVG5.1 RecName: Full=Melanoregulin; AltName: Full=Dilute suppressor protein; AltName: Full=Whn-dependent transcript 2 && -	-
novel.1059	-	scaffold0007	44231390	44236784	-	5395	-	- && P11369.2 RecName: Full=LINE-1 retrotransposable element ORF2 protein; Short=ORF2p; AltName: Full=Long interspersed element-1; Short=L1; AltName: Full=Retrovirus-related Pol polyprotein LINE-1; Includes: RecName: Full=Reverse transcriptase; Includes:	-
novel.1798	-	scaffold0014	45749283	45751549	+	2081	-	- && - && -	-
novel.280	-	scaffold0002	132917341	132918807	+	1467	-	- && - && -	-
novel.1794	-	scaffold0014	44456873	44457196	+	324	-	- && - && -	-
novel.586	-	scaffold0004	26285122	26292329	-	356	-	- && - && -	-
novel.1819	-	scaffold0014	15463555	15466931	-	2778	-	- && Q9UN81.1 RecName: Full=LINE-1 retrotransposable element ORF1 protein; Short=L1ORF1p; AltName: Full=LINE retrotransposable element 1; AltName: Full=LINE1 retrotransposable element 1 && -	-
novel.926	-	scaffold0006	105918810	105919908	-	908	-	- && - && -	-
novel.927	-	scaffold0006	106214084	106214797	-	470	-	- && - && -	-
novel.924	-	scaffold0006	91037985	91038259	-	275	-	- && - && -	-
novel.925	-	scaffold0006	99376478	99381376	-	440	-	- && - && -	-
novel.922	-	scaffold0006	88420600	88421058	-	459	-	- && - && -	-
novel.923	-	scaffold0006	90978162	90982525	-	1163	-	- && - && -	-
novel.920	-	scaffold0006	86760334	86764566	-	662	-	- && - && -	-
novel.921	-	scaffold0006	86765318	86767104	-	1088	-	- && - && -	-
novel.928	-	scaffold0006	106329795	106366410	-	507	-	- && - && -	-
novel.929	-	scaffold0006	107149431	107154493	-	5063	-	- && - && -	-
novel.858	-	scaffold0006	111353129	111355271	+	362	-	- && - && -	-
novel.859	-	scaffold0006	119073660	119073932	+	273	-	- && - && -	-
novel.852	-	scaffold0006	90985214	90986614	+	261	-	- && - && -	-
novel.853	-	scaffold0006	94736306	94757298	+	2279	-	- && - && -	-
novel.850	-	scaffold0006	85972474	85973599	+	1126	-	- && - && -	-
novel.851	-	scaffold0006	86945754	86945974	+	221	-	- && - && -	-
novel.856	-	scaffold0006	106207699	106212932	+	217	-	- && - && -	-
novel.857	-	scaffold0006	107119390	107145436	+	2741	-	- && - && -	-
novel.854	-	scaffold0006	100658793	100661426	+	2167	-	- && - && -	-
novel.855	-	scaffold0006	101117351	101117602	+	252	-	- && - && -	-
novel.1041	-	scaffold0007	174059435	174059685	+	251	-	- && - && -	-
novel.1040	-	scaffold0007	173484925	173493452	+	1206	-	- && - && -	-
novel.1043	-	scaffold0007	175641875	175642623	+	363	-	- && - && -	-
novel.1042	-	scaffold0007	175605309	175640614	+	384	-	- && - && -	-
novel.1045	-	scaffold0007	176580183	176581302	+	1120	-	- && - && -	-
novel.1044	-	scaffold0007	176025209	176027217	+	2009	-	- && - && -	-
novel.1047	-	scaffold0007	1342294	1344162	-	285	-	- && - && -	-
novel.1046	-	scaffold0007	1153611	1216862	-	788	-	- && - && -	-
novel.1049	-	scaffold0007	8278277	8281699	-	1010	-	- && - && -	-
novel.1048	-	scaffold0007	3689674	3692091	-	763	-	- && - && -	-
novel.37	-	scaffold0001	118692615	118693039	+	296	-	- && - && -	-
novel.36	-	scaffold0001	98670603	98685379	+	2792	-	- && - && -	-
novel.31	-	scaffold0001	89748548	89754848	+	210	-	- && - && -	-
novel.30	-	scaffold0001	88715298	88734836	+	1757	-	- && - && -	-
novel.33	-	scaffold0001	95639056	95646367	+	6971	-	- && P04026.1 RecName: Full=Putative Pol polyprotein; Contains: RecName: Full=Reverse transcriptase/ribonuclease H; Short=RT; Contains: RecName: Full=Integrase; Short=IN [Golden hamster intracisternal A-particle H18] && PF02337:Retroviral GAG p10 protein|	rve
novel.32	-	scaffold0001	93785718	93791916	+	816	-	- && - && -	-
novel.1207	-	scaffold0008	50356668	50359141	-	274	-	- && - && -	-
novel.91	-	scaffold0001	264275539	264283178	+	208	-	- && - && -	-
novel.90	-	scaffold0001	263359571	263366585	+	3597	-	- && A4Z945.1 RecName: Full=Protein ZBED8; AltName: Full=Transposon-derived Buster3 transposase-like protein; AltName: Full=Zinc finger BED domain-containing protein 8 && -	-
novel.1206	-	scaffold0008	49945640	49946240	-	320	-	- && - && -	-
novel.1609	-	scaffold0012	17857199	17858685	+	1487	-	- && P67808.3 RecName: Full=Nuclease-sensitive element-binding protein 1; AltName: Full=CCAAT-binding transcription factor I subunit A; Short=CBF-A; AltName: Full=DNA-binding protein B; Short=DBPB; AltName: Full=Enhancer factor I subunit A; Short=EFI-A; A	CSD
novel.1608	-	scaffold0012	16804835	16808662	+	3828	-	- && - && -	-
novel.1603	-	scaffold0011	136187312	136197667	-	3436	-	- && - && -	-
novel.1602	-	scaffold0011	130974065	130976217	-	710	-	- && - && -	-
novel.1601	-	scaffold0011	130875510	130876904	-	731	-	- && - && -	-
novel.1600	-	scaffold0011	123938898	123939670	-	773	-	- && - && -	-
novel.1607	-	scaffold0012	2407536	2410159	+	2577	-	- && - && -	-
novel.1606	-	scaffold0012	2311326	2312220	+	263	-	- && - && -	-
novel.1605	-	scaffold0012	1318059	1322036	+	2425	-	- && - && -	-
novel.1604	-	scaffold0011	140023725	140033721	-	5218	-	- && P11369.2 RecName: Full=LINE-1 retrotransposable element ORF2 protein; Short=ORF2p; AltName: Full=Long interspersed element-1; Short=L1; AltName: Full=Retrovirus-related Pol polyprotein LINE-1; Includes: RecName: Full=Reverse transcriptase; Includes:	-
novel.139	-	scaffold0001	81786360	81790496	-	592	-	- && - && -	-
novel.138	-	scaffold0001	79004188	79090511	-	279	-	- && - && -	-
novel.135	-	scaffold0001	68681196	68683070	-	1106	-	- && - && -	-
novel.134	-	scaffold0001	67455078	67455706	-	215	-	- && - && -	-
novel.137	-	scaffold0001	78397970	78402921	-	463	-	- && - && -	-
novel.136	-	scaffold0001	73951404	73967611	-	782	-	- && - && -	-
novel.131	-	scaffold0001	58908775	58916424	-	1427	-	- && - && -	-
novel.130	-	scaffold0001	57982400	57983658	-	722	-	- && - && -	-
novel.133	-	scaffold0001	65069713	65070231	-	519	-	- && - && -	-
novel.132	-	scaffold0001	60758647	60761001	-	2355	-	- && - && PF02337:Retroviral GAG p10 protein	-
novel.1287	-	scaffold0009	69420156	69421360	+	513	-	- && - && -	-
novel.1286	-	scaffold0009	69357762	69359776	+	2015	-	- && - && -	-
novel.1285	-	scaffold0009	68988644	68990904	+	238	-	- && - && -	-
novel.1284	-	scaffold0009	68672757	68677279	+	1103	-	- && - && -	-
novel.1283	-	scaffold0009	65906879	65907357	+	479	-	- && - && -	-
novel.1282	-	scaffold0009	62932106	62933392	+	527	-	- && - && -	-
novel.1281	-	scaffold0009	57513017	57520291	+	328	-	- && - && -	-
novel.1280	-	scaffold0009	57351402	57352482	+	232	-	- && - && -	-
novel.1205	-	scaffold0008	49073591	49079556	-	5966	-	- && - && -	-
novel.1289	-	scaffold0009	88327010	88345755	+	237	-	- && - && -	-
novel.1288	-	scaffold0009	82395744	82396872	+	999	-	- && - && -	-
novel.1204	-	scaffold0008	48991884	48992978	-	586	-	- && - && -	-
novel.1469	-	scaffold0010	97680934	97688944	-	338	-	- && - && -	-
novel.1468	-	scaffold0010	97240915	97243459	-	2545	-	- && - && -	-
novel.1467	-	scaffold0010	95785554	95828830	-	1016	-	- && - && -	-
novel.1466	-	scaffold0010	95018889	95030330	-	992	-	- && Q9Y616.2 RecName: Full=Interleukin-1 receptor-associated kinase 3; Short=IRAK-3; AltName: Full=IL-1 receptor-associated kinase M; Short=IRAK-M && -	-
novel.1465	-	scaffold0010	94208408	94213718	-	961	-	- && - && -	-
novel.1464	-	scaffold0010	90881831	90883016	-	315	-	- && - && -	-
novel.1463	-	scaffold0010	88870690	88983577	-	1392	-	- && P11369.2 RecName: Full=LINE-1 retrotransposable element ORF2 protein; Short=ORF2p; AltName: Full=Long interspersed element-1; Short=L1; AltName: Full=Retrovirus-related Pol polyprotein LINE-1; Includes: RecName: Full=Reverse transcriptase; Includes:	-
novel.1462	-	scaffold0010	82048143	82057780	-	325	-	- && - && -	-
novel.1461	-	scaffold0010	78682738	78686010	-	232	-	- && - && -	-
novel.1460	-	scaffold0010	74259238	74279701	-	1715	-	- && - && -	-
novel.1269	-	scaffold0009	35082913	35084625	+	586	-	- && - && -	-
novel.1268	-	scaffold0009	35032933	35035413	+	494	-	- && - && -	-
novel.1201	-	scaffold0008	46172292	46180736	-	2900	-	- && - && -	-
novel.1261	-	scaffold0009	21048419	21052619	+	523	-	- && - && -	-
novel.1260	-	scaffold0009	21025677	21028714	+	3038	-	- && - && -	-
novel.1263	-	scaffold0009	30228791	30229668	+	709	-	- && - && -	-
novel.1262	-	scaffold0009	23248088	23249230	+	203	-	- && - && -	-
novel.1265	-	scaffold0009	33075452	33083379	+	758	-	- && - && -	-
novel.1264	-	scaffold0009	31347302	31350298	+	236	-	- && - && -	-
novel.1267	-	scaffold0009	34189288	34192291	+	305	-	- && - && -	-
novel.1266	-	scaffold0009	34142291	34145411	+	270	-	- && - && -	-
novel.683	-	scaffold0005	29537716	29537917	+	202	-	- && - && -	-
novel.682	-	scaffold0005	29434153	29469177	+	878	-	- && - && -	-
novel.681	-	scaffold0005	25021136	25025181	+	234	-	- && - && -	-
novel.680	-	scaffold0005	13036843	13042849	+	281	-	- && - && -	-
novel.687	-	scaffold0005	56408903	56409342	+	440	-	- && - && -	-
novel.686	-	scaffold0005	43662900	43721022	+	3216	-	- && O00370.1 RecName: Full=LINE-1 retrotransposable element ORF2 protein; Short=ORF2p; Includes: RecName: Full=Reverse transcriptase; Includes: RecName: Full=Endonuclease && -	-
novel.685	-	scaffold0005	38735941	38737906	+	692	-	- && - && -	-
novel.684	-	scaffold0005	32952622	32956339	+	502	-	- && - && -	-
novel.689	-	scaffold0005	66168211	66189109	+	1622	-	- && - && -	-
novel.688	-	scaffold0005	62471144	62475804	+	705	-	- && - && -	-
novel.1202	-	scaffold0008	46193038	46199100	-	4378	-	- && - && -	-
novel.669	-	scaffold0004	207666762	207688543	-	1450	-	- && - && -	-
novel.668	-	scaffold0004	206750333	206754017	-	2426	-	- && - && -	-
novel.1200	-	scaffold0008	46155008	46157770	-	821	-	- && - && -	-
novel.661	-	scaffold0004	190737351	190744864	-	445	-	- && - && -	-
novel.660	-	scaffold0004	190701827	190706269	-	4443	-	- && P04026.1 RecName: Full=Putative Pol polyprotein; Contains: RecName: Full=Reverse transcriptase/ribonuclease H; Short=RT; Contains: RecName: Full=Integrase; Short=IN [Golden hamster intracisternal A-particle H18] && PF02022:Integrase Zinc binding doma	rve
novel.663	-	scaffold0004	196613435	196653746	-	298	-	- && - && PF00832:Ribosomal L39 protein	-
novel.662	-	scaffold0004	192801522	192809293	-	219	-	- && - && -	-
novel.665	-	scaffold0004	202202884	202211631	-	8320	-	- && - && -	-
novel.664	-	scaffold0004	198068204	198071527	-	1197	-	- && - && -	-
novel.667	-	scaffold0004	204557635	204560735	-	565	-	- && - && -	-
novel.666	-	scaffold0004	203011231	203014464	-	2227	-	- && - && -	-
novel.1863	-	scaffold0015	14144688	14146017	+	1330	-	- && - && -	-
novel.1862	-	scaffold0015	13795229	13795969	+	741	-	- && P03359.1 RecName: Full=Pol polyprotein; Contains: RecName: Full=Reverse transcriptase/ribonuclease H; Short=RT; Contains: RecName: Full=Integrase; Short=IN && -	-
novel.1861	-	scaffold0015	12085098	12104054	+	541	-	- && - && -	-
novel.1860	-	scaffold0015	7765890	7771850	+	322	-	- && - && -	-
novel.1867	-	scaffold0015	18077628	18097881	+	988	-	- && - && -	-
novel.1866	-	scaffold0015	16955186	16956920	+	1685	-	- && - && -	-
novel.1865	-	scaffold0015	16064803	16072542	+	1026	-	- && - && -	-
novel.1864	-	scaffold0015	15781716	15785384	+	2947	-	- && O00370.1 RecName: Full=LINE-1 retrotransposable element ORF2 protein; Short=ORF2p; Includes: RecName: Full=Reverse transcriptase; Includes: RecName: Full=Endonuclease && -	-
novel.1869	-	scaffold0015	22535171	22537173	+	261	-	- && - && -	-
novel.1868	-	scaffold0015	22071469	22088238	+	269	-	- && - && -	-
novel.597	-	scaffold0004	39249019	39254693	-	3739	-	- && - && -	-
novel.596	-	scaffold0004	38849792	38856369	-	337	-	- && - && -	-
novel.595	-	scaffold0004	38616281	38616563	-	283	-	- && - && -	-
novel.594	-	scaffold0004	36607819	36626214	-	1024	-	- && - && -	-
novel.593	-	scaffold0004	35407306	35427202	-	4411	-	- && - && -	-
novel.592	-	scaffold0004	33840577	33846004	-	1751	-	- && - && -	-
novel.591	-	scaffold0004	31986486	31999422	-	226	-	- && - && -	-
novel.590	-	scaffold0004	27753272	27767883	-	268	-	- && - && -	-
novel.269	-	scaffold0002	108624229	108624547	+	319	-	- && - && -	-
novel.268	-	scaffold0002	108384008	108393230	+	1538	-	- && - && -	-
novel.599	-	scaffold0004	42133260	42139600	-	237	-	- && - && -	-
novel.598	-	scaffold0004	40008118	40010688	-	278	-	- && - && -	-
novel.469	-	scaffold0003	48792651	48798677	-	2243	-	- && - && -	-
novel.468	-	scaffold0003	44426629	44451315	-	731	-	- && Q9UIC8.2 RecName: Full=Leucine carboxyl methyltransferase 1; AltName: Full=Protein-leucine O-methyltransferase; AltName: Full=[Phosphatase 2A protein]-leucine-carboxy methyltransferase 1 && -	-
novel.463	-	scaffold0003	34794700	34795359	-	283	-	- && - && -	-
novel.462	-	scaffold0003	27630237	27634388	-	1500	-	- && - && -	-
novel.461	-	scaffold0003	25116505	25121686	-	2350	-	- && - && -	-
novel.460	-	scaffold0003	24862442	24864643	-	2202	-	- && - && -	-
novel.467	-	scaffold0003	44232766	44240900	-	1269	-	- && O00370.1 RecName: Full=LINE-1 retrotransposable element ORF2 protein; Short=ORF2p; Includes: RecName: Full=Reverse transcriptase; Includes: RecName: Full=Endonuclease && -	-
novel.466	-	scaffold0003	41341469	41345815	-	451	-	- && - && -	-
novel.465	-	scaffold0003	40262480	40296319	-	2080	-	- && - && -	-
novel.464	-	scaffold0003	35163213	35166153	-	660	-	- && - && -	-
novel.919	-	scaffold0006	86240434	86244465	-	3328	-	- && - && -	-
novel.918	-	scaffold0006	85653017	85653826	-	672	-	- && - && -	-
novel.913	-	scaffold0006	75549498	75550628	-	311	-	- && - && -	-
novel.912	-	scaffold0006	69534675	69535691	-	253	-	- && - && -	-
novel.911	-	scaffold0006	66730197	66731418	-	1222	-	- && - && -	-
novel.910	-	scaffold0006	65692714	65694879	-	2166	-	- && - && -	-
novel.917	-	scaffold0006	85641371	85641913	-	296	-	- && - && -	-
novel.916	-	scaffold0006	85510045	85513046	-	1877	-	- && - && -	-
novel.915	-	scaffold0006	82977275	82983775	-	3215	-	- && - && -	-
novel.914	-	scaffold0006	78279777	78280872	-	1096	-	- && - && -	-
novel.869	-	scaffold0006	146190175	146192055	+	1073	-	- && - && -	-
novel.868	-	scaffold0006	146099929	146102392	+	1693	-	- && - && -	-
novel.867	-	scaffold0006	145112273	145117266	+	595	-	- && - && -	-
novel.866	-	scaffold0006	140977843	140979557	+	1413	-	- && - && -	-
novel.865	-	scaffold0006	139166801	139197638	+	2470	-	- && - && -	-
novel.864	-	scaffold0006	135987651	136020790	+	6242	-	- && - && -	-
novel.863	-	scaffold0006	134126740	134130950	+	274	-	- && - && -	-
novel.862	-	scaffold0006	132728841	132729092	+	252	-	- && - && -	-
novel.861	-	scaffold0006	129042850	129043113	+	264	-	- && - && -	-
novel.860	-	scaffold0006	119537563	119539007	+	1445	-	- && - && -	-
novel.1074	-	scaffold0007	101429151	101434164	-	893	-	- && - && -	-
novel.1075	-	scaffold0007	103289931	103291037	-	290	-	- && - && -	-
novel.1076	-	scaffold0007	105365726	105368061	-	2336	-	- && - && -	-
novel.1077	-	scaffold0007	105368611	105369831	-	282	-	- && - && -	-
novel.1070	-	scaffold0007	69779447	69786500	-	1061	-	- && - && -	-
novel.1071	-	scaffold0007	70596744	70627541	-	2905	-	- && - && -	-
novel.1072	-	scaffold0007	96252317	96252858	-	415	-	- && - && -	-
novel.1073	-	scaffold0007	97570720	97572596	-	1877	-	- && - && -	-
novel.1078	-	scaffold0007	107659036	107662443	-	3408	-	- && - && -	-
novel.1079	-	scaffold0007	108657908	108658730	-	823	-	- && - && -	-
novel.287	-	scaffold0002	152401156	152429356	+	2214	-	- && - && -	-
novel.1678	-	scaffold0013	7304696	7305847	+	1031	-	- && - && -	-
novel.1679	-	scaffold0013	8490431	8506456	+	1996	-	- && - && -	-
novel.1676	-	scaffold0013	6276031	6284076	+	235	-	- && - && -	-
novel.1677	-	scaffold0013	6446421	6451966	+	772	-	- && - && -	-
novel.1674	-	scaffold0013	6055197	6062394	+	3307	-	- && - && -	-
novel.1675	-	scaffold0013	6204148	6205313	+	246	-	- && - && -	-
novel.1672	-	scaffold0013	4792666	4796328	+	3663	-	- && - && -	-
novel.1673	-	scaffold0013	5418041	5427203	+	659	-	- && - && -	-
novel.1670	-	scaffold0013	3976240	3977620	+	312	-	- && - && -	-
novel.1671	-	scaffold0013	4662042	4662729	+	688	-	- && - && -	-
novel.284	-	scaffold0002	143799149	143799388	+	240	-	- && - && -	-
novel.283	-	scaffold0002	142309227	142310631	+	229	-	- && - && -	-
novel.282	-	scaffold0002	136586707	136588389	+	1151	-	- && - && -	-
novel.281	-	scaffold0002	135924545	135928568	+	801	-	- && - && -	-
novel.128	-	scaffold0001	53767335	53782785	-	1542	-	- && - && -	-
novel.129	-	scaffold0001	55231696	55232803	-	595	-	- && - && -	-
novel.126	-	scaffold0001	46157933	46180688	-	294	-	- && - && -	-
novel.127	-	scaffold0001	51812028	51813742	-	209	-	- && - && -	-
novel.124	-	scaffold0001	44537413	44539249	-	1191	-	- && - && -	-
novel.125	-	scaffold0001	45182468	45186653	-	1539	-	- && - && -	-
novel.122	-	scaffold0001	31488824	31490160	-	244	-	- && P11369.2 RecName: Full=LINE-1 retrotransposable element ORF2 protein; Short=ORF2p; AltName: Full=Long interspersed element-1; Short=L1; AltName: Full=Retrovirus-related Pol polyprotein LINE-1; Includes: RecName: Full=Reverse transcriptase; Includes:	-
novel.123	-	scaffold0001	41438066	41439788	-	241	-	- && - && -	-
novel.120	-	scaffold0001	25374026	25376501	-	627	-	- && - && -	-
novel.121	-	scaffold0001	30715563	30729926	-	1489	-	- && - && -	-
novel.1492	-	scaffold0010	142077604	142080696	-	286	-	- && - && -	-
novel.1493	-	scaffold0010	142128451	142129827	-	558	-	- && - && -	-
novel.1490	-	scaffold0010	139442346	139444255	-	707	-	- && - && -	-
novel.1491	-	scaffold0010	139517444	139519678	-	247	-	- && - && -	-
novel.1496	-	scaffold0011	582318	586011	+	1262	-	- && - && -	-
novel.1497	-	scaffold0011	1024074	1025160	+	1087	-	- && - && -	-
novel.1494	-	scaffold0010	142136950	142145364	-	1035	-	- && - && -	-
novel.1495	-	scaffold0010	144654166	144658329	-	1006	-	- && - && -	-
novel.1498	-	scaffold0011	1576518	1577448	+	279	-	- && - && -	-
novel.1499	-	scaffold0011	3113172	3115803	+	812	-	- && - && -	-
novel.1702	-	scaffold0013	67427120	67430462	+	2489	-	- && - && -	-
novel.1703	-	scaffold0013	67662856	67663528	+	673	-	- && - && -	-
novel.1700	-	scaffold0013	66448456	66453297	+	579	-	- && - && -	-
novel.1701	-	scaffold0013	67344396	67350350	+	564	-	- && - && -	-
novel.1706	-	scaffold0013	86491861	86542734	+	1718	-	- && - && -	-
novel.1259	-	scaffold0009	12234636	12235274	+	274	-	- && - && -	-
novel.1704	-	scaffold0013	81768974	81775822	+	491	-	- && - && -	-
novel.1705	-	scaffold0013	84103392	84105958	+	1030	-	- && - && -	-
novel.1254	-	scaffold0009	3990519	3992592	+	1593	-	- && - && -	-
novel.1255	-	scaffold0009	4535912	4545663	+	614	-	- && - && -	-
novel.1708	-	scaffold0013	88968983	88978878	+	893	-	- && - && -	-
novel.1257	-	scaffold0009	8057132	8109706	+	2982	-	- && - && -	-
novel.1250	-	scaffold0009	2052458	2070159	+	470	-	- && - && -	-
novel.1251	-	scaffold0009	2473659	2474435	+	475	-	- && - && -	-
novel.1252	-	scaffold0009	2517624	2530582	+	279	-	- && - && -	-
novel.1253	-	scaffold0009	3721005	3740941	+	1781	-	- && - && -	-
novel.694	-	scaffold0005	81008695	81017536	+	6176	-	- && - && -	-
novel.695	-	scaffold0005	83843033	83848808	+	1297	-	- && - && -	-
novel.696	-	scaffold0005	85398226	85400772	+	1231	-	- && - && -	-
novel.697	-	scaffold0005	90404650	90405293	+	390	-	- && - && -	-
novel.690	-	scaffold0005	68112619	68113621	+	1003	-	- && - && -	-
novel.691	-	scaffold0005	75994918	75995316	+	227	-	- && - && -	-
novel.692	-	scaffold0005	77702185	77870595	+	7587	-	- && - && -	-
novel.693	-	scaffold0005	79482017	79506961	+	2071	-	- && O00370.1 RecName: Full=LINE-1 retrotransposable element ORF2 protein; Short=ORF2p; Includes: RecName: Full=Reverse transcriptase; Includes: RecName: Full=Endonuclease && -	-
novel.698	-	scaffold0005	91297511	91298153	+	643	-	- && - && -	-
novel.699	-	scaffold0005	91660385	91663566	+	498	-	- && - && -	-
novel.1388	-	scaffold0010	4482460	4489994	+	5193	-	- && - && -	-
novel.1389	-	scaffold0010	4502832	4503513	+	471	-	- && - && -	-
novel.1386	-	scaffold0010	2229709	2231514	+	385	-	- && - && -	-
novel.1387	-	scaffold0010	4201407	4213762	+	377	-	- && - && -	-
novel.1384	-	scaffold0009	147986907	147987327	-	318	-	- && P01764.2 RecName: Full=Immunoglobulin heavy variable 3-23; AltName: Full=Ig heavy chain V-III region LAY; AltName: Full=Ig heavy chain V-III region POM; AltName: Full=Ig heavy chain V-III region TEI; AltName: Full=Ig heavy chain V-III region TIL; Alt	-
novel.1385	-	scaffold0010	865266	867123	+	1527	-	- && O00370.1 RecName: Full=LINE-1 retrotransposable element ORF2 protein; Short=ORF2p; Includes: RecName: Full=Reverse transcriptase; Includes: RecName: Full=Endonuclease && -	-
novel.1382	-	scaffold0009	147465616	147466171	-	475	-	- && P01825.2 RecName: Full=Immunoglobulin heavy variable 4-59; AltName: Full=Ig heavy chain V-II region NEWM; Flags: Precursor && -	-
novel.1383	-	scaffold0009	147959805	147960316	-	409	-	- && P01762.2 RecName: Full=Immunoglobulin heavy variable 3-11; AltName: Full=Ig heavy chain V-III region TRO; Flags: Precursor && -	-
novel.1380	-	scaffold0009	146026895	146030299	-	1611	-	- && - && -	-
novel.1381	-	scaffold0009	146761860	146763702	-	1843	-	- && - && -	-
novel.678	-	scaffold0005	12176227	12182760	+	2338	-	- && - && -	-
novel.679	-	scaffold0005	12406724	12409593	+	280	-	- && - && -	-
novel.672	-	scaffold0005	1289782	1299502	+	1908	-	- && - && PF14672:Late cornified envelope	-
novel.673	-	scaffold0005	1482178	1488437	+	4280	-	- && P11369.2 RecName: Full=LINE-1 retrotransposable element ORF2 protein; Short=ORF2p; AltName: Full=Long interspersed element-1; Short=L1; AltName: Full=Retrovirus-related Pol polyprotein LINE-1; Includes: RecName: Full=Reverse transcriptase; Includes:	-
novel.670	-	scaffold0004	208770295	208772152	-	1651	-	- && - && -	-
novel.671	-	scaffold0005	1228553	1241565	+	1320	-	- && - && -	-
novel.676	-	scaffold0005	4517508	4586169	+	879	-	- && - && -	-
novel.677	-	scaffold0005	8648892	8738114	+	255	-	- && - && -	-
novel.674	-	scaffold0005	1905246	1912557	+	1999	-	- && O00370.1 RecName: Full=LINE-1 retrotransposable element ORF2 protein; Short=ORF2p; Includes: RecName: Full=Reverse transcriptase; Includes: RecName: Full=Endonuclease && -	-
novel.675	-	scaffold0005	3885880	3889332	+	807	-	- && - && -	-
novel.1816	-	scaffold0014	13088285	13143151	-	1835	-	- && - && -	-
novel.1817	-	scaffold0014	13975951	14016245	-	965	-	- && - && -	-
novel.1814	-	scaffold0014	11422880	11426340	-	558	-	- && - && -	-
novel.1815	-	scaffold0014	13082818	13088198	-	5381	-	- && P11369.2 RecName: Full=LINE-1 retrotransposable element ORF2 protein; Short=ORF2p; AltName: Full=Long interspersed element-1; Short=L1; AltName: Full=Retrovirus-related Pol polyprotein LINE-1; Includes: RecName: Full=Reverse transcriptase; Includes:	-
novel.1812	-	scaffold0014	10081092	10084493	-	1648	-	- && - && -	-
novel.1813	-	scaffold0014	11399783	11400493	-	256	-	- && - && -	-
novel.1810	-	scaffold0014	1655005	1655745	-	271	-	- && - && -	-
novel.1811	-	scaffold0014	4274943	4277999	-	1272	-	- && - && -	-
novel.580	-	scaffold0004	206744253	206752894	+	6741	-	- && - && -	-
novel.581	-	scaffold0004	208725237	208732157	+	735	-	- && - && -	-
novel.582	-	scaffold0004	7544787	7609813	-	895	-	- && - && -	-
novel.583	-	scaffold0004	8963785	8964136	-	238	-	- && - && -	-
novel.584	-	scaffold0004	13387883	13390537	-	370	-	- && - && -	-
novel.585	-	scaffold0004	22893806	22918793	-	1840	-	- && Q9Y2Z9.2 RecName: Full=Ubiquinone biosynthesis monooxygenase COQ6, mitochondrial; AltName: Full=Coenzyme Q10 monooxygenase 6; Flags: Precursor && -	-
novel.1818	-	scaffold0014	15461877	15467341	-	5465	-	- && Q9UN81.1 RecName: Full=LINE-1 retrotransposable element ORF1 protein; Short=L1ORF1p; AltName: Full=LINE retrotransposable element 1; AltName: Full=LINE1 retrotransposable element 1 && -	-
novel.587	-	scaffold0004	26348390	26348774	-	279	-	- && - && -	-
novel.276	-	scaffold0002	119444856	119445737	+	882	-	- && - && -	-
novel.277	-	scaffold0002	128146071	128147381	+	820	-	- && - && -	-
novel.274	-	scaffold0002	111747901	111898763	+	7035	-	- && Q6ZUI0.1 RecName: Full=Tumor protein p63-regulated gene 1 protein; AltName: Full=Protein FAM79B && -	-
novel.275	-	scaffold0002	113104225	113106143	+	1073	-	- && - && -	-
novel.272	-	scaffold0002	110696587	110716142	+	6694	-	- && O00370.1 RecName: Full=LINE-1 retrotransposable element ORF2 protein; Short=ORF2p; Includes: RecName: Full=Reverse transcriptase; Includes: RecName: Full=Endonuclease && -	-
novel.273	-	scaffold0002	111663725	111733415	+	5682	-	- && O00370.1 RecName: Full=LINE-1 retrotransposable element ORF2 protein; Short=ORF2p; Includes: RecName: Full=Reverse transcriptase; Includes: RecName: Full=Endonuclease && -	-
novel.270	-	scaffold0002	109718543	109719526	+	536	-	- && - && -	-
novel.271	-	scaffold0002	110430219	110440048	+	2535	-	- && - && -	-
novel.278	-	scaffold0002	128174706	128175882	+	1177	-	- && - && -	-
novel.279	-	scaffold0002	131389107	131416619	+	2417	-	- && - && -	-
novel.546	-	scaffold0004	104560996	104569981	+	2283	-	- && - && -	-
novel.1928	-	scaffold0015	40409491	40421093	-	4953	-	- && - && -	-
novel.1929	-	scaffold0016	4323120	4325211	+	2092	-	- && - && -	-
novel.519	-	scaffold0004	34058011	34067127	+	1433	-	- && - && -	-
novel.1922	-	scaffold0015	32540653	32541121	-	469	-	- && - && -	-
novel.1923	-	scaffold0015	33833862	33843039	-	9107	-	- && - && -	-
novel.1920	-	scaffold0015	29456529	29459150	-	1218	-	- && - && -	-
novel.1921	-	scaffold0015	31009896	31023567	-	485	-	- && - && -	-
novel.1926	-	scaffold0015	35281795	35302056	-	914	-	- && - && -	-
novel.1927	-	scaffold0015	40266837	40268880	-	1876	-	- && - && -	-
novel.1924	-	scaffold0015	33937666	33940161	-	1662	-	- && - && -	-
novel.1925	-	scaffold0015	34467800	34473406	-	1175	-	- && - && -	-
novel.478	-	scaffold0003	74240145	74242211	-	1563	-	- && - && -	-
novel.479	-	scaffold0003	84918019	85009288	-	311	-	- && - && -	-
novel.474	-	scaffold0003	66197916	66203420	-	856	-	- && - && -	-
novel.475	-	scaffold0003	67974823	68050135	-	366	-	- && - && -	-
novel.476	-	scaffold0003	72824017	72828255	-	388	-	- && - && -	-
novel.477	-	scaffold0003	73574676	73582465	-	4698	-	- && - && -	-
novel.470	-	scaffold0003	56710247	56733200	-	963	-	- && - && -	-
novel.471	-	scaffold0003	64451892	64477815	-	256	-	- && - && -	-
novel.472	-	scaffold0003	65367641	65371353	-	1754	-	- && - && -	-
novel.473	-	scaffold0003	65470660	65471005	-	346	-	- && - && -	-
novel.1131	-	scaffold0008	24628054	24630162	+	692	-	- && - && -	-
novel.1130	-	scaffold0008	21642275	21650065	+	754	-	- && - && -	-
novel.1133	-	scaffold0008	25941191	25942003	+	369	-	- && - && -	-
novel.1132	-	scaffold0008	25160953	25176304	+	2657	-	- && - && -	-
novel.1135	-	scaffold0008	29007730	29012964	+	478	-	- && - && -	-
novel.1642	-	scaffold0012	1320036	1324539	-	605	-	- && - && -	-
novel.1137	-	scaffold0008	32045342	32048527	+	483	-	- && - && -	-
novel.1136	-	scaffold0008	29349205	29363367	+	263	-	- && - && -	-
novel.908	-	scaffold0006	50938686	50939677	-	731	-	- && - && -	-
novel.909	-	scaffold0006	51061931	51066060	-	1145	-	- && - && -	-
novel.904	-	scaffold0006	41973602	41980415	-	4076	-	- && - && -	-
novel.905	-	scaffold0006	45315089	45316314	-	252	-	- && - && -	-
novel.906	-	scaffold0006	47507887	47508334	-	448	-	- && - && -	-
novel.907	-	scaffold0006	50936649	50938518	-	1870	-	- && - && -	-
novel.900	-	scaffold0006	33363846	33428530	-	5234	-	- && - && -	-
novel.901	-	scaffold0006	33486074	33503872	-	2073	-	- && - && -	-
novel.902	-	scaffold0006	36228650	36237056	-	1491	-	- && - && -	-
novel.903	-	scaffold0006	40854909	40860518	-	903	-	- && - && -	-
novel.870	-	scaffold0006	147291358	147296718	+	4884	-	- && - && -	-
novel.871	-	scaffold0006	149061913	149062548	+	540	-	- && - && -	-
novel.872	-	scaffold0006	149621993	149632004	+	809	-	- && - && -	-
novel.873	-	scaffold0006	152656013	152659042	+	847	-	- && - && -	-
novel.874	-	scaffold0006	153196134	153206994	+	275	-	- && - && -	-
novel.875	-	scaffold0006	168005956	168014377	+	527	-	- && - && -	-
novel.876	-	scaffold0006	168709985	168716864	+	273	-	- && - && -	-
novel.877	-	scaffold0006	168726877	168729832	+	653	-	- && - && -	-
novel.878	-	scaffold0006	172833757	172834366	+	527	-	- && - && -	-
novel.879	-	scaffold0006	173139348	173141911	+	2534	-	- && - && -	-
novel.351	-	scaffold0002	75185412	75186100	-	689	-	- && - && -	-
novel.350	-	scaffold0002	72918456	72919060	-	605	-	- && P11369.2 RecName: Full=LINE-1 retrotransposable element ORF2 protein; Short=ORF2p; AltName: Full=Long interspersed element-1; Short=L1; AltName: Full=Retrovirus-related Pol polyprotein LINE-1; Includes: RecName: Full=Reverse transcriptase; Includes:	-
novel.601	-	scaffold0004	53705595	53706254	-	248	-	- && - && -	-
novel.600	-	scaffold0004	46658828	46660537	-	1029	-	- && - && -	-
novel.355	-	scaffold0002	79150764	79151090	-	327	-	- && - && -	-
novel.606	-	scaffold0004	70169694	70171681	-	645	-	- && - && -	-
novel.605	-	scaffold0004	70015360	70030579	-	2242	-	- && - && -	-
novel.604	-	scaffold0004	68879947	68951605	-	3087	-	- && - && -	-
novel.1669	-	scaffold0013	3266335	3271303	+	2162	-	- && - && -	-
novel.1668	-	scaffold0013	3215887	3216660	+	591	-	- && - && -	-
novel.1665	-	scaffold0013	753930	755285	+	841	-	- && - && -	-
novel.1664	-	scaffold0013	616782	619467	+	2197	-	- && - && -	-
novel.1667	-	scaffold0013	2834155	2836030	+	964	-	- && - && -	-
novel.1666	-	scaffold0013	2111239	2111808	+	570	-	- && - && -	-
novel.1661	-	scaffold0012	119609696	119612561	-	373	-	- && - && -	-
novel.1660	-	scaffold0012	103564275	103565044	-	770	-	- && Q6ZQK5.2 RecName: Full=Arf-GAP with coiled-coil, ANK repeat and PH domain-containing protein 2; AltName: Full=Centaurin-beta-2; Short=Cnt-b2 && -	-
novel.1663	-	scaffold0012	120685639	120690719	-	213	-	- && - && -	-
novel.1662	-	scaffold0012	120647947	120652591	-	321	-	- && - && -	-
novel.113	-	scaffold0001	9509307	9510527	-	964	-	- && - && -	-
novel.112	-	scaffold0001	7785525	7795869	-	573	-	- && - && -	-
novel.111	-	scaffold0001	5419897	5420187	-	255	-	- && - && -	-
novel.110	-	scaffold0001	2859733	2863977	-	3627	-	- && - && -	-
novel.117	-	scaffold0001	15603805	15613879	-	251	-	- && - && -	-
novel.116	-	scaffold0001	15381508	15415081	-	2342	-	- && - && -	-
novel.115	-	scaffold0001	10836523	10840340	-	284	-	- && - && -	-
novel.114	-	scaffold0001	10309998	10311726	-	221	-	- && - && -	-
novel.119	-	scaffold0001	21315977	21336246	-	721	-	- && - && -	-
novel.118	-	scaffold0001	17127481	17145347	-	381	-	- && - && -	-
novel.1069	-	scaffold0007	68695878	68704962	-	431	-	- && - && -	-
novel.1068	-	scaffold0007	66929776	66930302	-	206	-	- && - && -	-
novel.1063	-	scaffold0007	55119020	55130095	-	259	-	- && - && -	-
novel.1062	-	scaffold0007	53303596	53309428	-	1051	-	- && - && -	-
novel.1061	-	scaffold0007	52965461	52968852	-	1964	-	- && - && -	-
novel.1060	-	scaffold0007	51440701	51452020	-	207	-	- && - && -	-
novel.1067	-	scaffold0007	66242787	66244081	-	269	-	- && - && -	-
novel.1066	-	scaffold0007	61708526	61709804	-	1279	-	- && Q8R3L8.3 RecName: Full=Cyclin-dependent kinase 8; AltName: Full=Cell division protein kinase 8; AltName: Full=Mediator complex subunit CDK8; AltName: Full=Mediator of RNA polymerase II transcription subunit CDK8 && -	-
novel.1065	-	scaffold0007	57197987	57201266	-	526	-	- && - && -	-
novel.1064	-	scaffold0007	56193544	56198988	-	5414	-	- && - && -	-
novel.1481	-	scaffold0010	119456152	119493545	-	937	-	- && - && -	-
novel.1480	-	scaffold0010	118325338	118327627	-	602	-	- && - && -	-
novel.1483	-	scaffold0010	126084412	126093330	-	2632	-	- && - && -	-
novel.1482	-	scaffold0010	122518517	122622402	-	229	-	- && - && -	-
novel.1485	-	scaffold0010	129325236	129326789	-	282	-	- && - && -	-
novel.1484	-	scaffold0010	126263470	126263798	-	329	-	- && - && -	-
novel.1487	-	scaffold0010	133396555	133397714	-	939	-	- && - && -	-
novel.1486	-	scaffold0010	130288623	130305766	-	1498	-	- && Q32P51.2 RecName: Full=Heterogeneous nuclear ribonucleoprotein A1-like 2; Short=hnRNP A1-like 2; AltName: Full=hnRNP core protein A1-like 2 && -	-
novel.1489	-	scaffold0010	137388548	137389826	-	548	-	- && - && -	-
novel.1488	-	scaffold0010	136566709	136574468	-	638	-	- && - && -	-
novel.1243	-	scaffold0008	145614049	145618684	-	668	-	- && - && -	-
novel.1242	-	scaffold0008	144625684	144629038	-	602	-	- && - && -	-
novel.1241	-	scaffold0008	143929833	143938318	-	1633	-	- && - && -	-
novel.1240	-	scaffold0008	139320292	139331898	-	2170	-	- && - && -	-
novel.1247	-	scaffold0008	148865314	148870471	-	5158	-	- && - && -	-
novel.1246	-	scaffold0008	148518468	148519887	-	819	-	- && - && -	-
novel.1245	-	scaffold0008	148177204	148178878	-	693	-	- && - && -	-
novel.1244	-	scaffold0008	147090137	147094463	-	4120	-	- && - && -	-
novel.1719	-	scaffold0013	1877183	1877958	-	364	-	- && - && -	-
novel.1718	-	scaffold0013	1876647	1876947	-	301	-	- && - && -	-
novel.1249	-	scaffold0009	1979081	2023504	+	502	-	- && - && -	-
novel.1248	-	scaffold0009	1956531	1960869	+	2490	-	- && - && -	-
novel.1006	-	scaffold0007	113272806	113274560	+	811	-	- && - && -	-
novel.1399	-	scaffold0010	51825318	51826829	+	1512	-	- && - && -	-
novel.1398	-	scaffold0010	51684897	51687261	+	957	-	- && - && -	-
novel.1395	-	scaffold0010	42023970	42027348	+	1105	-	- && - && -	-
novel.1394	-	scaffold0010	41007641	41010249	+	303	-	- && - && -	-
novel.1397	-	scaffold0010	50995674	50996933	+	527	-	- && - && -	-
novel.1396	-	scaffold0010	50682221	50797989	+	1630	-	- && - && -	-
novel.1391	-	scaffold0010	17901502	17996516	+	247	-	- && - && -	-
novel.1390	-	scaffold0010	11807670	11821450	+	1271	-	- && - && -	-
novel.1393	-	scaffold0010	40615156	40618257	+	3102	-	- && - && -	-
novel.1392	-	scaffold0010	32622436	32623835	+	353	-	- && - && -	-
novel.649	-	scaffold0004	183015997	183016704	-	342	-	- && P80748.2 RecName: Full=Immunoglobulin lambda variable 3-21; AltName: Full=Ig lambda chain V-III region LOI; AltName: Full=Ig lambda chain V-V region DEL; AltName: Full=Ig lambda chain V-VII region MOT; Flags: Precursor && -	-
novel.648	-	scaffold0004	182813453	182813763	-	207	-	- && P13373.1 RecName: Full=Immunoglobulin omega chain; AltName: Full=Protein VPreB2; Flags: Precursor && -	-
novel.647	-	scaffold0004	182756934	182757420	-	383	-	- && P13373.1 RecName: Full=Immunoglobulin omega chain; AltName: Full=Protein VPreB2; Flags: Precursor && -	-
novel.646	-	scaffold0004	181450295	181493160	-	13193	-	- && - && -	-
novel.645	-	scaffold0004	181244172	181247634	-	2669	-	- && - && -	-
novel.644	-	scaffold0004	177887967	177897371	-	9405	-	- && P03355.4 RecName: Full=Gag-Pol polyprotein; Short=Pr180gag-pol; Contains: RecName: Full=Matrix protein p15; Short=MA; Contains: RecName: Full=RNA-binding phosphoprotein p12; AltName: Full=pp12; Contains: RecName: Full=Capsid protein p30; Short=CA; Co	Gag_p30
novel.643	-	scaffold0004	175787056	175812008	-	831	-	- && - && -	-
novel.642	-	scaffold0004	171201321	171206528	-	262	-	- && - && -	-
novel.641	-	scaffold0004	164011907	164012862	-	820	-	- && - && -	-
novel.640	-	scaffold0004	163994606	164020308	-	938	-	- && - && -	-
novel.1805	-	scaffold0014	48954120	48958264	+	1951	-	- && - && -	-
novel.1804	-	scaffold0014	47704592	47706679	+	974	-	- && Q9XS72.1 RecName: Full=T-cell surface glycoprotein CD1a; AltName: CD_antigen=CD1a; Flags: Precursor && -	-
novel.249	-	scaffold0002	52691303	52719490	+	1714	-	- && - && -	-
novel.248	-	scaffold0002	50060546	50083965	+	232	-	- && - && -	-
novel.1801	-	scaffold0014	46566125	46571488	+	2345	-	- && - && -	-
novel.1800	-	scaffold0014	46237082	46239877	+	303	-	- && - && -	-
novel.1803	-	scaffold0014	47029436	47030602	+	325	-	- && - && -	-
novel.1802	-	scaffold0014	46964330	46977228	+	419	-	- && - && -	-
novel.243	-	scaffold0002	26717628	26730356	+	220	-	- && - && -	-
novel.242	-	scaffold0002	26235557	26251041	+	338	-	- && - && -	-
novel.241	-	scaffold0002	15193697	15197121	+	3425	-	- && - && -	-
novel.240	-	scaffold0002	14000700	14001202	+	385	-	- && - && -	-
novel.247	-	scaffold0002	40448033	40473989	+	406	-	- && - && -	-
novel.246	-	scaffold0002	27799700	27800068	+	297	-	- && - && -	-
novel.245	-	scaffold0002	27707238	27718909	+	567	-	- && - && -	-
novel.244	-	scaffold0002	27167569	27168454	+	340	-	- && - && -	-
novel.553	-	scaffold0004	130105316	130105601	+	286	-	- && - && -	-
novel.1939	-	scaffold0081	248949	256365	-	366	-	- && - && -	-
novel.1938	-	scaffold0028	45965	48729	+	1698	-	- && Q3L6W7.1 RecName: Full=Cytochrome c oxidase subunit 2; AltName: Full=Cytochrome c oxidase polypeptide II && PF00115:Cytochrome C and Quinol oxidase polypeptide I|PF02790:Cytochrome C oxidase subunit II, transmembrane domain	-
novel.1931	-	scaffold0016	1622896	1625759	-	1755	-	- && P31789.1 RecName: Full=Envelope glycoprotein; AltName: Full=Env polyprotein; Contains: RecName: Full=Surface protein; Short=SU; Contains: RecName: Full=Transmembrane protein; Short=TM; Flags: Precursor [Mouse Intracisternal A-particle] && PF00517:Ret	-
novel.1930	-	scaffold0016	1348559	1361690	-	2034	-	- && - && -	-
novel.1933	-	scaffold0021	1151046	1153541	-	2304	-	- && Q96MW7.1 RecName: Full=Tigger transposable element-derived protein 1 && -	-
novel.1932	-	scaffold0016	2516218	2635194	-	388	-	- && - && -	-
novel.1935	-	scaffold0025	747795	748969	+	1175	-	- && - && -	-
novel.1934	-	scaffold0022	526492	526751	-	260	-	- && - && -	-
novel.1937	-	scaffold0027	591797	596317	+	3567	-	- && Q8N3L3.3 RecName: Full=Beta-taxilin; AltName: Full=Muscle-derived protein 77; Short=hMDP77 && PF09728:Myosin-like coiled-coil protein	-
novel.1936	-	scaffold0025	749346	760502	-	1584	-	- && Q8TGM7.1 RecName: Full=Putative uncharacterized protein ART2; AltName: Full=Antisense to ribosomal RNA transcript protein 2 && -	-
novel.481	-	scaffold0003	88566570	88617756	-	3511	-	- && - && -	-
novel.480	-	scaffold0003	87963248	87983703	-	606	-	- && - && -	-
novel.483	-	scaffold0003	108111109	108132353	-	1660	-	- && - && -	-
novel.482	-	scaffold0003	104620370	104625083	-	262	-	- && - && -	-
novel.485	-	scaffold0003	126598666	126600841	-	2036	-	- && - && -	-
novel.484	-	scaffold0003	122868269	122871424	-	1667	-	- && Q8WVX3.2 RecName: Full=Uncharacterized protein C4orf3; AltName: Full=Hepatitis C virus F protein-transactivated protein 1; Short=HCV F-transactivated protein 1 && -	-
novel.487	-	scaffold0003	130602128	130604701	-	230	-	- && - && -	-
novel.486	-	scaffold0003	126631483	126633355	-	342	-	- && - && -	-
novel.489	-	scaffold0003	141297371	141300006	-	322	-	- && - && -	-
novel.1636	-	scaffold0012	93769814	93781414	+	1747	-	- && - && -	-
novel.1637	-	scaffold0012	94601979	94609031	+	417	-	- && - && -	-
novel.1638	-	scaffold0012	111653059	111653420	+	362	-	- && - && -	-
novel.1639	-	scaffold0012	114157694	114164720	+	834	-	- && - && -	-
novel.550	-	scaffold0004	119176909	119189168	+	3573	-	- && - && -	-
novel.390	-	scaffold0002	191240802	191242558	-	1693	-	- && - && -	-
novel.285	-	scaffold0002	145020406	145022224	+	1287	-	- && - && -	-
novel.556	-	scaffold0004	140224732	140236998	+	214	-	- && - && -	-
novel.805	-	scaffold0005	116758408	116758657	-	250	-	- && - && -	-
novel.804	-	scaffold0005	114224887	114247637	-	214	-	- && - && -	-
novel.807	-	scaffold0005	124683768	124690113	-	2561	-	- && Q6A051.2 RecName: Full=Attractin-like protein 1; Flags: Precursor && -	-
novel.806	-	scaffold0005	123588390	123591826	-	3437	-	- && - && -	-
novel.801	-	scaffold0005	109547499	109552371	-	1538	-	- && - && -	-
novel.800	-	scaffold0005	109323510	109330147	-	3456	-	- && - && -	-
novel.803	-	scaffold0005	111128098	111131650	-	3447	-	- && - && -	-
novel.802	-	scaffold0005	109620857	109635075	-	3494	-	- && - && -	-
novel.809	-	scaffold0005	129615477	129618388	-	2403	-	- && - && -	-
novel.808	-	scaffold0005	126902038	126906494	-	1870	-	- && - && -	-
novel.1122	-	scaffold0007	176020556	176021413	-	829	-	- && - && -	-
novel.1651	-	scaffold0012	40226135	40236957	-	306	-	- && - && -	-
novel.1652	-	scaffold0012	66561137	66567611	-	6475	-	- && - && -	-
novel.1653	-	scaffold0012	68279408	68363622	-	1400	-	- && - && -	-
novel.1654	-	scaffold0012	74036975	74040405	-	3348	-	- && Q35113.2 RecName: Full=Cytochrome b; AltName: Full=Complex III subunit 3; AltName: Full=Complex III subunit III; AltName: Full=Cytochrome b-c1 complex subunit 3; AltName: Full=Ubiquinol-cytochrome-c reductase complex cytochrome b subunit && PF06455:N	-
novel.1655	-	scaffold0012	76019653	76038202	-	4684	-	- && P08548.1 RecName: Full=LINE-1 reverse transcriptase homolog && -	-
novel.1656	-	scaffold0012	79766523	79787546	-	736	-	- && P11369.2 RecName: Full=LINE-1 retrotransposable element ORF2 protein; Short=ORF2p; AltName: Full=Long interspersed element-1; Short=L1; AltName: Full=Retrovirus-related Pol polyprotein LINE-1; Includes: RecName: Full=Reverse transcriptase; Includes:	-
novel.1657	-	scaffold0012	88157811	88163653	-	811	-	- && - && -	-
novel.1658	-	scaffold0012	90286725	90297734	-	850	-	- && - && -	-
novel.1659	-	scaffold0012	94185573	94200027	-	1015	-	- && - && -	-
novel.1128	-	scaffold0008	8943647	8946345	+	2117	-	- && - && -	-
novel.1129	-	scaffold0008	9736576	9739432	+	526	-	- && - && -	-
novel.104	-	scaffold0001	282970529	282971505	+	230	-	- && - && -	-
novel.105	-	scaffold0001	286616979	286662720	+	267	-	- && - && -	-
novel.106	-	scaffold0001	288739991	288748774	+	371	-	- && - && -	-
novel.107	-	scaffold0001	309385057	309416021	+	2620	-	- && - && -	-
novel.100	-	scaffold0001	279766853	279767530	+	415	-	- && - && -	-
novel.101	-	scaffold0001	280837991	280917195	+	4301	-	- && O00370.1 RecName: Full=LINE-1 retrotransposable element ORF2 protein; Short=ORF2p; Includes: RecName: Full=Reverse transcriptase; Includes: RecName: Full=Endonuclease && -	-
novel.102	-	scaffold0001	282120575	282121472	+	371	-	- && - && -	-
novel.103	-	scaffold0001	282532178	282763137	+	5576	-	- && - && -	-
novel.108	-	scaffold0001	312073575	312079013	+	5439	-	- && - && -	-
novel.109	-	scaffold0001	313689369	313691960	+	1640	-	- && - && -	-
novel.1018	-	scaffold0007	127427597	127431513	+	972	-	- && P11369.2 RecName: Full=LINE-1 retrotransposable element ORF2 protein; Short=ORF2p; AltName: Full=Long interspersed element-1; Short=L1; AltName: Full=Retrovirus-related Pol polyprotein LINE-1; Includes: RecName: Full=Reverse transcriptase; Includes:	-
novel.1019	-	scaffold0007	127541335	127545609	+	4275	-	- && - && -	-
novel.1016	-	scaffold0007	124609767	124618012	+	560	-	- && - && -	-
novel.1017	-	scaffold0007	126130894	126131318	+	425	-	- && P11369.2 RecName: Full=LINE-1 retrotransposable element ORF2 protein; Short=ORF2p; AltName: Full=Long interspersed element-1; Short=L1; AltName: Full=Retrovirus-related Pol polyprotein LINE-1; Includes: RecName: Full=Reverse transcriptase; Includes:	-
novel.1014	-	scaffold0007	121763475	121767324	+	722	-	- && - && -	-
novel.1015	-	scaffold0007	122868991	122873697	+	757	-	- && - && -	-
novel.1012	-	scaffold0007	118530473	118533364	+	1343	-	- && - && -	-
novel.1013	-	scaffold0007	119404626	119452323	+	796	-	- && - && -	-
novel.1010	-	scaffold0007	116847993	116852623	+	4108	-	- && P04026.1 RecName: Full=Putative Pol polyprotein; Contains: RecName: Full=Reverse transcriptase/ribonuclease H; Short=RT; Contains: RecName: Full=Integrase; Short=IN [Golden hamster intracisternal A-particle H18] && PF02022:Integrase Zinc binding doma	rve
novel.1011	-	scaffold0007	117412710	117433683	+	6330	-	- && O00370.1 RecName: Full=LINE-1 retrotransposable element ORF2 protein; Short=ORF2p; Includes: RecName: Full=Reverse transcriptase; Includes: RecName: Full=Endonuclease && PF00096:Zinc finger, C2H2 type|PF01352:KRAB box	KRAB
novel.1724	-	scaffold0013	4798696	4800343	-	354	-	- && - && -	-
novel.1725	-	scaffold0013	6061812	6062554	-	718	-	- && - && -	-
novel.1726	-	scaffold0013	7158642	7162614	-	2375	-	- && - && -	-
novel.1727	-	scaffold0013	7125692	7126622	-	487	-	- && - && -	-
novel.1720	-	scaffold0013	3155656	3156329	-	674	-	- && - && -	-
novel.1721	-	scaffold0013	3231279	3232014	-	736	-	- && - && -	-
novel.1722	-	scaffold0013	3291726	3293481	-	1641	-	- && - && -	-
novel.1723	-	scaffold0013	3394546	3398016	-	1207	-	- && - && -	-
novel.1728	-	scaffold0013	8383205	8386093	-	330	-	- && - && -	-
novel.1729	-	scaffold0013	10679963	10689718	-	3018	-	- && - && -	-
novel.1238	-	scaffold0008	122357865	122359685	-	448	-	- && - && -	-
novel.1239	-	scaffold0008	135759506	135777445	-	1123	-	- && - && -	-
novel.1352	-	scaffold0009	75750342	75758869	-	3794	-	- && - && -	-
novel.1355	-	scaffold0009	99062572	99068632	-	784	-	- && - && -	-
novel.1354	-	scaffold0009	86019243	86019552	-	310	-	- && - && -	-
novel.1357	-	scaffold0009	100053495	100065652	-	678	-	- && - && -	-
novel.223	-	scaffold0002	1377449	1379393	+	1090	-	- && - && -	-
novel.1356	-	scaffold0009	99257463	99268486	-	969	-	- && - && -	-
novel.650	-	scaffold0004	183079961	183080483	-	366	-	- && P01717.2 RecName: Full=Immunoglobulin lambda variable 3-25; AltName: Full=Ig lambda chain V-IV region Hil; Flags: Precursor && -	-
novel.651	-	scaffold0004	183116352	183117071	-	345	-	- && P80748.2 RecName: Full=Immunoglobulin lambda variable 3-21; AltName: Full=Ig lambda chain V-III region LOI; AltName: Full=Ig lambda chain V-V region DEL; AltName: Full=Ig lambda chain V-VII region MOT; Flags: Precursor && -	-
novel.652	-	scaffold0004	183150547	183151316	-	403	-	- && P80748.2 RecName: Full=Immunoglobulin lambda variable 3-21; AltName: Full=Ig lambda chain V-III region LOI; AltName: Full=Ig lambda chain V-V region DEL; AltName: Full=Ig lambda chain V-VII region MOT; Flags: Precursor && -	-
novel.653	-	scaffold0004	183164749	183165241	-	339	-	- && P01717.2 RecName: Full=Immunoglobulin lambda variable 3-25; AltName: Full=Ig lambda chain V-IV region Hil; Flags: Precursor && -	-
novel.654	-	scaffold0004	183288627	183289393	-	401	-	- && P80748.2 RecName: Full=Immunoglobulin lambda variable 3-21; AltName: Full=Ig lambda chain V-III region LOI; AltName: Full=Ig lambda chain V-V region DEL; AltName: Full=Ig lambda chain V-VII region MOT; Flags: Precursor && -	-
novel.655	-	scaffold0004	183295736	183296244	-	352	-	- && P01717.2 RecName: Full=Immunoglobulin lambda variable 3-25; AltName: Full=Ig lambda chain V-IV region Hil; Flags: Precursor && -	-
novel.656	-	scaffold0004	183701626	183702142	-	385	-	- && P01700.2 RecName: Full=Immunoglobulin lambda variable 1-47; AltName: Full=Ig lambda chain V-I region HA; AltName: Full=Ig lambda chain V-I region WAH; Flags: Precursor && -	-
novel.657	-	scaffold0004	183765976	183766480	-	399	-	- && P01703.2 RecName: Full=Immunoglobulin lambda variable 1-40; AltName: Full=Ig lambda chain V-I region NEWM; Flags: Precursor && -	-
novel.658	-	scaffold0004	183930352	183930925	-	456	-	- && P01703.2 RecName: Full=Immunoglobulin lambda variable 1-40; AltName: Full=Ig lambda chain V-I region NEWM; Flags: Precursor && -	-
novel.659	-	scaffold0004	185947583	185950959	-	1338	-	- && - && -	-
novel.1838	-	scaffold0014	44741904	44743171	-	1268	-	- && - && -	-
novel.1839	-	scaffold0014	45372383	45375912	-	3530	-	- && - && -	-
novel.1348	-	scaffold0009	62195501	62197411	-	1911	-	- && - && -	-
novel.1349	-	scaffold0009	62659459	62660310	-	265	-	- && - && -	-
novel.1830	-	scaffold0014	32134233	32138468	-	656	-	- && - && -	-
novel.1831	-	scaffold0014	32229536	32235533	-	2401	-	- && - && -	-
novel.1832	-	scaffold0014	32885604	32894225	-	209	-	- && - && -	-
novel.1833	-	scaffold0014	33223263	33228799	-	522	-	- && - && -	-
novel.1834	-	scaffold0014	40265681	40297238	-	962	-	- && - && -	-
novel.1835	-	scaffold0014	43476002	43476676	-	675	-	- && - && -	-
novel.1836	-	scaffold0014	43808228	43810990	-	2763	-	- && - && -	-
novel.1837	-	scaffold0014	44685667	44689879	-	2203	-	- && - && -	-
novel.258	-	scaffold0002	69889549	69902825	+	248	-	- && - && -	-
novel.259	-	scaffold0002	72230805	72240159	+	345	-	- && - && -	-
novel.254	-	scaffold0002	68283811	68285700	+	486	-	- && - && -	-
novel.255	-	scaffold0002	68560092	68560363	+	272	-	- && - && -	-
novel.256	-	scaffold0002	68789919	68798799	+	4883	-	- && - && -	-
novel.257	-	scaffold0002	68981888	68988188	+	6301	-	- && P11369.2 RecName: Full=LINE-1 retrotransposable element ORF2 protein; Short=ORF2p; AltName: Full=Long interspersed element-1; Short=L1; AltName: Full=Retrovirus-related Pol polyprotein LINE-1; Includes: RecName: Full=Reverse transcriptase; Includes:	-
novel.250	-	scaffold0002	54809920	54815368	+	815	-	- && - && -	-
novel.251	-	scaffold0002	55571827	55576171	+	892	-	- && - && -	-
novel.252	-	scaffold0002	56977546	56988450	+	434	-	- && - && -	-
novel.253	-	scaffold0002	67068433	67114510	+	3520	-	- && Q5R8H5.1 RecName: Full=General transcription factor IIE subunit 1; AltName: Full=Transcription initiation factor IIE subunit alpha; Short=TFIIE-alpha && PF08271:TFIIB zinc-binding	TFIIB_Zn_Ribbon
novel.1908	-	scaffold0015	12021755	12032862	-	1030	-	- && - && -	-
novel.1909	-	scaffold0015	13797663	13800123	-	2321	-	- && - && -	-
novel.1904	-	scaffold0015	6370358	6372612	-	631	-	- && - && -	-
novel.1905	-	scaffold0015	8157201	8172119	-	2077	-	- && - && -	-
novel.1906	-	scaffold0015	8528559	8537910	-	1983	-	- && Q3T0H0.1 RecName: Full=Leucine carboxyl methyltransferase 1; AltName: Full=[Phosphatase 2A protein]-leucine-carboxy methyltransferase 1 && -	-
novel.1907	-	scaffold0015	10343861	10344693	-	478	-	- && - && -	-
novel.1900	-	scaffold0015	4987532	5098644	-	236	-	- && - && -	-
novel.1901	-	scaffold0015	5599270	5612452	-	275	-	- && - && -	-
novel.1902	-	scaffold0015	5677083	5678647	-	679	-	- && - && -	-
novel.1903	-	scaffold0015	6038314	6059678	-	2633	-	- && - && -	-
novel.492	-	scaffold0003	147737077	147738054	-	562	-	- && - && -	-
novel.493	-	scaffold0003	148785411	148789407	-	1780	-	- && - && -	-
novel.490	-	scaffold0003	147004809	147006650	-	1805	-	- && - && -	-
novel.491	-	scaffold0003	147731164	147736520	-	284	-	- && - && -	-
novel.496	-	scaffold0003	156654392	156658480	-	359	-	- && - && -	-
novel.497	-	scaffold0003	165956456	165959442	-	2987	-	- && - && -	-
novel.494	-	scaffold0003	151582864	151587322	-	1512	-	- && - && -	-
novel.495	-	scaffold0003	155762466	155775757	-	462	-	- && - && -	-
novel.498	-	scaffold0003	165959571	165961276	-	397	-	- && - && -	-
novel.499	-	scaffold0003	166630696	166633014	-	258	-	- && - && -	-
novel.1087	-	scaffold0007	118973306	118979006	-	4059	-	- && Q6UXB1.1 RecName: Full=Insulin growth factor-like family member 3; Flags: Precursor && -	-
novel.3	-	scaffold0001	2182963	2191010	+	8048	-	- && - && -	-
novel.2	-	scaffold0001	1980557	1989158	+	1156	-	- && - && -	-
novel.1	-	scaffold0001	1937891	1954869	+	3298	-	- && - && -	-
novel.7	-	scaffold0001	8380403	8451922	+	1216	-	- && - && -	-
novel.6	-	scaffold0001	7326046	7328122	+	282	-	- && - && -	-
novel.5	-	scaffold0001	5421200	5427888	+	3256	-	- && - && -	-
novel.4	-	scaffold0001	2449094	2450706	+	1069	-	- && - && -	-
novel.9	-	scaffold0001	15248750	15251375	+	680	-	- && - && -	-
novel.8	-	scaffold0001	14308434	14340028	+	1431	-	- && O00370.1 RecName: Full=LINE-1 retrotransposable element ORF2 protein; Short=ORF2p; Includes: RecName: Full=Reverse transcriptase; Includes: RecName: Full=Endonuclease && -	-
novel.816	-	scaffold0005	161723059	161729509	-	3506	-	- && - && -	-
novel.817	-	scaffold0005	161935761	161936758	-	367	-	- && - && -	-
novel.814	-	scaffold0005	157943768	157945027	-	962	-	- && - && -	-
novel.815	-	scaffold0005	158584982	158587444	-	280	-	- && - && -	-
novel.812	-	scaffold0005	150336873	150353095	-	535	-	- && - && -	-
novel.813	-	scaffold0005	152037767	152038292	-	428	-	- && - && -	-
novel.810	-	scaffold0005	147587201	147617051	-	3396	-	- && - && -	-
novel.811	-	scaffold0005	148889198	148890779	-	822	-	- && - && -	-
novel.818	-	scaffold0005	164420882	164422524	-	1013	-	- && - && -	-
novel.819	-	scaffold0005	165618101	165620942	-	512	-	- && - && -	-
novel.1344	-	scaffold0009	57701656	57725197	-	318	-	- && - && -	-
novel.1544	-	scaffold0011	124505631	124512997	+	225	-	- && - && -	-
novel.1545	-	scaffold0011	127417227	127420922	+	235	-	- && - && -	-
novel.1546	-	scaffold0011	133228422	133229670	+	671	-	- && - && -	-
novel.1547	-	scaffold0011	135629139	135632528	+	253	-	- && - && -	-
novel.1540	-	scaffold0011	117123100	117126794	+	3616	-	- && - && -	-
novel.1541	-	scaffold0011	117587691	117589291	+	1601	-	- && - && -	-
novel.1647	-	scaffold0012	8452544	8458915	-	6372	-	- && P60509.1 RecName: Full=Endogenous retrovirus group PABLB member 1 Env polyprotein; AltName: Full=Endogenous retrovirus group PABLB member 1; AltName: Full=Envelope polyprotein; AltName: Full=HERV-R(b) Env protein; AltName: Full=HERV-R(b)_3p24.3 provi	-
novel.1646	-	scaffold0012	3459105	3460382	-	1278	-	- && - && -	-
novel.1645	-	scaffold0012	2392643	2404949	-	1900	-	- && O00370.1 RecName: Full=LINE-1 retrotransposable element ORF2 protein; Short=ORF2p; Includes: RecName: Full=Reverse transcriptase; Includes: RecName: Full=Endonuclease && -	-
novel.1644	-	scaffold0012	2306939	2310153	-	858	-	- && P36415.2 RecName: Full=Heat shock cognate 70 kDa protein 1; Short=HSC70-1 && -	-
novel.1643	-	scaffold0012	1508796	1510704	-	1634	-	- && - && -	-
novel.68	-	scaffold0001	179895645	179900893	+	934	-	- && - && -	-
novel.1641	-	scaffold0012	238738	239025	-	225	-	- && - && -	-
novel.1640	-	scaffold0012	121972611	121973002	+	237	-	- && - && -	-
novel.1139	-	scaffold0008	33158966	33162075	+	601	-	- && - && -	-
novel.1138	-	scaffold0008	32523473	32524058	+	517	-	- && - && -	-
novel.1091	-	scaffold0007	124609767	124618198	-	3366	-	- && Q9UQF0.1 RecName: Full=Syncytin-1; AltName: Full=Endogenous retrovirus group W member 1; AltName: Full=Env-W; AltName: Full=Envelope polyprotein gPr73; AltName: Full=Enverin; AltName: Full=HERV-7q Envelope protein; AltName: Full=HERV-W envelope prote	-
novel.1649	-	scaffold0012	29767239	29778318	-	508	-	- && - && -	-
novel.1648	-	scaffold0012	15833600	15836510	-	2911	-	- && - && -	-
novel.1548	-	scaffold0011	135640955	135641390	+	436	-	- && - && -	-
novel.1549	-	scaffold0011	135642575	135645943	+	1046	-	- && - && -	-
novel.1009	-	scaffold0007	114016678	114016898	+	221	-	- && - && -	-
novel.1008	-	scaffold0007	114007759	114011939	+	2577	-	- && - && -	-
novel.1005	-	scaffold0007	112786729	112788330	+	1576	-	- && P09565.2 RecName: Full=Putative insulin-like growth factor 2-associated protein; AltName: Full=Cell growth-inhibiting gene 44 protein; AltName: Full=Insulin-like growth factor II-associated protein && -	-
novel.1004	-	scaffold0007	112648321	112648588	+	268	-	- && - && -	-
novel.1007	-	scaffold0007	113864923	113865326	+	404	-	- && - && -	-
novel.1099	-	scaffold0007	129898549	129899732	-	318	-	- && - && -	-
novel.1001	-	scaffold0007	111768815	111769757	+	943	-	- && - && -	-
novel.1000	-	scaffold0007	111153746	111158213	+	3742	-	- && - && -	-
novel.1003	-	scaffold0007	112006644	112007376	+	698	-	- && - && -	-
novel.1002	-	scaffold0007	111991960	111992575	+	275	-	- && - && -	-
novel.1739	-	scaffold0013	33968361	33974407	-	1222	-	- && - && -	-
novel.1738	-	scaffold0013	30577177	30596170	-	1084	-	- && - && -	-
novel.1733	-	scaffold0013	20675966	20687833	-	560	-	- && - && -	-
novel.1732	-	scaffold0013	18056519	18081836	-	718	-	- && O00370.1 RecName: Full=LINE-1 retrotransposable element ORF2 protein; Short=ORF2p; Includes: RecName: Full=Reverse transcriptase; Includes: RecName: Full=Endonuclease && -	-
novel.1731	-	scaffold0013	15851472	15948020	-	299	-	- && - && -	-
novel.1730	-	scaffold0013	13045466	13047309	-	1756	-	- && - && -	-
novel.1737	-	scaffold0013	24799691	24802156	-	1082	-	- && - && -	-
novel.1736	-	scaffold0013	24750738	24751565	-	828	-	- && - && -	-
novel.1735	-	scaffold0013	23681056	23681823	-	492	-	- && - && -	-
novel.1734	-	scaffold0013	22999638	23015730	-	232	-	- && - && -	-
novel.1225	-	scaffold0008	84389177	84434509	-	390	-	- && - && -	-
novel.1224	-	scaffold0008	78043309	78051802	-	764	-	- && O00370.1 RecName: Full=LINE-1 retrotransposable element ORF2 protein; Short=ORF2p; Includes: RecName: Full=Reverse transcriptase; Includes: RecName: Full=Endonuclease && -	-
novel.1227	-	scaffold0008	87931445	87943254	-	538	-	- && P82925.3 RecName: Full=28S ribosomal protein S31, mitochondrial; Short=MRP-S31; Short=S31mt; Flags: Precursor && PF15433:Mitochondrial 28S ribosomal protein S31	-
novel.1226	-	scaffold0008	86930711	86938779	-	229	-	- && - && -	-
novel.1221	-	scaffold0008	76744376	76761245	-	1417	-	- && - && -	-
novel.1220	-	scaffold0008	76288588	76293378	-	1216	-	- && - && -	-
novel.1223	-	scaffold0008	77532298	77533333	-	889	-	- && - && -	-
novel.1222	-	scaffold0008	77501672	77506364	-	3037	-	- && - && -	-
novel.395	-	scaffold0002	204366373	204367860	-	810	-	- && - && -	-
novel.394	-	scaffold0002	202620282	202624999	-	1851	-	- && - && -	-
novel.397	-	scaffold0002	205738192	205739272	-	1081	-	- && - && -	-
novel.396	-	scaffold0002	205715850	205716226	-	377	-	- && - && -	-
novel.1229	-	scaffold0008	96669452	96672296	-	1888	-	- && - && -	-
novel.1228	-	scaffold0008	88906923	88908453	-	1039	-	- && - && -	-
novel.393	-	scaffold0002	202425917	202431253	-	414	-	- && - && -	-
novel.392	-	scaffold0002	196900035	196923189	-	306	-	- && - && -	-
novel.231	-	scaffold0002	2669972	2670708	+	737	-	- && P11369.2 RecName: Full=LINE-1 retrotransposable element ORF2 protein; Short=ORF2p; AltName: Full=Long interspersed element-1; Short=L1; AltName: Full=Retrovirus-related Pol polyprotein LINE-1; Includes: RecName: Full=Reverse transcriptase; Includes:	-
novel.236	-	scaffold0002	3876037	3883436	+	3205	-	- && - && -	-
novel.237	-	scaffold0002	6446028	6447748	+	245	-	- && - && -	-
novel.542	-	scaffold0004	92768957	92848806	+	222	-	- && - && -	-
novel.543	-	scaffold0004	96804882	96810259	+	5313	-	- && - && -	-
novel.625	-	scaffold0004	112818897	112850168	-	2678	-	- && - && -	-
novel.624	-	scaffold0004	112442139	112444005	-	1763	-	- && - && -	-
novel.627	-	scaffold0004	118477394	118478505	-	1112	-	- && - && -	-
novel.626	-	scaffold0004	115534737	115587638	-	347	-	- && - && -	-
novel.621	-	scaffold0004	104091530	104100790	-	1079	-	- && - && -	-
novel.620	-	scaffold0004	103839948	103854788	-	840	-	- && - && -	-
novel.623	-	scaffold0004	112269762	112278041	-	8280	-	- && O00370.1 RecName: Full=LINE-1 retrotransposable element ORF2 protein; Short=ORF2p; Includes: RecName: Full=Reverse transcriptase; Includes: RecName: Full=Endonuclease && -	-
novel.622	-	scaffold0004	112055237	112056044	-	681	-	- && - && -	-
novel.629	-	scaffold0004	119226780	119227937	-	263	-	- && - && -	-
novel.628	-	scaffold0004	119191895	119198034	-	2125	-	- && - && -	-
novel.1359	-	scaffold0009	101453319	101483358	-	950	-	- && - && -	-
novel.1358	-	scaffold0009	100764028	100771100	-	1021	-	- && - && -	-
novel.1829	-	scaffold0014	31503102	31504246	-	271	-	- && - && -	-
novel.1828	-	scaffold0014	31345163	31346059	-	865	-	- && - && -	-
novel.1827	-	scaffold0014	28384618	28387543	-	283	-	- && - && -	-
novel.1826	-	scaffold0014	26569921	26577534	-	3060	-	- && - && -	-
novel.1825	-	scaffold0014	26514552	26518952	-	1737	-	- && P49004.2 RecName: Full=DNA polymerase delta subunit 2; AltName: Full=DNA polymerase delta subunit p50 && -	-
novel.1824	-	scaffold0014	26509066	26524959	-	1151	-	- && - && -	-
novel.1823	-	scaffold0014	23635740	23675246	-	367	-	- && - && -	-
novel.1822	-	scaffold0014	17653858	17663630	-	925	-	- && - && -	-
novel.1821	-	scaffold0014	15952029	15953376	-	647	-	- && - && -	-
novel.1820	-	scaffold0014	15949661	15967016	-	1550	-	- && - && -	-
novel.711	-	scaffold0005	103201007	103201440	+	434	-	- && - && -	-
novel.710	-	scaffold0005	103188184	103192670	+	503	-	- && - && -	-
novel.713	-	scaffold0005	108843953	108852725	+	1545	-	- && - && -	-
novel.712	-	scaffold0005	105947211	105949144	+	1934	-	- && - && -	-
novel.715	-	scaffold0005	111131999	111134910	+	2912	-	- && - && -	-
novel.714	-	scaffold0005	111000169	111008236	+	7344	-	- && - && -	-
novel.717	-	scaffold0005	113362876	113363177	+	302	-	- && - && -	-
novel.716	-	scaffold0005	111155786	111156119	+	334	-	- && - && -	-
novel.719	-	scaffold0005	117670695	117671868	+	311	-	- && - && -	-
novel.718	-	scaffold0005	116367698	116372326	+	708	-	- && - && -	-
novel.539	-	scaffold0004	76562010	76590830	+	5002	-	- && - && -	-
novel.538	-	scaffold0004	75802790	76055131	+	586	-	- && - && -	-
novel.531	-	scaffold0004	69734860	69736519	+	1660	-	- && - && -	-
novel.530	-	scaffold0004	68531982	68533019	+	745	-	- && - && -	-
novel.533	-	scaffold0004	70606872	70608709	+	1838	-	- && - && -	-
novel.532	-	scaffold0004	70027172	70034005	+	1398	-	- && - && -	-
novel.535	-	scaffold0004	72130547	72131988	+	1263	-	- && - && -	-
novel.534	-	scaffold0004	71216261	71218909	+	614	-	- && - && -	-
novel.537	-	scaffold0004	74924850	74931931	+	1359	-	- && - && -	-
novel.536	-	scaffold0004	73984169	73988285	+	963	-	- && - && -	-
novel.1913	-	scaffold0015	19133850	19136022	-	2173	-	- && - && -	-
novel.1912	-	scaffold0015	16116587	16118429	-	214	-	- && - && -	-
novel.1911	-	scaffold0015	16096264	16111713	-	1101	-	- && - && -	-
novel.1910	-	scaffold0015	15918672	15920513	-	535	-	- && - && -	-
novel.1917	-	scaffold0015	23875680	23877749	-	644	-	- && - && -	-
novel.1916	-	scaffold0015	23868128	23872881	-	1173	-	- && - && -	-
novel.1915	-	scaffold0015	22841927	22844745	-	2479	-	- && - && -	-
novel.1914	-	scaffold0015	22719558	22722646	-	363	-	- && - && -	-
novel.1919	-	scaffold0015	25712456	25717497	-	292	-	- && - && -	-
novel.1918	-	scaffold0015	23979301	23981875	-	1933	-	- && - && -	-
novel.1896	-	scaffold0015	1744598	1747145	-	956	-	- && - && -	-
novel.1897	-	scaffold0015	1904898	1917582	-	3386	-	- && - && -	-
novel.1894	-	scaffold0015	1709031	1711954	-	300	-	- && - && -	-
novel.1895	-	scaffold0015	1713888	1724890	-	453	-	- && - && -	-
novel.1892	-	scaffold0015	40844816	40845174	+	359	-	- && - && -	-
novel.1893	-	scaffold0015	1535747	1547766	-	2031	-	- && - && -	-
novel.1890	-	scaffold0015	40416604	40421093	+	1912	-	- && - && -	-
novel.1891	-	scaffold0015	40519261	40520323	+	1063	-	- && - && -	-
novel.1711	-	scaffold0013	92609703	92613616	+	3914	-	- && - && -	-
novel.1710	-	scaffold0013	92214068	92214868	+	801	-	- && - && -	-
novel.1713	-	scaffold0013	93436522	93440932	+	526	-	- && - && -	-
novel.1712	-	scaffold0013	92959339	92966347	+	2546	-	- && - && -	-
novel.1715	-	scaffold0013	93951868	93972387	+	6709	-	- && O00370.1 RecName: Full=LINE-1 retrotransposable element ORF2 protein; Short=ORF2p; Includes: RecName: Full=Reverse transcriptase; Includes: RecName: Full=Endonuclease && -	-
novel.1714	-	scaffold0013	93946347	93949624	+	1220	-	- && - && -	-
novel.1717	-	scaffold0013	1041905	1044831	-	2177	-	- && - && -	-
novel.1716	-	scaffold0013	804757	812348	-	5428	-	- && - && -	-
novel.1885	-	scaffold0015	39986315	39986918	+	604	-	- && - && -	-
novel.829	-	scaffold0006	25122361	25122582	+	222	-	- && - && -	-
novel.828	-	scaffold0006	21224009	21235000	+	1638	-	- && - && -	-
novel.823	-	scaffold0005	201318580	201340727	-	416	-	- && - && -	-
novel.822	-	scaffold0005	191301266	191330712	-	634	-	- && - && -	-
novel.821	-	scaffold0005	186213444	186215185	-	1742	-	- && - && -	-
novel.820	-	scaffold0005	186067947	186071519	-	478	-	- && - && -	-
novel.827	-	scaffold0006	19500951	19515019	+	7033	-	- && O00370.1 RecName: Full=LINE-1 retrotransposable element ORF2 protein; Short=ORF2p; Includes: RecName: Full=Reverse transcriptase; Includes: RecName: Full=Endonuclease && -	-
novel.826	-	scaffold0006	9386617	9390777	+	4161	-	- && - && -	-
novel.825	-	scaffold0006	7163596	7167598	+	461	-	- && - && -	-
novel.824	-	scaffold0005	201654664	201656069	-	685	-	- && - && -	-
novel.1887	-	scaffold0015	40404085	40411089	+	4370	-	- && - && -	-
novel.1502	-	scaffold0011	12403250	12403693	+	272	-	- && - && -	-
novel.1090	-	scaffold0007	124589853	124597397	-	636	-	- && - && -	-
novel.1104	-	scaffold0007	133834090	133837086	-	295	-	- && - && -	-
novel.1105	-	scaffold0007	133877108	133936387	-	6356	-	- && Q6P280.2 RecName: Full=Zinc finger protein 529 && PF00096:Zinc finger, C2H2 type|PF01352:KRAB box	KRAB
novel.1106	-	scaffold0007	133980800	133996459	-	668	-	- && Q8TAF7.2 RecName: Full=Zinc finger protein 461; AltName: Full=Gonadotropin-inducible ovary transcription repressor 1; Short=GIOT-1 && PF01352:KRAB box	KRAB
novel.1107	-	scaffold0007	135085599	135098914	-	989	-	- && - && -	-
novel.1100	-	scaffold0007	131353417	131365715	-	8204	-	- && - && -	-
novel.1101	-	scaffold0007	131667713	131669848	-	606	-	- && - && -	-
novel.1102	-	scaffold0007	131822358	131825782	-	270	-	- && - && -	-
novel.1103	-	scaffold0007	131910485	131910703	-	219	-	- && - && -	-
novel.1503	-	scaffold0011	15637630	15641547	+	3918	-	- && - && -	-
novel.1108	-	scaffold0007	135959682	135961035	-	580	-	- && - && -	-
novel.1109	-	scaffold0007	136423134	136429007	-	1355	-	- && - && -	-
novel.1030	-	scaffold0007	135082491	135085544	+	1692	-	- && - && -	-
novel.1031	-	scaffold0007	135269345	135271714	+	1534	-	- && Q96MW7.1 RecName: Full=Tigger transposable element-derived protein 1 && PF04218:CENP-B N-terminal DNA-binding domain	CENP-B_N
novel.1032	-	scaffold0007	135584275	135596560	+	7266	-	- && - && -	-
novel.1033	-	scaffold0007	136424530	136427097	+	2568	-	- && - && -	-
novel.88	-	scaffold0001	250795872	250829699	+	6726	-	- && - && -	-
novel.89	-	scaffold0001	252319915	252327869	+	1270	-	- && - && -	-
novel.1036	-	scaffold0007	149104304	149112754	+	1133	-	- && - && -	-
novel.1037	-	scaffold0007	157680738	157685169	+	441	-	- && - && -	-
novel.84	-	scaffold0001	237932923	237937171	+	662	-	- && - && -	-
novel.85	-	scaffold0001	241150310	241155027	+	1613	-	- && - && -	-
novel.86	-	scaffold0001	244622381	244626417	+	4037	-	- && - && -	-
novel.87	-	scaffold0001	248414806	248416723	+	521	-	- && - && -	-
novel.80	-	scaffold0001	222246366	222248119	+	402	-	- && - && -	-
novel.81	-	scaffold0001	222777950	222778880	+	835	-	- && - && -	-
novel.82	-	scaffold0001	228000671	228027292	+	592	-	- && - && -	-
novel.83	-	scaffold0001	228133961	228196946	+	289	-	- && - && -	-
novel.1218	-	scaffold0008	75285524	75285963	-	440	-	- && - && -	-
novel.1219	-	scaffold0008	75551595	75552114	-	430	-	- && - && -	-
novel.1748	-	scaffold0013	66178289	66185246	-	286	-	- && - && -	-
novel.1749	-	scaffold0013	67726218	67727651	-	1434	-	- && - && -	-
novel.1746	-	scaffold0013	54330384	54331714	-	467	-	- && - && -	-
novel.1747	-	scaffold0013	54447612	54496358	-	3304	-	- && - && -	-
novel.1212	-	scaffold0008	64637024	64696351	-	1777	-	- && P47226.1 RecName: Full=Testin; AltName: Full=TES1/TES2 && -	-
novel.1213	-	scaffold0008	71493065	71551452	-	280	-	- && - && -	-
novel.1742	-	scaffold0013	37702898	37767186	-	1013	-	- && - && -	-
novel.1743	-	scaffold0013	46203535	46239755	-	284	-	- && - && -	-
novel.1740	-	scaffold0013	34097622	34103662	-	1071	-	- && - && -	-
novel.1217	-	scaffold0008	74936087	74948745	-	2364	-	- && Q5M981.2 RecName: Full=Ubiquitin carboxyl-terminal hydrolase 12-B; AltName: Full=Deubiquitinating enzyme 12-B; AltName: Full=Ubiquitin thioesterase 12-B; AltName: Full=Ubiquitin-specific-processing protease 12-B && -	-
novel.1588	-	scaffold0011	81155629	81176894	-	877	-	- && - && -	-
novel.1589	-	scaffold0011	84524253	84539747	-	1900	-	- && P08548.1 RecName: Full=LINE-1 reverse transcriptase homolog && -	-
novel.388	-	scaffold0002	172077200	172078986	-	289	-	- && - && -	-
novel.389	-	scaffold0002	183646663	183648839	-	276	-	- && - && -	-
novel.1580	-	scaffold0011	44141492	44142684	-	1193	-	- && - && -	-
novel.1581	-	scaffold0011	50302353	50309685	-	2357	-	- && - && -	-
novel.1582	-	scaffold0011	57299257	57301162	-	1659	-	- && - && -	-
novel.1583	-	scaffold0011	63378182	63384724	-	672	-	- && - && -	-
novel.1584	-	scaffold0011	66672895	66673848	-	226	-	- && - && -	-
novel.1585	-	scaffold0011	66896340	66901122	-	271	-	- && - && -	-
novel.1586	-	scaffold0011	69685706	69686443	-	629	-	- && - && -	-
novel.1587	-	scaffold0011	76154260	76156097	-	622	-	- && - && -	-
novel.636	-	scaffold0004	130934008	130943957	-	1460	-	- && Q32PA5.1 RecName: Full=Ubiquitin-conjugating enzyme E2 C; AltName: Full=(E3-independent) E2 ubiquitin-conjugating enzyme C; AltName: Full=E2 ubiquitin-conjugating enzyme C; AltName: Full=Ubiquitin carrier protein C; AltName: Full=Ubiquitin-protein li	-
novel.637	-	scaffold0004	137270226	137270586	-	361	-	- && - && -	-
novel.634	-	scaffold0004	129435480	129438104	-	434	-	- && O00370.1 RecName: Full=LINE-1 retrotransposable element ORF2 protein; Short=ORF2p; Includes: RecName: Full=Reverse transcriptase; Includes: RecName: Full=Endonuclease && -	-
novel.635	-	scaffold0004	130376555	130387386	-	541	-	- && - && -	-
novel.632	-	scaffold0004	127313828	127316682	-	2855	-	- && - && -	-
novel.633	-	scaffold0004	128300966	128301878	-	235	-	- && - && -	-
novel.630	-	scaffold0004	121041200	121044680	-	219	-	- && - && -	-
novel.631	-	scaffold0004	124277315	124279320	-	2006	-	- && - && -	-
novel.638	-	scaffold0004	141177290	141191886	-	1234	-	- && - && -	-
novel.639	-	scaffold0004	145398620	145399720	-	362	-	- && - && -	-
novel.1368	-	scaffold0009	117144796	117194418	-	4005	-	- && - && -	-
novel.1369	-	scaffold0009	118547651	118554550	-	481	-	- && - && -	-
novel.1364	-	scaffold0009	114666936	114690762	-	1916	-	- && - && -	-
novel.1365	-	scaffold0009	115716362	115731052	-	339	-	- && - && -	-
novel.1366	-	scaffold0009	115752566	115754061	-	669	-	- && - && -	-
novel.1367	-	scaffold0009	115838559	115851665	-	655	-	- && - && -	-
novel.1192	-	scaffold0008	35911793	35913437	-	1645	-	- && - && -	-
novel.1361	-	scaffold0009	106561318	106583823	-	2480	-	- && - && -	-
novel.1362	-	scaffold0009	108206211	108211483	-	1504	-	- && O00370.1 RecName: Full=LINE-1 retrotransposable element ORF2 protein; Short=ORF2p; Includes: RecName: Full=Reverse transcriptase; Includes: RecName: Full=Endonuclease && -	-
novel.1363	-	scaffold0009	108643311	108645147	-	1160	-	- && - && -	-
novel.1698	-	scaffold0013	54102724	54119573	+	1427	-	- && - && -	-
novel.1699	-	scaffold0013	62621215	62653720	+	494	-	- && - && -	-
novel.1694	-	scaffold0013	45965199	46011993	+	655	-	- && - && -	-
novel.1695	-	scaffold0013	47101633	47101919	+	287	-	- && - && -	-
novel.1696	-	scaffold0013	47456324	47457462	+	590	-	- && - && -	-
novel.1697	-	scaffold0013	54029422	54033891	+	3375	-	- && - && -	-
novel.1690	-	scaffold0013	31518908	31521423	+	311	-	- && - && -	-
novel.1691	-	scaffold0013	32056135	32061096	+	4022	-	- && - && -	-
novel.1692	-	scaffold0013	32635441	32640915	+	2521	-	- && - && -	-
novel.1693	-	scaffold0013	37870644	37873391	+	2533	-	- && - && -	-
novel.702	-	scaffold0005	92288959	92295319	+	5970	-	- && - && -	-
novel.703	-	scaffold0005	93268928	93294205	+	545	-	- && - && -	-
novel.700	-	scaffold0005	91664157	91670804	+	6021	-	- && P12894.1 RecName: Full=Probable Pol polyprotein; Contains: RecName: Full=Reverse transcriptase/ribonuclease H; Short=RT; Contains: RecName: Full=Integrase; Short=IN && PF00607:gag gene protein p24 (core nucleocapsid protein)|PF02022:Integrase Zinc bi	rve
novel.701	-	scaffold0005	91854650	91866883	+	458	-	- && - && -	-
novel.706	-	scaffold0005	98199871	98201431	+	1525	-	- && - && -	-
novel.707	-	scaffold0005	98554015	98554309	+	255	-	- && - && -	-
novel.704	-	scaffold0005	95405310	95406055	+	746	-	- && - && -	-
novel.705	-	scaffold0005	98041308	98049558	+	3395	-	- && - && -	-
novel.39	-	scaffold0001	123436069	123455852	+	3690	-	- && - && -	-
novel.708	-	scaffold0005	99184960	99187382	+	580	-	- && - && -	-
novel.709	-	scaffold0005	101139670	101143206	+	3193	-	- && - && -	-
novel.1517	-	scaffold0011	61613240	61613578	+	339	-	- && - && -	-
novel.528	-	scaffold0004	66419359	66422003	+	436	-	- && - && -	-
novel.529	-	scaffold0004	68048880	68049515	+	636	-	- && - && -	-
novel.1516	-	scaffold0011	54759565	54803581	+	1906	-	- && - && -	-
novel.522	-	scaffold0004	39798367	39835225	+	1836	-	- && - && -	-
novel.523	-	scaffold0004	44487334	44505255	+	270	-	- && - && -	-
novel.520	-	scaffold0004	36613637	36626154	+	877	-	- && - && -	-
novel.521	-	scaffold0004	39777544	39782867	+	2134	-	- && - && -	-
novel.526	-	scaffold0004	45888591	45899029	+	1005	-	- && - && -	-
novel.1515	-	scaffold0011	52954980	52961901	+	6510	-	- && - && -	-
novel.524	-	scaffold0004	45127512	45128871	+	1058	-	- && - && -	-
novel.525	-	scaffold0004	45432981	45470445	+	1312	-	- && - && -	-
novel.1514	-	scaffold0011	52936278	52948633	+	8989	-	- && P60509.1 RecName: Full=Endogenous retrovirus group PABLB member 1 Env polyprotein; AltName: Full=Endogenous retrovirus group PABLB member 1; AltName: Full=Envelope polyprotein; AltName: Full=HERV-R(b) Env protein; AltName: Full=HERV-R(b)_3p24.3 provi	rve
novel.38	-	scaffold0001	123090523	123091134	+	378	-	- && - && -	-
novel.1513	-	scaffold0011	50503809	50540758	+	2682	-	- && P03356.2 RecName: Full=Pol polyprotein; Contains: RecName: Full=Protease; Contains: RecName: Full=Reverse transcriptase/ribonuclease H; Short=RT; Contains: RecName: Full=Integrase; Short=IN && -	-
novel.1512	-	scaffold0011	29205726	29206050	+	251	-	- && - && -	-
novel.1511	-	scaffold0011	28755357	28758986	+	492	-	- && - && -	-
novel.1098	-	scaffold0007	129573901	129601661	-	4463	-	- && Q13398.2 RecName: Full=Zinc finger protein 211; AltName: Full=Zinc finger protein C2H2-25 && PF13912:C2H2-type zinc finger|PF01352:KRAB box	KRAB
novel.1510	-	scaffold0011	28205916	28213573	+	226	-	- && - && -	-
novel.35	-	scaffold0001	98044566	98057812	+	1392	-	- && - && -	-
novel.43	-	scaffold0001	133242605	133252797	+	513	-	- && - && -	-
novel.1197	-	scaffold0008	44564441	44570682	-	2107	-	- && - && -	-
novel.34	-	scaffold0001	97932367	97968499	+	2490	-	- && - && -	-
novel.1807	-	scaffold0014	49063091	49067224	+	640	-	- && - && -	-
novel.1806	-	scaffold0014	48982615	48984725	+	1473	-	- && - && -	-
novel.1196	-	scaffold0008	41477231	41478191	-	930	-	- && - && -	-
novel.1519	-	scaffold0011	64719804	64761574	+	346	-	- && - && -	-
novel.1518	-	scaffold0011	64405924	64408937	+	2707	-	- && - && -	-
novel.1809	-	scaffold0014	1519768	1523553	-	1359	-	- && - && -	-
novel.1808	-	scaffold0014	49123800	49127089	+	1139	-	- && - && -	-
novel.838	-	scaffold0006	66112363	66153333	+	235	-	- && - && -	-
novel.839	-	scaffold0006	70082637	70083934	+	859	-	- && - && -	-
novel.834	-	scaffold0006	33834277	33836901	+	254	-	- && - && -	-
novel.835	-	scaffold0006	34024847	34148992	+	341	-	- && - && -	-
novel.836	-	scaffold0006	36085717	36171246	+	206	-	- && - && -	-
novel.837	-	scaffold0006	52200209	52202523	+	1679	-	- && - && -	-
novel.830	-	scaffold0006	25127677	25128872	+	516	-	- && - && -	-
novel.831	-	scaffold0006	32823487	32824598	+	742	-	- && - && -	-
novel.832	-	scaffold0006	32964037	32967867	+	1085	-	- && - && -	-
novel.833	-	scaffold0006	33287290	33295681	+	8392	-	- && - && -	-
novel.1027	-	scaffold0007	133837469	133880783	+	270	-	- && - && -	-
novel.1026	-	scaffold0007	133577136	133581581	+	569	-	- && - && -	-
novel.1025	-	scaffold0007	131828332	131829372	+	352	-	- && - && -	-
novel.1024	-	scaffold0007	131187823	131212984	+	1388	-	- && - && -	-
novel.1023	-	scaffold0007	129961983	129963244	+	1262	-	- && - && -	-
novel.1022	-	scaffold0007	129466188	129503936	+	3294	-	- && - && PF00096:Zinc finger, C2H2 type	zf-C2H2
novel.99	-	scaffold0001	274853470	274873535	+	1344	-	- && - && -	-
novel.98	-	scaffold0001	274838304	274840203	+	1185	-	- && - && -	-
novel.97	-	scaffold0001	273152074	273161540	+	6683	-	- && - && -	-
novel.96	-	scaffold0001	272863729	272869879	+	604	-	- && - && -	-
novel.95	-	scaffold0001	272718151	272721491	+	3321	-	- && - && -	-
novel.94	-	scaffold0001	271852982	271855164	+	2183	-	- && - && -	-
novel.93	-	scaffold0001	270974898	270975841	+	944	-	- && - && -	-
novel.92	-	scaffold0001	268445811	268449745	+	409	-	- && - && -	-
novel.1029	-	scaffold0007	134887217	134892131	+	1419	-	- && O00370.1 RecName: Full=LINE-1 retrotransposable element ORF2 protein; Short=ORF2p; Includes: RecName: Full=Reverse transcriptase; Includes: RecName: Full=Endonuclease && -	-
novel.1028	-	scaffold0007	134064521	134064814	+	294	-	- && - && -	-
novel.1759	-	scaffold0013	89948561	89949163	-	603	-	- && - && -	-
novel.1758	-	scaffold0013	88726138	88766141	-	831	-	- && - && -	-
novel.1209	-	scaffold0008	61938500	61941297	-	2798	-	- && - && -	-
novel.1208	-	scaffold0008	50761389	50767488	-	638	-	- && P35979.2 RecName: Full=60S ribosomal protein L12 && PF00298:Ribosomal protein L11, RNA binding domain	-
novel.1755	-	scaffold0013	81751758	81756989	-	487	-	- && - && -	-
novel.1754	-	scaffold0013	81025519	81058430	-	260	-	- && - && -	-
novel.1757	-	scaffold0013	87074542	87074786	-	245	-	- && - && -	-
novel.1756	-	scaffold0013	83800664	83803864	-	3181	-	- && - && -	-
novel.1751	-	scaffold0013	69602327	69604865	-	532	-	- && - && -	-
novel.1750	-	scaffold0013	69566523	69566944	-	202	-	- && - && -	-
novel.1753	-	scaffold0013	76936674	76942919	-	1103	-	- && - && -	-
novel.1752	-	scaffold0013	76678018	76679474	-	1457	-	- && - && -	-
novel.1599	-	scaffold0011	122873306	122880279	-	299	-	- && - && -	-
novel.1598	-	scaffold0011	120253608	120254581	-	315	-	- && - && -	-
novel.1597	-	scaffold0011	120244653	120249967	-	1929	-	- && - && -	-
novel.1596	-	scaffold0011	111805651	111807817	-	982	-	- && - && -	-
novel.1595	-	scaffold0011	111475327	111478491	-	310	-	- && - && -	-
novel.1594	-	scaffold0011	92598269	92604870	-	643	-	- && - && -	-
novel.1593	-	scaffold0011	90973668	90978404	-	4287	-	- && - && -	-
novel.1592	-	scaffold0011	90225350	90247697	-	3624	-	- && O00370.1 RecName: Full=LINE-1 retrotransposable element ORF2 protein; Short=ORF2p; Includes: RecName: Full=Reverse transcriptase; Includes: RecName: Full=Endonuclease && -	-
novel.1591	-	scaffold0011	89410374	89479366	-	4883	-	- && - && -	-
novel.1590	-	scaffold0011	88032652	88036711	-	251	-	- && - && -	-
novel.48	-	scaffold0001	137942804	137947944	+	1388	-	- && - && -	-
novel.49	-	scaffold0001	141042564	141047831	+	2240	-	- && - && -	-
novel.1119	-	scaffold0007	173282613	173285192	-	2580	-	- && - && -	-
novel.1118	-	scaffold0007	171398393	171403754	-	335	-	- && - && -	-
novel.1113	-	scaffold0007	158987235	158993309	-	4415	-	- && - && -	-
novel.1112	-	scaffold0007	150532490	150534151	-	284	-	- && - && -	-
novel.1111	-	scaffold0007	141432308	141436903	-	1219	-	- && - && -	-
novel.1110	-	scaffold0007	138451439	138456745	-	2891	-	- && - && -	-
novel.1117	-	scaffold0007	170367544	170376114	-	734	-	- && - && -	-
novel.1116	-	scaffold0007	166938506	166941619	-	1076	-	- && - && -	-
novel.1115	-	scaffold0007	165458840	165459810	-	971	-	- && - && -	-
novel.1114	-	scaffold0007	164426076	164435146	-	313	-	- && - && -	-
novel.1373	-	scaffold0009	132458782	132460957	-	725	-	- && - && -	-
novel.1372	-	scaffold0009	132313330	132321964	-	838	-	- && - && -	-
novel.1371	-	scaffold0009	119560020	119565744	-	1040	-	- && - && -	-
novel.1370	-	scaffold0009	119320830	119321788	-	243	-	- && - && -	-
novel.1377	-	scaffold0009	144030070	144041697	-	325	-	- && - && -	-
novel.1376	-	scaffold0009	143069187	143074443	-	2042	-	- && - && -	-
novel.1375	-	scaffold0009	141980900	141984820	-	3413	-	- && - && -	-
novel.1374	-	scaffold0009	136128479	136149945	-	546	-	- && - && -	-
novel.1379	-	scaffold0009	145572081	145584936	-	1891	-	- && - && -	-
novel.1378	-	scaffold0009	144638906	144671265	-	2099	-	- && - && -	-
novel.42	-	scaffold0001	129112741	129116067	+	1143	-	- && Q7KZI7.2 RecName: Full=Serine/threonine-protein kinase MARK2; AltName: Full=ELKL motif kinase 1; Short=EMK-1; AltName: Full=MAP/microtubule affinity-regulating kinase 2; AltName: Full=PAR1 homolog; AltName: Full=PAR1 homolog b; Short=Par-1b; Short=Pa	-
novel.1683	-	scaffold0013	20287278	20291594	+	437	-	- && - && -	-
novel.1682	-	scaffold0013	19957289	19958445	+	1061	-	- && - && -	-
novel.1681	-	scaffold0013	10666853	10668411	+	583	-	- && - && -	-
novel.1680	-	scaffold0013	9994085	9997876	+	3792	-	- && - && -	-
novel.1687	-	scaffold0013	29471853	29472416	+	564	-	- && - && -	-
novel.1686	-	scaffold0013	24917979	24935138	+	252	-	- && - && -	-
novel.1685	-	scaffold0013	20922895	20928464	+	965	-	- && - && -	-
novel.1684	-	scaffold0013	20516923	20519852	+	283	-	- && - && -	-
novel.1689	-	scaffold0013	29827195	29828260	+	1066	-	- && - && -	-
novel.1688	-	scaffold0013	29818719	29826615	+	4570	-	- && P60509.1 RecName: Full=Endogenous retrovirus group PABLB member 1 Env polyprotein; AltName: Full=Endogenous retrovirus group PABLB member 1; AltName: Full=Envelope polyprotein; AltName: Full=HERV-R(b) Env protein; AltName: Full=HERV-R(b)_3p24.3 provi	-
novel.289	-	scaffold0002	154356475	154357025	+	430	-	- && - && -	-
novel.288	-	scaffold0002	153470479	153473161	+	2683	-	- && - && -	-
novel.737	-	scaffold0005	147322459	147353732	+	672	-	- && - && -	-
novel.736	-	scaffold0005	147062067	147078730	+	2049	-	- && P31792.1 RecName: Full=Pol polyprotein; Contains: RecName: Full=Reverse transcriptase/ribonuclease H; Short=RT; Contains: RecName: Full=Integrase; Short=IN && PF02093:Gag P30 core shell protein	Gag_p30
novel.735	-	scaffold0005	145727515	145727866	+	352	-	- && - && -	-
novel.734	-	scaffold0005	142172128	142183174	+	4456	-	- && - && -	-
novel.733	-	scaffold0005	141858338	141858617	+	280	-	- && - && -	-
novel.732	-	scaffold0005	140855398	140860235	+	3951	-	- && - && -	-
novel.731	-	scaffold0005	139122499	139125805	+	306	-	- && Q8WWQ2.3 RecName: Full=Inactive heparanase-2; Short=Hpa2; Flags: Precursor && -	-
novel.730	-	scaffold0005	136050196	136054985	+	1782	-	- && O00370.1 RecName: Full=LINE-1 retrotransposable element ORF2 protein; Short=ORF2p; Includes: RecName: Full=Reverse transcriptase; Includes: RecName: Full=Endonuclease && -	-
novel.739	-	scaffold0005	147715114	147718405	+	703	-	- && - && -	-
novel.738	-	scaffold0005	147481496	147485137	+	1026	-	- && - && -	-
novel.225	-	scaffold0002	1447828	1451065	+	3198	-	- && - && -	-
novel.518	-	scaffold0004	32238632	32292580	+	265	-	- && - && -	-
novel.517	-	scaffold0004	25824032	25825497	+	1339	-	- && - && -	-
novel.516	-	scaffold0004	24288320	24288723	+	296	-	- && - && -	-
novel.515	-	scaffold0004	21334523	21349558	+	316	-	- && - && -	-
novel.514	-	scaffold0004	14924695	14933270	+	232	-	- && - && -	-
novel.513	-	scaffold0004	14748343	14790466	+	1733	-	- && E5RQL4.1 RecName: Full=Formiminotransferase N-terminal subdomain-containing protein; AltName: Full=Formiminotransferase-cyclodeaminase N-terminal-like protein; Flags: Precursor && -	-
novel.512	-	scaffold0004	12751327	12751712	+	265	-	- && - && -	-
novel.511	-	scaffold0004	12736078	12746598	+	2065	-	- && - && -	-
novel.510	-	scaffold0004	12169187	12171976	+	247	-	- && Q6P1L5.2 RecName: Full=Protein FAM117B; AltName: Full=Amyotrophic lateral sclerosis 2 chromosomal region candidate gene 13 protein && -	-
novel.488	-	scaffold0003	141292675	141293689	-	782	-	- && - && -	-
novel.359	-	scaffold0002	81429262	81430368	-	428	-	- && - && -	-
novel.358	-	scaffold0002	81428834	81429248	-	415	-	- && - && -	-
novel.609	-	scaffold0004	81847917	81851789	-	3873	-	- && - && -	-
novel.608	-	scaffold0004	81744073	81745776	-	273	-	- && - && -	-
novel.603	-	scaffold0004	66613986	66616497	-	215	-	- && Q6ZT12.2 RecName: Full=E3 ubiquitin-protein ligase UBR3; AltName: Full=N-recognin-3; AltName: Full=Ubiquitin-protein ligase E3-alpha-3; AltName: Full=Ubiquitin-protein ligase E3-alpha-III; AltName: Full=Zinc finger protein 650 && -	-
novel.602	-	scaffold0004	55127003	55147865	-	251	-	- && - && -	-
novel.353	-	scaffold0002	75656254	75657450	-	590	-	- && - && -	-
novel.352	-	scaffold0002	75186209	75189313	-	316	-	- && - && -	-
novel.607	-	scaffold0004	77337081	77367996	-	841	-	- && O00370.1 RecName: Full=LINE-1 retrotransposable element ORF2 protein; Short=ORF2p; Includes: RecName: Full=Reverse transcriptase; Includes: RecName: Full=Endonuclease && -	-
novel.354	-	scaffold0002	79120156	79125579	-	1568	-	- && - && -	-
novel.357	-	scaffold0002	81381763	81383307	-	1545	-	- && - && -	-
novel.356	-	scaffold0002	80913805	80919940	-	321	-	- && - && -	-
novel.1744	-	scaffold0013	47925804	47980420	-	2677	-	- && Q5VW36.1 RecName: Full=Focadhesin && -	-
novel.1745	-	scaffold0013	52128853	52129750	-	714	-	- && - && -	-
novel.552	-	scaffold0004	124558046	124565414	+	7369	-	- && - && -	-
novel.1351	-	scaffold0009	75215819	75219842	-	3647	-	- && - && -	-
novel.1741	-	scaffold0013	35845290	35845856	-	567	-	- && - && -	-
novel.1350	-	scaffold0009	69927276	70016638	-	972	-	- && P11369.2 RecName: Full=LINE-1 retrotransposable element ORF2 protein; Short=ORF2p; AltName: Full=Long interspersed element-1; Short=L1; AltName: Full=Retrovirus-related Pol polyprotein LINE-1; Includes: RecName: Full=Reverse transcriptase; Includes:	-
novel.1353	-	scaffold0009	77001501	77141714	-	277	-	- && Q96MW7.1 RecName: Full=Tigger transposable element-derived protein 1 && -	-
novel.1306	-	scaffold0009	140027892	140051125	+	1886	-	- && - && -	-
novel.1307	-	scaffold0009	140272756	140279723	+	1544	-	- && - && -	-
novel.1308	-	scaffold0009	142144644	142145993	+	768	-	- && - && -	-
novel.1309	-	scaffold0009	143024155	143025066	+	890	-	- && - && -	-
novel.1760	-	scaffold0013	89957276	89978082	-	920	-	- && - && -	-
novel.1761	-	scaffold0013	91119998	91121922	-	586	-	- && O00370.1 RecName: Full=LINE-1 retrotransposable element ORF2 protein; Short=ORF2p; Includes: RecName: Full=Reverse transcriptase; Includes: RecName: Full=Endonuclease && -	-
novel.1762	-	scaffold0013	92799573	92801374	-	1699	-	- && - && -	-
novel.1763	-	scaffold0013	92896494	92898269	-	1694	-	- && - && -	-
novel.1764	-	scaffold0013	92916408	92923166	-	4032	-	- && - && -	-
novel.1765	-	scaffold0013	93841792	93845340	-	818	-	- && - && -	-
novel.1766	-	scaffold0013	94171909	94173006	-	285	-	- && - && -	-
novel.1767	-	scaffold0014	530505	531044	+	406	-	- && - && -	-
novel.1768	-	scaffold0014	2631104	2653545	+	873	-	- && - && -	-
novel.1769	-	scaffold0014	3238366	3239693	+	870	-	- && - && -	-
novel.1562	-	scaffold0011	11083661	11093018	-	1275	-	- && - && -	-
novel.1563	-	scaffold0011	11731222	11734275	-	726	-	- && - && -	-
novel.1560	-	scaffold0011	8174224	8176259	-	250	-	- && - && -	-
novel.1561	-	scaffold0011	11059528	11061030	-	1503	-	- && - && -	-
novel.1566	-	scaffold0011	12623205	12625434	-	388	-	- && - && -	-
novel.1567	-	scaffold0011	15481788	15485123	-	258	-	- && - && -	-
novel.1564	-	scaffold0011	12592516	12593670	-	1155	-	- && - && -	-
novel.1565	-	scaffold0011	12593902	12605027	-	1692	-	- && - && -	-
novel.40	-	scaffold0001	124974574	124974792	+	219	-	- && - && -	-
novel.41	-	scaffold0001	125411201	125415352	+	3688	-	- && - && -	-
novel.1568	-	scaffold0011	15608894	15611803	-	1120	-	- && - && -	-
novel.1569	-	scaffold0011	15831786	15836036	-	939	-	- && - && -	-
novel.44	-	scaffold0001	135634183	135635252	+	391	-	- && - && -	-
novel.45	-	scaffold0001	137474708	137476914	+	972	-	- && - && -	-
novel.46	-	scaffold0001	137725497	137733031	+	421	-	- && - && -	-
novel.47	-	scaffold0001	137744039	137744475	+	269	-	- && - && -	-
novel.1168	-	scaffold0008	108938284	108941826	+	2161	-	- && P31789.1 RecName: Full=Envelope glycoprotein; AltName: Full=Env polyprotein; Contains: RecName: Full=Surface protein; Short=SU; Contains: RecName: Full=Transmembrane protein; Short=TM; Flags: Precursor [Mouse Intracisternal A-particle] && PF00517:Ret	-
novel.1169	-	scaffold0008	117281390	117320264	+	510	-	- && - && -	-
novel.1166	-	scaffold0008	90393674	90397361	+	3688	-	- && - && -	-
novel.1167	-	scaffold0008	92104427	92132814	+	688	-	- && - && -	-
novel.1164	-	scaffold0008	88616429	88636639	+	3131	-	- && - && -	-
novel.1165	-	scaffold0008	88817615	88822631	+	543	-	- && - && -	-
novel.1162	-	scaffold0008	87315853	87353466	+	886	-	- && - && -	-
novel.1163	-	scaffold0008	87923996	87942615	+	1044	-	- && - && -	-
novel.1160	-	scaffold0008	78559530	78579525	+	1904	-	- && - && -	-
novel.1161	-	scaffold0008	81234360	81241580	+	1508	-	- && - && -	-
novel.298	-	scaffold0002	199811895	199826041	+	287	-	- && - && -	-
novel.299	-	scaffold0002	202485637	202488492	+	715	-	- && - && -	-
novel.1304	-	scaffold0009	133978048	133992033	+	1777	-	- && - && -	-
novel.1305	-	scaffold0009	136170737	136173255	+	2519	-	- && - && -	-
novel.1302	-	scaffold0009	131088220	131090933	+	633	-	- && - && -	-
novel.1303	-	scaffold0009	133899696	133902151	+	335	-	- && - && -	-
novel.1300	-	scaffold0009	121656725	121735473	+	415	-	- && - && -	-
novel.1301	-	scaffold0009	131061659	131062650	+	244	-	- && - && -	-
novel.290	-	scaffold0002	161878664	161881758	+	1574	-	- && - && -	-
novel.291	-	scaffold0002	161957109	161957925	+	239	-	- && - && -	-
novel.292	-	scaffold0002	163307478	163314621	+	455	-	- && - && -	-
novel.293	-	scaffold0002	164611661	164613498	+	1838	-	- && - && -	-
novel.294	-	scaffold0002	165428728	165459978	+	5340	-	- && - && -	-
novel.295	-	scaffold0002	165794111	165799936	+	1379	-	- && - && -	-
novel.296	-	scaffold0002	176564009	176566013	+	206	-	- && - && -	-
novel.297	-	scaffold0002	198454808	198456291	+	1011	-	- && - && -	-
novel.728	-	scaffold0005	134951186	134952618	+	1273	-	- && - && -	-
novel.729	-	scaffold0005	135646353	135659392	+	1592	-	- && - && -	-
novel.720	-	scaffold0005	119537229	119539246	+	926	-	- && - && -	-
novel.721	-	scaffold0005	122680140	122682256	+	628	-	- && - && -	-
novel.722	-	scaffold0005	123389218	123395578	+	1555	-	- && - && -	-
novel.723	-	scaffold0005	125719022	125743134	+	915	-	- && - && -	-
novel.724	-	scaffold0005	125765055	125836577	+	2629	-	- && - && -	-
novel.725	-	scaffold0005	129609651	129618119	+	2534	-	- && - && -	-
novel.726	-	scaffold0005	129622490	129625024	+	1592	-	- && - && -	-
novel.727	-	scaffold0005	134777941	134778351	+	411	-	- && - && -	-
