# Supplementary material for: Comparative transcriptome analysis revealed omnivorous adaptation of the small intestine of Melinae
Source: Research Square preprint supplement (doi:10.21203/rs.3.rs-598218/v1), 2022-04-14
Supplement: Supplementary file 2 [file 6d086c66ff071a62ac361329.xls]

## Sheet: gene_fpkm
Table S4 FPKM values of genes in all samples
gene_id	TW1_1	TW1_2	TW1_3	TB1_1	TB1_2	TB1_3	AW1_1	AW1_2	AW1_3	AB1_1	AB1_2	AB1_3
evm.TU.scaffold0010.535	0.447489	1.09077	0	1.58293	0	0.480204	19449.7	5685.82	15887.3	29880.3	215388	131036
evm.TU.scaffold0016.48	15939.1	16201.8	18540.5	26479.7	14799.3	33455.1	3.32388	33.3885	106.133	80.3513	241.035	204.707
evm.TU.scaffold0006.200	3159.67	2517.29	3618.6	3921.18	3464.32	3279.26	28805.4	30147.9	23877.9	27614.8	13095.4	25167.4
gene_1864	11291	12023.4	13803.9	11556.4	10045.1	12515	0	0.850395	0	52.4664	0	4.50995
gene_597	5820.39	5710.21	5763.05	4613.58	4047.61	2360.04	5737.53	6719.34	7008.11	4682.53	8923.14	7568.57
evm.TU.scaffold0039.2	5322.83	4777.95	3708.99	4556.48	5936.87	7989.21	7922.03	11281	14853.1	9642.99	8864.44	8654.27
evm.TU.scaffold0011.66	3851.92	3676.45	3458.31	2732.58	3703.06	3671.61	3000.15	3451.79	3455.71	3060.33	4463.38	3925.64
evm.TU.scaffold0009.510	4621.43	4572.24	4782.27	4569.49	4611.42	4467.54	4384.19	6756.07	5571.17	4629.44	5282.68	5281.02
evm.TU.scaffold0001.800	5864.45	5809.19	5836.57	5309.41	5532.81	6391.44	4554.13	6302.69	5928.52	4723.34	6294.85	5819.43
evm.TU.scaffold0008.1529	4768.61	4473.19	4394.41	4227.81	5062.39	6461.93	4253.23	4760.32	5176.69	4453.23	4801.08	5141.46
evm.TU.scaffold0006.215	2385.8	1873.86	2132.49	3542.39	2897.28	2361.01	12565.3	15841	11940	13305.7	2724.22	7882.26
gene_14949	4381.88	3922.39	3880.99	3276.15	3519.55	3735.48	3156	4151.5	3329.27	2956.6	4251.86	3817.87
evm.TU.scaffold0007.1500	660.426	708.786	824.241	820.938	571.767	522.335	17246.5	14380.5	12066.2	10580.1	1679.08	10454.9
evm.TU.scaffold0002.218	7049.86	7955.1	9303.9	7078.94	6025.55	5456.59	0	0.309234	0	19.2243	0	0.894535
evm.TU.scaffold0002.217	4754.04	4667.16	6471.88	4373.05	6112.62	4946.56	0	0	0	11.844	0.345957	4.70505
evm.TU.scaffold0001.462	3066.39	2982.64	3094.28	2425.45	2111.52	2747.21	1944.36	2155.94	2407.39	1960.01	2517.81	2428.26
evm.TU.scaffold0007.1654	2968.67	2984.03	3215.21	2428.82	1942.44	1712.5	2680.67	2229.43	3056.8	2848.84	4003.88	2863.6
evm.TU.scaffold0012.45	3160.7	3037.04	3090.36	2767.19	2792.72	3599.87	3370.65	3135.65	3425.72	2838.05	4124.05	3671.36
evm.TU.scaffold0006.79	2537.21	2613.91	2752.74	2275.57	2399.76	2664.3	1994.22	2775.01	2306.96	2028.59	2486.45	2227.53
evm.TU.scaffold0012.966	1563.56	1528.35	1276.35	1904.35	1788.82	2550.35	3294.36	3902.53	4085.01	3612.3	4812.79	5000.1
evm.TU.scaffold0014.531	2008.05	1878.29	2229.88	1801.63	2144.48	1719.2	2036.71	2945.69	2015.08	2212.83	2969.7	2466.84
evm.TU.scaffold0015.423	2275.27	2373.32	2336.67	2311.6	2008.89	1768.46	3143.58	3859.29	3401.45	3906.16	2493.26	4315.27
evm.TU.scaffold0001.870	2236.63	2226.83	2340.23	2014.2	2348.11	2511.25	1859.35	2256.69	2187.72	1871.67	2555.57	2173.09
evm.TU.scaffold0007.1632	1173.55	1230.08	1299.45	1306.67	1187.17	1172.27	4139.56	8185.25	5539.01	6753.04	3503.47	5386.15
evm.TU.scaffold0005.1664	1155.4	841.558	1064.17	3111.18	2087.85	1903.58	4088.91	11861.3	6302.54	9265.7	1507.84	5237.15
evm.TU.scaffold0007.2663	1867.87	2091.73	2174.34	1608.24	1292.74	1136.45	2281.81	1452.02	2104.2	1910.58	2416.62	2113.41
evm.TU.scaffold0007.1499	356.796	398.134	426.494	836.996	502.006	546.035	7667.72	5314.1	6267.67	7594.25	3233.53	9383.17
evm.TU.scaffold0001.2193	305.686	295.071	285.396	776.079	739.855	406.028	5639.49	11114.7	6062.12	13169.2	2087.9	9792.54
evm.TU.scaffold0007.2286	3183.48	3616.64	3940.29	2243.71	2275.87	1599.36	0.413287	0.431946	1.69366	10.9853	0.796251	6.24754
evm.TU.scaffold0004.216	1944.42	2059.07	2231.49	1483.09	1148.09	945.761	2624.71	2442.11	2601.84	2470.08	2511.97	2334.77
evm.TU.scaffold0002.1885	1479.54	1696.9	1940.66	1196.14	924.155	714.691	2046.52	1790.59	2012.45	2328.52	2984.39	2288.85
evm.TU.scaffold0001.2194	323.495	278.588	272.237	911.702	1005.91	511.249	4183.05	12419	5276.94	10945	2365.6	9972.16
evm.TU.scaffold0010.508	2186.37	2146.75	2227.72	1882.49	1829.34	1634.8	1659.64	1658.09	1948.67	1636.72	2400.08	2101.44
evm.TU.scaffold0007.2165	0.209243	0	0.193901	0	1.00165	1.1227	2413.49	838.804	2546	1392.7	14418.8	9986.39
evm.TU.scaffold0003.440	81.9717	76.9614	134.39	80.8001	97.2588	78.9278	3933.26	10103.7	3994.86	9827.56	3520.46	11530.9
evm.TU.scaffold0001.2205	1866.47	1949.24	2030.03	1712.96	2082.63	2048.96	2440.22	2713.53	2400.09	2398.52	2730.87	2346.65
evm.TU.scaffold0013.253	2305.02	2233.62	2365.31	2015.87	2284.21	2156.32	1936.74	2604.72	2303.5	2185.75	2688.07	2543.39
evm.TU.scaffold0006.678	1819.36	1980.48	2039.3	1841.14	2033.63	2504.54	1882.88	2155.24	1843.34	1825.5	1788.72	2150.22
evm.TU.scaffold0004.1536	2245.61	2169.12	2277.14	2128.81	2348.36	2812.19	1640.01	2759.94	1913.82	1722.53	1730.57	1724.15
evm.TU.scaffold0002.1051	2018.89	1935.35	1956.38	1810.31	2087.15	2096.96	1343.34	2262.37	1637.43	1268.27	1392.09	1443.38
evm.TU.scaffold0007.1086	1160.37	1014.86	1072.22	1094.31	1069.09	929.814	4013.67	7501.81	4527.25	5492.72	3308.63	5150.25
evm.TU.scaffold0008.1364	1942.32	2545.76	2549.12	1564.72	1951.38	2470.07	1920.28	2579.11	2189.69	1701.45	1919.47	2073.1
evm.TU.scaffold0012.569	1848.26	1693.99	1665.95	1727.75	1947.54	2198.78	1448.12	1917.56	1677.61	1419.98	1940.9	1700.01
evm.TU.scaffold0006.156	2008.06	1829.14	1909.45	1675.08	1642.75	1750.6	1818.1	2218.87	2110.13	2021.77	2548.28	2177.47
evm.TU.scaffold0001.1616	1379.12	1492.62	1547.77	1113.42	1610.96	1982.12	1852.97	1971.03	1885.05	1737.49	2095.56	1802.34
evm.TU.scaffold0007.1816	1861.74	2023.24	2186.28	1517.48	1192.41	1215.87	2055.86	1291.41	2127.59	1769.56	2138.52	2082.76
evm.TU.scaffold0011.702	2148.98	2043.87	2127.71	1637.55	1695.49	1644.59	2341.06	2481.32	2703.09	2125.86	2418.41	2481.94
evm.TU.scaffold0007.710	1920.24	1843.13	2011.35	1626.36	1812.61	1580.01	1442.7	1720.61	1542.15	1318.95	1995.1	1571.03
evm.TU.scaffold0010.187	1166.44	935.552	918.818	977.305	1119.17	1237.96	4713.55	6136.83	4731.05	4801.72	3945.11	4201.33
evm.TU.scaffold0007.1187	1442.24	1599.07	1703.59	1325.54	1673.7	2062.36	1690.27	1861.22	1860.3	1423.94	2187.74	1805.25
evm.TU.scaffold0007.452	650.478	877.384	776.97	2201.68	1527.17	1319.97	5198.14	7946.01	5622.35	5203.45	1306.68	5828.25
evm.TU.scaffold0013.280	1332.93	1889.91	1956.83	1428.2	1311.58	1145.63	1856.4	1355.14	2223.51	1711.58	2636.43	2033.15
evm.TU.scaffold0008.385	2071.23	1905.84	1967.53	1839.22	2166.87	2827.44	1807.66	2224.94	1951.22	1641.91	2197.79	1962.38
evm.TU.scaffold0006.599	1882.31	2002.57	2160.2	1743.41	1745.37	1645.82	1491.99	1217.92	1446.56	1405.91	1760.69	1523.83
evm.TU.scaffold0003.487	1819.2	1641.54	1660.37	1538.43	1699.92	2036.93	1528.13	2385.16	1825.79	1630.8	1881.33	1802.72
evm.TU.scaffold0009.685	1368.7	1191.28	1099.07	1165.19	794.032	688.304	2544.26	1473.11	2504.8	1959.6	2188.81	2152.53
evm.TU.scaffold0013.61	1791.27	1847.68	2017.51	1599.28	1396.11	1122.05	2599.61	1982.24	2060.68	1918.3	2528.57	2134.46
evm.TU.scaffold0007.1453	1634.6	1604.93	1782.21	1364.63	1432.6	1773.7	1299.83	1300.99	1420.24	1307.37	1874.04	1581.57
evm.TU.scaffold0006.277	1922.51	1793.06	1934.98	1546.11	1635.89	1506.33	1798.75	2318.52	2032.93	1746.78	1870.05	1847
evm.TU.scaffold0009.982	1591.13	1537.3	1755.54	1269.93	1477.49	1450.34	1189.86	1950.46	1488.03	1510.46	1880.84	1498.51
evm.TU.scaffold0007.2022	1534.06	1620.74	1689.69	1447.59	1814.31	1817.95	1348.08	1377.85	1443.36	1291.73	1714.27	1522.44
evm.TU.scaffold0001.842	1425.07	1351.92	1462.03	1337.7	1351.33	1381.45	1316.55	1308.94	1302.17	1181.81	1472.69	1430.87
evm.TU.scaffold0011.1419	1681.1	1645.3	1738.89	1436.91	1444.87	1558.19	1168.83	1536.4	1605	1201.69	1962.66	1378.18
evm.TU.scaffold0003.960	1810.48	1534.66	1543.65	1618.77	2395.7	2232.91	1673.44	2110.77	1962.8	1469.59	1939.86	1867.09
gene_8986	1777.04	1794.95	2160.34	1169.43	1709	2094.1	322.965	467.288	368.064	596.795	460.595	278.565
evm.TU.scaffold0007.2454	360.922	372.354	426.048	1027.65	655.911	386.959	5848.32	9498.07	6143.12	2991.63	1017.83	3038.83
evm.TU.scaffold0004.189	4258.44	4180.71	3215.04	4265.88	4029.19	4172.17	445.932	471.092	362.143	561.764	693.522	320.528
evm.TU.scaffold0005.682	1847	1839.22	1984.12	1560.95	1329.72	1120.5	1608.44	1727.42	1747.03	1563.82	1853.54	1696.79
evm.TU.scaffold0002.225	3131.22	4066.52	4433.35	2366.52	2079.88	2693.91	0.572244	0.29904	0	19.9989	0	0
evm.TU.scaffold0013.656	761.649	1240.66	1764.35	1619.68	1695.12	1837.98	1677.21	2339.85	1512.91	1459	1533.41	1914.76
evm.TU.scaffold0011.1001	1198.95	1306.04	1260.71	1227.47	672.097	512.593	2366.75	1393.34	2059.86	2141.6	2485.18	2302.35
evm.TU.scaffold0001.2182	2905.98	2840.23	2349.21	2943.15	3007.08	3393.61	1703.17	1400.51	1781.29	1808.89	1418.4	1549.09
evm.TU.scaffold0011.626	852.932	909.419	829.87	952.993	877.492	753.69	3480.21	3870.45	2442.08	3255.32	3354.98	3498.93
evm.TU.scaffold0007.1856	1480.84	1403.76	1466.8	1486.88	1077.55	695.175	1222.23	1276.43	1358.12	1090.49	1525.27	1304
evm.TU.scaffold0009.84	1631.72	1670.34	1776.63	1317.8	1404.41	1611.22	1333.83	1107.11	1346.9	1138.76	1726.22	1487.75
evm.TU.scaffold0011.812	1613.27	1539.8	1567.29	1231.53	1276.96	1881.06	1224.57	1352.61	1561.06	1299.7	1481.94	1390.7
evm.TU.scaffold0007.1655	1679.8	1684.11	1864.17	1326.27	1209.15	1110.48	1404.86	1402.91	1700.33	1288.88	2066.65	1619.6
evm.TU.scaffold0004.362	1731.51	2073.73	1979.8	1783.95	1513.72	1030.09	1333.76	880.12	1434.93	1342.59	2258.73	1780.28
evm.TU.scaffold0004.1594	1588.68	1528.39	1540.67	1356.7	1397.49	1465.34	1335.64	1515.9	1532.02	1264.33	1557.07	1475.69
evm.TU.scaffold0005.2190	4079.57	3225.99	3006.24	2606.78	3377.46	1654.79	0.344406	0.503938	4348.06	3.25491	4.97657	0.694171
evm.TU.scaffold0002.1184	1378.6	1390.5	1368.61	1042.74	1048.43	1078.48	1514.26	1797.11	1769.89	1295.01	1570.4	1522.29
evm.TU.scaffold0008.303	3301.83	3574.71	2457.8	3444.93	3633.9	4396.27	182.367	193.618	125.58	192.094	395.885	108.569
evm.TU.scaffold0014.670	1555.6	2140.9	2068.81	1818.59	1650.73	990.878	1.28672	0.711958	3.64458	5.06688	17.0615	4.11902
evm.TU.scaffold0007.769	1211.96	1085.56	1158.66	1174.62	1442.62	1956.46	1046.73	1359.54	1246.93	1020.31	1255.44	1126.37
evm.TU.scaffold0009.478	1566.9	1444.53	1563.14	1449.9	1468.2	1574.66	1234.07	1546.47	1404.66	1094.16	1522.13	1291.85
evm.TU.scaffold0005.365	1536.75	1438.69	1491.89	1292.19	1388.03	1641.45	1301.5	1684.99	1721.27	1226.83	1544.72	1488.18
evm.TU.scaffold0007.458	1224.93	1288.87	1393.89	1129.43	1096.6	1288.45	1350.19	1248.66	1413.9	1275.53	1382.79	1321.88
evm.TU.scaffold0003.707	1241.78	1191.77	1174.17	906.795	1017.31	1270.62	1168.58	1376.8	1318.97	1202.69	1468.16	1422.14
gene_8530	892.951	1003.47	992.918	1035.28	1082.41	1265.52	2365.66	2975.51	2058.18	2010.31	1102.53	2068.06
evm.TU.scaffold0010.501	794.802	864.236	831.729	756.408	519.115	494.419	1847.61	1769.18	1769.16	2134.07	1542.04	2296.32
evm.TU.scaffold0013.311	451.505	456.329	402.456	399.865	423.38	378.064	4205.65	3902.94	2746.5	2815.34	5702.53	3569.4
evm.TU.scaffold0007.2053	1203.79	1191.86	1083.52	979.376	1056.79	1224.95	90.2529	85.8678	190.182	133.342	874.357	192.515
evm.TU.scaffold0016.26	1436.01	1490.01	1634.67	1268.98	1159.26	1085.64	2468.75	1983.46	1979.91	1985.58	1563.66	1985.01
evm.TU.scaffold0004.1027	1194.76	866.29	888.311	1150.58	1301.95	1530.67	1102.08	1388.9	1263.88	1216.73	1368.46	1214.79
evm.TU.scaffold0010.349	1823.18	1545.37	1450.37	1625.52	1510.22	1234.01	1153.6	1623.5	3027.39	1156.3	827.769	1273.84
evm.TU.scaffold0002.1402	1241.51	1220.96	1336.37	1179.33	1091.8	1122.7	1157.85	1250.27	1180.3	988.747	1368.2	1188.4
evm.TU.scaffold0002.1936	992.507	1095.69	1169.1	746.513	495.752	349.533	811.489	753.051	831.706	827.358	1170.8	939.445
evm.TU.scaffold0012.459	1252.19	1183.01	1209.31	1000.45	808.004	526.707	1035.16	1436.67	1224.57	1071.77	1554.84	1229.34
evm.TU.scaffold0007.1611	1097.03	1155.42	1230.77	1074.42	1045.5	977.71	1184.62	1219.1	1179.5	955.995	1220.39	1217.72
evm.TU.scaffold0002.2072	986.549	978.743	1043.69	934.667	960.844	1106.08	665.255	800.469	740.696	586.088	873.885	755.814
evm.TU.scaffold0007.186	915.765	1065.3	1130.17	768.567	936.862	868.584	1191.09	1432.55	1369.75	1372.96	1444.4	1359.47
evm.TU.scaffold0008.895	1762.12	1709.12	1765.48	1518.16	1923.11	1870.63	1199.44	909.162	1172.5	1099.26	1471.56	1388.05
evm.TU.scaffold0009.1357	310.152	328.427	428.387	432.792	457.173	642.105	2846.53	1848.29	2711.59	2087	3760.65	3151.8
evm.TU.scaffold0001.1369	1437.76	1321.73	1364.22	1275.99	1546.68	1717.58	960.752	1212.59	1102.83	935.987	1170.09	1084.08
evm.TU.scaffold0009.696	477.411	433.634	401.405	455.446	488.531	574.874	2661.25	1746.18	2222.34	1282.48	4179.61	5256.1
evm.TU.scaffold0005.1243	953.503	994.07	998.691	835.323	560.349	431.242	912.509	929.448	954.311	878.06	968.278	991.006
evm.TU.scaffold0008.379	1098.82	1116.99	1243.56	894.465	725.795	672.645	1161.33	945.687	1340.38	970.033	1417.57	1229.36
evm.TU.scaffold0007.1944	1186.02	1201.1	1265.47	1031.34	1092.66	1303.84	890.087	806.556	1114.89	944.899	1295.33	1023.86
evm.TU.scaffold0007.2166	0.19151	0.560174	1.06481	0.580665	0.183354	1.02755	902.031	488.905	1185.92	515.69	7406.39	4099.84
evm.TU.scaffold0008.1181	1262.1	1226.17	1250.66	978.366	1307.05	1192.86	1503.26	1528.35	1154.36	1550.93	1146.14	1535.54
evm.TU.scaffold0013.130	243.882	231.391	254.448	473.735	240.242	245.284	3213.39	3861.36	3284.59	3741.05	1256.61	3999.91
evm.TU.scaffold0002.1632	1203.32	1108.4	1209.04	1065.07	1137.77	1312.12	870.257	885.871	957.142	713.508	1112.53	1012.23
evm.TU.scaffold0010.1321	980.284	1009.76	1034.98	911.366	938.248	990.683	1271.11	1110.62	1258.67	1076.96	1295.81	1238.47
evm.TU.scaffold0002.1606	969.064	938.714	995.658	890.023	890.714	586.286	1285.31	1264.16	1198.5	1160.09	1224.69	1061.63
evm.TU.scaffold0010.1280	859.562	814.592	735.872	918.785	671.344	632.647	1749.46	1566.93	1825.68	1947.88	813.133	1825.78
evm.TU.scaffold0003.1067	1141.31	994.951	1035.85	937.642	731.172	904.298	940.474	1205.74	1131.43	908.578	1052.66	1076.06
evm.TU.scaffold0014.512	897.917	1492.3	1402.4	1011.5	690.387	390.584	48.1963	14.6195	26.8171	35.9945	44.6938	47.3152
evm.TU.scaffold0014.483	289.861	310.433	243.521	398.673	280.086	267.353	3235.17	2481.74	2504.3	3358.86	1381.24	3895.55
evm.TU.scaffold0007.1219	1084.04	1188.23	1180.87	1209.95	1195.28	1257.53	1140.33	1218.38	1089.69	1174.18	1014.69	1374.21
evm.TU.scaffold0015.59	2468.66	1895.9	1680.36	1712.7	2414	1905.6	0.149638	0.469183	1991.75	1.91507	6.1984	4.52408
evm.TU.scaffold0010.615	1047.35	1409.13	1544.2	1496.24	1480.9	1080.96	0	0	0	5.85591	0	1.52495
evm.TU.scaffold0009.411	818.679	773.203	703.436	929.363	833.064	963.44	1659.6	2104.3	1684.15	1736.61	1543.52	1797.88
evm.TU.scaffold0014.515	796.532	964.648	917.829	745.437	606.007	592.862	97.949	68.1612	122.706	128.162	372.645	164.435
evm.TU.scaffold0002.2037	676.642	701.429	746.8	693.969	521.088	487.617	1469.79	1170.98	1289.85	1240.81	880.471	1491.22
evm.TU.scaffold0002.972	1279.17	1286.65	1353.93	1096.18	942.368	1023.72	980.519	998.77	978.785	1073.31	1294.59	1037.81
evm.TU.scaffold0002.226	2216.68	2517.83	2653.27	1197	1023.57	1249.11	0	0	0	17.7097	0	0
evm.TU.scaffold0006.867	2186.91	2256.16	1625.06	2056.45	2198.68	2891.74	242.342	275.308	167.171	262.853	460.4	168.91
evm.TU.scaffold0005.24	751.347	774.818	680.2	854.677	881.86	1135.93	972.965	1413.83	1103.51	1132.65	1181.68	1302.51
evm.TU.scaffold0007.2589	584.761	596.071	630.95	647.163	613.819	669.879	1331.57	1344.78	1310.69	1181.35	718.965	1113.03
evm.TU.scaffold0010.1116	1085.84	933.22	746.289	852.02	1169.11	1397.18	1351.62	1792.64	1138.39	1338.78	3006.01	1636.38
evm.TU.scaffold0004.1233	202.665	142.617	173.527	187.076	160.596	77.4907	3429.2	4454.95	3345.31	3452.57	794.754	3581.72
evm.TU.scaffold0008.537	834.542	799.62	864.395	745.983	875.282	1153.08	883.305	1020.92	942.399	799.78	959.353	961.999
evm.TU.scaffold0011.315	838.062	639.778	802.921	946.446	797.62	641.154	2665.63	3134.43	1985.35	1578.27	641.729	1927.02
evm.TU.scaffold0007.1390	447.141	405.342	474.413	485.84	423.092	375.616	2491.67	2197.21	1603.81	1881.58	728.251	1690.71
novel.1451	23.0608	22.7969	17.0169	10.1429	13.697	11.2277	865.989	552.566	807.944	1642.82	3290.07	4898.31
evm.TU.scaffold0014.205	1386.9	1309.79	1332.76	1289.01	1184.91	1352.17	665.751	505.321	658.508	656.714	996.868	807.11
evm.TU.scaffold0002.2064	535.617	704.3	675.634	506.476	318.842	282.495	1234.71	649.761	1465.73	1397.64	546.081	1219.92
gene_1464	733.382	778.403	729.675	593.113	559.825	562.682	976.798	889.513	1165.79	1161.87	699.158	1027.04
evm.TU.scaffold0015.723	633.184	808.249	714.522	778.738	872.295	807.138	524.247	610.976	1047.64	1278.29	1004.84	1439.15
evm.TU.scaffold0005.1841	176.97	189.145	151.213	255.684	159.037	114.323	2489.75	3687.84	2744.08	2711.05	1382.44	2542.86
evm.TU.scaffold0012.888	686.223	586.578	786.152	545.625	536.113	504.462	1897.68	2863.02	1322.28	1409.63	537.802	1060.27
evm.TU.scaffold0005.1886	833.954	710.889	888.572	726.574	621.835	531.044	742.387	976.063	867.689	785.627	1065.79	900.141
evm.TU.scaffold0005.1025	903.17	871.124	912.878	753.958	712.166	897.261	783.876	893.76	879.835	819.951	1081.6	965.591
evm.TU.scaffold0008.484	714.222	692.316	718.986	665.951	796.916	1061.69	1129.87	1336.76	1044.54	858.012	848.604	1101.38
evm.TU.scaffold0002.1979	1190.6	1143.23	1189.58	1051.31	960.838	889.836	1225.96	1325.12	1268.17	1136.69	1064.71	1152.38
evm.TU.scaffold0008.475	1170.84	1417.76	1590.62	1323.07	1466.88	1300.54	0.127633	0.0666976	0.0653804	2.63863	0.430327	4.11603
evm.TU.scaffold0007.1357	2479.62	2303.02	1890.03	1866.74	1691.02	1012.78	0.0879631	0.643542	12.9771	0.519576	4.06733	0.35459
evm.TU.scaffold0008.435	1608.22	1826.76	2164.58	1537.83	1386.64	1175.54	0	0	0	7.51764	0.0886286	0.0463599
evm.TU.scaffold0002.820	1031.14	1053.6	718.302	711.857	543.012	482.292	621.613	637.689	957.882	346.307	871.552	546.813
evm.TU.scaffold0006.195	678.112	739.581	745.727	805.931	685.662	675.977	302.298	263.722	450.34	446.117	615.982	506.272
gene_4571	527.349	662.688	640.069	556.516	558.896	522.214	1408.19	1952.25	1109.36	1503.51	439.029	1615.44
evm.TU.scaffold0001.974	1414.45	1859.66	2012.2	1414.88	1988.59	1073.92	1.33036	2.78085	3.31006	9.1678	26.1804	5.17132
evm.TU.scaffold0008.437	1458.52	1731.35	2033.23	1617.83	1010.73	788.468	0	0	0	5.17352	0	0
gene_11072	1279.88	1594.43	1955.79	1472.34	1559.08	1155.44	0	0	0	4.14261	0	0
evm.TU.scaffold0006.905	676.857	679.588	630.258	690.688	854.481	939.918	646.535	890.148	953.88	820.547	468.095	770.751
evm.TU.scaffold0010.480	731.06	685.641	698.649	628.805	713.298	653.039	798.744	1102.33	754.362	688.039	943.632	817.976
evm.TU.scaffold0011.227	1522.36	1196.65	1000.37	875.986	589.406	248.678	0.323442	0.169023	2294.9	0	1.09052	0.162979
evm.TU.scaffold0010.605	1131.28	1312.22	1126.95	1053.19	946.655	956.539	169.11	92.8619	189.601	193.926	904.553	262.264
evm.TU.scaffold0015.84	1162	923.438	812.837	923.598	932.496	657.329	813.862	1006.19	3089.22	861.431	510.92	886.258
evm.TU.scaffold0001.431	1444.77	1243.08	1362.81	1144.68	1398.74	1439.52	100.525	91.7374	169.401	153.927	883.814	154.733
evm.TU.scaffold0007.1095	911.718	924.15	916.112	904.35	937.302	918.521	569.963	688.765	762.07	555.72	674.863	642.872
evm.TU.scaffold0014.514	818.534	897.135	934.947	848.093	669.368	480.284	598.162	478.027	619.667	685.951	825.039	629.752
novel.1938	788.9	637.454	526.086	562.553	663.789	700.259	879.971	1607.23	1949.36	1333.79	913.85	1060.57
evm.TU.scaffold0004.1530	447.928	555.166	577.756	513.277	434.453	387.788	1180.5	1045.5	900.05	1381.63	571.957	999.451
evm.TU.scaffold0013.403	425.955	473.097	445.892	491.049	489.866	630.736	699.808	1016.88	900.162	1048.51	533.109	921.359
evm.TU.scaffold0004.61	610.151	567.509	637.321	564.721	586.845	581.363	731.343	949.913	870.839	693.777	706.732	692.217
evm.TU.scaffold0007.1529	457.976	553.668	533.139	387.433	380.71	407.583	660.482	439.896	620.627	633.756	708.046	678.621
evm.TU.scaffold0002.736	477.874	410.311	402.728	626.337	492.125	474.421	2176.85	1878.2	1728.07	2012.27	454.415	1821.14
evm.TU.scaffold0005.960	712.07	968.501	929.661	907.709	727.1	546.946	19.8677	18.1418	41.2448	39.9413	155.226	55.6408
evm.TU.scaffold0006.1184	972.395	860.094	878.788	1063.8	968.972	952.473	1276.05	2059.98	1005	1150.56	161.017	664.504
evm.TU.scaffold0008.471	862.093	905.578	1160.97	1095.29	1257.41	940.379	0.12701	0	0	3.81361	0.0611754	2.36797
evm.TU.scaffold0008.721	499.42	544.473	587.288	422.784	302.42	317.679	593.935	478.338	606.416	531.446	804.014	599.723
evm.TU.scaffold0015.578	756.837	799.777	767.833	787.143	845.734	986.922	827.057	715.826	834.707	795.467	888.945	980.046
evm.TU.scaffold0008.1508	775.448	732.388	812.32	674.15	873.452	945.943	913.053	964.469	758.994	981.424	993.036	1018.83
evm.TU.scaffold0003.929	226.688	273.124	268.965	334.503	126.434	87.9073	1188.21	1507.18	1402.12	1480.01	938.22	1455.48
evm.TU.scaffold0005.726	775.987	775.715	721.928	783.781	609.595	430.76	1021.21	1283.93	1074.4	1065.05	674.587	1028.68
evm.TU.scaffold0010.617	956.391	1274.79	1498.98	1017.63	1007.91	853.132	0.0483961	0	0.0495822	4.85968	0	0.0975453
evm.TU.scaffold0015.96	414.442	403.255	476.317	316.09	267.589	186.681	1203.85	959.63	879.778	1006.92	1313.01	1298.12
evm.TU.scaffold0003.961	936.26	781.817	814.65	510.621	1137.04	1025	641.874	664.993	759.053	870.162	1266.44	704.273
evm.TU.scaffold0012.63	625.217	663.285	664.707	651.056	466.163	329.191	547.677	643.094	600.345	574.078	678.22	651.92
evm.TU.scaffold0004.624	657.5	709.899	666.333	739.782	572.214	530.966	658.118	799.792	720.739	710.384	432.125	728.464
evm.TU.scaffold0007.1132	144.462	96.2446	90.7029	212.141	164.856	169.306	1655.51	2434.28	1609.19	1757.32	363.918	2337.26
evm.TU.scaffold0008.1012	481.774	562.245	535.266	592.855	611.478	625.692	931.426	780.095	781.716	736.978	626.514	890.288
gene_6228	972.137	1116.23	1148.89	1021.91	1137.17	777.344	0.716617	1.99726	0.978906	11.9932	3.22153	6.9812
evm.TU.scaffold0007.1388	280.483	392.391	385.567	329.829	242.766	213.26	483.601	400.586	451.125	568.437	404.999	615.089
gene_1879	1035.02	1048.34	1523.48	914.358	1195.74	984.203	0	0	0	3.05841	0	0
evm.TU.scaffold0010.967	313.464	378.409	200.688	287.743	262.579	259.588	934.376	1331.77	938.078	855.579	967.173	1085.57
evm.TU.scaffold0014.164	72.575	83.8969	83.7653	209.728	74.2688	76.948	3650.7	1732.45	2050.14	1980.11	847.72	2411.28
evm.TU.scaffold0010.613	1084.94	1273.26	1556.3	1355.04	1426.6	1255.81	0.102508	0	0	3.73386	0.197495	2.94422
evm.TU.scaffold0011.1313	496.639	479.153	458.007	489.417	589.05	686.831	1085.28	1664.86	1061.23	1892.43	774.765	1095.42
evm.TU.scaffold0010.584	222.675	270.851	205.838	280.48	224.537	195.185	1128.8	913.614	975.271	708.956	1958.22	839.35
evm.TU.scaffold0002.2082	464.934	563.224	509.531	583.691	408.903	292.438	844.588	724.436	827.563	752.441	496.74	822.746
evm.TU.scaffold0008.1119	636.322	583.911	609.191	512.505	496.023	394.329	563.353	666.123	626.84	515.175	838.827	688.59
evm.TU.scaffold0008.467	1035.72	1267.5	1338.75	1251.77	1362.57	973.245	0	0	0	4.87333	0	0.0647893
evm.TU.scaffold0008.781	840.587	835.665	837.348	600.828	653.494	707.861	519.982	321.188	508.387	574.204	900.934	663.079
evm.TU.scaffold0015.228	640.398	596.261	597.182	510.48	459.21	466.277	460.736	608.056	564.94	483.23	629.826	547.158
evm.TU.scaffold0005.107	557.345	478.667	576.795	439.544	497.456	572.851	1477.01	1291.14	1474.49	1170.46	1690.34	1048.58
evm.TU.scaffold0003.1172	462.688	488.472	513.595	578.923	384.859	295.936	1613.64	802.773	1434.36	1175.18	1088.09	906.603
evm.TU.scaffold0003.324	417.044	360.014	372.633	676.917	524.446	488.572	1162.18	2211.43	1714.52	1571.35	322.092	1493.23
evm.TU.scaffold0007.1364	354.808	379.287	421.986	376.657	413.658	355.14	1391.31	1471.67	1181.5	1593.76	636.629	1719.69
evm.TU.scaffold0009.1519	193.533	285.023	207.802	231.323	79.8858	66.8437	1515.16	518.784	1403.53	1395.65	1956.71	1559.58
evm.TU.scaffold0010.616	1045.56	1352.75	1628.08	1083.32	1083.48	721.271	0	0	0	4.4303	0	0.161973
evm.TU.scaffold0012.537	537.335	490.45	418.827	524.744	566.269	526.022	684.679	959.497	836.152	677.835	567.904	919.685
evm.TU.scaffold0008.1048	556.32	530.417	574.439	632.078	548.633	483.823	798.259	901.114	658.639	689.366	735.736	884.683
evm.TU.scaffold0008.430	811.368	554.407	497.815	507.49	449.38	904.115	130.013	88.6097	282.184	207.474	1169.07	278.141
evm.TU.scaffold0006.791	382.894	285.491	403.511	443.23	506.218	606.038	1080.92	1632.94	1362.66	1522.21	1242.54	1145.72
evm.TU.scaffold0001.2287	702.389	707.321	756.88	488.485	294.732	285.56	598.056	507.043	686.206	574.114	755.528	637.249
evm.TU.scaffold0008.436	864.831	1015.84	1291.42	1072.05	1140.32	1084.57	0.319473	0	0	1.7298	0.153877	0
evm.TU.scaffold0002.227	1471.16	1663.86	2178.77	1130.62	993.708	631.225	0	0.161021	0	1.36504	0.148414	0.310529
evm.TU.scaffold0002.2088	232.98	227.869	249.675	310.175	250.556	288.813	1288.58	1440.69	1015.55	1312.71	450.18	976.455
evm.TU.scaffold0010.604	655.211	1088.8	918.223	1049.74	1124.88	1110.69	0.104567	0	0	7.10296	0	5.90129
evm.TU.scaffold0011.444	545.259	561.956	613.447	634.058	628.23	532.616	917.27	960.431	1003.38	1105.49	675.6	851.466
evm.TU.scaffold0011.710	455.659	503.445	596.235	425.619	406.044	255.009	617.194	610.487	586.519	884.561	896.481	619.521
evm.TU.scaffold0010.482	625.06	616.605	597.639	661.568	650.79	646.277	651.862	747.601	773.48	717.32	416.435	706.388
evm.TU.scaffold0004.1331	376.766	409.52	398.066	407.96	472.816	586.397	855.408	743.655	669.18	601.699	630.291	780.178
evm.TU.scaffold0008.480	485.13	615.881	514.615	529.027	407.646	378.689	136.926	177.819	210.116	230.264	1026.11	244.977
evm.TU.scaffold0003.1171	341.798	365.102	345.941	449.295	562.191	755.359	1169.63	841.997	1062.21	820.438	657.126	711.341
evm.TU.scaffold0005.1939	523.054	487.909	505.408	567.786	581.911	561.385	1003.17	1137.26	894.175	1136.42	838.771	1178.6
evm.TU.scaffold0010.362	301.017	325.583	337.704	485.616	342.811	283.234	965.9	753.235	877.433	940.436	809.683	953.8
gene_2649	918.438	1091.47	1147.59	1081.63	758.617	311.935	0	0	0	0	0	0
evm.TU.scaffold0009.439	416.556	445.849	454.726	462.894	438.597	529.819	591.414	530.333	474.622	508.042	538.741	560.949
evm.TU.scaffold0005.6	402.659	336.236	316.549	274.647	167.999	305.143	222.907	106.291	352.297	375.326	1826.65	249.729
evm.TU.scaffold0009.425	1103.82	902.06	837.433	756.027	942.18	637.4	321.581	258.281	1455.62	313.795	345.426	304.749
evm.TU.scaffold0013.229	351.079	400.8	425.807	341.505	372.444	291.87	819.858	923.934	744.683	820.238	523.734	768.135
evm.TU.scaffold0008.1274	196.525	235.253	180.894	221.285	152.039	144.464	1652.29	2425.63	2378.45	752.317	1473.1	1144.95
evm.TU.scaffold0008.1034	382.8	411.737	473.401	420.108	364.529	309.62	866.062	725.395	688.705	742.305	572.83	731.265
evm.TU.scaffold0002.1558	211.399	237.159	193.733	297.251	182.998	230.199	728.525	817.183	451.376	753.694	1326.25	704.594
evm.TU.scaffold0003.1165	641.911	728.595	707.194	519.753	554.927	578.074	134.76	83.8443	185.645	183.237	946.333	201.053
evm.TU.scaffold0015.798	546.531	594.344	585.824	553.239	487.562	571.813	634.177	484.281	653.967	502.363	560.588	748.583
evm.TU.scaffold0011.1012	445.539	510.875	512.036	413.35	334.081	241.79	427.059	240.378	366.915	394.538	485.654	575.215
evm.TU.scaffold0002.1471	342.378	370.193	339.508	348.38	369.586	379.7	782.718	987.11	843.375	810.055	684.427	891.43
evm.TU.scaffold0008.482	669.477	776.475	792.755	668.607	659.698	637.491	48.1198	55.2304	54.8236	42.7713	251.066	74.6822
evm.TU.scaffold0008.428	592.514	780.993	805.939	682.551	788.289	794.291	0.230928	0.120677	0.295734	6.13814	0.500526	6.4581
evm.TU.scaffold0007.1351	392.942	372.06	353.529	446.864	420.025	525.218	1254.5	911.221	791.927	1136.15	1027.51	1119.34
evm.TU.scaffold0007.1231	467.714	513.848	481.651	394.915	295.82	262.932	240.015	221.824	384.446	324.522	1043.71	416.972
evm.TU.scaffold0002.65	430.359	480.863	503.743	474.358	436.994	455.426	564.518	923.435	631.704	764.184	731.234	811.123
evm.TU.scaffold0014.673	486.878	519.22	478.928	481.456	418.002	376.849	732.814	553.913	696.089	1054.77	1063.47	1033.19
evm.TU.scaffold0009.1041	393.221	463.831	469.038	385.806	471.622	390.003	569.487	2071.56	639.295	996.242	590.208	543.504
evm.TU.scaffold0002.17	742.117	783.464	653.353	765.933	667.386	629.447	754.367	704.963	430.303	723.612	808.617	442.046
evm.TU.scaffold0008.470	737.35	942.322	921.991	1124.86	937.187	825.67	0	0	0	4.14556	0	0.0597715
evm.TU.scaffold0001.1684	548.143	525.185	545.183	455.135	590.227	635.311	459.611	502.842	467.783	427.331	446.991	478.272
evm.TU.scaffold0015.426	261.188	285.972	239.833	371.683	242.776	279.516	1007.77	1042.67	1147.03	1699.83	502.958	1569.13
evm.TU.scaffold0008.510	379.546	331.912	319.636	381.145	318.837	285.608	1306.92	1148.29	1196.22	1239.8	1176.35	1143.07
evm.TU.scaffold0007.1395	289.03	323.397	333.203	336.916	263.47	244.799	1131	1066.69	829.536	905.78	387.508	835.943
gene_7579	363.652	354.566	318.529	293.608	304.039	330.889	430.982	623.384	646.874	520.406	415.171	556.557
evm.TU.scaffold0007.2126	359.233	376.596	411.365	458.89	223.569	146.059	648.234	965.579	833.983	776.928	337.597	656.897
evm.TU.scaffold0007.1960	424.304	430.623	457.024	453.501	497.795	465.994	9.16506	13.7152	27.9556	28.2982	142.666	28.5488
gene_2702	346.795	311.859	347.948	274.952	376.129	321.783	466.665	753.58	372.427	580.673	802.621	518.738
evm.TU.scaffold0001.2180	322.609	334.048	329.284	312.665	261.37	312.466	325.913	351.575	315.197	291.974	320.299	411.993
evm.TU.scaffold0005.973	336.088	402.463	353.775	437.595	424.199	375.879	611.872	735.609	525.842	694.257	776.738	714.054
evm.TU.scaffold0007.431	180.484	179.353	131.651	374.872	174.24	99.7495	1077.07	1739.61	1369.68	1531.79	278.743	1402.95
evm.TU.scaffold0004.1397	270.493	277.756	269.826	357.403	355.482	411.814	791.212	556.787	513.781	520.105	643.009	536.085
evm.TU.scaffold0008.402	183.517	167.309	196.872	225.132	178.435	130.179	1366.8	2318.46	1133.84	1593.58	357.899	1401.52
evm.TU.scaffold0007.1514	1295.73	968.206	805.145	780.548	955.314	576.674	0.613439	0	2133.53	1.67752	3.34863	6.3195
evm.TU.scaffold0012.186	364.462	232.799	236.348	230.164	273.98	203.719	1481.4	1953.17	1448.19	1175.98	423.352	769.609
evm.TU.scaffold0002.180	410.463	405.973	374.4	373.329	424.728	457.016	491.055	608.978	541.482	437.308	325.244	499.535
evm.TU.scaffold0008.1404	652.681	658.53	630.711	604.733	579.303	399.994	395.53	407.731	389.938	439.639	470.356	432.955
evm.TU.scaffold0013.526	998.047	849.643	781.369	717.24	677.54	304.022	160.242	67.7929	1309.05	102.889	189.654	181.744
evm.TU.scaffold0002.15	596.311	628.938	522.638	848.499	638.234	722.596	515.394	460.364	337.778	663.251	606.091	375.696
evm.TU.scaffold0010.878	199.907	230.081	203.977	208.191	289.17	324.581	875.747	472.819	535.556	592.75	1127.24	1051.86
evm.TU.scaffold0005.665	355.364	342.702	301.268	399.25	464.565	537.982	407.542	618.299	479.467	561.383	529.196	668.267
gene_17455	274.655	331.633	176.122	190.915	171.976	149.233	612.205	1228.75	1696.27	1227.73	765.962	925.117
evm.TU.scaffold0007.1362	705.427	572.871	505.343	470.338	600.208	440.924	3.64078	0.115308	1522.07	0.651672	1.91303	3.002
evm.TU.scaffold0004.1052	537.013	502.515	497.943	548.848	556.905	617.594	475.858	581.731	627.012	539.484	350.965	529.72
evm.TU.scaffold0005.1840	484.103	592.702	594.501	359.849	170.682	136.61	44.5524	16.9323	54.8324	74.6189	300.147	82.5092
gene_7408	526.215	508.57	508.148	590.098	573.126	462.24	236.459	304.337	273.285	219.707	286.65	252.758
evm.TU.scaffold0008.279	454.918	469.184	463.857	449.326	399.483	420.497	534.696	501.922	547.975	513.654	470.982	592.88
evm.TU.scaffold0001.1971	300.645	291.836	274.701	304.974	337.899	418.436	326.995	378.576	473.093	333.222	254.016	400.284
evm.TU.scaffold0014.750	487.903	483.012	461.34	393.087	405.605	305.174	628.184	663.759	566.768	740.87	395.569	644.611
evm.TU.scaffold0008.468	598.575	692.22	737.617	864.71	784.508	569.406	0	0	0	2.51298	0	0.0643129
evm.TU.scaffold0002.1034	384.775	359.38	375.235	310.934	307.249	314.693	422.492	449.82	474.403	414.896	512.331	442.559
evm.TU.scaffold0011.124	179.044	183.059	76.0006	297.5	373.538	266.52	1403.7	994.768	1411.77	933.218	466.572	1128.9
evm.TU.scaffold0008.466	760.678	910.096	1003.23	939.709	1194.18	845.266	0	0	0	0.217224	0	0
evm.TU.scaffold0009.1199	464.468	443.902	449.959	518.761	542.913	580.229	531.157	768.303	735.524	721.126	620.192	693.252
evm.TU.scaffold0007.2052	381.587	344.352	266.254	266.406	235.211	242.676	58.0255	41.7908	163.29	105.276	701.397	159.125
evm.TU.scaffold0008.1566	519.881	924.336	929.795	4.93827	5.49665	4.32573	418.986	644.866	509.713	5.6807	534.177	486.214
evm.TU.scaffold0008.419	358.255	342.668	314.524	572.751	393.202	323.493	827.256	815.433	1029	1097.54	360.831	1018.79
evm.TU.scaffold0012.735	477.073	409.36	504.551	293.307	340.605	351.275	741.372	818.288	712.275	773.02	518.359	640.187
evm.TU.scaffold0001.396	341.311	295.806	325.674	289.563	303.895	328.912	364.22	444.16	374.986	293.447	382.859	379.42
evm.TU.scaffold0011.903	709.757	729.225	856.581	573.447	609.129	563.166	24.5349	20.2001	49.3491	44.1666	305.806	43.0936
evm.TU.scaffold0002.46	692.492	877.035	940.194	1105.48	1112.38	927.643	0.897831	0	0	0.294626	0	0
evm.TU.scaffold0010.663	321.727	360.654	305.854	406.302	422.182	526.167	759.529	983.593	706.191	814.504	564.673	891.804
evm.TU.scaffold0007.1389	253.884	225.956	263.761	324.103	234.976	258.752	1074.16	1173.94	823.302	1178.74	622.441	967.655
evm.TU.scaffold0010.339	477.947	467.46	506.282	415.94	545.183	509.042	419.576	328.829	326.683	402.666	831.017	514.159
evm.TU.scaffold0002.41	688.184	859.672	942.823	437.483	934.879	785.522	0	0	0	0.708078	0	0
evm.TU.scaffold0010.678	494.91	539.48	455.289	586.5	604.221	703.741	145.335	136.906	217.887	176.648	236.891	262.107
evm.TU.scaffold0008.1108	307.927	308.057	340.346	272.366	274.39	131.45	341.889	538.912	347.526	412.035	611.342	399.971
evm.TU.scaffold0010.504	306.301	272.007	295.946	263.848	281.094	126.274	374.02	638.235	363.193	461.232	645.649	459.893
evm.TU.scaffold0002.1709	279.015	274.886	265.313	261.181	198.037	157.431	452.919	397.875	490.695	408.879	292.285	440.15
evm.TU.scaffold0007.1961	129.051	149.235	126.276	227.435	174.151	116.477	1744.77	1639.45	1084.3	1223.71	322.482	945.259
evm.TU.scaffold0007.168	356.992	351.384	337.114	336.92	320.152	352.659	366.732	573.955	423.316	364.048	249.507	441.616
evm.TU.scaffold0010.566	501.257	464.894	470.261	493.52	359.457	218.962	463.338	538.524	546.608	439.948	402.484	520.651
evm.TU.scaffold0016.37	379.342	351.445	381.223	340.259	266.662	258.495	850.679	702.221	642.104	839.601	812.483	745.759
evm.TU.scaffold0005.651	333.078	368.343	352.816	354.26	206.48	146.556	531.496	559.338	634.406	655.02	367.504	681.661
evm.TU.scaffold0008.427	519.64	739.055	678.372	657.715	746.444	747.223	0	0	0	4.36582	0	3.20799
evm.TU.scaffold0001.670	517.569	501.077	503.635	538.004	552.949	545.615	327.829	339.773	395.353	376.793	407.117	401.012
evm.TU.scaffold0004.1193	442.874	461.473	433.1	358.414	487.952	560.873	379.065	509.287	566.736	420.716	499.816	484.042
evm.TU.scaffold0009.128	159.317	162.667	149.368	314.79	203.459	167.7	1251.63	1423.8	1092.81	1331.06	314.488	1092.18
evm.TU.scaffold0005.1205	294.18	340.142	328.844	400.66	315.505	315.362	497.146	731.218	533.98	671.764	393.248	606.148
evm.TU.scaffold0002.1470	454.564	522.955	469.975	488.32	489.58	424.702	585.489	561.351	580.717	638.089	536.264	560.554
evm.TU.scaffold0010.1394	253.1	266.346	282.708	234.844	204.776	154.774	810.366	572.105	714.111	780.131	429.638	690.567
evm.TU.scaffold0005.12	423.47	302.338	281.342	261.76	125.864	157.1	121.129	100.095	201.108	220.216	1265.87	200.106
evm.TU.scaffold0008.1054	444.214	516.714	517.032	459.923	410.298	439.657	450.996	369.974	458.871	448.891	311.034	440.675
evm.TU.scaffold0005.779	306.026	252.459	295.527	280.264	283.489	321.826	364.033	402.086	367.47	287.467	395.684	390.652
evm.TU.scaffold0010.664	376.478	360.868	386.007	417.156	378.625	389.431	497.33	587.244	600.64	684.214	485.83	695.462
evm.TU.scaffold0010.598	675.485	439.893	386.58	412.092	362.565	626.23	62.497	45.6187	119.547	98.9522	541.954	181.142
evm.TU.scaffold0006.631	286.899	344.234	275.272	323.063	288.79	353.914	393.198	401.09	325.515	414.948	325.701	419.074
evm.TU.scaffold0005.929	293.776	370.163	374.95	233.615	186.273	162.131	458.501	433.588	613.53	654.97	275.662	459.319
evm.TU.scaffold0005.224	378.981	350.993	353.477	373.963	355.432	377.248	482.041	609.902	514.198	470.161	321.38	513.767
evm.TU.scaffold0005.421	412.99	374.25	403.955	413.428	423.622	393.979	392.82	469.319	386.984	365.169	458.381	516.427
evm.TU.scaffold0003.931	445.961	494.549	458.255	429.846	371.357	363.754	497.959	390.119	529.544	518.055	588.641	510.854
evm.TU.scaffold0015.725	381.236	385.229	406.534	460.024	375.594	319.474	361.908	413.166	540.429	384.789	222.112	398.781
evm.TU.scaffold0010.1155	463.481	451.596	429.788	494.793	478.728	541.79	509.839	499.873	555.256	421.346	322.057	433.135
evm.TU.scaffold0010.602	533.11	570.723	670.163	453.82	475.862	385.454	0.597409	0.208127	1.83615	7.69463	0.335704	2.90995
evm.TU.scaffold0002.635	347.608	326.741	330.294	231.737	289.884	370.655	219.516	145.134	268.27	232.151	382.958	299.303
evm.TU.scaffold0006.883	236.222	293.665	276.164	206.983	243.064	250.081	378.758	433.701	398.878	406.114	340.957	382.525
evm.TU.scaffold0001.2090	537.377	480.107	513.098	470.029	628.83	639.879	262.754	315.759	283.209	250.068	316.202	280.009
evm.TU.scaffold0011.254	284.645	309.638	298.307	326.931	292.568	292.686	604.911	964.66	653.924	874.537	273.239	608.868
evm.TU.scaffold0002.212	186.173	185.461	186.253	196.934	220.942	196.572	843.015	845.394	759.978	949.588	469.413	1039.16
evm.TU.scaffold0008.981	190.809	238.282	230.524	173.322	159.127	178.553	586.464	441.108	469.613	590.786	355.192	557.382
evm.TU.scaffold0011.39	377.685	418.062	405.898	414.884	400.732	353.843	417.952	447.47	396.881	340.577	413.088	413.674
evm.TU.scaffold0008.764	458.79	472.803	447.185	422.768	417.84	355.671	481.144	439.087	435.139	481.142	532.206	495.547
evm.TU.scaffold0011.715	409.178	369.722	342.6	384.769	384.395	468.192	380.315	478.217	502.739	565.281	525.884	571.15
gene_1881	628.451	684.596	765.724	451.204	984.779	863.258	0	0	0	1.67168	0	0.142607
evm.TU.scaffold0014.302	269.759	233.374	276.132	369.735	367.755	293.229	1028.21	1028.89	657.215	955.768	386.77	614.921
evm.TU.scaffold0014.498	227.394	215.171	234.445	271.754	222.95	255.954	683.88	682.016	651.042	535.277	308.821	635.697
evm.TU.scaffold0006.1098	289.232	246.677	234.332	381.891	297.099	343.026	496.741	1234.45	770.6	902.577	503.319	652.914
evm.TU.scaffold0007.2056	318.279	300.721	307.907	284.782	308.21	299.353	358.511	385.961	366.124	301.956	409.579	356.975
evm.TU.scaffold0004.1551	295.099	303.664	329.046	328.5	254.22	233.474	669.763	1014.54	696.819	834.554	492.299	721.731
evm.TU.scaffold0011.342	214.4	256.69	264.646	189.282	157.67	167.024	400.646	359.207	384.123	383.205	314.151	351.94
evm.TU.scaffold0011.758	262.487	308.639	314.442	237.706	140.632	85.8087	646.12	585.281	656.005	759.903	265.289	516.518
evm.TU.scaffold0010.570	391.951	352.9	400.885	345.298	387.119	411.988	576.689	722.222	488.678	490.406	459.766	505.06
evm.TU.scaffold0013.394	413.645	410.973	401.224	399.525	408.257	395.034	401.122	480.362	425.257	546.825	396.585	452.539
evm.TU.scaffold0014.591	212.71	270.698	272.404	219.694	172.742	165.903	380.018	315.753	396.317	405.237	282.669	389.638
evm.TU.scaffold0007.229	313.757	328.521	268.215	700.747	494.753	737.083	272.119	361.48	388.254	411.408	427.042	500.434
evm.TU.scaffold0015.702	232.333	246.689	258.961	235.411	189.348	163.571	530.102	527.712	446.156	441.615	393.441	425.837
evm.TU.scaffold0007.2137	320.699	255.222	247.935	194.065	191.55	341.749	104.108	92.9345	204.963	192.757	903.761	160.192
evm.TU.scaffold0003.401	283.208	316.699	331.181	323.649	339.872	357.549	571.284	680.476	528.718	807.045	497.359	578.585
evm.TU.scaffold0004.1526	296.133	397.82	318.617	463.095	390.24	395.592	195.518	214.028	207.183	212.608	298.213	286.705
evm.TU.scaffold0006.677	298.506	352.536	343.827	291.602	279.252	370.146	326.574	188.168	254.138	246.588	266.179	257.718
evm.TU.scaffold0004.1194	293.907	328.974	328.404	328.862	313.03	271.94	457.38	490.456	419.094	534.281	473.946	570.903
novel.968	236.326	203.732	251.886	216.546	225.093	229.41	548.796	503.05	676.774	384.607	878.102	1083.65
evm.TU.scaffold0015.424	287.265	282.826	252.716	328.785	256.573	257.574	516.035	537.027	618.503	577.092	298.149	574.16
evm.TU.scaffold0008.932	228.854	276.544	252.492	522.706	325.319	229.746	652.978	1024.97	873.671	891.892	220.37	808.622
evm.TU.scaffold0001.522	718.953	792.114	834.099	731.042	895.087	915.686	38.0019	27.71	37.2617	42.8992	61.4932	57.0696
evm.TU.scaffold0008.438	579.441	760.627	833.895	713.295	497.437	440.236	0	0	0	1.53356	0	0
evm.TU.scaffold0002.1135	140.006	114.53	117.303	226.598	145.794	135.223	905.02	1491.45	868.434	1125.03	385.523	666.714
evm.TU.scaffold0014.513	370.513	503.759	440.823	406.839	261.185	222.265	33.1551	19.3817	37.9978	44.073	178.641	32.0917
evm.TU.scaffold0015.626	295.554	345.852	321.179	275.87	162.146	123.431	308.057	263.259	437.593	363.174	257.301	411.875
evm.TU.scaffold0002.1150	474.339	421.893	462.876	306.139	327.094	283.836	526.514	557.658	549.667	561.388	443.072	501.01
evm.TU.scaffold0008.653	405.665	387.181	415.081	330.263	396.339	419.668	454.823	513.854	508	414.078	454.451	447.611
evm.TU.scaffold0005.897	116.508	91.8455	130.649	91.0657	79.7616	96.0704	1611.91	766.189	855.085	1015.84	483.562	971.763
evm.TU.scaffold0007.1359	658.467	571.907	502.733	414.494	338.887	157.341	15.4294	7.33	1369.87	10.9607	10.8097	5.91939
evm.TU.scaffold0010.1326	336.14	360.32	357.256	308.496	319.913	249.55	443.224	502.387	452.642	430.932	474.412	465.063
evm.TU.scaffold0010.1284	734.499	800.438	858.917	501.766	506.942	316.622	133.256	126.713	116.824	140.781	171.715	180.852
evm.TU.scaffold0001.826	349.804	326.964	357.185	275.736	280.532	331.563	277.032	278.682	312.404	258.736	348.849	295.287
evm.TU.scaffold0015.395	347.809	358.61	394.798	371.581	332.303	315.72	405.077	376.616	381.319	466.806	391.02	464.745
evm.TU.scaffold0002.1217	67.7946	58.7561	67.1973	124.562	88.2808	62.7196	624.576	1534.62	1125.93	1269.06	290.809	1248.55
evm.TU.scaffold0001.1999	304.097	255.381	236.785	287.562	221.298	292.531	478.713	569.965	518.381	479.347	426.59	563.43
evm.TU.scaffold0006.51	140.919	143.841	142.638	130.286	147.844	176.158	775.872	1187.43	872.145	774.132	255.551	1022.94
evm.TU.scaffold0001.968	266.212	224.088	238.984	242.701	277.698	334.041	234.334	402.209	266.605	215.341	337.227	286.041
evm.TU.scaffold0014.589	265.257	265.109	258.351	281.28	258.935	250.543	445.276	312.29	349.203	336.1	423.039	441.444
evm.TU.scaffold0011.76	274.082	298.205	299.402	289.117	231.65	190.983	452.878	424.801	356.526	379.648	295.543	386.956
evm.TU.scaffold0008.439	561.025	728.612	739.97	767.038	490.097	381.528	0	0	0	1.91049	0	0
evm.TU.scaffold0011.103	451.688	417.899	392.592	425.788	485.563	522.083	413.157	382.496	400.074	382.196	385.752	420.98
evm.TU.scaffold0011.99	243.182	243.439	231.542	235.792	191.305	175.937	301.693	351.12	319.994	315.372	231.627	334.954
evm.TU.scaffold0006.993	469.144	483.835	461.934	466.807	367.744	298.307	311.684	290.109	350.054	370.096	377.182	347.561
evm.TU.scaffold0007.2098	270.214	254.064	234.325	306.222	261.782	266.868	684.985	843.334	597.6	690.496	437.566	641.566
evm.TU.scaffold0007.1560	188.686	203.855	211.797	192.557	186.806	172.709	302.284	318.144	301.668	271.954	228.388	308.263
evm.TU.scaffold0008.1442	667.907	546.83	486.702	838.748	882.455	1260.87	37.5248	38.0977	21.4742	32.15	148.097	71.8097
evm.TU.scaffold0007.1160	156.762	179.841	207.904	184.465	119.581	131.738	1002.9	773.476	652.581	832.477	252.175	639.681
evm.TU.scaffold0010.65	92.7689	87.5307	84.4993	143.091	117.705	115.567	1364.45	737.513	864.621	1130.97	330.79	848.177
evm.TU.scaffold0001.1651	311.29	280.652	323.805	251.805	199.59	210.674	416.268	447.648	407.464	404.352	318.54	423.443
evm.TU.scaffold0005.2110	193.924	365.859	388.957	149.607	57.6953	51.3204	403.07	325.075	674.324	271.426	420.365	558.356
evm.TU.scaffold0009.800	318.555	358.721	303.833	306.33	290.944	315.254	339.624	330.848	313.317	370.096	306.923	371.038
evm.TU.scaffold0005.1315	163.95	188.937	179.991	186.484	139.767	123.676	570.342	443.294	553.644	597.62	251.697	419.179
evm.TU.scaffold0004.1326	111.85	87.4664	100.688	137.96	90.0396	57.5638	914.191	691.586	1072.94	916.295	506.452	1315.69
evm.TU.scaffold0004.514	216.085	251.375	265.359	298.414	349.646	342.159	10.6429	3.17812	13.0455	11.7872	60.7824	20.8768
evm.TU.scaffold0002.42	543.863	679.891	723.174	644.943	392.534	184.533	0	0	0.25405	0	0.47775	0.249902
evm.TU.scaffold0001.2189	49.829	45.7196	43.0344	40.0833	43.4878	29.5854	80.1942	945.367	1341.1	2347.42	487.341	1077.93
evm.TU.scaffold0010.43	299.228	186.385	232.636	160.587	175.443	209.949	58.7607	42.6719	119.571	95.9471	562.147	117.619
evm.TU.scaffold0005.543	439.549	423.601	510.865	368.745	368.809	360.835	83.5758	52.8295	80.6843	92.7989	302.221	90.7861
evm.TU.scaffold0015.379	187.871	208.572	209.413	207.201	192.43	187.015	376.876	326.321	325.754	274.788	233.389	363.464
evm.TU.scaffold0005.66	330.452	343.867	335.405	313.013	370.468	286.233	300.92	515.479	326.881	374.191	239.1	327.781
evm.TU.scaffold0006.1338	228.738	229.874	216.053	240.789	229.022	203.17	336.577	223.84	254.878	228.973	480.838	292.956
evm.TU.scaffold0009.22	274.666	279.159	280.446	272.664	232.517	200.065	570.968	624.127	515.227	534.8	335.509	552.572
evm.TU.scaffold0013.19	377.684	407.818	421.033	403.48	357.766	312.155	116.525	156.198	196.117	172.76	172.986	254.69
evm.TU.scaffold0006.267	285.706	284.862	255.409	267.752	164.2	124.283	310.818	361.053	434.901	356.337	263.136	322.373
evm.TU.scaffold0010.44	339.575	401.157	448.284	259.761	275.062	135.963	27.0786	26.3055	62.0643	39.3031	204.334	32.7121
evm.TU.scaffold0010.1376	205.042	212.249	211.335	227.347	212.189	241.168	433.314	372.988	448.339	453.153	303.054	444.871
evm.TU.scaffold0002.221	873.738	650.677	550.855	448.939	370.85	524.223	0	0	0	13.417	0	0
evm.TU.scaffold0005.23	226.746	225.657	232.479	326.263	310.217	335.169	362.381	433.167	325.901	311.428	364.596	456.849
evm.TU.scaffold0009.427	261.607	216.706	259.18	204.749	212.03	215.114	385.962	402.747	340.501	338.65	438.786	465.832
evm.TU.scaffold0006.864	160.325	143.813	166.682	154.629	151.158	261.51	590.057	496.079	628.309	452.378	663.992	669.821
evm.TU.scaffold0011.1307	252.021	227.941	233.437	269.668	254.467	260.475	752.829	408.328	670.401	594.23	528.502	582.734
evm.TU.scaffold0001.362	306.152	342.306	310.38	287.669	271.219	310.923	200.858	229.688	299.461	271.887	218.272	246.466
evm.TU.scaffold0009.10	290.01	300.646	258.58	261.827	329.71	356.901	67.9228	57.9747	135.116	86.9274	209.198	128.346
evm.TU.scaffold0013.740	434.918	419.159	433.269	411.947	401.474	382.569	333.993	343.032	313.261	373.659	342.335	340.72
evm.TU.scaffold0001.942	248.262	320.572	325.918	276.647	315.699	277.341	0	0	0	2.16612	0	0.739146
evm.TU.scaffold0007.1807	224.121	315.727	313.135	236.725	134.905	79.598	442.324	345.44	379.102	415.245	239.016	414.587
evm.TU.scaffold0007.1421	148.398	132.912	147.265	151.035	151.151	153.771	517.142	283.789	337.927	307.707	694.896	615.605
evm.TU.scaffold0002.222	929.937	625.669	473.946	465.408	419.856	622.043	0	0	0	8.22172	0	0
evm.TU.scaffold0001.2077	243.444	228.347	237.018	215.937	284.871	286.227	451.31	586.721	528.654	625.664	421.072	485.434
evm.TU.scaffold0011.364	240.245	243.452	276.357	222.779	172.909	111.512	548.913	608.938	439.704	454.03	437.7	458.119
evm.TU.scaffold0004.434	178.058	201.721	195.693	181.141	122.354	110.381	468.219	315.291	521.546	484.806	258.171	435.669
novel.1005	632.09	641.964	497.729	559.234	486.928	347.644	43.1198	6.16428	14.9286	20.005	29.6972	46.2524
evm.TU.scaffold0005.966	485.985	415.005	461.63	420.397	349.025	266.753	274.677	270.631	225.713	207.313	272.593	304.784
evm.TU.scaffold0008.440	615.403	742.623	674.694	606.05	512.249	447.264	0	0	0	1.44408	0	0
evm.TU.scaffold0008.756	206.773	227.068	194.405	208.601	193.279	223.911	303.911	348.473	380.27	294.346	220.721	333.973
evm.TU.scaffold0004.1718	345.983	376.458	357.541	350.703	370.104	398.299	212.335	190.822	239.424	240.003	239.762	259.826
evm.TU.scaffold0004.1279	141.732	141.756	144.15	216.051	152.781	101.553	819.284	995.419	677.585	835.833	251.712	678.156
evm.TU.scaffold0005.1958	68.7136	54.0296	69.938	97.5869	63.3027	55.8685	1013.83	1058.1	782.707	966.061	249.979	925.482
evm.TU.scaffold0009.1080	207.15	185.684	234.471	189.06	200.362	209.755	601.746	834.753	548.666	673.563	309.022	564.265
evm.TU.scaffold0010.522	238.521	241.333	249.327	224.027	207.133	254.362	476.095	402.559	393.187	452.625	424.898	455.287
evm.TU.scaffold0004.1271	137.962	122.341	137.123	152.368	139.299	142.733	751.152	344.818	627.659	516.16	860.229	527.909
gene_6231	399.829	456.326	442.891	501.868	536.528	398.428	7.53705	15.7547	12.8696	14.615	60.9446	16.5724
evm.TU.scaffold0002.47	490.326	590.64	625.453	532.307	561.831	346.838	0	0	0	0.103357	0	0
evm.TU.scaffold0012.713	356.254	322.726	345.737	318.26	377.848	358.999	216.635	292.936	241.646	218.462	317.212	239.759
evm.TU.scaffold0009.860	198.423	215.23	207.37	220.875	196.569	214.408	307.047	292.37	352.958	321.656	236.137	334.396
evm.TU.scaffold0002.34	240.509	232.442	243.932	245.085	161.793	141.638	767.236	596.734	555.929	799.253	468.012	622.544
evm.TU.scaffold0008.1737	464.724	470.633	427.667	504.411	379.39	317.664	480.221	360.038	348.439	415.783	211.244	229.495
evm.TU.scaffold0001.2449	175.405	203.548	189.669	126.814	68.2041	47.1148	174.82	149.799	227.374	194.806	209.255	104.959
evm.TU.scaffold0014.510	159.011	173.399	184.764	117.647	99.6145	106.853	480.466	245.764	408.742	419.197	654.089	513.724
evm.TU.scaffold0008.819	330.882	265.762	309.208	328.212	411.613	522.728	266.157	367.538	338.874	192.085	269.088	244.904
evm.TU.scaffold0006.1034	148.716	108.872	90.8484	143.335	165.768	168.86	747.13	476.921	614.118	788.197	809.998	675.961
evm.TU.scaffold0005.40	223.765	262.324	238.494	240.375	219.052	236.646	322.369	306.219	322.216	308.266	245.992	331.709
evm.TU.scaffold0007.1497	137.604	127.57	136.019	158.713	128.299	102.33	860.509	576.535	678.094	720.933	396.677	701.285
evm.TU.scaffold0002.1839	176.028	186.415	181.17	186.623	217.069	267.391	333.857	309.186	291.497	330.861	274.746	373.225
evm.TU.scaffold0002.1146	390.822	353.36	372.443	288.375	255.079	180.857	258.424	208.164	191.588	163.497	282.113	247.315
evm.TU.scaffold0002.1928	228.846	242.989	237.138	230.325	166.991	124.325	296.676	256.987	296.621	290.621	198.712	294.734
evm.TU.scaffold0011.372	234.72	239.725	257.532	211.95	203.664	169.86	391.482	552.598	436.525	486.788	322.386	386.715
evm.TU.scaffold0007.430	224.301	245.282	226.201	235.756	200.801	202.019	392.063	421.908	386.901	422.617	211.227	374.729
evm.TU.scaffold0002.1959	52.7291	39.4327	40.1766	58.1568	49.9765	42.1346	1081.29	1210.9	798.225	1022.77	244.515	704.168
evm.TU.scaffold0002.1618	264.23	216.536	241.668	182.388	181.479	158.324	565.633	415.149	417.145	490.699	436.771	567.848
evm.TU.scaffold0003.680	361.876	367.424	353.597	360.648	418.681	429.46	334.964	403.593	322.265	355.044	263.529	324.096
evm.TU.scaffold0013.48	194.89	267.212	250.734	229.621	142.447	94.3971	369.412	290.572	325.294	266.474	303.171	354.5
evm.TU.scaffold0007.2213	272.493	249.82	259.825	295.169	250.424	263.843	308.847	360.79	419.043	355.126	214.701	367.451
evm.TU.scaffold0008.474	316.274	481	416.723	382.561	503.514	385.352	0.174356	0.182227	0.476343	1.20152	0.447891	1.87426
evm.TU.scaffold0007.788	277.483	268.845	248.866	288.207	289.154	328.92	381.134	383.307	625.32	707.512	234.259	337.709
evm.TU.scaffold0005.1357	206.683	201.84	208.802	265.238	218.884	172.761	527.584	668.1	479.375	512.462	258.325	519.91
evm.TU.scaffold0007.1159	217.373	242.544	245.645	193.411	186.651	214.211	389.316	264.351	305.495	339.325	363.887	370.271
evm.TU.scaffold0006.1293	152.612	129.386	142.807	171.849	140.394	158.535	600.344	424.253	501.423	536.023	309.38	580.972
evm.TU.scaffold0014.214	143.021	140.623	132.163	158.151	132.122	123.623	663.425	767.033	575.829	566.078	311.461	583.337
novel.943	122.327	89.2461	76.3236	125.879	143.424	149.741	740.757	512.807	565.675	694.636	730.063	698.314
evm.TU.scaffold0009.310	247.948	260.55	280.438	283.497	300.782	247.421	315.722	441.872	499.181	331.608	167.856	348.272
evm.TU.scaffold0004.1025	282.477	243.421	279.656	249.341	246.691	220.385	471.677	556.765	368.627	393.696	252.205	451.481
evm.TU.scaffold0010.361	310.087	340.453	342.408	332.83	225.169	196.154	419.743	378.782	327.524	422.728	337.999	383.438
evm.TU.scaffold0005.882	236.588	237.029	242.56	229.236	257.173	236.998	265.482	264.363	329.431	253.022	261.975	251.772
evm.TU.scaffold0002.1680	356.814	401.087	340.646	326.164	316.717	313.041	333.092	291.414	326.467	426.398	400.694	323.715
evm.TU.scaffold0010.619	502.372	575.03	715.339	545.258	595.954	368.505	0.212548	0.388752	0.217757	1.72627	0.20475	0.428403
evm.TU.scaffold0012.78	394.849	401.608	350.918	509.923	475.139	570.99	218.086	315.396	211.034	221.925	175.77	136.131
evm.TU.scaffold0012.220	455.075	388.791	354.309	439.729	420.426	445.396	405.345	335.732	233.511	273.398	107.537	291.166
evm.TU.scaffold0009.607	170.606	208.227	191.868	188.271	202.323	180.457	331.914	378.77	402.051	436.906	286.069	450.802
evm.TU.scaffold0002.1749	231.713	352.905	258.009	445.643	323.242	310.322	252.149	231.112	241.034	269.202	305.723	327.494
evm.TU.scaffold0015.507	127.056	283.046	204.581	379.646	127.999	165.512	666.95	190.869	291.002	273.891	460.77	209.55
evm.TU.scaffold0010.68	269.591	275.677	249.545	262.539	301.164	342.18	283.012	390.715	369.26	293.187	178.509	313.033
evm.TU.scaffold0005.1028	204.137	217.214	235.415	291.394	203.015	213.2	296.606	140.825	375.231	257.82	427.855	300.226
evm.TU.scaffold0001.1421	327.829	346.047	372.282	303.014	211.764	155.717	249.225	200.087	224.181	244.21	245.064	248.828
evm.TU.scaffold0010.915	359.619	323.927	330.127	314.491	362.88	305.795	229.154	202.741	546.423	205.932	321.206	203.598
evm.TU.scaffold0008.330	251.691	277.814	242.646	259.509	200.209	200.153	151.883	158.74	305.218	207.66	164.486	222.657
novel.765	266.799	266.982	259.498	248.16	264.608	329.092	37.321	31.6443	50.6219	50.6094	318.503	45.6634
evm.TU.scaffold0007.2274	172.256	362.096	233.679	238.787	237.802	205.251	439.646	198.119	366.208	295.157	346.458	691.302
evm.TU.scaffold0001.938	170.514	188.742	188.299	214.899	180.775	177.568	324.926	313.62	319	324.113	314.353	369.09
evm.TU.scaffold0001.57	337.062	343.788	410.204	266.769	344.263	295.996	133.727	140.465	108.074	113.273	108.903	173.163
evm.TU.scaffold0008.477	298.316	313.232	294.276	242.158	221.129	194.691	63.9557	44.1462	109.904	61.8424	406.841	84.9639
evm.TU.scaffold0001.1870	157.057	172.082	180.514	162.846	143.445	226.498	298.906	233.756	304.898	231.205	244.548	334.818
evm.TU.scaffold0005.491	379.754	404.786	415.708	334.685	304.784	239.36	212.477	205.753	224.134	205.159	240.049	209.461
evm.TU.scaffold0002.253	248.785	243.026	235.95	232.512	261.93	282.448	518.479	471.827	480.465	551.513	412.859	503.761
evm.TU.scaffold0007.2179	171.601	160.291	156.509	209.829	144.112	88.5632	810.956	830.781	600.036	608.133	220.457	658.217
evm.TU.scaffold0007.1582	221.806	221.421	244.33	177.557	137.367	100.586	382.59	269.109	348.421	290.641	432.418	337.021
evm.TU.scaffold0007.603	145.667	320.379	212.102	203.549	183.319	393.412	687.696	103.518	339.929	203.847	365.382	220.732
evm.TU.scaffold0005.1046	257.408	257.746	235.045	278.475	335.692	246.545	239.894	310.111	251.747	274.614	244.287	292.873
evm.TU.scaffold0001.2047	180.982	209.702	186.196	186.589	105.074	75.3868	514.855	413.987	396.533	495.486	407.526	432.613
evm.TU.scaffold0009.682	260.415	276.246	225.264	333.745	321.971	374.873	285.379	325.745	260.584	246.345	276.991	303.986
evm.TU.scaffold0002.2012	248.238	264.959	281.227	244.429	179.314	139.5	437.37	431.279	437.581	394.455	456.795	446.207
evm.TU.scaffold0004.227	259.126	273.076	266.985	272.696	270.756	264.906	277.398	377.867	279.709	298.72	331.877	307.879
evm.TU.scaffold0007.1284	113.264	139.842	140.341	112.632	104.078	79.7913	458.274	637.192	513.175	407.225	309.478	761.374
evm.TU.scaffold0007.734	356.995	340.232	334.449	391.418	451.166	507.94	196.773	264.57	244.838	253.649	260.951	265.191
evm.TU.scaffold0004.329	498.726	662.533	659.963	563.299	459.492	420.899	0.257793	0	0	1.26893	0	0
evm.TU.scaffold0002.1736	211.601	203.421	208.144	168.643	156.695	149.911	280.622	250.961	244.119	248.039	236.378	318.587
evm.TU.scaffold0001.1422	187.159	198.019	197.6	192.964	167.122	135.864	274.057	189.791	230.672	200.787	210.945	253.482
evm.TU.scaffold0008.1774	237.63	239.643	236.346	305.037	275.131	247.44	427.33	469.348	362.178	441.301	332.27	408.676
evm.TU.scaffold0003.183	178.337	229.116	200.912	538.591	352.45	324.857	347.204	601.796	470.919	415.897	110.104	611.943
evm.TU.scaffold0001.1321	192.885	207.15	192.594	194.046	180.582	141.301	360.009	167.347	277.254	287.608	332.977	369.215
evm.TU.scaffold0013.811	226.286	227.64	228.04	199.091	231.87	298.716	284.513	432.175	281.42	310.145	397.186	334.538
evm.TU.scaffold0005.1661	185.257	174.736	179.065	188.212	146.591	150.43	280.421	328.88	312.257	335.689	188.047	299.441
evm.TU.scaffold0007.144	261.11	320.14	304.271	201.937	175.121	182.718	423.038	82.4462	308.746	303.021	576.884	454.388
evm.TU.scaffold0007.2121	188.54	174.972	168.352	178.909	169.056	162.62	318.571	303.341	271.982	304.071	218.606	327.739
evm.TU.scaffold0010.654	62.0482	70.5073	54.268	113.871	72.0779	67.7622	832.369	924.607	936.528	692.076	160.022	708.921
evm.TU.scaffold0007.478	220.004	201.5	212.183	226.037	251.463	221.069	361.916	527.837	365.45	400.362	263.036	360.076
evm.TU.scaffold0005.20	413.691	566.384	528.983	510.077	413.174	310.241	1.27516	1.61168	0.531681	4.32073	0.842729	2.43569
evm.TU.scaffold0010.368	303.146	291.042	284.86	281.156	249.979	239.123	316.255	320.673	501.438	238.909	175.486	289.734
evm.TU.scaffold0015.91	146.758	166.644	189.435	135.199	118.624	127.105	304.664	233.653	241.916	294.92	219.971	283.509
evm.TU.scaffold0002.1469	299.112	302.349	317.901	290.569	287.275	327.716	334.866	266.457	321.584	361.346	373.79	308.316
evm.TU.scaffold0005.2067	167.693	188.742	177.835	138.064	171.655	176.296	652.236	123.969	405.774	396.421	732.949	587.408
evm.TU.scaffold0010.609	449.098	527.128	580.97	454.1	431.578	394.023	4.43385	8.43	8.40849	8.82276	39.713	6.70253
evm.TU.scaffold0009.1443	291.557	317.744	281.559	400.652	309.11	253.02	283.386	292.813	272.332	342.703	276.093	304.367
evm.TU.scaffold0002.2029	138.179	178.334	161.859	116.339	91.2758	99.5272	261.727	165.543	279.534	258.46	176.618	265.95
evm.TU.scaffold0006.294	320.485	295.257	325.985	299.318	354.344	376.228	218.925	336.404	225.59	199.482	210.042	230.813
evm.TU.scaffold0008.37	311.343	317.765	301.359	298.965	387.584	346.419	247.149	317.729	270.503	326.213	254.248	228.162
evm.TU.scaffold0005.9	335.783	449.549	372.509	451.013	472.295	389.431	0	0.960446	1.56913	1.73396	5.09015	1.92939
evm.TU.scaffold0008.1738	300.171	323.145	307.495	312.889	244.698	194.627	496.825	288.18	285.567	395.869	203.785	248.701
evm.TU.scaffold0011.906	257.949	276.499	265.433	277.784	289.204	288.83	264.309	224.409	252.182	258.335	262.692	289.666
evm.TU.scaffold0007.302	217.4	199.373	206.606	229.205	223.721	196.583	487.417	481.138	401.67	584.426	289.315	483.52
evm.TU.scaffold0007.2119	350.136	338.865	273.499	377.402	402.738	308.826	301.466	320.158	480.475	376.92	198.842	310.608
evm.TU.scaffold0003.853	99.8087	119.654	133.792	101.192	117.194	105.421	186.599	191.244	203.398	216.808	152.233	159.625
evm.TU.scaffold0001.1444	23.9473	23.8971	18.8576	14.4309	28.2018	34.1434	369.96	608.832	409.02	1146.96	536.328	562.521
evm.TU.scaffold0010.524	186.525	202.499	205.092	172.384	140.289	81.7966	398.615	397.823	376.417	339.528	249.226	416.711
evm.TU.scaffold0008.1019	166.097	181.409	185.418	168.441	190.665	203.702	242.687	252.737	217.625	238.702	172.334	230.909
evm.TU.scaffold0012.535	232.037	258.815	240.224	260.305	248.086	267.217	245.671	377.006	380.536	353.458	191.834	300.25
evm.TU.scaffold0013.7	112.16	106.765	124.416	98.2434	56.9529	35.3056	208.105	182.685	196.73	147.575	149.016	174.224
evm.TU.scaffold0004.105	213.533	200.105	201.213	261.391	246.37	298.568	260.717	501.447	418.954	505.9	201.377	369.736
evm.TU.scaffold0004.1623	214.998	219.35	200.405	217.294	230.983	277.456	190.114	243.241	198.052	184.296	230.501	226.042
evm.TU.scaffold0014.529	250.732	215.239	269.958	265.373	252.417	239.039	294.201	295.266	262.578	247.78	285.456	255.257
evm.TU.scaffold0012.68	124.725	143.288	148.536	157.753	127.873	109.904	434.285	516.953	410.644	477.65	213.437	496.199
evm.TU.scaffold0013.466	213.401	248.275	197.539	231.927	170.409	177.002	175.817	125.964	177.926	225.143	201.431	273.217
evm.TU.scaffold0008.174	57.7261	28.7963	26.9542	39.1211	37.7019	22.5696	524.866	787.55	395.902	651.724	807.339	970.089
evm.TU.scaffold0007.868	112.477	90.8883	100.661	174.67	145.058	131.172	555.754	641.661	515.822	668.045	350.196	611.315
evm.TU.scaffold0005.400	254.336	251.099	225.218	252.743	269.63	406.078	295.496	279.315	268.765	369.978	300.746	330.719
evm.TU.scaffold0010.1117	237.882	205.568	252.187	236.899	240.18	244.438	293.056	512.842	398.142	394.03	238.011	295.894
evm.TU.scaffold0014.518	263.152	276.924	291.805	260.22	222.269	210.302	298.786	225.136	299.841	259.126	294.952	300.251
evm.TU.scaffold0002.2075	149.127	149.665	156.047	161.56	149.755	158.689	362.12	313.51	323.544	260.222	162.512	291.418
evm.TU.scaffold0007.2386	263.347	231.352	188.99	211.661	181.119	164.11	209.972	187.659	269.657	292.996	500.769	309.42
evm.TU.scaffold0004.1424	164.678	207.678	217.433	166.923	69.7407	50.0485	386.401	259.388	410.628	402.756	212.396	379.359
evm.TU.scaffold0015.595	238.862	233.464	240.663	247.329	269.606	271.151	253.086	290.879	232.475	262.965	302.672	256.143
evm.TU.scaffold0010.614	392.014	468.022	493.975	422.294	438.982	401.105	0.0598554	0	0	1.29635	0	0.301606
evm.TU.scaffold0007.207	294.613	319.214	228.157	340.195	391.046	335.163	296.051	226.1	204.345	278.318	581.374	304.348
evm.TU.scaffold0008.1011	465.748	364.527	327.653	301.523	346.123	260.539	104.444	123.352	643.411	83.8721	36.4	70.151
evm.TU.scaffold0002.229	358.155	354.074	566.146	268.497	261.516	266.612	0	0	0	1.34123	0	0
evm.TU.scaffold0008.373	62.2347	71.3466	66.6466	89.1827	58.2104	53.3121	643.695	895.425	590.03	553.335	199.262	592.892
evm.TU.scaffold0004.1337	101.597	112.389	109.106	128.016	95.9972	98.0201	446.35	670.254	473.653	393.964	271.264	412.779
evm.TU.scaffold0007.686	116.757	145.619	146.321	142.015	125.099	102.908	357.175	412.725	308.817	341.273	193.42	323.959
evm.TU.scaffold0006.724	45.3266	44.7655	39.1669	84.6443	58.5474	74.5679	559.16	471.633	544.881	749.398	259.854	819.933
evm.TU.scaffold0008.1550	70.4147	64.8233	88.9248	106.584	92.3438	82.5916	722.058	551.746	541.429	496.118	388.588	429.532
evm.TU.scaffold0009.1169	212.983	224.625	221.089	229.81	179.404	166.318	220.509	206.623	191.684	215.948	198.879	235.228
evm.TU.scaffold0010.512	499.843	437.149	672.736	366.996	365.963	363.644	1.58521	6.33719	2.07068	4.17454	7.06263	2.7957
evm.TU.scaffold0006.564	192.188	207.87	222.35	202.762	177.453	172.941	352.894	274.373	340.496	329.694	187.692	313.111
evm.TU.scaffold0005.1703	217.208	228.803	216.065	300.675	272.525	281.589	266.599	493.669	311.211	371.318	196.819	341.939
evm.TU.scaffold0005.1189	107.802	107.556	147.055	142.62	101.127	87.1214	438.387	319.9	690.789	294.678	636.337	292.135
evm.TU.scaffold0010.883	147.982	151.534	174.556	134.827	112.227	118.905	207.121	280.202	134.409	133.785	224.766	152.529
evm.TU.scaffold0007.1152	168.57	175.375	187.482	166.512	109.787	84.876	283.945	231.307	267.112	232.597	238.278	294.842
evm.TU.scaffold0001.204	200.611	235.204	209.028	252.355	235.073	261.844	334.169	419.709	325.012	370.491	316.832	339.989
evm.TU.scaffold0013.477	218.718	241.757	266.919	219.603	265.038	262.711	201.684	215.325	208.744	170.171	246.141	218.664
evm.TU.scaffold0005.207	111.911	115.595	104.014	119.823	86.4634	67.669	606.511	531.547	491.432	581.442	288.626	573.607
evm.TU.scaffold0004.35	126.452	116.49	124.373	243.439	198.39	198.325	514.119	814.604	460.031	538.615	166.904	487.374
evm.TU.scaffold0007.2513	241.4	219.598	231.44	208.687	223.593	236.704	304.303	367.689	332.503	257.139	280.64	284.687
evm.TU.scaffold0010.1345	213.128	198.504	201.728	227.138	244.345	286.999	216.179	197.978	189.418	198.24	189.61	227.972
evm.TU.scaffold0013.303	159.755	181.363	162.326	177.435	151.825	158.398	316.057	256.082	305.454	286.402	161.655	259.212
evm.TU.scaffold0014.565	156.868	166.136	168.142	148.707	147.186	138.421	355.967	279.873	301.216	295.428	250.453	355.481
gene_4935	138.88	208.142	158.991	202.451	142.838	171.4	231.806	232.76	256.911	249.107	155.605	255.264
evm.TU.scaffold0007.1150	124.222	118.48	112.607	138.131	135.644	119.073	658.567	669.072	465.139	437.44	261.483	609.326
evm.TU.scaffold0015.753	237.927	263.038	280.215	216.649	178.855	96.4238	293.847	235.584	284.535	232.401	241.025	277.766
evm.TU.scaffold0009.471	256.495	262.778	255.735	238.815	302.701	339.281	152.623	164.906	177.384	180.136	235.562	179.325
evm.TU.scaffold0010.787	177.655	166.389	190.265	136.807	162.186	134.934	533.859	562.554	412.021	332.641	129.642	363.985
evm.TU.scaffold0006.582	154.014	184.407	175.266	195.987	191.895	179.365	241.84	240.133	196.579	176.31	176.59	176.113
evm.TU.scaffold0007.2270	267.946	244.697	234.349	207.969	227.203	213.94	307.278	449.675	186.108	388.748	644.372	332.696
evm.TU.scaffold0007.2136	242.217	233.017	255.632	186.499	95.4571	62.3077	54.0687	49.5799	112.776	83.5309	509.843	67.2018
evm.TU.scaffold0001.989	319.218	340.009	275.814	383.447	422.553	417.922	80.2176	95.6417	129.48	95.3296	112.559	135.562
evm.TU.scaffold0006.1373	187.87	203.185	197.415	192.099	177.296	195.837	383.942	439.227	349.661	345.414	269.529	360.689
evm.TU.scaffold0008.853	198.476	189.129	167.625	166.594	175.338	174.47	345.787	397.477	203.745	423.225	555.32	295.76
evm.TU.scaffold0014.594	213.583	215.66	203.202	194.229	182.724	170.178	314.49	248.551	267.596	293.886	350.294	292.297
evm.TU.scaffold0006.338	256.484	206.354	216.832	202.278	275.831	336.187	182.61	265.659	208.497	176.898	242.046	205.858
evm.TU.scaffold0007.2555	183.785	205.516	222.386	163.515	122.922	137.776	277.191	278.147	240.549	255.19	192.886	249.625
evm.TU.scaffold0009.815	197.306	221.253	201.322	198.548	219.963	223.764	211.946	200.796	213.2	241.955	178.043	229.001
evm.TU.scaffold0002.2117	174.588	177.57	205.26	179.15	147.525	104.266	250.264	278.441	260.562	259.244	196.104	279.336
evm.TU.scaffold0015.651	97.3982	105.761	119.156	112.827	79.1868	80.511	242.405	226.137	207.266	235.049	210.186	252.951
evm.TU.scaffold0005.1295	216.572	231.32	232.197	238.375	217.182	181.984	339.093	318.731	284.979	306.988	260.528	319.878
evm.TU.scaffold0013.510	171.347	194.32	181.66	192.806	212.708	189.035	247.718	180.762	199.153	194.559	225.536	226.462
evm.TU.scaffold0002.1342	255.47	281.465	234.313	306.662	295.381	328.562	231	255.367	258.782	292.116	263.36	304.956
evm.TU.scaffold0007.2049	105.71	72.2619	83.0015	118.571	118.372	90.957	497.712	567.412	526.288	602.791	217.275	651.207
evm.TU.scaffold0002.230	389.687	356.764	563.59	365.166	401.142	311.447	0	0	0	1.19221	0	0
evm.TU.scaffold0001.1330	135.178	147.725	132.502	148.872	146.238	165.894	263.566	253.943	307.977	257.606	253.099	277.186
evm.TU.scaffold0016.38	229.783	230.219	255.015	207.37	177.433	168.506	393.111	359.486	224.994	282.436	412.093	292.683
evm.TU.scaffold0008.89	8.92413	529.366	561.148	9.45584	149.796	6.48734	5.30692	630.397	491.877	9.14278	15.3367	8.02232
evm.TU.scaffold0005.831	216.585	204.083	216.463	228.056	256.201	224.855	177.748	265.525	189.368	188.817	160.549	205.891
evm.TU.scaffold0009.1283	272.179	261.195	254.477	266.846	245.388	225.62	243.727	304.161	270.804	372.968	300.507	322.682
evm.TU.scaffold0003.769	199.875	206.444	154.329	260.952	212.729	222.319	304.359	203.588	327.89	310.853	400.687	385.609
evm.TU.scaffold0015.620	181.468	183.051	185.312	219.25	256.32	283.099	279.231	319.105	264.176	294.489	230.632	248.67
evm.TU.scaffold0006.1159	177.019	214.092	222.153	191.852	142.255	124.485	240.192	182.325	233.408	281.53	182.889	254.088
evm.TU.scaffold0001.1961	240.486	236.47	234.699	231.756	266.879	303.172	181.613	278.543	221.489	227.92	197.053	216.012
evm.TU.scaffold0007.1732	140.709	145.628	152.07	131.238	102.263	95.0119	286.51	227.906	246.433	225.285	177.337	244.562
evm.TU.scaffold0014.715	185.364	175.271	181.747	167.998	174.858	181.773	330.794	349.659	354.424	329.244	177.303	336.988
evm.TU.scaffold0010.1289	233.426	218.261	236.795	208.434	229.812	247.72	242.429	297.647	267.111	231.166	237.077	251.857
evm.TU.scaffold0002.457	438.989	443.52	355.408	420.549	441.383	433.598	118.851	154.348	129.337	195.599	245.913	102.393
evm.TU.scaffold0002.1887	144.782	107.393	125.496	94.3442	103.883	85.1402	731.056	585.5	420.99	585.263	278.452	358.207
evm.TU.scaffold0003.177	270.876	224.757	240.09	198.069	185.966	163.101	209.864	203.048	789.015	219.719	125.913	184.819
evm.TU.scaffold0011.173	155.615	176.2	182.415	248.212	162.701	119.461	296.743	230.847	317.64	296.705	223.267	413.618
evm.TU.scaffold0009.353	282.799	289.61	288.057	304.603	286.664	243.234	160.148	150.513	344.722	183.763	191.076	184.293
evm.TU.scaffold0011.505	280.55	298.819	301.133	174.129	165.203	99.257	243.013	208.63	248.762	338.885	389.255	175.135
evm.TU.scaffold0002.734	212.412	210.399	187.651	255.713	244.463	288.507	325.527	205.562	324.091	249.665	319.671	372.758
evm.TU.scaffold0004.357	273.668	253.063	261.256	247.539	286.817	262.762	183.313	200.546	189.256	181.071	221.294	193.046
evm.TU.scaffold0007.1271	202.906	227.325	221.75	215.009	193.284	188.434	240.784	195.75	242.253	256.789	207.248	286.338
evm.TU.scaffold0009.984	154.386	150.322	144.828	139.812	86.3408	68.2181	184.693	222.025	211.657	190.207	270.744	260.925
evm.TU.scaffold0010.288	177.866	140.57	149.674	198.237	193.995	166.744	458.374	639.321	468.918	492.911	163	408.783
evm.TU.scaffold0005.390	44.5074	52.5311	39.8396	84.8125	98.4162	107.943	482.639	578.268	572.541	372.764	451.321	735.511
evm.TU.scaffold0007.2170	174.883	194.005	199.598	222.062	204.94	181.769	308.952	297.781	348.782	352.572	204.963	356.184
evm.TU.scaffold0002.349	180.308	179.134	180.674	163.089	162.708	161.866	141.553	152.745	169.615	128.787	232.65	173.267
evm.TU.scaffold0010.537	84.6118	70.9684	57.5887	85.1169	50.4415	24.5323	667.579	957.505	781.025	542.156	110.098	470.178
evm.TU.scaffold0007.675	109.541	122.95	110.302	129.976	123.538	132.451	407.053	213.65	340.16	392.117	399.683	364.251
evm.TU.scaffold0007.455	307.367	382.274	268.503	429.438	286.825	272.265	165.235	108.232	150.584	157.066	198.989	184.687
evm.TU.scaffold0003.989	301.425	377.536	388.341	287.558	381.746	324.814	46.0656	50.8143	52.5809	51.8071	44.1827	54.5987
evm.TU.scaffold0007.2005	239.697	250.177	271.981	252.816	262.757	208.128	174.57	206.118	134.3	207.722	152.841	195.221
evm.TU.scaffold0008.472	306.742	483.981	595.622	287.178	398.316	422.984	0	0	0	0.207131	0.0506705	0
evm.TU.scaffold0005.539	207.675	177.802	188.074	196.015	126.528	116.954	408.848	220.112	459.387	358.205	465.761	298.933
evm.TU.scaffold0010.1251	216.604	204.142	217.453	180.044	193.456	168.555	241.902	198.05	245.149	186.409	267.28	218.12
evm.TU.scaffold0008.444	419.95	495.142	546.685	378.628	279.341	186.188	0	0	0	1.70883	0	0
evm.TU.scaffold0002.1763	159.066	158.764	192.311	157.973	76.2059	43.3811	282.213	186.709	250.154	211.325	268.655	267.791
evm.TU.scaffold0007.1227	122.096	134.875	147.606	113.089	78.2458	49.5601	426.831	301.717	303.528	405.888	204.308	396.015
evm.TU.scaffold0009.1174	232.852	222.999	261.575	101.063	210.176	162.557	247.877	277.808	251.509	218.016	210.67	214.243
evm.TU.scaffold0006.1252	141.683	177.011	156.707	165.265	116.93	171.114	205.079	158.078	283.536	231.556	186.564	244.412
evm.TU.scaffold0013.273	130.172	195.341	130.156	312.116	241.594	344.021	173.793	194.809	182.695	183.497	170.097	207.474
evm.TU.scaffold0012.36	109.319	112.096	111.12	114.055	93.0337	113.673	294.545	307.673	293.761	279.714	174.789	293.884
evm.TU.scaffold0009.1518	144.023	142.849	155.307	149.823	128.883	113.013	339.603	171.609	327.122	288.947	455.914	387.569
evm.TU.scaffold0008.429	274.61	287.62	343.575	303.637	369.425	360.638	0	0.0635809	0	1.73678	0.0586026	1.83923
evm.TU.scaffold0007.1587	29.9273	10.9175	258.276	69.5473	50.4834	115.571	184.371	193.43	32.9234	340.611	192.069	327.405
evm.TU.scaffold0015.674	195.498	204.569	203.579	209.239	204.493	180.064	227.156	182.029	193.219	211.449	259.94	235.388
evm.TU.scaffold0002.1758	206.955	240.654	226.403	215.844	207.121	197.434	108.508	98.5816	113.999	94.9125	114.584	119.626
evm.TU.scaffold0002.76	171.494	172.354	191.874	165.673	147.826	101.433	201.556	231.791	178.873	168.237	188.305	186.608
evm.TU.scaffold0010.49	214.227	228.141	217.583	238.381	260.26	254.791	289.794	324.538	267.051	282.589	222.813	276.811
evm.TU.scaffold0010.1385	161.106	142.123	141.111	158.288	127.164	125.588	378.314	477.482	417.882	498.814	268.675	399.851
evm.TU.scaffold0012.306	123.176	138.718	157.207	100.043	130.424	167.361	298.876	138.363	383.597	312.643	174.867	267.94
evm.TU.scaffold0006.298	160.466	175.713	162.075	184.635	162.541	173.624	267.81	356.28	242.094	212.814	219.203	302.087
evm.TU.scaffold0010.1273	103.795	92.5825	103.518	179.834	112.479	87.6682	424.396	682.805	376.23	612.672	239.03	466.52
evm.TU.scaffold0008.488	295.475	325.12	344.422	293.418	339.376	271.115	92.2307	91.3175	86.6496	103.39	186.246	109.784
evm.TU.scaffold0006.477	181.299	170.927	192.121	154.167	135.223	109.126	280.885	375.411	293.023	291.278	205.786	347.875
evm.TU.scaffold0009.167	182.264	133.643	157.745	87.5158	152.866	172.245	223.384	298.067	216.892	188.051	245.193	180.735
evm.TU.scaffold0003.1330	432.359	263.016	402.046	158.515	214.28	140.282	211.573	177.513	197.326	145.477	207.299	167.256
evm.TU.scaffold0015.438	107.752	118.38	120.889	112.121	93.8204	82.2305	137.05	116.52	135.68	125.016	149.009	154.814
evm.TU.scaffold0012.883	164.924	294.634	170.763	245.778	323.347	328.532	149.122	172.653	168.285	136.453	168.149	146.066
evm.TU.scaffold0008.23	220.281	217.755	176.351	317.541	338.668	383.799	167.013	239.52	162.695	167.65	222.178	178.063
evm.TU.scaffold0005.1080	118.886	149.253	125.557	112.013	71.1157	72.0128	326.822	260.65	278.466	345.703	407.962	375.798
evm.TU.scaffold0002.2116	176.901	198.835	195.165	179.066	163.552	176.798	301.381	210.255	250.508	276.961	239.068	301.375
evm.TU.scaffold0006.523	53.3126	34.1364	68.8704	53.2385	61.2505	67.7983	636.442	310.454	521.481	219.681	446.528	449.955
evm.TU.scaffold0003.387	298.393	255.873	264.919	245.709	270.098	249.804	85.5304	90.4162	94.9408	85.5792	113.812	92.6853
evm.TU.scaffold0005.1477	167.498	203.73	160.333	180.21	226.481	237.03	321.448	281.648	216.163	275.482	497.172	265.548
evm.TU.scaffold0009.1477	54.7891	117.362	123.597	112.799	94.5791	76.2152	159.517	180.603	149.817	153.899	112.203	196.851
evm.TU.scaffold0005.1328	104.073	118.121	127.526	116.502	110.216	102.602	340.409	382.319	318.248	371.958	219.945	356.942
evm.TU.scaffold0013.873	75.03	74.7014	77.0604	79.6377	83.4115	94.1294	514.575	684.493	432.419	682.632	215.396	435.947
evm.TU.scaffold0002.340	242.698	231.352	221.318	208.84	201.094	261.355	48.0616	40.0734	82.4921	76.8973	366.007	52.2996
evm.TU.scaffold0002.255	155.992	160.404	157.957	155.047	135.996	127.764	234.334	309.757	283.214	277.563	159.091	254.45
evm.TU.scaffold0004.270	460.36	374.757	356.314	345.017	460.552	260.163	5.14108	0.46221	505.979	17.306	43.2942	61.5045
evm.TU.scaffold0011.415	193.907	191.478	207.117	196.125	205.47	191.186	57.1136	45.2959	131.827	71.2747	137.708	77.1955
evm.TU.scaffold0014.703	159.472	144.95	142.877	143.377	175.546	178.674	398.916	344.754	387.192	447.582	246.876	325.232
evm.TU.scaffold0015.285	310.994	312.928	357	317.849	367.164	338.927	117.322	138.007	130.359	122.822	175.125	179.148
evm.TU.scaffold0004.324	372.506	500.196	458.345	350.328	326.979	385.853	0	0	0	1.03357	0	0
evm.TU.scaffold0004.1344	161.393	176.112	173.323	177.856	175.388	175.944	154.191	167.715	157.213	151.977	188.381	190.191
evm.TU.scaffold0013.241	238.15	189.601	147.663	184.473	178.634	100.359	283.871	270.033	356.627	185.868	74.7312	157.573
evm.TU.scaffold0008.1390	164.712	161.527	163.844	154.408	172.172	175.729	158.973	208.886	160.239	188.814	142.896	179.428
evm.TU.scaffold0001.1675	212.129	194.165	180.208	182.541	227.714	237.207	156.622	198.829	180.083	152.812	208.055	170.709
evm.TU.scaffold0003.996	80.6663	75.1121	69.8642	75.9034	84.8288	100.273	429.974	611.905	392.36	469.068	369.783	353.252
evm.TU.scaffold0005.1213	117.748	144.841	129.616	152.303	123.665	131.334	236.663	233.456	181.111	166.746	150.227	221.242
evm.TU.scaffold0013.88	43.2128	32.3941	74.903	72.3131	42.6611	40.4425	984.512	458.776	452.057	501.239	339.195	379.283
evm.TU.scaffold0002.1378	157.771	164.508	160.079	170.666	148.53	167.967	260.531	307.686	266.425	274.409	197.27	273.987
evm.TU.scaffold0002.1648	73.1751	40.8694	81.391	105.186	106.854	76.8201	444.697	294.094	533.565	481.669	545.545	328.561
evm.TU.scaffold0006.622	179.632	181.425	198.096	186.506	171.889	194.931	185.03	240.05	205.229	221.53	152.519	211.592
evm.TU.scaffold0012.762	148.127	165.891	163.342	143.078	135.258	113.898	191.667	174.863	214.606	193.153	157.288	201.792
evm.TU.scaffold0007.2048	256.706	234.634	269.653	218.19	235.737	196.737	217.05	201.142	176.397	154.994	180.696	194.118
evm.TU.scaffold0015.610	160.698	150.912	182.821	138.85	120.199	99.8881	346.955	305.17	295.121	311.048	292.821	381.517
evm.TU.scaffold0007.1552	210.615	244.425	217.511	257.173	213.617	170.399	247.352	183.413	230.652	205.914	143.134	240.53
evm.TU.scaffold0010.1192	193.996	255.03	183.08	313.02	288.1	349.216	132.258	99.2381	109.886	102.849	141.694	152.216
evm.TU.scaffold0011.1008	134.926	144.538	144.234	135.082	112.622	109.215	192.7	208.652	163.573	226.994	168.644	191.505
evm.TU.scaffold0008.443	269.803	361.733	295.546	417.069	323.972	237.02	0	0	0	0.891563	0	0
novel.239	360.214	419.68	502.459	307.263	251.585	298.355	0.0165472	0.00864716	0	2.48424	0	0
evm.TU.scaffold0014.508	323.656	412.027	355.305	344.876	221.646	235.767	0	0	15.1159	0.284805	0	0.874656
evm.TU.scaffold0001.564	210.038	220.943	224.83	210.179	216.49	219.071	272.032	216.032	195.154	238.161	224.506	248.392
evm.TU.scaffold0010.601	245.405	336.53	314.701	273.441	275.146	265.319	0	0	0	2.17947	0	2.76462
evm.TU.scaffold0005.985	280.067	271.894	252.832	280.773	304.631	245.413	38.7085	22.1329	49.438	26.4868	65.3801	43.7328
evm.TU.scaffold0014.48	143.365	158.499	146.815	135.563	160.058	197.131	99.3889	83.6861	104.119	93.4343	96.2821	107.498
evm.TU.scaffold0002.700	184.206	200.879	178.626	202.779	191.298	202.123	272.434	282.674	245.4	303.121	240.694	292.609
evm.TU.scaffold0008.487	208.9	216.171	235.796	216.346	155.88	122.397	95.3326	81.4236	93.0481	81.943	174.783	97.1075
evm.TU.scaffold0005.345	214.066	220.736	215.886	204.24	266.447	265.871	198.671	126.25	188.747	211.273	304.859	235.282
evm.TU.scaffold0005.996	203.956	182.404	192.448	164.213	170.21	156.399	271.577	213.395	241.596	255.838	298.443	277.842
evm.TU.scaffold0011.1270	243.315	197.004	238.523	205.496	218.425	170.228	237.674	233.658	278.344	227.169	175.606	247.182
evm.TU.scaffold0009.293	197.512	183.468	176.435	187.482	222.15	249.091	270.519	365.656	312.331	358.249	209.839	278.306
evm.TU.scaffold0002.36	203.61	188.607	231.402	170.154	117.915	81.7235	316.611	397.576	364.383	353.215	254.832	314.876
evm.TU.scaffold0006.664	237.819	148.614	191.464	124.607	106.045	105.827	247.707	203.724	265.3	351.007	553.849	331.566
evm.TU.scaffold0003.907	123.993	126.91	129.988	151.011	129.103	138.322	219.774	316.168	271.754	343.593	215.836	313.668
evm.TU.scaffold0001.302	183.541	162.833	173.149	130.352	148.284	166.499	264.499	242.922	235.523	185.679	167.926	206.717
evm.TU.scaffold0009.1498	180.833	174.756	160.304	185.565	157.388	137.284	421.14	359.818	286.329	355.923	201.333	340.679
evm.TU.scaffold0013.730	106.038	101.863	120.171	121.225	97.8601	121.251	321.057	338.902	335.697	391.585	145.475	305.39
evm.TU.scaffold0006.408	112.991	111.93	122.204	116.126	82.4081	69.5175	283.284	274.908	297.932	236.73	125.967	246.886
evm.TU.scaffold0005.271	183.379	194.144	206.969	166.897	172.707	150.173	282.609	309.186	274.277	243.408	186.992	257.802
evm.TU.scaffold0001.1778	167.432	136.361	141.098	133.843	198.882	188.745	302.067	256.236	378.396	305.259	409.729	230.01
evm.TU.scaffold0011.871	201.629	207.286	184.914	226.732	237.153	269.461	202.23	285.336	201.618	267.896	211.613	244.437
evm.TU.scaffold0014.94	151.381	151.845	178.884	117.912	95.5361	86.483	325.385	106.392	315.844	249.221	389.903	323.254
evm.TU.scaffold0001.1819	155.032	147.684	153.381	152.572	144.92	155.333	319.951	424.247	244.523	344.999	214.1	309.794
evm.TU.scaffold0006.364	209.913	183.509	203.837	181.163	216.848	224.435	193.619	207.371	192.394	172.384	201.934	202.93
evm.TU.scaffold0005.1690	152.639	160.568	218.317	179.844	161.426	113.265	243.221	667.117	180.337	425.468	53.0174	151.782
evm.TU.scaffold0009.1010	180.786	159.631	168.727	150.274	183.33	239.632	169.932	188.378	171.919	153.376	142.608	165.471
evm.TU.scaffold0007.2639	78.6881	94.0097	96.1153	99.5567	71.7863	80.4612	349.698	288.314	262.922	305.617	181.361	282.312
evm.TU.scaffold0005.1784	230.929	246.019	239.648	239.004	218.598	198.164	169.703	140.974	156.973	150.685	195.683	169.005
evm.TU.scaffold0011.857	163.765	155.594	133.668	236.413	207.749	231.926	167.745	221.87	249.782	176.591	104.97	190.266
evm.TU.scaffold0014.517	147.007	199.925	178.773	108.427	92.4643	73.7719	151.837	129.475	190.377	106.577	135.706	198.593
evm.TU.scaffold0010.932	217.938	205.397	239.406	190.652	160.068	175.301	242.939	265.208	225.835	357.116	259.321	297.754
evm.TU.scaffold0008.1045	143.733	148.14	171.401	152.314	157.809	127.443	270.62	206.519	260.722	308.816	194.485	368.367
evm.TU.scaffold0001.2206	63.9206	59.7266	68.9568	51.7151	69.3116	64.6097	508.188	114.779	451.954	329.011	379.185	842.95
evm.TU.scaffold0014.553	169.486	168.006	146.066	131.898	139.821	127.92	212.853	182.665	202.398	156.999	150.805	185.974
evm.TU.scaffold0015.141	177.85	159.656	169.386	191.978	214.313	225.365	253.759	304.053	261.081	241.742	137.16	234.711
evm.TU.scaffold0005.1081	193.699	202.014	206.115	189.743	194.722	165.044	233.666	188.495	229.133	237.264	224.818	229.91
evm.TU.scaffold0010.347	119.998	132.201	121.103	115.614	107.34	127.643	186.498	221.709	208.646	220.161	142.325	223.139
evm.TU.scaffold0008.913	192.461	245.215	192.857	226.786	175.33	162.396	231.48	157.205	197.793	184.744	212.484	217.26
evm.TU.scaffold0002.1208	172.757	178.008	175.797	194.436	152.589	121.89	169.584	169.721	199.362	258.685	246.859	199.214
evm.TU.scaffold0002.1365	131.714	134.32	133.165	157.57	148.122	122.029	223.402	218.312	345.196	268.73	298.692	315.086
evm.TU.scaffold0008.234	151.427	137.097	136.745	120.444	113.356	100.525	184.485	177.464	177.151	175.484	173.858	191.976
evm.TU.scaffold0004.907	143.457	165.496	167.22	159.2	150.809	151.07	148.508	201.575	140.687	188.731	203.814	239.461
evm.TU.scaffold0003.828	157.6	154.807	160.188	148.605	94.4105	140.778	209.311	205.685	280.609	215.712	122.804	246.38
evm.TU.scaffold0002.1027	292.823	305.229	289.697	267.648	312.722	332.806	115.768	108.711	117.582	141.503	137.052	129.353
evm.TU.scaffold0015.102	150.056	150.441	161.012	146.919	145.193	122.429	230.598	216.68	236.014	195.44	148.996	214.146
evm.TU.scaffold0010.597	147.253	110.544	91.6332	79.2231	71.9275	86.9697	59.6333	29.7428	114.951	99.806	659.364	67.4664
evm.TU.scaffold0007.1279	148.502	157.944	182.702	147.175	143.061	103.559	183.588	144.116	163.318	147.386	148.7	148.468
evm.TU.scaffold0003.703	133.052	139.082	145.708	156.19	159.877	155.372	410.838	424.517	345.748	282.856	136.674	297.291
evm.TU.scaffold0002.1829	143.122	143.595	153.57	144.223	98.1359	82.9496	230.44	160.902	197.696	166.731	184.403	189.236
evm.TU.scaffold0011.353	164.342	184.867	193.58	136.666	162.708	159.697	139.817	134.736	118.52	150.46	110.523	138.878
evm.TU.scaffold0015.482	123.695	130.969	133.983	122.687	112.235	117.981	279.899	246.972	254.731	220.658	191.744	237.279
evm.TU.scaffold0001.2031	174.102	171.924	184.048	178.856	138.652	164.629	228.1	159.443	171.698	199.283	208.427	222.113
evm.TU.scaffold0004.217	92.3107	109.598	109.652	88.7453	100.993	96.4642	421.782	336.191	383.591	225.868	88.2031	230.154
evm.TU.scaffold0005.1128	85.4638	89.2282	92.513	92.6923	108.158	87.1074	342.032	583.813	344.18	527.798	183.73	457.725
evm.TU.scaffold0011.1252	156.044	164.112	139.188	179.959	95.6822	57.908	183.157	191.661	198.684	187.161	166.492	229.371
evm.TU.scaffold0007.1855	91.6096	91.1849	104.546	81.8708	87.8744	59.1334	97.3387	43.1215	78.9996	61.3207	149.334	149.97
evm.TU.scaffold0011.1290	172.22	174.847	165.335	152.509	157.732	186.375	151.603	155.814	131.44	159.169	168.494	178.388
evm.TU.scaffold0001.2476	160.054	162.505	162.688	191.289	162.301	158.319	278.354	252.84	273.721	318.366	160.095	289.74
evm.TU.scaffold0008.1035	129.711	142.263	140.174	137.037	152.201	141.296	195.353	186.241	182.717	164.759	195.436	223.72
evm.TU.scaffold0005.2156	209.111	188.341	207.118	157.686	175.605	199.65	212.577	227.58	227.653	202.602	201.858	208.839
evm.TU.scaffold0001.101	118.343	135.68	137.956	110.992	107.04	100.192	280.698	130.334	229.547	157.392	153.792	169.867
evm.TU.scaffold0003.1328	248.751	211.071	252.089	153.907	157.105	137.235	192.221	175.439	163.689	158.261	148.971	164.495
evm.TU.scaffold0002.1443	159.013	162.59	147.766	175.915	141.483	135.011	360.57	272.738	292.453	294.917	315.003	321.657
evm.TU.scaffold0001.845	306.959	265.014	326.336	256.944	222.768	172.671	40.9843	45.1024	62.7361	52.2142	137.718	65.1133
evm.TU.scaffold0015.34	91.533	103.497	101.345	80.8811	74.5341	51.3928	217.971	160.779	165.068	176.958	195.248	189.937
evm.TU.scaffold0010.1173	19.8368	14.5059	19.3746	28.8199	27.8405	25.3993	327.054	947.556	449.687	761.302	138.857	622.031
evm.TU.scaffold0007.1224	72.4701	75.7606	81.599	86.8575	81.3205	74.6622	203.166	120.111	163.205	146.471	140.978	215.346
evm.TU.scaffold0001.967	45.7037	47.4395	45.6436	52.2511	71.0889	46.422	430.675	170.773	463.604	166.402	558.251	736.585
evm.TU.scaffold0011.365	146.955	145.891	138.163	150.281	174.238	200.173	234.18	262.787	209.613	196.718	160.287	211.16
evm.TU.scaffold0013.286	156.318	165.172	166.627	150.757	135.807	137.564	157.908	184.517	164.849	158.958	140.116	161.969
evm.TU.scaffold0002.223	388.832	278.916	236.172	225.857	203.994	293.505	0	0	0	8.34071	0	0
evm.TU.scaffold0007.1656	141.62	143.527	149.531	159.042	146.284	151.564	278.29	219.536	212.727	247.324	178.603	292.174
evm.TU.scaffold0004.1527	155.337	191.056	191.019	140.638	119.581	111.857	203.723	140.966	166.179	174.578	151.508	193.725
evm.TU.scaffold0007.118	19.6135	16.3796	13.5131	7.75681	13.3897	3.01985	316.277	588.512	468.578	552.5	277.983	480.83
evm.TU.scaffold0001.92	158.403	142.064	162.545	152.916	125.487	126.332	206.065	196.708	220.007	222.88	159.569	196.423
evm.TU.scaffold0006.542	136.719	140.302	148.56	145.4	103.024	76.7094	137.805	102.648	130.081	108.825	174.651	144.01
evm.TU.scaffold0010.575	116.198	129.785	131.728	91.6526	74.8178	71.4992	211.32	171.001	218.22	164.378	177.515	210.087
evm.TU.scaffold0013.344	220.475	227.001	237.922	225.9	191.994	138.777	113.776	136.063	113.65	141.948	202.974	165.156
evm.TU.scaffold0001.1426	151.101	168.893	157.237	162.199	132.84	138.206	245.146	197.983	198.934	245.029	220.211	234.378
evm.TU.scaffold0008.296	40.464	44.5678	48.9878	42.787	31.2946	38.6981	434.642	534.843	498.298	508.571	212.911	552.695
evm.TU.scaffold0014.533	178.407	188.329	194.497	183.678	148.869	105.51	214.052	205.384	236.895	222.957	231.81	245.456
evm.TU.scaffold0015.21	136.14	152.219	150.292	134.669	149.867	185.426	229.571	149.338	177.455	174.894	192.091	208.317
evm.TU.scaffold0009.1358	67.1149	72.2302	73.0585	63.7101	62.3044	55.4292	283.276	140.974	237.269	286.004	260.248	297.12
evm.TU.scaffold0014.358	125.008	135.258	117.175	129.38	90.67	66.5832	271.358	237.206	245.319	260.028	273.871	278.474
evm.TU.scaffold0007.2152	91.1917	96.9252	84.6114	78.554	66.8741	55.9716	408.44	400.493	354.187	402.093	231.057	225.29
evm.TU.scaffold0010.1045	169.942	139.788	159.591	130.762	188.897	227.224	197.71	261.361	197.572	163.794	162.343	201.796
evm.TU.scaffold0002.1710	152.229	169.892	169.551	186.314	155.694	121.875	155.72	284.376	213.23	194.675	139.281	192.621
evm.TU.scaffold0010.305	121.834	165.539	153.281	180.035	119.138	146.029	131.94	166.944	160.225	341.747	140.459	326.513
evm.TU.scaffold0002.1595	112.406	136.622	134.39	135.559	149.35	139.459	213.858	194.716	180.079	193.197	185.557	217.9
evm.TU.scaffold0001.1877	167.049	138.034	162.398	154.055	112.209	109.602	239.694	226.505	246.615	245.016	296.065	216.092
evm.TU.scaffold0001.1331	88.2575	95.7677	108.334	95.6741	93.0166	81.7254	230.233	196.488	165.722	174.179	143.184	213.223
evm.TU.scaffold0008.1013	122.525	121.529	136.855	124.011	104.037	78.8134	330.549	346.642	267.586	309.492	231.028	311.904
evm.TU.scaffold0008.1007	110.355	121.454	116.253	108.143	89.1195	77.2805	391.639	356.783	321.56	346.498	205.463	393.167
evm.TU.scaffold0014.95	105.1	129.928	121.992	157.52	103.714	93.3444	397.169	211.87	352.07	372.484	227.529	355.902
evm.TU.scaffold0008.404	246.406	290.231	267.74	215.417	251.062	225.956	2.79593	5.3573	6.92242	9.06023	35.0698	8.68786
evm.TU.scaffold0004.231	145.293	157.609	160.11	146.57	138.261	105.449	343.721	330.311	297.032	367.167	229.729	305.184
evm.TU.scaffold0006.270	215.401	202.377	195.614	149.711	203.351	242.783	162.393	159.343	130.755	166.24	177.458	164.112
evm.TU.scaffold0008.264	71.1201	66.3216	57.8513	230.992	105.791	157.424	270.298	663.842	432.335	545.311	93.4489	337.43
evm.TU.scaffold0007.1425	148.597	156.865	162.254	150.668	147.203	139.327	158.502	149.489	143.423	128.91	129.601	140.386
evm.TU.scaffold0008.473	264.892	398.294	505.002	254.247	392.92	363.754	0	0	0	0.184406	0.120297	0
evm.TU.scaffold0002.1499	131.643	140.263	143.846	151.044	135.887	128.36	225.294	207.235	219.613	207.564	150.752	217.337
evm.TU.scaffold0008.442	263.909	377.651	310.459	238.617	253.577	220.288	0.182078	0	0	0.358496	0	0
evm.TU.scaffold0002.1608	112.775	122.722	119.442	133.238	119.348	111.746	302.488	361.205	214.677	274.164	181.664	285.375
evm.TU.scaffold0007.2154	174.987	184.386	166.291	138.089	124.121	129.867	62.1807	23.453	61.0722	74.3678	277.056	145.872
evm.TU.scaffold0001.2030	121.745	126.445	144.703	140.02	122.31	121.47	151.531	180.559	137.822	157.836	157.27	175.64
evm.TU.scaffold0009.1425	261.777	246.247	238.564	207.931	196.279	178.482	13.7476	5.22482	13.4443	9.84285	21.6708	9.44629
evm.TU.scaffold0008.522	79.8469	84.0663	89.1349	87.0243	99.8573	71.5073	317.92	251.193	317.503	258.953	452.632	309.763
evm.TU.scaffold0005.1729	98.3364	95.6789	91.6977	73.64	87.133	79.5116	321.597	263.055	313.474	343.941	318.92	386.28
evm.TU.scaffold0009.138	102.436	90.7538	99.1934	102.85	87.0942	77.7451	445.671	379.821	267.658	345.412	505.206	351.979
evm.TU.scaffold0007.1955	118.707	124.554	128.112	140.261	111.488	91.1526	270.02	256.279	234.114	249.992	140.459	232.298
evm.TU.scaffold0007.2007	141.497	132.384	119.174	160.871	158.363	139.464	391.421	375.839	286.565	348.856	121.715	289.943
evm.TU.scaffold0009.1062	133.382	138.656	135.628	130.881	159.226	177.425	155.917	219.721	174.535	181.83	121.588	163.896
evm.TU.scaffold0015.623	132.16	134.632	143.268	131.051	122.205	156.874	149.758	150.702	144.598	114.374	123.853	139.885
evm.TU.scaffold0011.1014	133.241	122.043	127.144	120.723	112.955	94.0092	196.8	173.348	160.398	190.412	168.081	198.672
evm.TU.scaffold0007.86	126.216	154.986	146.946	97.7166	149.36	106.922	253.714	235.637	433.472	236.809	161.465	194.114
evm.TU.scaffold0002.220	413.359	247.326	173.988	179.671	193.64	249.576	0	0.226772	0	9.18495	0	0
evm.TU.scaffold0009.519	192.892	215.9	195.543	219.719	209.403	201.246	121.732	100.104	126.447	114.43	155.133	139.803
evm.TU.scaffold0002.1865	132.839	139.779	146.811	121.327	97.9904	103.032	206.644	157.229	164.85	158.948	170	151.052
evm.TU.scaffold0007.932	146.261	184.99	173.929	163.366	110.282	91.949	183.344	67.6536	155.791	143.47	233.575	215.931
evm.TU.scaffold0007.717	106.291	108.728	105.128	93.5386	118.833	143.674	252.521	358.824	286.055	253.233	151.122	228.905
evm.TU.scaffold0004.1309	146.232	146.843	142.941	136.89	124.929	121.251	178.564	245.44	183.973	188.688	126.219	195.189
evm.TU.scaffold0005.488	124.835	148.262	159.331	100.301	100.489	121.836	328.601	285.241	235.899	321.023	142.483	225.883
evm.TU.scaffold0001.948	165.465	151.34	165.401	151.36	202.147	152.592	186.452	201.673	171.015	149.776	168.665	172.782
evm.TU.scaffold0004.218	163.089	142.489	137.889	166.342	137.212	101.37	255.01	548.955	259.004	391.46	209.969	178.083
evm.TU.scaffold0007.1408	152.478	157.018	164.004	150.5	125.032	111.807	124.567	96.39	110.351	107.926	99.9316	128.989
evm.TU.scaffold0009.226	118.227	92.702	109.304	111.134	97.3608	100.254	301.014	456.641	368.899	352.29	142.233	386.555
evm.TU.scaffold0006.61	186.675	206.447	193.168	173.718	147.648	169.605	167.584	204.342	186.241	237.683	195.943	179.384
evm.TU.scaffold0013.40	111.558	127.257	123.298	119.657	103.218	76.8912	144.919	95.5761	125.439	108.031	181.691	128.766
evm.TU.scaffold0007.758	153.565	148.893	150.159	147.678	178.003	213.752	159.28	212.547	170.56	184.087	139.661	179.901
evm.TU.scaffold0005.1866	72.1935	63.9981	68.6588	70.6106	60.9434	57.2936	349.314	425.119	382.718	446.122	162.554	425.143
gene_17416	669.409	2.9378	552.851	0	0	1.07779	0	0	2.96391	29.0501	39.5737	0.583104
evm.TU.scaffold0001.1334	181.371	180.547	175.867	190.477	140.947	139.38	209.139	199.735	191.043	224.885	192.782	226.307
evm.TU.scaffold0013.517	68.9417	72.5876	76.5368	63.1854	65.8957	67.0884	335.839	319.23	301.552	300.173	122.099	285.307
evm.TU.scaffold0002.1884	144.311	136.84	128.955	118.405	90.9081	83.5997	140.235	144.895	167.539	140.304	79.206	149.612
evm.TU.scaffold0006.876	122.03	120.843	116.092	139.482	154.132	177.335	204.85	331.228	210.246	236.396	116.437	247.762
evm.TU.scaffold0007.1291	96.4687	101.749	102.632	115.275	103.994	91.8537	206.823	216.289	224.474	206.873	123.28	214.126
evm.TU.scaffold0014.520	163.562	166.294	171.119	166.01	172.422	176.574	145.901	146.085	139.994	136.16	140.997	140.795
evm.TU.scaffold0004.327	360.371	479.473	453.296	315.912	232.632	248.512	0.460833	0	0.236064	0	1.33178	1.39326
evm.TU.scaffold0014.360	83.3556	79.8232	74.7642	112.995	114.347	136.142	346.819	530.706	305.01	367.96	123.264	342.842
evm.TU.scaffold0002.2032	88.4371	126.693	115.983	107.17	65.3233	31.7119	110.157	70.3865	100.801	134.077	121.31	136.749
evm.TU.scaffold0005.1790	258.373	190.957	187.774	179.671	210.107	187.805	221.026	155.112	201.546	181.421	379.294	271.726
evm.TU.scaffold0010.1361	201.106	188.566	185.55	193.516	192.541	175.016	179.03	184.16	152.4	171.678	181.795	213.986
evm.TU.scaffold0011.1272	194.614	191.944	203.579	192.374	243.59	236.591	109.33	156.506	127.271	183.125	112.307	119.319
evm.TU.scaffold0009.581	433.012	276.76	272.514	310.931	379.598	364.075	0.0688812	0	2.11708	0	0.265417	0.138834
evm.TU.scaffold0002.1484	178.679	172.418	174.606	170.52	168.969	171.588	124.472	141.03	152.075	129.954	155.118	126.052
novel.319	194.717	164.5	209.175	161.888	151.942	144.606	149.639	136.218	134.74	106.535	152.7	144.393
evm.TU.scaffold0001.14	105.738	118.964	124.542	105.437	107.84	112.282	159.178	188.678	158.746	156.453	129.287	154.819
evm.TU.scaffold0013.573	124.505	114.775	119.756	136.863	121.588	129.55	219.781	364.111	229.528	256.519	193.312	244.638
evm.TU.scaffold0007.2055	163.071	172.673	181.522	153.581	150.472	123.898	235.798	184.758	232.224	270.907	249.823	222.907
evm.TU.scaffold0014.159	117.353	113.476	111.725	115.973	127.03	117.546	318.937	292.846	278.051	293.983	348.524	259.935
evm.TU.scaffold0007.1602	143.44	135.511	141.084	157.41	159.17	155.407	268.316	367.179	182.844	203.615	191.706	222.237
evm.TU.scaffold0007.767	180.597	165.619	182.713	140.272	159.203	144.693	200.703	203.188	176.946	225.352	154.045	168.153
evm.TU.scaffold0001.555	207.123	187.919	197.737	199.394	186.394	208.919	141.518	125.883	135.583	136.184	173.498	138.938
evm.TU.scaffold0010.103	216.977	302.982	299.357	300.151	303.149	261.364	5.78602	2.60657	6.54105	5.20505	7.68794	8.8471
evm.TU.scaffold0013.213	220.527	212.054	203.709	197.128	274.028	285.819	122.195	134.937	122.706	108.01	143.918	128.846
evm.TU.scaffold0011.1030	150.688	142.674	147.904	160.184	139.808	118.533	171.168	209.525	215.076	202.876	196.381	179.912
evm.TU.scaffold0001.939	78.3705	76.236	65.8395	69.158	71.2249	93.8971	321.714	255.908	241.251	250.378	202.16	259.773
evm.TU.scaffold0008.1178	103.091	92.5408	121.659	87.0076	85.5127	81.2962	253.924	237.916	195.872	199.689	314.838	199.422
evm.TU.scaffold0012.314	162.798	169.415	180.978	182.181	186.4	176.808	119.823	167.189	137.48	124.476	76.0845	131.462
evm.TU.scaffold0006.755	154.625	162.373	160.456	137.963	141.802	144.082	246.414	449.254	225.538	267.178	129.477	189.942
gene_11232	115.615	128.932	108.49	106.83	118.927	135.489	136.401	174.688	161.944	202.248	123.629	193.158
evm.TU.scaffold0014.603	140.018	157.463	162.698	168.995	166.548	148.922	140.534	125.746	140.216	127.974	124.215	133.794
evm.TU.scaffold0010.376	161.426	162.991	169.441	152.139	137.778	106.796	212.537	179.497	182.816	196.126	149.429	158.378
evm.TU.scaffold0007.1599	117.676	114.064	98.1944	138.29	83.9045	60.0343	307.047	290.711	243.818	199.902	215.337	239.837
evm.TU.scaffold0005.145	191.365	173.834	203.57	233.185	179.771	145.048	168.997	82.5042	88.9173	73.3452	88.6791	109.332
evm.TU.scaffold0004.670	160.746	165.044	165.555	116.783	60.825	61.7696	110.044	82.1513	146.462	113.653	154.277	157.438
evm.TU.scaffold0007.26	99.2631	104.968	99.1288	119.694	115.913	111.506	268.036	306.587	296.357	306.152	126.875	343.446
evm.TU.scaffold0009.31	100.962	103.279	105.897	143.529	111.98	119.622	111.347	123.125	77.751	99.218	149.649	121.706
evm.TU.scaffold0008.1319	121.355	119.181	111.37	98.625	101.154	94.7966	202.717	155.501	155.374	153.628	155.703	148.067
evm.TU.scaffold0010.1403	23.7958	20.4089	23.0162	76.3597	75.2266	26.0942	411.854	270.81	381.197	706.723	148.931	619.232
evm.TU.scaffold0010.587	214.24	189.841	212.356	173.759	184.434	154.893	180.217	192.578	187.598	170.129	182.295	159.882
evm.TU.scaffold0008.1014	169.594	168.364	163.808	160.021	153.442	123.484	196.973	209.494	262.179	192.609	128.356	198.422
evm.TU.scaffold0005.1218	161.694	139.419	158.324	159.876	195.095	187.522	238.15	272.361	231.568	255.882	183.141	205.393
evm.TU.scaffold0010.890	307.011	284.329	274.49	218.931	255.491	273.806	87.8622	82.9389	84.9143	126.426	197.557	100.045
evm.TU.scaffold0011.370	184.304	186.427	190.917	150.576	223.872	241.486	114.984	158.143	132.977	124.555	119.852	121.064
evm.TU.scaffold0002.2057	129.703	131.068	123.897	130.574	155.903	158.835	167.357	133.438	150.959	128.162	144.201	164.778
evm.TU.scaffold0007.2511	135.589	144.151	136.474	143.618	147.05	160.504	211.827	208.476	204.359	204.625	167.496	213.92
evm.TU.scaffold0007.2614	156.394	148.289	169.857	155.707	145.44	137.033	151.263	149.669	158.569	162.542	138.149	180.762
evm.TU.scaffold0009.1380	133.873	150.191	145.794	119.257	84.6259	68.6068	237.959	148.119	196.012	217.876	128.743	207.26
evm.TU.scaffold0002.1961	112.481	92.0633	115.579	91.3064	91.9153	86.4909	261.605	234.287	204.068	193.429	175.97	195.169
evm.TU.scaffold0005.73	147.659	152.482	136.833	135.999	118.013	134.754	198.829	152.453	199.458	204.477	161.037	192.921
evm.TU.scaffold0006.22	90.5519	103.34	116.505	66.4275	47.8424	47.3051	273.94	244.147	274.454	257.046	234.039	232.277
gene_4923	107.513	142.216	118.244	105.892	92.2251	86.7132	186.731	181.143	204.51	204.283	134.784	195.075
evm.TU.scaffold0010.374	84.8767	92.8184	93.8238	107.903	105.623	97.383	144.947	243.842	148.709	144.107	156.811	170.661
evm.TU.scaffold0013.554	126.526	145.869	142.334	119.205	127.5	112.563	137.008	142.757	129.097	137.894	129.299	143.266
evm.TU.scaffold0009.687	91.5041	111.974	95.6092	85.3672	44.8676	29.8159	191.01	126.026	166.173	158.207	158.921	153.352
evm.TU.scaffold0007.2134	138.904	139.252	150.312	126.581	115.487	114.785	177.747	147.916	173.33	154.25	142.465	158.021
evm.TU.scaffold0010.1240	114.997	94.001	69.0197	38.246	49.4165	27.9811	2.00285	3.22043	2870.19	1.51671	4.15558	2.95002
evm.TU.scaffold0010.943	106.43	114.669	111.912	124.512	125.86	81.3558	157.622	232.039	230.611	193.759	154.807	191.014
evm.TU.scaffold0015.120	111.388	97.9007	118.742	82.2059	78.4871	78.5125	212.821	233.141	183.132	176.064	126.744	193.913
evm.TU.scaffold0007.1414	101.257	125.632	116.317	123.915	116.333	123.201	187.188	144.268	157.37	153.537	151.206	173.657
evm.TU.scaffold0002.850	128.201	138.133	129.541	126.349	112.617	122.495	145.708	164.671	153.382	159.217	151.295	153.233
evm.TU.scaffold0013.814	196.309	154.132	185.634	167.347	223.435	247.489	123.25	150.941	137.116	92.4684	131.973	130.34
evm.TU.scaffold0009.24	98.8671	104.594	100.842	102.914	64.714	78.3804	310.275	258.844	190.22	262.427	177.29	214.525
evm.TU.scaffold0004.803	66.1638	49.0643	51.3818	72.7567	44.6098	24.5003	459.81	474.678	354.478	347.227	221.858	518.842
evm.TU.scaffold0007.742	184.184	135.514	143.598	157.644	141.202	199.108	109.238	133.812	133.175	77.2827	143.891	120.939
evm.TU.scaffold0004.1604	116.324	123.759	131.786	140.187	129.98	111.821	292.892	311.433	255.458	279.845	104.123	298.037
evm.TU.scaffold0008.375	103.104	124.321	114.814	98.5746	94.7315	106.263	155.318	136.536	147.825	149.701	122.1	154.796
evm.TU.scaffold0010.1359	73.8477	90.2325	98.7234	96.9318	81.3916	81.7004	300.356	512.99	293.586	477.557	125.559	290.979
evm.TU.scaffold0007.1237	121.381	124.784	134.356	143.934	80.2236	54.143	331.264	291.795	285.636	339.947	182.775	325.138
evm.TU.scaffold0010.430	145.896	139.496	144.821	141.821	159.71	184.007	93.8567	149.118	111.117	81.9199	82.2788	100.526
evm.TU.scaffold0007.1223	84.7748	97.7968	105.526	98.4394	104.794	103.775	244.516	303.9	215.339	185.155	148.109	259.392
evm.TU.scaffold0014.723	141.305	133.497	121.952	169.684	182.886	183.161	204.008	298.218	235.213	217.876	132.787	219.179
evm.TU.scaffold0001.2220	212.028	215.82	234.818	208.675	234.801	235.546	116.811	154.428	140.883	164.86	118.625	117.577
evm.TU.scaffold0002.1667	158.485	155.684	162.846	116.602	115.296	135.61	241.528	209.824	214.104	271.839	177.883	217.858
evm.TU.scaffold0005.859	117.03	114.481	111.747	194.087	145.558	137.453	240.428	370.323	234.288	257.197	84.6381	195.179
evm.TU.scaffold0002.1220	148.159	161.536	129.861	155.552	150.81	144.067	116.474	100.96	123.432	125.735	154.499	176.536
evm.TU.scaffold0005.1858	135.85	146.211	140.234	146.08	159.704	178.933	214.091	226.195	258.657	292.55	119.828	225.767
evm.TU.scaffold0007.1953	89.3656	94.9222	98.1493	95.3952	91.3509	85.121	156.88	175.233	160.994	152.371	152.518	168.968
evm.TU.scaffold0002.864	99.9194	88.3501	111.071	132.335	78.0584	88.68	144.991	87.7741	195.88	122.885	184.672	165.156
evm.TU.scaffold0014.389	203.241	208.094	210.788	200.884	182.347	165.465	150.141	144.653	141.931	136.674	152.867	147.896
evm.TU.scaffold0002.126	218.006	250.577	224.195	208.69	159.298	101.281	88.5772	67.7648	78.718	53.2752	88.5243	91.3244
evm.TU.scaffold0003.1285	168.998	165.093	167.651	176.595	194.41	226.639	161.925	187.351	179.116	171.154	200.438	195.626
evm.TU.scaffold0001.1405	209.965	189.29	217.081	204.724	174.939	195.352	117.529	91.1361	140.459	113.068	167.463	119.961
evm.TU.scaffold0007.703	121.915	122.126	130.001	118.153	143.306	163.143	150.39	150.455	123.026	106.437	128.885	132.107
evm.TU.scaffold0002.405	184.646	166.096	142.548	187.377	186.411	173.872	277.921	224.812	164.115	176.587	66.8619	233.492
evm.TU.scaffold0013.542	136.933	156.419	149.885	179.235	168.716	192.68	160.191	178.652	171.554	191.052	140.763	187.742
evm.TU.scaffold0004.128	124.889	137.162	127.347	194.892	160.083	177.702	197.002	206.528	190.701	195.638	117.312	208.136
evm.TU.scaffold0013.702	140.902	149.71	136.493	133.298	120.993	132.077	193.806	218.754	185.853	196.134	201.103	222.022
evm.TU.scaffold0004.1668	128.771	153.095	139.007	169.918	132.985	127.523	217.051	233.184	183.737	203.292	136.869	203.584
evm.TU.scaffold0015.15	217.092	191.854	231.126	119.111	125.915	81.0693	180.847	133.901	146.765	101.685	137.707	138.572
evm.TU.scaffold0011.846	130.191	132.201	124.485	126.548	170.361	199.84	118.806	149.166	115.346	117.387	118.721	112.879
evm.TU.scaffold0007.1971	80.1253	83.7274	87.726	95.5286	73.0912	53.1398	328.86	258.224	275.276	332.386	153.927	293.314
evm.TU.scaffold0007.1460	194.628	209.145	196.037	179.368	195.175	217.999	14.3136	18.9491	29.8874	36.2343	142.744	29.8116
evm.TU.scaffold0002.1889	15.961	21.7254	17.9393	30.3462	27.9146	22.8088	349.043	619.23	348.177	539.446	138.827	431.028
evm.TU.scaffold0005.398	109.432	107.666	102.175	94.2861	103.027	109.082	296.899	376.292	221.023	257.827	139.007	232.889
evm.TU.scaffold0010.611	202.817	314.765	266.133	312.963	377.08	285.947	0	0	0	0.989669	0.0484206	0.911804
evm.TU.scaffold0007.956	104.037	122.587	118.882	112.15	110.781	107.696	218.429	183.043	173.011	168.122	149.308	176.313
evm.TU.scaffold0008.1146	405.638	318.913	331.889	281.828	335.226	238.305	0.0402428	0.0841194	0.426034	0.0132058	0.155066	0.0135186
evm.TU.scaffold0011.998	141.205	125.868	128.532	135.532	130.462	122.776	223.654	244.262	192.157	158.015	101.754	189.177
evm.TU.scaffold0010.1115	338.532	276.8	169.281	266.694	397.157	498.178	41.4853	18.6471	33.7341	33.058	154.055	52.9179
evm.TU.scaffold0015.87	130.901	130.56	160.513	108.123	98.0513	71.074	231.148	143.156	176.51	191.425	274.3	204.893
evm.TU.scaffold0007.2064	137.258	162.184	160.273	149.17	119.365	101.273	140.393	145.031	146.941	142.289	128.687	146.107
novel.1866	140.739	161.819	154.655	151.229	157.164	164.369	117.607	97.4325	107.951	96.5666	138.122	138.798
evm.TU.scaffold0012.58	100.639	103.446	107.901	109.649	118.905	119.505	179.06	176.19	154.4	142.825	132.424	160.329
evm.TU.scaffold0007.2650	87.8957	93.612	90.2444	92.3674	77.9365	77.0382	87.6055	76.8268	126.007	98.8477	143.286	122.645
evm.TU.scaffold0004.1257	100.34	121.448	106.41	123.814	109.835	104.659	89.3234	86.0648	80.4085	77.7558	95.7672	90.0184
evm.TU.scaffold0011.330	105.516	111.693	113.566	149.686	132.644	143.636	153.419	185.046	162.308	183.37	153.578	188.118
evm.TU.scaffold0007.1583	92.951	106.01	93.0506	84.6785	85.5224	63.371	170.715	180.99	253.414	209.412	147.415	227.493
evm.TU.scaffold0007.1079	120.335	141.015	132.192	106.204	90.8701	110.642	109.356	75.1749	110.702	121.113	100.955	134.15
evm.TU.scaffold0005.1873	76.6649	52.0979	52.0598	55.7113	59.8521	53.7133	319.502	223.805	238.332	525.105	470.93	371.524
evm.TU.scaffold0015.621	92.695	110.936	96.7905	112.36	98.2599	118.911	178.909	136.866	183.866	190.56	207.917	199.576
evm.TU.scaffold0002.558	94.6476	95.5093	90.3369	120.218	125.831	177.463	144.13	149.954	118.643	138.78	116.699	166.221
evm.TU.scaffold0001.1898	166.142	182.966	166.19	178.879	168.759	157.724	161.847	153.697	152.796	188.04	149.087	165.205
evm.TU.scaffold0015.71	105.306	119.169	110.159	122.682	107.717	110.147	170.512	121.953	162.716	181.93	241.698	177.14
evm.TU.scaffold0009.805	249.123	231.333	195.297	225.143	222.963	204.401	137.242	168.177	82.9082	141.968	169.077	119.946
evm.TU.scaffold0007.2146	95.9283	97.7856	107.241	94.9122	82.2407	67.789	300.815	298.633	272.671	334.108	155.262	289.62
evm.TU.scaffold0005.1630	93.0165	161.827	106.667	121.212	175.922	134.694	3.51062	20.9955	79.7259	45.6008	88.0215	61.9139
evm.TU.scaffold0015.670	189.787	203.01	150.673	213.8	212.901	219.661	101.231	140.015	83.5122	98.4881	138.471	68.8656
evm.TU.scaffold0002.22	187.175	178.356	166.659	144.92	140.932	111.779	155.3	71.7424	133.499	126.424	159.96	108.314
evm.TU.scaffold0013.25	73.3017	94.7997	72.5028	97.3077	73.2706	74.5849	166.725	123.029	153.102	123.423	100.96	156.556
evm.TU.scaffold0014.503	61.5571	88.9317	90.9669	60.7675	77.0467	53.7676	344.373	424.197	291.979	363.609	221.651	351.208
evm.TU.scaffold0005.1048	126.46	124.613	123.013	132.045	134.686	144.859	146.049	166.88	139.912	147.684	199.492	178.812
gene_14995	199.554	194.007	184.745	170.135	157.684	137.692	143.204	129.375	133.376	140.327	159.419	165.666
evm.TU.scaffold0011.336	221.103	234.607	245.585	217.235	158.58	156.8	136.991	145.959	156.414	203.894	148.211	132.391
evm.TU.scaffold0014.519	120.594	122.317	97.661	92.6386	91.598	87.0291	188.1	271.363	199.69	234.525	149.788	198.882
evm.TU.scaffold0012.904	128.636	184.178	137.282	190.719	165.504	175.556	112.605	146.53	168.259	147.441	130.554	121.106
evm.TU.scaffold0008.1321	125.058	139.902	122.192	118.411	140.737	129.492	107.94	112.285	137.261	111.737	100.084	124.575
evm.TU.scaffold0014.794	88.8636	108.842	88.9613	85.5193	61.491	116.511	102.191	161.844	157.043	67.8392	89.5782	207.155
evm.TU.scaffold0014.219	141.413	131.065	155.657	100.07	93.4575	116.001	143.607	148.407	170.501	131.333	163.937	115.509
evm.TU.scaffold0001.1056	234.703	262.614	250.003	240.377	250.972	232.194	13.1269	14.6631	27.8869	24.797	118.182	19.9436
evm.TU.scaffold0008.650	80.9565	70.1797	58.9187	83.5493	104.875	112.567	246.226	254.475	291.517	279.809	369.585	222.505
evm.TU.scaffold0002.472	131.488	135.651	127.437	128.259	142.904	168.371	134.54	135.482	176.189	167.295	257.156	130.545
evm.TU.scaffold0005.1107	105.592	100.209	104.334	109.483	108.487	111.241	210.798	239.587	226.692	216.188	126.659	234.943
evm.TU.scaffold0007.2652	101.208	106.076	100.967	101.636	85.7703	89.2064	191.745	165.22	179.486	175.033	96.9236	179.367
evm.TU.scaffold0007.212	191.547	237.91	258.134	213.013	221.877	169.34	32.1036	33.8769	35.3401	41.195	103.569	42.394
evm.TU.scaffold0012.318	127.057	127.817	122.229	172.928	134.782	125.087	213.478	198.402	208.094	285.226	168.919	240.04
evm.TU.scaffold0007.1285	92.9199	108.414	101.464	108.647	92.5451	94.6544	187.019	176.911	204.223	171.048	108.257	199.027
evm.TU.scaffold0006.674	98.3168	103.014	121.025	86.3154	100.03	93.8518	104.825	91.8868	104.622	75.5657	99.3504	92.6908
evm.TU.scaffold0001.2397	109.822	126.266	116.53	143.442	121.432	115.435	155.55	113.369	123.73	115.299	120.319	135.217
evm.TU.scaffold0015.72	104.015	111.3	101.086	109.715	113.032	113.886	249.177	265.132	190.217	253.929	193.974	231.007
evm.TU.scaffold0011.1184	124.064	144.54	127.323	126.531	153.83	183.332	118.208	110.755	119.505	113.295	105.846	126.213
evm.TU.scaffold0006.986	170.024	168.024	161.832	159.566	129.667	118.777	126.112	203.077	278.91	228.774	133.429	195.459
evm.TU.scaffold0004.80	151.762	155.531	139.198	133.006	136.602	116.496	180.473	213.699	183.327	209.08	149.508	192.682
evm.TU.scaffold0009.1150	121.914	143.549	145.151	138.997	114.307	109.699	154.993	151.83	143.909	130.142	136.067	169.488
evm.TU.scaffold0002.1759	168.253	183.739	199.605	175.562	133.669	98.3949	80.281	37.3001	170.859	58.9251	178.6	102.847
evm.TU.scaffold0008.539	181.865	187.097	196.048	150.366	154.773	157.751	154.978	140.521	120.63	155.282	230.188	147.408
evm.TU.scaffold0007.2069	191.147	171.304	198.57	150.217	148.543	144.447	80.9928	30.1167	45.759	70.0079	152.078	125.805
evm.TU.scaffold0009.992	162.938	177.52	181.214	171.556	136.33	120.425	131.369	109.314	128.071	155.105	141.798	131.944
evm.TU.scaffold0005.1682	150.913	136.125	140.135	138.341	119.095	113.002	97.7877	111.522	107.066	93.693	103.305	102.802
evm.TU.scaffold0006.1097	84.5699	68.1282	80.168	129.611	93.4452	116.193	215.006	385.317	298.828	385.43	171.572	232.777
evm.TU.scaffold0015.544	105.642	116.079	107.601	103.428	116.974	143.53	121.93	106.638	99.9778	94.8192	98.9002	120.532
evm.TU.scaffold0012.292	168.335	159.262	172.461	172.682	217.04	199.476	120.327	153.831	122.887	136.437	132.958	125.594
evm.TU.scaffold0003.616	134.629	112.552	99.1701	98.1472	126.851	120.222	226.166	219.789	286.631	212.644	324.381	231.484
evm.TU.scaffold0005.540	126.304	114.494	114.133	118.821	91.6414	86.1581	260.214	163.522	275.053	229.298	268.323	209.283
evm.TU.scaffold0002.787	187.697	218.196	214.191	166.529	237.468	247.329	71.5388	105.416	75.6229	82.2477	79.2637	76.5536
evm.TU.scaffold0007.1094	142.423	158.773	130.149	166.369	133.603	152.848	174.363	170.818	188.739	193.879	232.655	189.776
evm.TU.scaffold0013.87	272.282	283.16	209.527	265.064	238.287	231.424	93.1289	70.1356	75.0756	89.4006	64.263	68.9948
evm.TU.scaffold0004.1216	127.363	129.557	119.533	120.41	128.17	134.444	160.597	193.536	196.009	142.004	98.5217	171.922
evm.TU.scaffold0007.1120	150.415	155.182	184.323	121.967	132.362	135.031	138.459	171.719	86.3579	166.156	114.673	128.599
evm.TU.scaffold0013.50	94.1591	111.042	112.851	102.959	84.139	80.4494	120.68	87.2532	142.056	128.772	79.6251	124.326
evm.TU.scaffold0003.451	155.414	135.005	143.829	163.302	172.299	152.667	265.578	279.053	154.595	216.245	77.7539	202.88
evm.TU.scaffold0001.1504	139.157	145.885	134.025	140.643	155.891	182.388	139.915	205.527	134.92	197.64	161.052	172.077
evm.TU.scaffold0007.1629	106.295	97.5907	97.4981	110.913	104.502	82.4721	347.842	235.25	241.123	284.526	226.174	258.967
evm.TU.scaffold0011.69	100.609	122.944	116.798	114.254	97.0153	79.4242	184.755	150.505	153.89	158.077	123.068	168.269
evm.TU.scaffold0005.569	126.685	114.969	116.209	113.72	126.391	175.905	192.597	172.78	157.264	199.55	166.289	213.99
evm.TU.scaffold0011.1117	127.139	119.364	137.849	141.803	111.189	116.823	178.637	215.808	228.943	201.493	163.359	218.588
evm.TU.scaffold0009.1250	88.296	81.0924	96.2869	85.0005	76.2827	113.251	98.243	91.1763	105.051	102.53	81.4515	102.795
evm.TU.scaffold0004.1225	172.881	153.781	174.683	152.921	179.318	197.196	120.864	125.312	123.387	116.243	129.022	128.823
evm.TU.scaffold0002.1769	125.029	105.637	115.079	115.478	147.204	136.663	112.422	129.959	106.452	94.1453	122.128	152.533
evm.TU.scaffold0008.350	94.5411	96.9022	99.384	100.271	87.4873	69.3577	249.241	234.084	276.34	364.81	227.894	300.089
evm.TU.scaffold0010.35	104.051	105.688	100.795	91.6089	84.0465	78.3471	157.224	140.399	125.608	112.67	135.194	149.076
evm.TU.scaffold0008.916	103.128	97.3857	99.0375	93.5031	83.5546	101.155	137.666	95.9208	99.4793	91.9085	91.4588	120.326
evm.TU.scaffold0009.925	130.832	123.459	123.105	119.098	130.953	152.178	119.644	152.259	134.132	143.832	100.632	148.514
evm.TU.scaffold0002.458	131.417	117.964	112.278	115.954	107.846	87.4876	169.241	147.786	210.324	147.485	101.871	168.136
evm.TU.scaffold0011.807	103.187	100.441	102.236	108.461	111.591	109.49	253.325	314.378	237.02	352.795	216.903	247.663
evm.TU.scaffold0007.851	144.568	149.182	151.28	106.523	135.988	167.359	130.88	124.307	116.375	109.092	132.366	136.656
evm.TU.scaffold0007.2444	122.239	128.269	132.543	117.852	136.738	129.534	125.699	167.211	137.972	123.351	101.562	126.354
evm.TU.scaffold0001.975	207.895	245.016	227.798	231.139	209.565	225.067	9.53684	13.0262	18.4555	20.7146	92.9391	15.1539
evm.TU.scaffold0001.195	200.267	225.871	213.952	224.795	276.682	295.304	94.657	119.307	72.4041	134.223	102.922	95.9106
evm.TU.scaffold0001.1397	112.317	103.093	113.208	87.5339	97.6089	80.4264	329.823	251.28	294.1	177.428	240.809	314.575
evm.TU.scaffold0013.581	97.0496	113.413	105.031	105.345	87.8847	94.5573	131.195	185.847	182.384	182.408	108.883	160.489
evm.TU.scaffold0004.188	281.173	303.045	227.142	281.326	262.862	279.954	57.9104	58.3828	52.692	90.4231	73.6226	48.6458
evm.TU.scaffold0010.677	157.039	181.587	192.045	160.54	209.525	207.866	12.1916	7.45754	12.7809	13.0721	22.032	18.0487
evm.TU.scaffold0001.1285	135.407	128.292	134.768	123.959	129.291	119.491	176.17	207.606	166.29	174.673	186.496	191.719
evm.TU.scaffold0010.637	175.838	143.022	165.672	148.524	151.962	167.743	177.175	175.996	158.315	168.355	176.019	184.92
evm.TU.scaffold0008.1087	70.8435	93.3802	94.5684	69.7873	48.5946	41.187	133.698	72.783	121.097	111.888	94.7538	129.324
evm.TU.scaffold0008.1141	468.714	280.984	242.121	337.765	383.533	172.727	0.0134212	0.112217	3.78128	0.237827	0.21979	0.067628
evm.TU.scaffold0001.93	133.114	124.646	120.723	140.235	137.505	163.439	131.261	181.304	150.952	144.775	110.099	148.535
evm.TU.scaffold0003.89	87.745	98.5204	97.2317	58.9968	68.7981	62.0464	82.7937	111.001	40.776	79.8307	62.9439	43.1132
evm.TU.scaffold0001.320	30.9591	39.7219	30.407	53.6907	61.3579	61.6203	157.995	405.435	378.294	427.61	125.453	384.62
evm.TU.scaffold0011.1269	127.496	113.103	121.083	137.946	161.557	155.697	176.674	209.556	221.893	220.182	128.143	221.131
evm.TU.scaffold0011.940	137.791	154.194	151.363	152.781	148.945	140.732	121.714	137.614	120.872	140.884	91.8901	124.928
evm.TU.scaffold0007.1825	87.6443	80.7896	91.7834	86.111	50.9707	33.863	253.686	186.934	167.501	206.33	148.797	190.415
evm.TU.scaffold0011.1010	147.002	159.409	175.463	158.261	165.273	167.67	222.63	181.692	167.528	202.147	123.446	144.583
evm.TU.scaffold0010.248	162	152.2	149.71	160.355	175.138	197.586	179.502	189.684	177.922	223.337	182.863	173.111
evm.TU.scaffold0009.1464	200.829	196.386	192.706	173.878	220.967	208.922	99.0541	180.254	127.055	168.394	110.033	124.81
evm.TU.scaffold0010.1377	104.057	120.416	115.096	88.3481	78.4924	59.7798	162.278	119.609	172.251	152.602	119.771	131.605
evm.TU.scaffold0005.1312	94.1591	114.721	102.752	110.239	82.5043	91.3428	138.864	181.055	160.407	156.87	124.239	177.905
evm.TU.scaffold0004.645	222.487	214.656	211.5	204.77	183.197	152.168	77.127	91.3634	100.651	104.291	129.547	82.3259
evm.TU.scaffold0001.2475	100.146	110.747	123.223	115.159	103.738	70.5811	190.893	196.933	161.174	172.951	129.766	191.826
evm.TU.scaffold0003.227	95.4476	113.936	123.444	88.3527	78.0025	97.9584	190.824	125.321	166.369	148.398	129.04	171.248
novel.1415	139.102	114.392	145.114	120.848	103.313	121.302	169.902	187.64	175.89	184.155	163.747	205.159
evm.TU.scaffold0011.40	279.604	224.704	203.32	181.928	202.369	132.697	0	0	436.806	0.497181	0.432446	0.339306
evm.TU.scaffold0002.1159	171.258	159.174	157.717	165.797	150.392	135.39	240.651	136.691	170.165	196.003	193.205	221.851
evm.TU.scaffold0009.1422	322.598	269.774	251.343	197.255	232.914	171.613	0.646519	0.30714	5.6602	0.752193	2.7743	71.6112
evm.TU.scaffold0001.962	141.12	161.168	153.13	151.198	162.798	192.42	87.3365	78.4662	97.8713	76.0011	106.233	106.06
evm.TU.scaffold0003.65	139.767	158.678	177.561	130.703	80.9068	67.2487	131.498	110.223	119.702	130.962	116.768	190.293
evm.TU.scaffold0002.1890	131.641	155.137	145.252	142.265	121.629	136.298	102.705	73.3757	112.197	93.2341	100.176	104.01
evm.TU.scaffold0005.1608	86.2079	97.3147	103.737	92.944	80.2325	105.758	122.591	121.071	165.485	147.742	72.2266	134.478
evm.TU.scaffold0007.1577	121.694	132.945	136.755	136.574	161.537	140.504	157.894	172.653	132.385	130.414	109.649	133.149
evm.TU.scaffold0008.1074	162.967	162.84	176.77	157.423	157.941	126.429	111.027	114.661	106.755	107.067	117.054	114.231
evm.TU.scaffold0010.1247	122.106	134.628	129.973	126.776	110.242	92.0546	218.759	151.022	267.283	215.595	271.207	185.712
evm.TU.scaffold0004.1478	180.678	178.681	177.004	180.867	150.42	141.46	59.7613	60.5157	68.0853	67.0105	161.36	69.7226
evm.TU.scaffold0001.363	162.604	120.383	126.267	89.5412	202.245	79.9157	156.104	127.219	147.502	122.686	160.809	134.419
evm.TU.scaffold0003.1348	120.681	114.758	118.813	104.681	138.379	157.627	116.444	151.559	126.522	118.728	111.649	105.87
evm.TU.scaffold0014.516	92.8678	100.83	107.599	96.0346	79.9492	76.7926	125.474	144.616	107.463	125.843	129.112	143.319
evm.TU.scaffold0010.653	90.9577	112.096	85.0742	92.7854	89.2474	87.301	158.175	104.769	173.389	118.55	178.709	157.438
evm.TU.scaffold0008.997	101.922	107.919	112.277	110.735	96.8247	77.7706	141.876	159.547	122.721	112.245	88.6276	129.362
evm.TU.scaffold0001.650	105.393	109.471	114.997	104.615	90.7706	81.6008	197.598	186.891	164.267	175.744	151.861	180.36
evm.TU.scaffold0002.2079	176.754	120.529	213.262	54.1975	80.2277	51.7776	230.675	171.072	173.317	174.439	162.558	126.66
evm.TU.scaffold0012.899	271.178	203.114	184.38	203.193	251.671	216.58	0.598554	1.56394	236.704	4.71401	5.76595	4.52408
evm.TU.scaffold0010.546	210.145	188.205	204.954	138.083	114.71	155.764	99.5164	66.2345	98.7917	87.6063	98.2994	90.8841
evm.TU.scaffold0009.1298	103.937	95.5264	96.5893	108.246	100.99	112.246	207.533	206.266	144.672	216.415	142.403	273.166
evm.TU.scaffold0001.1025	184.332	221.768	224.204	158.647	195.934	138.814	16.638	24.772	31.4002	31.1497	35.4296	34.8294
evm.TU.scaffold0010.1034	92.9293	102.298	107.912	98.1166	81.686	64.3375	125.669	138.007	127.116	94.4215	124.642	115.133
evm.TU.scaffold0009.286	118.674	110.629	130.789	112.283	133.636	127.133	183.117	195.866	179.538	197.462	91.3912	190.277
evm.TU.scaffold0001.60	133.437	83.8206	133.182	94.1373	66.1664	64.9241	140.518	221.013	352.282	168.306	92.0997	159.798
evm.TU.scaffold0014.282	149.104	154.667	159.934	122.482	145.723	190.912	156.478	142.466	152.729	180.935	191.311	167.728
evm.TU.scaffold0004.5	217.643	205.756	144.239	202.798	213.44	258.04	93.0377	84.9887	87.2625	125.565	234.749	103.115
evm.TU.scaffold0001.1041	84.5231	88.1341	78.87	97.2903	112.674	91.0173	153.517	331.853	192.269	168.775	112.706	171.751
evm.TU.scaffold0002.37	70.6534	99.9472	83.513	83.3779	64.3859	59.8953	228.217	190.98	194.761	268.214	143.692	215.766
evm.TU.scaffold0002.43	137.495	169.517	204.688	202.246	288.536	260.619	0.0309229	0	0	0	0	0
novel.1450	15.8111	15.0464	11.4896	11.4581	14.5569	12.2472	86.5864	42.5083	85.8888	261.356	521.207	692.666
evm.TU.scaffold0002.1145	131.256	132.284	145.881	135.32	153.158	131.371	168.066	222.407	171.383	205.445	148.228	168.19
evm.TU.scaffold0008.640	94.0018	101.939	100.899	104.938	94.9952	79.9604	145.731	161.404	153.366	158.077	124.855	147.252
evm.TU.scaffold0001.165	221.178	227.196	222.392	227.437	184.357	121.324	126.911	88.2374	77.0706	78.2019	86.0594	106.294
evm.TU.scaffold0013.188	52.0932	61.3791	67.3114	62.8827	52.6844	62.5154	275.418	197.91	196.773	233.189	211.242	377.92
evm.TU.scaffold0015.486	67.6756	79.4366	78.8055	90.9973	65.0211	53.9888	220.219	231.451	235.584	229.478	72.6055	204.67
evm.TU.scaffold0013.803	83.2454	92.1309	102.466	87.8523	87.6499	115.612	174.993	207.449	182.508	218.651	174.64	208.575
evm.TU.scaffold0002.705	116.198	132.153	132.675	130.605	136.884	133.15	133.823	175.37	148.254	174.859	87.966	140.869
evm.TU.scaffold0008.481	189.762	195.554	172.27	156.237	120.121	96.9452	0.120264	1.25693	1.04729	4.91338	2.25911	1.15139
evm.TU.scaffold0007.2281	97.5863	91.0422	98.821	82.2789	88.4579	86.3446	251.315	356.342	239.248	319.092	130.706	240.639
evm.TU.scaffold0007.1857	87.7698	110.659	98.9104	116.135	103.446	120.169	71.9507	65.1159	90.8624	63.0512	70.5428	78.4848
evm.TU.scaffold0008.1166	167.592	136.991	144.118	114.907	107.238	94.2899	209.59	268.746	150.939	211.905	261.101	162.653
evm.TU.scaffold0002.1676	130.19	126.936	130.281	141.281	72.5659	52.5781	141.706	115.834	134.792	141.772	128.295	136.539
evm.TU.scaffold0005.1185	75.3584	98.5135	96.2696	120.898	80.6423	85.4272	243.156	317.837	194.663	260.879	104.111	197.773
evm.TU.scaffold0001.1115	130.667	129.147	145.76	99.2726	82.6871	96.7611	95.899	93.4929	117.793	108.367	156.203	108.596
evm.TU.scaffold0001.519	128.023	119.243	115.777	120.687	137.964	162.915	154.617	238.74	204.001	287.433	134.801	184.776
evm.TU.scaffold0015.801	165.324	149.472	145.527	144.893	182.806	237.899	111.098	124.81	123.097	112.792	109.427	119.854
evm.TU.scaffold0002.1382	64.4467	77.5253	81.4385	83.7448	73.7218	83.2294	115.399	134.383	83.3188	108.226	103.734	105.283
evm.TU.scaffold0015.402	178.113	174.768	231.405	147.597	164.478	151.586	3.07966	2.82855	4.39806	5.97171	17.3506	8.08822
evm.TU.scaffold0008.820	186.079	153.838	194.226	145.988	137.514	117.428	144.142	113.141	121.48	121.581	137.16	112.523
evm.TU.scaffold0006.346	108.117	116.864	104.912	83.7448	54.5136	38.7529	148.82	109.918	148.544	122.131	93.6883	143.289
evm.TU.scaffold0005.1897	126.89	116.838	129.98	121.894	149.672	169.586	131.469	148.998	146.567	127.565	90.1917	143.168
evm.TU.scaffold0010.893	197.009	207.221	252.123	168.22	183.339	145.673	39.4045	40.6078	30.7009	39.5152	21.0844	32.3832
evm.TU.scaffold0015.227	125.841	128.637	133.45	118.004	131.299	146.809	214.806	230.507	204.248	237.226	112.991	196.798
gene_5459	141.239	168.556	178.001	131.898	158.752	164.296	98.9409	137.084	120.705	117.589	132.621	125.622
evm.TU.scaffold0001.884	194.802	166.506	182.905	161.033	147.89	85.0295	168.088	118.495	142.155	132.056	196.21	150.131
evm.TU.scaffold0004.1167	120.712	121.368	105.754	115.91	153.253	202.692	75.7245	73.7009	67.3549	55.9641	67.3031	79.5937
evm.TU.scaffold0015.622	143.039	135.591	149.926	128.88	87.9695	41.4387	157.939	192.731	149.352	170.977	145.53	164.07
evm.TU.scaffold0006.1290	41.359	31.1795	75.2044	49.4137	57.151	140.011	60.7532	8.04398	46.9752	189.1	191.506	268.503
evm.TU.scaffold0008.924	75.139	105.485	93.7125	89.3595	88.7065	86.6948	95.0354	45.9213	88.0282	63.4403	85.2784	102.007
evm.TU.scaffold0008.1381	96.8231	101.748	106.069	100.457	98.5042	82.0172	169.77	182.302	161.352	139.832	153.55	134.185
evm.TU.scaffold0010.980	115.962	100.754	98.2178	108.407	133.776	151.991	136.175	197.771	130.37	150.425	121.641	162.489
evm.TU.scaffold0014.689	98.0008	89.6764	111.059	98.9711	86.9757	74.0442	283.023	324.193	212.246	293.491	97.8194	255.05
evm.TU.scaffold0007.1356	357.103	300.83	236.595	307.515	284.798	199.561	15.3686	2.18325	4.73886	8.37277	12.7206	12.7815
evm.TU.scaffold0007.1326	110.332	125.677	135.174	125.707	98.8881	77.7911	192.317	206.229	154.873	222.851	151.918	168.654
evm.TU.scaffold0013.386	107.274	95.4961	81.9661	104.604	129.814	149.958	205.5	276.737	179.723	243.172	113.796	176.351
evm.TU.scaffold0001.2048	92.2935	120.464	97.0738	96.9077	78.4548	57.3395	129.699	125.382	132.13	142.056	93.2953	156.457
evm.TU.scaffold0008.914	100.759	119.213	114.313	113.883	79.0002	65.7984	237.2	169.392	211.872	241.921	161.479	203.598
evm.TU.scaffold0010.272	141.96	142.49	142.991	148.708	175.278	162.915	102.428	164.115	131.496	125.113	106.515	131.198
evm.TU.scaffold0013.129	53.087	47.4166	49.4932	42.5867	48.3078	41.4732	293.273	146.276	280.058	232.458	311.945	203.872
evm.TU.scaffold0005.1833	91.1506	108.757	97.8113	110.368	82.3873	85.6153	163.049	189.244	175.259	204.981	153.703	188.718
evm.TU.scaffold0013.9	55.7132	59.999	60.3271	80.9484	57.626	47.7078	219.012	442.624	273.78	394.099	116.341	250.286
evm.TU.scaffold0005.587	88.4507	93.9007	90.9639	118.524	99.8963	111.873	204.127	299.552	208.087	246.612	116.298	212.992
evm.TU.scaffold0001.1964	120.431	117.557	112.31	137.599	131.479	121.923	169.361	238.383	233.921	189.443	105.421	170.033
evm.TU.scaffold0008.441	252.454	348.602	283.456	203.924	188.076	130.605	0	0	0	0.183089	0	0
evm.TU.scaffold0001.2191	132.538	132.103	108.528	173.871	115.915	111.249	226.994	187.016	179.009	189.353	108.105	202.131
evm.TU.scaffold0005.1952	144.367	146.04	137.59	165.539	133.748	120.65	209.588	226.472	195.545	253.782	91.2069	181.943
evm.TU.scaffold0006.295	162.252	159.519	148.562	163.691	212.605	206.621	91.2692	143.23	107.329	129.864	112.573	124.456
evm.TU.scaffold0002.1422	48.4606	79.8103	54.6801	153.913	65.5082	82.7204	84.6205	56.2394	83.7305	82.7358	88.9014	105.105
evm.TU.scaffold0011.1311	179.234	212.959	221.816	156.446	151.172	147.375	24.2491	13.8983	15.3411	34.2132	84.2881	31.3074
evm.TU.scaffold0005.1974	33.9731	18.3366	28.5308	53.9564	33.6879	46.7103	211.267	401.432	378.645	394.808	184.832	306.951
evm.TU.scaffold0005.1017	137.181	123.512	117.979	163.737	150.841	163.263	118.084	157.718	160.803	140.437	143.426	136.188
evm.TU.scaffold0015.727	68.123	68.1502	64.4676	113.799	64.9072	70.7065	286.786	288.976	157.26	202.004	75.4644	261.1
evm.TU.scaffold0002.1641	97.8964	84.3909	99.532	110.758	104.67	98.2184	145.767	194.271	122.047	131.626	111.755	162.605
evm.TU.scaffold0013.35	78.6024	83.6863	81.0339	73.3417	71.492	63.9394	163.581	91.5257	173.886	147.506	265.775	161.268
evm.TU.scaffold0007.93	98.4635	104.397	117.92	110.663	75.7251	77.6587	157.772	142.866	162.274	117.482	89.2796	119.953
evm.TU.scaffold0011.276	148.952	174.416	174.45	156.699	197.92	213.965	87.4695	72.6459	95.7214	69.9134	103.672	85.5642
evm.TU.scaffold0011.570	95.5658	95.8325	109.248	91.3579	111.307	96.709	203.278	172.456	167.282	187.765	284.06	241.69
evm.TU.scaffold0011.1365	122.471	154.235	109.265	157.546	121.033	137.473	132.37	81.3293	108.999	110.551	137.069	116.561
evm.TU.scaffold0011.1368	79.7512	102.221	94.7331	99.4374	105.793	89.9637	153.651	332.136	158.417	195.305	65.2398	163.084
evm.TU.scaffold0007.1345	127.029	178.438	165.151	182.197	104.081	67.7906	14.202	10.514	19.8043	14.3697	28.3121	31.2093
evm.TU.scaffold0002.2095	101.002	128.517	115.346	103.769	105.813	103.473	163.841	191.451	154.133	142.586	94.6821	166.044
evm.TU.scaffold0008.791	74.8334	82.8966	83.0787	74.3219	97.3608	78.1177	152.594	123.795	132.939	115.976	115.336	153.352
evm.TU.scaffold0001.1610	131.451	147.407	153.373	154.408	137.128	160.53	88.3794	98.502	92.7996	103.613	96.0884	102.741
evm.TU.scaffold0001.11	94.0262	99.2804	97.8083	87.6857	94.2639	79.5029	169.803	235.949	193.108	160.63	136.721	184.604
evm.TU.scaffold0002.2089	99.9247	128.755	103.813	105.43	87.2607	57.2353	177.941	181.718	156.764	185.744	103.656	167.138
evm.TU.scaffold0008.1212	117.33	143.659	121.962	119.131	103.505	88.4651	182.468	147.166	160.691	221.874	181.392	219.993
evm.TU.scaffold0008.1247	45.5507	50.4775	56.859	63.8033	45.8723	44.3814	397.927	455.693	263.499	329.738	90.1463	221.94
evm.TU.scaffold0004.944	200.797	208.392	223.847	178.127	234.91	229.868	8.1518	9.6643	13.3376	15.4513	58.4268	15.8174
evm.TU.scaffold0001.1333	57.3994	66.1006	75.3888	51.7086	38.6847	37.0544	253.705	224.232	247.866	275.292	111.665	229.335
evm.TU.scaffold0011.300	20.4605	32.7525	14.9985	23.1481	52.6275	29.4936	343.408	433.196	368.046	358.161	111.513	388.986
evm.TU.scaffold0011.239	101.477	102.443	100.113	106.663	110.159	105.671	200.427	209.147	149.869	213.825	133.034	207.923
evm.TU.scaffold0013.240	62.0697	56.1855	60.3808	70.0411	81.6389	64.9099	268.442	273.759	289.337	317.329	133.101	299.482
evm.TU.scaffold0002.1770	87.1838	85.9087	87.2625	94.3042	94.2886	80.9475	232.537	204.067	173.602	220.516	168.751	217.632
evm.TU.scaffold0001.404	69.7802	61.952	67.0298	77.788	68.8904	80.5637	262.114	410.694	255.702	264.797	95.2902	247.685
evm.TU.scaffold0002.1485	65.9623	66.3388	79.1243	56.5432	69.7022	75.8969	225.608	197.255	209.364	157.258	129.884	218.286
evm.TU.scaffold0009.804	104.404	109.286	99.6807	122.724	104.861	96.0311	147.891	149.851	154.361	145.592	129.924	166.709
evm.TU.scaffold0015.100	136.257	139.023	147.895	130.015	137.129	116.184	131.467	121.206	109.327	106.035	112.841	114.806
evm.TU.scaffold0005.695	105.312	120.757	118.634	127.169	125.193	150.681	85.6949	66.1822	83.0039	93.1975	113.477	130.562
evm.TU.scaffold0005.609	127.57	123.956	118.082	119.797	121.16	121.095	159.582	245.967	185.178	235.157	145.96	176.568
evm.TU.scaffold0008.923	74.4485	83.5234	86.7126	70.4217	76.6466	56.7187	183.754	173.304	136.686	182.038	98.7484	159.187
evm.TU.scaffold0001.577	107.616	114.574	106.518	114.197	140.34	144.977	137.363	190.488	165.242	165.572	92.1929	131.766
evm.TU.scaffold0015.722	142.514	143.84	144.732	163.008	130.512	94.4588	110.448	176.553	182.639	257.771	115.801	156.168
evm.TU.scaffold0007.1563	44.7181	60.0384	59.8324	46.1623	40.2951	29.2543	189.699	143.982	164.427	153.93	112.669	156.744
evm.TU.scaffold0002.1938	74.8413	80.908	79.5996	86.569	62.1155	57.2359	118.847	130.796	146.427	109.971	81.3139	103.125
evm.TU.scaffold0001.1477	117.129	126.098	108.836	108.085	117.219	146.071	157.323	150.244	152.788	140.316	135.654	182.199
evm.TU.scaffold0010.218	90.0595	91.3189	96.8614	94.5918	104.349	115.028	179.955	185.11	175.867	159.239	103.287	186.619
evm.TU.scaffold0006.971	237.728	232.501	287.002	225.807	363.527	308.232	21.8693	79.4844	15.4486	50.3889	61.3514	23.7384
evm.TU.scaffold0003.955	123.575	120.022	117.165	111.595	128.628	112.349	163.034	132.389	140.692	154.119	149.751	154.449
evm.TU.scaffold0009.5	55.2243	71.0581	65.1799	59.5254	26.3686	14.5502	113.75	104.428	116.204	108.137	85.9055	111.847
evm.TU.scaffold0002.1099	115.495	108.337	108.651	117.171	114.771	111.914	205.195	220.867	173.204	216.136	149.38	173.066
evm.TU.scaffold0007.1465	152.776	200.164	184.539	132.533	159.068	141.517	1.10016	0.894312	2.00377	3.6102	4.23919	1.60148
evm.TU.scaffold0005.1316	98.975	95.2145	98.8713	91.3066	99.8161	78.4728	259.084	184.618	151.419	189.968	263.275	198.065
evm.TU.scaffold0004.1524	111.794	121.198	110.49	139.456	136.035	134.829	126.147	172.129	141.315	129.875	122.31	146.188
evm.TU.scaffold0004.1502	82.6828	82.9497	93.2505	81.6847	71.7797	63.336	231.117	242.032	206.968	232.803	149.016	204.361
evm.TU.scaffold0011.1375	127.471	134.483	121.921	131.198	149.21	119.603	144.426	171.202	124.312	143.84	129.955	173.742
evm.TU.scaffold0007.1419	132.977	152.048	173.634	132.274	152.537	123.75	7.55599	3.8631	8.67949	10.4655	41.9397	11.5375
evm.TU.scaffold0004.464	103.381	110.271	109.991	94.6665	98.1696	70.2578	179.34	221.007	169.649	156.07	90.834	190.422
evm.TU.scaffold0002.514	118	137.194	118.324	98.6711	115	128.419	178.027	106.706	205.255	157.33	198.925	196.087
evm.TU.scaffold0005.41	121.995	127.252	156.61	99.8335	115.87	81.3711	142.238	159.396	111.234	154.846	55.6015	109.315
evm.TU.scaffold0015.94	59.9421	55.5221	59.0468	52.5853	47.5183	55.4476	316.796	308.362	205.123	265.571	103.188	292.882
evm.TU.scaffold0001.941	124.59	81.6995	87.8424	102.677	108.37	121.895	33.4104	32.9923	80.7338	51.9454	290.772	35.9925
evm.TU.scaffold0010.494	154.752	148.431	149.459	162.126	160.253	148.514	123.997	186.002	140.916	152.807	95.3327	132.266
evm.TU.scaffold0008.866	120.035	117.035	102.531	103.519	84.2951	24.2503	83.1834	61.4935	99.0793	79.5604	87.9495	107.003
evm.TU.scaffold0007.94	114.545	129.998	110.989	131.47	112.1	118.826	149.876	167.358	169.888	154.115	134.031	157.93
evm.TU.scaffold0007.1151	49.4942	72.0483	66.0359	58.1496	22.6976	19.4895	214.686	112.356	161.524	187.29	126.64	216.357
evm.TU.scaffold0007.1205	67.6775	71.3521	72.1554	87.6894	89.6818	83.3054	250.658	286.79	213.954	232.551	129.438	208.014
evm.TU.scaffold0007.1952	118.121	123.54	122.095	126.313	134.312	141.706	94.7227	67.8202	76.9342	75.0905	90.7383	91.353
evm.TU.scaffold0005.583	90.112	82.5231	83.245	71.6394	64.9072	49.2537	143.123	250.66	158.56	198.532	124.942	159.557
gene_12176	106.417	89.7365	73.8658	67.6879	68.4476	92.1511	128.292	118.746	132.406	123.502	98.0474	176.999
evm.TU.scaffold0015.694	100.768	117.789	113.794	107.59	83.4133	106.305	122.98	130.586	116.599	145.895	115.156	110.24
evm.TU.scaffold0015.759	149.503	157.41	145.401	122.376	95.424	61.2082	162.362	121.209	149.8	171.144	143.043	152.167
evm.TU.scaffold0010.505	137.82	144.361	151.997	136.806	153.148	121.436	87.2737	97.3454	81.2412	80.7259	86.5484	87.1556
evm.TU.scaffold0011.460	123.399	129.733	129.037	111.449	88.7424	77.5808	134.399	92.4778	116.995	117.367	107.717	111.383
evm.TU.scaffold0008.320	91.8828	97.0121	86.6802	111.102	100.967	108.194	159.847	134.867	139.434	147.034	102.9	141.098
evm.TU.scaffold0007.2025	65.9957	60.6196	64.491	64.0869	66.1989	58.1524	123.838	137.688	107.364	101.765	131.524	139.814
evm.TU.scaffold0006.553	98.0737	90.5384	106.505	84.9433	96.7222	90.3204	156.781	153.929	120.253	116.974	108.718	139.695
evm.TU.scaffold0006.688	103.338	105.074	105.969	105.704	104.591	135.753	143.139	119.243	97.4516	144.005	97.0505	132.913
evm.TU.scaffold0012.155	90.0894	83.1063	90.9332	147.92	116.455	115.067	284.486	292.764	165.959	178.223	96.4559	167.476
evm.TU.scaffold0007.11	101.124	83.5797	91.0188	89.6992	81.1038	67.7382	220.224	240.353	183.448	222.386	135.498	189.102
evm.TU.scaffold0002.590	46.2854	33.6476	26.6813	56.6859	56.2399	72.3857	188.22	502.45	225.775	312.376	106.598	254.968
evm.TU.scaffold0014.704	86.7902	84.1425	90.594	133.396	105.357	120.021	66.2248	22.8744	30.5412	34.7338	65.7945	111.994
evm.TU.scaffold0005.175	108.9	113.596	116.489	109.705	125.326	128.251	143.714	162.61	122.544	141.58	132.821	142.008
evm.TU.scaffold0002.1888	109.07	98.9999	111.018	91.6708	103.437	94.7865	225.774	197.82	165.167	188.907	136.748	186.314
evm.TU.scaffold0011.339	90.9006	66.5957	87.2948	69.16	71.3493	52.8602	119.361	96.3144	86.7693	71.1372	91.873	91.6915
evm.TU.scaffold0001.2339	110.868	103.957	101.896	97.566	101.064	136.306	96.5469	116.247	95.422	76.7253	68.6806	100.644
evm.TU.scaffold0008.572	113.79	113.391	112.08	122.606	130.928	139.498	152.12	145.251	105.028	150.251	129.402	134.32
evm.TU.scaffold0003.1275	103.847	106.657	105.146	129.663	132.853	126.742	126.31	177.709	173.473	161.425	135.61	175.866
evm.TU.scaffold0008.243	115.37	116.894	104.266	137.999	119.338	162.605	156.223	167	147.416	168.365	164.22	169.867
evm.TU.scaffold0001.2032	105.421	104.439	122.507	108.031	85.2448	76.6309	137.476	142.594	122.172	104.452	100.328	119.784
evm.TU.scaffold0007.505	103.366	112.752	115.436	97.5612	111.25	85.1754	160.241	186.289	160.545	170.408	117.204	178.657
evm.TU.scaffold0007.1358	77.0351	79.1244	84.1045	74.5288	74.6302	66.271	93.607	92.7653	79.9176	71.3972	94.4379	96.46
evm.TU.scaffold0005.1923	65.6344	82.9497	70.369	67.5108	81.134	63.4787	112.955	82.0381	104.151	85.7556	57.3564	87.5942
evm.TU.scaffold0007.846	168.252	171.031	129.939	166.553	157.953	138.081	127.767	136.807	100.87	142.169	123.011	111.985
evm.TU.scaffold0006.964	70.6193	95.6097	93.3634	43.3678	40.0519	42.005	149.713	101.561	130.994	152.116	134.815	153.69
evm.TU.scaffold0010.1263	76.4433	73.6491	79.3702	64.0069	69.7152	65.7153	204.52	203.507	150.336	133.304	76.8714	139.945
evm.TU.scaffold0011.988	79.0517	76.8306	89.059	87.7919	87.669	55.983	86.145	118.36	94.2061	78.8983	104.523	95.1067
evm.TU.scaffold0007.1109	119.043	134.645	128.436	130.413	92.2348	83.8576	163.196	137.012	138.914	157.369	148.027	157.854
evm.TU.scaffold0014.564	53.1129	57.2591	56.5549	33.8955	46.9923	38.924	83.4182	53.5586	72.8896	58.9383	76.6835	82.3959
evm.TU.scaffold0005.266	115.979	115.813	117.081	101.928	107.821	132.675	95.9714	91.8707	100.748	103.271	96.3891	101.381
evm.TU.scaffold0008.494	55.3881	75.0179	63.8122	124.747	83.6372	77.8122	135.407	216.54	229.983	286.795	103.742	337.663
evm.TU.scaffold0007.1370	218.307	243.824	291.697	234.536	268.099	195.947	0.491266	0	0	0	0	0
evm.TU.scaffold0005.1061	134.459	127.244	127.837	136.57	127.454	117.228	123.321	111.757	94.212	103.986	132.079	127.441
evm.TU.scaffold0013.684	325.006	286.391	415.774	157.109	178.906	237.523	0.0534642	0.167634	0	0	0.618034	0
evm.TU.scaffold0013.64	102.78	120.205	101.759	151.248	118.516	131.76	156.801	143.017	128.436	179.047	120.393	186.69
evm.TU.scaffold0011.911	57.5227	92.7125	66.3595	56.3572	59.5685	168.807	45.9876	62.9071	52.3111	60.9186	53.7469	64.0657
evm.TU.scaffold0006.697	87.568	91.4129	100.219	75.9957	73.407	77.37	117.167	88.765	119.721	123.127	115.108	127.138
evm.TU.scaffold0010.13	85.4283	96.8855	100.695	128.407	77.4932	84.599	95.8201	84.077	90.48	107.89	69.7356	94.9056
evm.TU.scaffold0007.903	43.5562	44.2447	44.9225	53.5991	48.6804	30.704	253.652	100.731	260.083	113.899	439.945	284.193
evm.TU.scaffold0001.1403	131.906	144.055	132.971	154.672	142.618	133.837	130.35	190.79	124.85	180.319	113.662	133.98
evm.TU.scaffold0014.624	138.11	135.479	143.907	122.975	100.579	83.7737	112.325	110.987	113.535	118.524	121.575	115.693
evm.TU.scaffold0005.861	85.7835	95.7491	90.8842	77.4472	95.8592	87.4522	122.072	77.0125	96.6504	102.094	77.4483	108.229
evm.TU.scaffold0004.346	152.706	138.203	139.635	115.902	107.452	99.6253	150.102	140.836	107.099	239.682	114.927	226.072
evm.TU.scaffold0001.2277	150.266	116.937	137.695	91.2637	164.788	145.652	156.33	191.162	94.0507	191.318	165.489	197.42
evm.TU.scaffold0013.550	79.6012	79.4353	73.2699	81.0991	86.543	107.091	196.171	148.351	137.097	165.732	196.327	146.831
evm.TU.scaffold0012.421	134.182	147.678	128.546	173.944	186.936	216.071	65.4981	83.8978	84.5484	81.2433	95.641	98.4215
evm.TU.scaffold0013.198	100.088	117.758	112.889	125.854	117.668	100.637	166.521	193.874	210.764	183.638	97.5274	177.735
evm.TU.scaffold0006.450	104.9	113.269	129.009	91.9783	90.9235	71.8527	120.542	320.437	172.961	234.553	172.848	141.824
gene_4062	123.348	105.271	102.671	88.1858	109.982	114.515	111.019	185.575	97.8091	87.5775	113.217	95.8477
evm.TU.scaffold0013.469	141.288	145.086	120.064	229.007	154.46	151.512	181.222	114.372	168.382	148.389	67.9574	163.142
evm.TU.scaffold0010.1138	154.083	148.255	149.125	130.361	169.021	199.166	79.4702	92.5457	89.5485	88.3489	85.0376	88.4699
evm.TU.scaffold0008.1244	42.7751	41.2342	29.3927	60.6062	70.0843	54.9096	352.617	330.342	283.424	167.435	58.405	316.75
evm.TU.scaffold0010.1292	59.6733	81.0765	72.313	62.6301	39.8909	37.3227	89.5025	67.1812	81.0676	83.3054	90.7259	104.754
evm.TU.scaffold0007.1253	54.5795	54.3653	57.9984	70.4548	60.1097	61.8382	246.956	249.232	195.715	232.698	155.78	230.624
evm.TU.scaffold0001.900	48.1209	42.5117	38.8441	28.7509	48.9562	55.2526	287.021	65.5237	251.479	158.62	243.245	486.823
evm.TU.scaffold0005.1405	101.125	104.645	101.447	90.695	93.3362	95.5295	99.202	130.032	107.545	93.1965	78.8194	103.713
evm.TU.scaffold0005.762	122.011	136.969	129.3	133.582	127.496	136.739	127.232	144.296	128.388	161.01	138.161	157.824
evm.TU.scaffold0015.270	52.7291	58.8921	57.9118	42.0134	54.8907	47.9018	151.562	320.168	308.576	372.461	126.803	253.812
evm.TU.scaffold0005.746	101.05	117.191	131.683	119.583	103.833	74.657	26.6056	9.98192	15.9585	11.4171	24.7533	17.4167
evm.TU.scaffold0007.1131	19.8254	22.1687	19.2712	49.182	53.8902	38.2351	160.056	263.445	152.687	311.206	353.609	288.958
evm.TU.scaffold0005.1005	125.891	143.565	135.789	129.933	151.791	194.957	92.6674	118.707	147.449	224.738	133.309	108.058
evm.TU.scaffold0005.1744	117.018	97.0784	117.354	110.127	59.3376	70.8301	235.107	182.944	158.599	91.3631	80.2124	172.896
evm.TU.scaffold0002.57	61.1966	77.5194	71.2311	74.5201	71.9349	66.9096	112.891	111.035	106.506	116.936	57.5785	121.143
evm.TU.scaffold0009.849	75.026	64.5141	74.2161	63.5851	86.8891	90.1141	164.971	105.367	134.55	89.611	144.773	199.317
evm.TU.scaffold0010.452	97.7204	98.9327	104.085	106.678	107.59	89.9782	152.098	177.219	135.555	161.789	127.893	160.621
evm.TU.scaffold0003.801	85.0755	89.8005	86.405	90.3983	96.7245	94.9633	185.542	275.556	168.121	263.863	125.831	197.79
evm.TU.scaffold0002.1919	81.1555	89.8228	89.8796	88.2738	71.1453	67.1751	121.443	116.001	115.365	111.791	69.8448	107.353
evm.TU.scaffold0002.2107	170.418	157.907	185.582	138.633	146.022	119.948	112.081	105.778	100.391	97.6605	126.758	98.2342
evm.TU.scaffold0005.1109	155.1	165.673	151.853	154.01	109.479	105.35	51.0782	45.057	31.0482	37.118	111.292	45.1667
evm.TU.scaffold0002.898	83.764	79.0269	84.8822	52.074	56.8299	54.3206	142.683	126.267	160.051	139.782	85.2784	128.4
evm.TU.scaffold0009.118	157.487	153.893	153.863	136.683	154.274	154.783	74.4246	41.5414	74.5961	68.958	74.6353	84.5243
evm.TU.scaffold0002.1607	85.3709	77.6737	82.3904	83.7448	68.841	56.7065	206.456	199.147	154.393	175.284	122.876	185.401
evm.TU.scaffold0001.2081	35.6781	24.1291	33.3468	36.5556	26.3392	31.6308	280.465	150.557	287.773	241.418	357.826	202.858
evm.TU.scaffold0010.1248	114.782	118.497	117.093	120.186	71.3716	45.3954	173.369	140.045	132.237	152.388	96.9629	123.839
evm.TU.scaffold0005.2168	129.365	110.185	105.925	120.064	119.154	119.802	252.021	204.534	186.511	204.894	109.445	116.828
evm.TU.scaffold0002.527	102.148	102.823	98.0435	119.388	122.275	158.974	119.271	180.868	128.93	166.87	106.788	155.185
evm.TU.scaffold0007.2193	85.7296	90.932	89.9148	79.5757	72.806	69.6715	120.473	106.907	105.007	107.412	103.911	109.124
evm.TU.scaffold0007.1149	67.1814	59.6955	65.5025	64.0037	70.6935	56.866	219.196	300.921	185.072	140.978	122.201	201.476
evm.TU.scaffold0008.955	80.3769	101.562	109.173	88.6374	73.4177	52.2624	47.3139	32.6401	47.7346	59.7143	89.9057	70.4328
evm.TU.scaffold0011.359	88.0062	85.3708	91.4369	85.7046	99.4316	92.1991	217.191	260.361	176.91	212.25	100.079	191.428
evm.TU.scaffold0005.922	88.4277	55.5628	112.719	62.9575	58.3224	59.4659	114.11	110.27	105.077	69.0961	109.488	86.705
evm.TU.scaffold0015.758	143.658	194.944	148.063	165.727	132.138	153.28	131.754	69.2954	57.8802	133.091	185.147	90.1251
evm.TU.scaffold0002.1816	100.417	107.334	104.377	98.8512	77.1164	49.9009	171.394	116.421	151.159	140.81	132.322	151.033
evm.TU.scaffold0007.2405	108.93	106.208	106.179	112.77	100.234	79.1923	134.661	109.701	119.622	105.333	113.456	141.243
evm.TU.scaffold0015.478	57.2421	59.5002	60.4254	37.5292	39.5543	36.963	222.749	104.655	140.544	140.922	122.979	192.925
evm.TU.scaffold0004.577	321.661	222.731	198.856	192.837	296.948	220.53	0.0428947	0.0896627	210.018	0	0.0826422	0
evm.TU.scaffold0009.1424	326.382	235.444	229.158	204.903	279.719	226.221	3.71958	6.60878	5.33504	5.12649	11.8243	4.87308
evm.TU.scaffold0010.1311	156.325	154.804	181.492	123.047	152.249	110.991	109.208	86.893	91.4766	126.649	86.8457	114.093
evm.TU.scaffold0003.158	89.988	89.1207	87.3285	96.1304	99.4598	85.057	163.218	195.85	175.738	174.683	146.598	172.869
evm.TU.scaffold0012.632	73.746	93.0958	88.4811	81.1586	70.1923	71.9178	181.465	161.718	138.467	135.695	81.1811	150.628
evm.TU.scaffold0010.1355	112.059	97.1735	98.8235	103.529	89.8715	69.4526	181.244	190.124	228.925	230.092	95.2385	206.992
evm.TU.scaffold0002.1332	107.279	104.965	101.798	122.128	100.005	105.623	95.6863	119.584	119.001	108.724	76.8481	132.292
evm.TU.scaffold0008.394	121.465	135.349	107.449	84.9683	113.974	58.8936	6.04432	1.45782	758.814	2.89891	12.9888	2.81139
evm.TU.scaffold0001.663	77.9697	97.3628	80.6954	76.291	58.677	50.9129	124.733	107.141	115.779	105.616	85.4886	125.566
evm.TU.scaffold0009.1497	61.7598	70.7326	67.2264	50.8698	71.6684	65.7238	78.1113	71.2785	69.113	67.8677	56.7193	66.0465
evm.TU.scaffold0008.498	102.445	108.209	113.337	96.8948	113.205	105.33	109.724	119.131	100.557	82.0238	80.7688	91.6003
evm.TU.scaffold0010.58	75.4643	53.3701	58.4242	87.0207	78.0198	46.296	345.583	329.3	298.008	233.54	67.8478	242.571
evm.TU.scaffold0007.1559	53.1183	65.4501	71.0923	77.8734	65.8653	56.6437	213.533	186.422	233.531	338.518	101.346	247.002
evm.TU.scaffold0004.1293	52.6811	63.1534	62.4238	50.4796	41.6178	25.1771	151.579	80.7712	145.949	140.244	112.469	152.926
evm.TU.scaffold0010.1009	117.924	111.853	108.106	115.05	133.245	155.772	94.9674	119.766	103.914	92.535	86.57	98.6925
evm.TU.scaffold0009.92	104.454	97.8043	95.6321	103.666	109.14	107.644	116.588	152.693	138.415	118.052	89.5981	116.475
evm.TU.scaffold0007.1638	84.3159	100.586	100.307	92.3176	63.68	38.668	156.77	99.0745	137.411	87.7749	136.738	118.299
evm.TU.scaffold0011.371	115.576	121.112	115.793	129.051	105.845	92.4839	94.7886	47.5776	103.824	78.4051	134.836	119.708
evm.TU.scaffold0009.241	81.6046	85.0739	82.6019	77.7177	79.0305	83.5288	143.927	130.016	166.72	185.835	107.643	190.238
evm.TU.scaffold0010.493	72.3727	79.3966	73.8362	83.4822	94.6564	86.7575	99.8837	72.1369	71.4022	68.6109	110.923	112.876
evm.TU.scaffold0002.907	145.925	148.171	164.203	136.86	151.199	123.413	125.24	145.872	104.943	135.415	93.4252	115.943
evm.TU.scaffold0005.721	87.3572	81.8858	79.7021	78.4042	74.9178	46.3289	95.2102	102.352	89.5809	58.1512	92.8404	124.932
evm.TU.scaffold0010.1354	93.546	120.672	109.09	109.948	131.072	106.306	92.3408	78.79	91.5021	112.663	106.161	115.333
evm.TU.scaffold0005.1387	85.9663	84.0454	101.252	89.7097	76.6173	79.3759	179.575	196.099	153.039	176.52	108.473	152.839
evm.TU.scaffold0009.1462	99.8368	95.9171	91.5793	74.9953	86.1124	82.1614	93.7853	87.3241	102.189	81.1056	166.339	127.935
evm.TU.scaffold0003.25	128.369	115.447	113.605	111.789	135.413	132.176	106.81	125.109	186.471	105.314	86.4644	120.216
evm.TU.scaffold0001.26	87.339	86.1094	84.8973	70.2468	76.2514	80.4847	130.608	110.174	101.51	123.313	117.41	115.029
evm.TU.scaffold0009.15	112.252	109.927	104.992	113.264	105.231	107.64	129.476	133.765	178.731	127.743	74.6306	121.832
evm.TU.scaffold0001.1143	42.7009	45.8243	57.1711	41.1951	26.1487	16.9603	50.7963	99.3344	23.7295	65.8895	34.93	26.8836
evm.TU.scaffold0007.1758	108.778	110.168	109.143	116.249	102.715	119.196	142.586	117.706	114.025	116.736	127.237	135.246
evm.TU.scaffold0006.524	117.758	105.262	131.947	133.022	112.658	112.158	100.08	68.9883	115.558	102.229	162.64	106.496
evm.TU.scaffold0006.875	26.0357	9.18581	25.5425	4.0532	10.4827	5.87472	353.664	640.455	232.488	245.349	27.8374	284.276
evm.TU.scaffold0005.727	109.817	87.02	99.0596	76.8587	99.0625	74.522	101.515	79.9562	127.531	92.4496	157.255	114.541
evm.TU.scaffold0011.1196	143.69	150.909	165.753	100.408	72.4593	43.9251	169.732	165.33	135.389	137.835	99.3811	104.216
evm.TU.scaffold0010.481	118.503	117.423	104.707	128.31	129.902	177.047	106.371	92.9212	107.894	121.077	134.79	115.305
evm.TU.scaffold0007.1657	129.871	132.94	115.624	121.857	117.413	138.33	187.578	66.1234	66.5254	102.764	95.51	102.159
evm.TU.scaffold0001.1554	130.574	116.036	128.101	114.141	127.76	107.945	104.309	163.041	116.207	110.747	104.441	96.1582
evm.TU.scaffold0002.11	117.287	148.705	132.098	148.24	119.778	134.529	47.0252	51.6316	55.8861	44.8324	62.9432	68.4427
evm.TU.scaffold0002.852	113.904	97.4816	95.1879	73.3632	71.245	133.009	27.3521	38.7574	39.8781	35.2122	200.402	42.9377
evm.TU.scaffold0002.1211	65.8108	58.2795	66.9803	66.2519	68.4581	57.7564	175.104	321.878	201.388	258.477	94.6794	207.914
evm.TU.scaffold0006.879	223.082	145.912	186.647	137.313	195.246	129.296	144.181	97.2538	248.021	91.4823	109.012	65.758
evm.TU.scaffold0012.582	155.733	143.579	151.396	141.436	152.603	133.377	104.522	104.111	98.4468	88.6105	104.388	92.0002
gene_7386	49.5905	71.915	57.8795	68.8357	54.9908	46.4797	204.68	153.071	258.972	238.168	64.0982	396.511
evm.TU.scaffold0006.1144	86.3975	94.4641	102.277	107.257	98.6159	86.1488	65.5962	72.1661	62.193	65.1432	66.5155	67.7013
evm.TU.scaffold0001.2249	90.7023	80.2865	83.9566	78.5303	101.461	101.763	119.247	112.578	120.465	109.669	80.8576	112.627
evm.TU.scaffold0002.1573	51.9819	66.5141	58.2203	49.4141	38.3411	27.631	126.276	96.3021	117.714	131.529	70.2024	123.108
gene_15794	101.252	90.4233	76.6942	95.8072	77.8325	71.1762	59.1752	67.148	56.4683	61.5844	185.02	71.9035
evm.TU.scaffold0006.1047	120.918	106.284	96.776	111.248	116.41	152.273	159.903	212.667	139.754	204.791	115.561	130.237
evm.TU.scaffold0010.960	142.821	154.94	105.544	159.42	212.117	263.164	50.0954	68.1404	42.6803	100.377	192.127	72.5265
evm.TU.scaffold0005.487	79.0937	91.0898	81.9777	79.3811	60.6856	50.275	171.781	171.904	171.112	212.874	83.8102	141.118
evm.TU.scaffold0008.280	75.1865	116.963	83.3739	107.047	71.5799	104.82	40.8807	56.2055	58.9597	80.1313	32.2314	64.9861
evm.TU.scaffold0006.199	76.1461	128.369	101.065	123.631	121.505	136.803	2.07542	1.18316	1.83634	1.85742	2.45366	0.570428
evm.TU.scaffold0008.686	127.598	123.842	133.74	125.59	121.91	112.505	92.8676	81.3192	93.0821	110.334	101.444	89.9646
evm.TU.scaffold0015.795	61.1091	59.4124	63.8888	81.3986	75.3417	68.5286	129.824	178.706	120.182	152.57	143.728	140.295
evm.TU.scaffold0002.2078	54.7618	57.4737	62.1592	55.4673	34.4569	28.9977	108.281	85.0935	86.0946	68.8956	81.7484	90.1035
evm.TU.scaffold0002.1482	103.784	96.3228	108.023	90.5704	103.868	103.939	101.787	111.874	100.058	83.4773	86.3932	97.7202
evm.TU.scaffold0013.111	65.7452	63.5084	62.1567	79.8262	62.2027	56.1679	157.754	206.429	155.475	161.459	93.6268	171.008
evm.TU.scaffold0011.1045	0.160271	0	0	0	0	0	1464.36	11.1938	108.782	1.99969	294.045	503.02
evm.TU.scaffold0010.442	113.851	127.232	107.267	113.701	125.464	161.251	87.9459	71.5071	84.8097	70.0713	91.7398	94.3345
evm.TU.scaffold0009.726	106.09	111.751	114.111	107.906	85.377	78.4141	105.396	93.3703	120.597	89.7902	101.229	121.457
evm.TU.scaffold0009.912	111.026	122.941	125.344	140.347	127.62	152.179	90.1864	94.6526	104.381	109.959	112.687	92.7896
evm.TU.scaffold0006.513	159.134	202.455	193.296	174.585	205.483	109.571	0	0	0	0.536805	0	1.09904
evm.TU.scaffold0006.1126	85.1778	92.8421	79.6487	96.8238	82.2898	73.1654	93.4665	149.321	133.376	126.848	72.8876	134.787
evm.TU.scaffold0007.2390	95.2719	102.907	105.837	107.19	121.148	112.226	120.052	148.974	113.673	115.928	88.998	118.079
evm.TU.scaffold0014.70	111.549	100.616	112.56	97.1285	92.1821	85.392	159.269	178.474	134.227	145.614	139.485	138.386
evm.TU.scaffold0010.1004	52.173	51.6087	44.2719	51.3505	49.6606	57.6148	240.799	129.671	257.622	212.973	283.139	240.031
evm.TU.scaffold0003.442	49.9518	47.1977	47.8336	56.0717	44.361	53.2111	237.518	364.679	221.75	238.575	69.7421	181.979
evm.TU.scaffold0002.1799	91.3344	75.7049	86.8528	88.5762	82.3129	67.2324	176.418	133.795	94.9022	144.265	99.3629	138.431
evm.TU.scaffold0007.2012	84.2983	91.8151	83.6654	95.2281	95.9925	97.6378	87.4324	98.3941	93.4587	96.8404	92.1266	98.1327
evm.TU.scaffold0007.1998	107.341	96.5667	89.8538	70.3371	82.8836	80.8942	225.044	126.539	156.857	127.355	277.542	184.261
evm.TU.scaffold0014.612	55.6911	66.2499	62.966	66.6603	65.3473	69.4627	164.784	152.852	154.354	134.244	72.9501	156.638
evm.TU.scaffold0001.163	128.241	128.957	121.622	119.288	139.194	150.015	78.5372	81.9161	71.1339	73.2804	85.7606	76.841
gene_11098	182.685	225.7	214.816	207.409	327.797	259.724	0	0	0	0.0742969	0	0
evm.TU.scaffold0015.62	86.3198	91.1445	100.993	68.784	65.5362	52.4483	136.014	87.9664	110.423	110.205	134.378	128.224
evm.TU.scaffold0010.343	64.7106	62.0049	62.7254	64.4342	67.9108	62.9937	198.372	284.612	181.517	243.418	130.957	165.588
evm.TU.scaffold0002.1073	58.6918	66.2554	67.4831	70.9789	69.7208	62.1875	220.492	162.893	148.619	168.682	103.793	188.963
evm.TU.scaffold0007.961	68.765	66.5061	68.9265	68.8687	73.6677	85.5455	95.9219	113.442	125.112	98.1266	59.7811	101.9
evm.TU.scaffold0014.188	89.8348	88.0661	90.0348	95.1645	87.9453	123.871	131.793	177.218	86.7767	125.393	113.178	106.902
evm.TU.scaffold0002.1615	122.514	128.896	122.806	114.85	66.6072	64.9561	105.264	71.336	96.2213	100.333	96.9236	103.459
evm.TU.scaffold0014.752	93.9676	104.441	91.4556	97.2936	106.345	88.2327	148.867	138.062	128.855	157.56	133.062	153.732
evm.TU.scaffold0014.602	90.8925	79.7971	100.59	91.9752	97.1748	69.8313	127.627	124.162	102.965	109.331	98.5404	120.496
evm.TU.scaffold0015.9	134.667	166.825	153	115.829	113.698	40.0872	24.443	11.3849	281.995	19.6167	22.0106	22.4912
evm.TU.scaffold0007.689	90.1816	85.663	72.5118	82.8198	75.5229	61.3056	107.555	83.1638	123.404	117.861	104.195	137.084
evm.TU.scaffold0005.1306	91.204	89.151	82.7988	92.4121	85.6553	87.9228	161.43	125.597	122.569	91.8824	114.09	139.138
evm.TU.scaffold0008.351	66.524	78.5774	58.0302	75.3061	80.6344	87.4569	115.651	129.943	128.127	120.339	81.7932	110.755
evm.TU.scaffold0005.1023	114.27	115.364	132.167	95.8827	110.118	100.89	118.395	159.938	105.443	110.389	82.3443	100.379
evm.TU.scaffold0009.830	91.6106	93.2137	107.591	100.316	88.875	105.932	150.454	129.871	141.283	121.792	126.986	135.676
evm.TU.scaffold0010.227	77.3474	78.3191	72.7235	96.0296	95.7873	85.6476	141.665	130.002	93.8482	171.038	73.6496	123.804
evm.TU.scaffold0009.540	66.7148	71.5901	62.3237	72.5719	69.9285	82.7655	181.815	191.603	187.819	180.652	196.889	193.529
evm.TU.scaffold0010.1132	85.7493	79.381	77.7411	63.1997	69.9457	78.3982	148.376	119.288	139.04	130.269	87.2713	135.332
evm.TU.scaffold0011.320	104.874	102.916	88.1723	129.701	140.085	173.858	104.272	112.941	99.3567	93.2015	81.3574	110.73
evm.TU.scaffold0011.593	97.8413	100.197	94.6455	96.3341	79.7742	64.6223	130.913	171.789	141.721	159.236	118.403	144.392
evm.TU.scaffold0011.1137	97.6733	102.516	104.006	125.474	101.661	124.803	78.8739	69.5687	95.0932	61.5607	92.3517	86.6239
evm.TU.scaffold0014.100	174.174	180.354	192.47	170.041	195.197	148.5	8.226	7.92456	13.9239	19.1187	72.3516	13.9849
evm.TU.scaffold0015.671	60.3901	68.257	69.0618	72.3088	57.9101	23.8375	207.078	194.889	166.748	178.445	111.214	152.972
evm.TU.scaffold0006.566	65.2932	61.8116	73.8542	72.3541	50.8688	44.3355	210.284	147.281	161.273	190.091	166.479	191.59
evm.TU.scaffold0004.1380	97.895	98.2142	99.6197	90.4333	85.4918	86.496	143.889	158.979	160.591	186.276	146.836	167.105
evm.TU.scaffold0004.1442	77.7719	73.0016	68.2766	82.2221	66.0502	77.4179	120.164	83.3836	100.56	186.488	278.74	227.048
gene_5346	109.514	98.8684	126.722	103.07	92.6453	87.6741	52.0742	67.6827	46.5106	34.8338	81.6769	57.8619
evm.TU.scaffold0005.1101	123.424	147.608	158.584	122.642	122.354	112.889	52.2238	46.9705	49.0067	50.4301	60.4464	52.4291
evm.TU.scaffold0001.549	65.1087	77.7494	74.4962	65.0551	96.2081	96.5042	58.37	68.5892	68.3279	85.1963	87.0671	100.335
evm.TU.scaffold0005.792	47.0287	57.168	64.7106	50.823	45.0257	53.0885	171.235	110.812	132.895	181.967	108.01	137.108
evm.TU.scaffold0009.910	147.453	173.404	185.54	142.747	147.231	120.281	18.7467	12.1096	45.2145	21.7876	58.9425	30.3068
evm.TU.scaffold0005.997	84.0089	97.6807	91.2781	109.764	100.717	127.808	122.424	105.832	160.652	92.2679	176.79	129.107
evm.TU.scaffold0010.542	99.8525	103.449	118.181	123.168	104.321	87.1005	146.332	214.818	142.957	157.106	78.0974	117.095
evm.TU.scaffold0002.1075	99.7365	119.918	113.033	110.788	121.469	117.664	117.459	96.772	82.7389	90.4754	49.9319	107.801
evm.TU.scaffold0015.85	73.7376	69.3913	74.1785	65.0332	74.8821	71.3336	109.812	75.895	82.1908	64.7469	78.5845	86.8125
evm.TU.scaffold0011.1385	128.056	119.307	140.695	96.7717	135.904	139.754	81.1971	68.5355	82.7919	89.8084	133.213	98.739
evm.TU.scaffold0015.400	114.837	120.968	115.93	119.422	99.9769	78.5361	118.698	108.317	104.609	104.038	134.836	116.707
evm.TU.scaffold0012.790	115.445	155.298	116.457	131.387	151.777	141.588	101.399	119.153	116.156	154.606	126.923	99.4971
evm.TU.scaffold0008.405	98.4305	102.044	117.186	95.9513	103.707	83.4987	128.682	135.962	114.5	132.124	89.7717	121.328
evm.TU.scaffold0011.133	94.9292	86.414	99.5686	87.3674	85.9799	68.8744	131.541	119.675	112.254	100.719	96.1317	120.664
evm.TU.scaffold0007.1665	126.295	118.282	123.171	103.023	110.738	107.04	89.45	64.8129	82.2485	65.7348	74.032	92.121
evm.TU.scaffold0005.1934	94.8717	94.4861	108.857	68.93	90.4413	88.6993	131.358	117.921	138.423	149.176	131.736	151.765
evm.TU.scaffold0009.1527	0.267118	0.0520887	0.247533	0.215976	0.30689	0.630622	1181.95	10.6149	51.5847	5.87789	330.986	695.321
evm.TU.scaffold0009.1159	113.124	99.8333	108.475	114.4	92.7337	64.9536	160.984	117.44	153.363	150.997	217.45	143.041
gene_1882	212.913	246.174	236.578	161.161	276.225	223.706	0	0	0	0.823532	0	0
evm.TU.scaffold0009.6	84.452	91.8253	89.9722	95.7728	99.201	111.501	93.4114	153.176	108.901	105.172	78.6072	109.152
evm.TU.scaffold0011.726	60.5652	59.5083	58.8237	59.8452	63.7121	57.5421	199.278	212.565	234.858	271.161	208.795	173.26
evm.TU.scaffold0001.548	58.1981	43.0861	69.0634	53.7354	42.901	129.805	26.5721	38.3027	47.9606	156.604	314.297	147.643
evm.TU.scaffold0002.2074	90.3928	76.606	75.9896	85.6721	76.4098	66.5092	123.154	123.777	82.7269	91.0654	73.1291	84.6977
evm.TU.scaffold0003.708	105.76	126.619	91.3042	127.901	122.314	159.729	75.8547	75.6511	72.2009	87.3211	95.4784	97.4367
evm.TU.scaffold0008.911	91.5821	97.4113	91.1499	99.1714	57.1639	38.9281	152.385	123.173	127.901	147.319	114.849	154.676
evm.TU.scaffold0007.163	83.8016	94.1525	100.15	100.24	88.6464	104.636	123.435	65.6379	133.5	96.4776	143.989	101.557
evm.TU.scaffold0001.867	63.7964	78.1342	77.8051	58.5042	16.8093	7.64817	95.5361	64.0543	85.1555	113.571	110.167	105.362
evm.TU.scaffold0001.1903	119.763	117.512	122.656	114.489	133.433	131.616	107.505	125.823	100.814	118.457	123.895	112.364
evm.TU.scaffold0009.563	75.2802	83.7274	80.8859	68.8039	68.1526	72.1446	152.968	169.739	143.546	163.887	76.1863	132.674
evm.TU.scaffold0005.456	109.671	87.7164	105.302	114.252	131.353	144.295	116.612	136.063	155.563	150.636	103.656	129.768
evm.TU.scaffold0002.789	60.5394	73.5224	56.762	49.5256	79.5967	63.4337	188.426	52.4201	130.568	87.0154	342.566	221.104
evm.TU.scaffold0006.994	125.395	127.291	124.738	126.114	141.691	162.635	80.6584	76.0179	75.8214	92.7783	83.5609	81.999
evm.TU.scaffold0015.92	61.3567	50.0878	74.0252	61.2151	45.6615	37.6443	181.654	150.619	128.878	138.445	114.91	128.605
evm.TU.scaffold0008.905	65.3733	67.9367	65.5663	80.346	62.5891	64.9561	147.544	98.4838	132.741	103.14	97.4909	119.797
evm.TU.scaffold0013.496	79.558	89.6432	73.1512	88.2292	63.7217	62.785	102.722	121.152	126.433	152.039	66.9996	142.701
evm.TU.scaffold0009.215	71.9794	60.2716	60.3864	79.7569	69.8296	80.4494	128.946	121.233	106.701	125.585	114.66	137.168
evm.TU.scaffold0006.563	62.0442	65.9971	64.869	73.3222	68.0155	64.2803	144.047	169.74	112.236	129.943	95.3348	141.645
evm.TU.scaffold0001.2448	48.4099	59.2277	58.5493	45.417	31.9078	33.5388	110.24	70.5281	117.469	103.529	73.9801	113.986
evm.TU.scaffold0004.1544	125.328	159.181	148.192	125.035	179.709	163.442	35.2032	38.3198	114.867	61.7271	139.614	54.3536
evm.TU.scaffold0008.1308	180.433	210.027	199.943	167.445	226.058	262.357	0	0.159138	0.415988	2.19849	2.24906	1.32989
evm.TU.scaffold0006.559	67.361	73.8678	73.1691	81.1705	69.5768	67.1099	250.693	254.18	153.654	152.012	82.2831	155.424
gene_16631	86.5591	73.1828	67.6854	75.6558	74.1797	93.1038	70.2071	82.1238	121.467	87.8826	98.76	122.999
evm.TU.scaffold0014.592	100.53	82.0594	117.526	74.7086	103.427	78.1902	11.9235	4.3235	8.22693	9.10311	38.3261	19.2506
evm.TU.scaffold0008.509	72.6541	63.5373	60.6339	70.2629	58.5004	51.2647	208.236	211.785	201.365	219.216	176.281	192.003
evm.TU.scaffold0013.568	156.413	118.74	135.297	118.563	131.144	96.1735	20.2609	24.4264	36.1435	33.3309	127.293	20.329
evm.TU.scaffold0010.998	107.372	103.617	93.0474	101.481	110.985	134.884	113.156	157.098	128.185	150.608	140.323	124.674
evm.TU.scaffold0009.1259	53.4305	47.4568	47.224	57.2374	55.5347	48.7951	271.123	345.942	205.41	107.407	85.908	162.644
evm.TU.scaffold0007.494	67.6697	54.3534	61.8984	66.4995	83.8534	88.2255	101.415	77.0523	76.5623	95.1657	93.6067	136.417
evm.TU.scaffold0011.978	72.6027	70.3197	65.4974	75.1597	50.0231	53.1443	163.794	157.293	137.16	192.698	75.6015	145.342
evm.TU.scaffold0015.148	134.607	129.327	145.906	112.46	128.717	138.385	73.7718	82.2295	75.8697	87.0202	101.055	89.367
evm.TU.scaffold0013.196	87.8121	90.2422	90.6165	83.6038	72.5866	63.919	167.473	178.478	123.661	197.386	118.133	190.4
evm.TU.scaffold0015.643	78.5452	94.1238	81.19	84.6317	72.7493	57.8397	148.218	149.273	127.937	139.444	97.0807	144.446
evm.TU.scaffold0002.193	29.3296	23.4399	29.6855	33.5303	28.1955	31.0223	205.111	435.909	238.232	281.139	79.9152	183.119
evm.TU.scaffold0011.260	58.0098	61.3304	51.3818	53.6846	39.4796	24.5003	228.965	161.873	205.977	235.713	142.993	234.805
evm.TU.scaffold0001.1868	62.2408	72.4492	67.6157	68.1313	47.1219	41.9242	116.284	111.387	101.049	86.8896	101.815	113.409
evm.TU.scaffold0007.1103	45.3786	57.0384	65.0195	64.6505	49.9018	41.6557	62.993	50.9139	50.5538	48.7843	54.6138	54.1722
evm.TU.scaffold0004.1226	185.253	179.214	214.567	125.042	164.826	134.458	54.3953	52.474	32.9821	54.4938	56.6287	32.4945
evm.TU.scaffold0004.264	97.3783	119.294	123.803	105.408	128.544	103.148	13.1192	11.7347	49.2275	21.2745	30.2378	30.8631
evm.TU.scaffold0005.76	132.031	108.433	122.534	107.139	99.8524	97.8496	112.043	116.308	97.0573	110.152	117.146	107.56
evm.TU.scaffold0010.603	112.991	201.974	197.766	162.143	201.65	126.883	0	0	0.0499536	2.16004	0	1.32673
evm.TU.scaffold0004.1041	103.462	91.8506	101.174	85.8544	75.3341	73.3352	101.011	108.195	98.6661	138.662	99.421	94.2099
evm.TU.scaffold0004.433	83.6641	94.3233	96.236	102.329	99.5487	92.1647	97.2003	105.793	96.81	93.6016	61.507	93.3867
evm.TU.scaffold0007.2296	99.4025	98.9348	85.5447	103.151	111.573	116.338	145.331	166.122	130.238	158.15	144.754	120.222
evm.TU.scaffold0011.1421	96.0423	93.7649	101.333	93.1343	77.8887	79.7565	122.374	165.392	101.514	111.359	102.836	138.925
evm.TU.scaffold0009.1143	107.524	125.36	115.768	114.013	126.935	102.77	79.3711	80.7601	78.0895	80.4114	79.7968	94.9072
evm.TU.scaffold0008.398	70.1323	73.5084	71.6699	72.0625	60.2443	49.7549	134.45	134.89	127.627	135.012	118.274	157.212
evm.TU.scaffold0013.178	51.0269	63.5368	67.097	63.2034	73.3718	66.4123	190.031	364.869	141.383	91.2048	56.7198	71.8604
evm.TU.scaffold0004.460	113.507	130.708	117.199	142.436	126.95	109.117	99.4908	97.0562	96.6529	93.1574	105.921	114.346
evm.TU.scaffold0015.714	70.6672	75.6235	76.3116	98.9066	69.8578	41.1022	139.012	131.451	121.169	120.994	111.593	136.091
evm.TU.scaffold0005.602	108.121	108.078	97.666	100.021	101.278	89.0571	136.695	149.904	115.899	131.256	128.004	147.711
evm.TU.scaffold0003.990	114.66	117.053	101.256	120.556	117.521	134.066	81.07	92.7703	93.3632	93.7914	106.028	102.424
evm.TU.scaffold0006.1031	81.7661	95.2653	93.0629	83.7764	100.368	117.428	55.6394	70.2334	61.5411	55.4128	64.6301	64.8915
evm.TU.scaffold0002.159	87.0763	78.2077	168.531	91.202	49.6957	72.4198	11.3746	3.34353	20.6665	256.587	491.109	97.3465
evm.TU.scaffold0014.686	85.4049	78.5068	76.9735	76.4402	54.2843	34.5184	213.105	178.721	198.141	237.504	188.34	192.661
evm.TU.scaffold0002.1992	84.2813	93.3307	88.1116	97.6065	97.4289	102.034	120.688	111.674	121.129	128.646	123.674	126.99
evm.TU.scaffold0011.484	60.5717	66.5189	66.8665	56.9542	38.4788	29.5454	165.286	179.293	166.551	187.295	113.265	166.489
evm.TU.scaffold0001.1905	116.389	104.535	111.95	125.806	115.987	110.202	98.9018	165.608	124.631	120.068	75.2457	109.378
evm.TU.scaffold0006.1430	103.828	110.839	115.497	114.337	103.166	83.9149	100.735	113.497	108.083	111.517	93.4454	103.999
evm.TU.scaffold0002.1372	74.0567	84.9485	124.386	61.9143	110.003	45.5789	107.599	49.5073	398.842	89.2503	115.437	114.443
evm.TU.scaffold0002.1975	85.2081	89.1231	95.6199	86.2319	78.0182	71.0576	114.862	111.226	135.039	112.182	90.3198	113.204
evm.TU.scaffold0008.1010	56.8919	69.2896	64.3854	53.9933	37.483	23.1867	153.025	147.879	145.895	151.096	93.177	132.234
evm.TU.scaffold0002.796	78.1581	103.151	85.2326	91.3579	73.3135	74.6044	91.7103	85.4511	104.832	113.958	78.2811	110.808
evm.TU.scaffold0002.367	63.1482	65.071	56.3002	61.8302	68.4121	85.0649	150.139	173.788	136.285	149.962	124.394	173.296
evm.TU.scaffold0002.2053	94.5746	103.267	101.241	91.6018	79.7674	70.8523	119.113	135.724	111.827	121.64	78.6375	106.359
evm.TU.scaffold0005.1062	68.9594	53.1152	65.4866	64.7511	59.2566	44.1255	201.452	228.782	205.197	230.56	94.9837	190.486
evm.TU.scaffold0002.1358	69.0859	83.7274	62.0262	103.321	50.8955	59.8174	128.946	150.577	140.743	147.936	130.426	163.936
evm.TU.scaffold0002.190	79.4128	79.5447	72.1707	95.3581	95.7106	104.468	163.798	168.811	158.619	131.203	122.93	161.737
evm.TU.scaffold0005.930	94.4853	89.6088	82.6935	76.1616	85.4356	82.7756	113.477	124.278	105.756	110.704	108.227	105.269
evm.TU.scaffold0005.112	77.8669	96.6957	91.0649	78.9594	59.7146	44.7591	124.383	83.5039	102.433	109.707	89.8648	115.754
evm.TU.scaffold0001.1881	103.437	101.927	79.8495	116.983	100.439	62.3016	69.4322	114.603	91.3029	79.1896	75.2457	96.6388
evm.TU.scaffold0003.525	137.579	106.472	92.3702	88.485	110.764	150.179	144.432	121.516	96.7465	115.964	189.245	112.33
evm.TU.scaffold0008.1213	96.2968	98.6546	99.9901	102.263	123.772	137.418	89.136	123.805	90.8399	86.596	78.4092	125.761
evm.TU.scaffold0011.1346	165.669	184.615	206.483	151.692	124.055	101.967	19.0168	13.3741	18.1173	26.0698	68.1406	48.1807
evm.TU.scaffold0001.96	74.6855	79.1428	89.212	86.6466	78.8783	84.9304	127.266	163.398	169.262	233.451	99.4278	178.03
evm.TU.scaffold0010.1063	91.6807	85.5083	88.1055	55.9745	30.0434	52.1444	79.7302	41.7354	41.0494	76.2332	55.2322	86.4686
evm.TU.scaffold0013.570	36.2715	31.1816	39.2849	41.458	34.8363	31.6175	225.237	311.395	285.796	293.443	178.685	169.395
evm.TU.scaffold0012.18	75.7553	84.2532	84.1223	66.0528	52.6142	55.941	155.039	154.617	161.415	183.942	94.0571	166.831
evm.TU.scaffold0007.1608	97.9029	92.6199	101.948	81.1691	108.891	92.2818	10.6799	10.5917	18.9282	13.4302	56.4718	19.0905
evm.TU.scaffold0009.1471	74.0718	66.3231	94.3418	62.2895	66.3277	53.1547	109.408	159.84	104.006	86.6065	108.308	101.248
evm.TU.scaffold0011.104	264.698	223.089	230.201	216.471	231.948	165.294	0.191449	0.400186	0.588424	3.01558	0.368851	0
evm.TU.scaffold0009.767	110.991	100.223	104.892	107.527	104.924	106.658	96.775	135.1	131.488	144.267	93.0028	116.569
evm.TU.scaffold0016.39	62.0441	58.5265	63.9459	69.3851	58.8222	52.1814	226.895	347.204	203.279	224.341	51.7874	164.232
evm.TU.scaffold0005.1785	115.625	117.602	137.725	137.457	149.459	178.53	67.8881	55.26	89.1901	81.9294	100.789	82.2606
evm.TU.scaffold0015.551	99.221	107.975	114.457	100.337	99.2214	93.2772	99.0945	111.592	98.2788	102.624	65.6012	93.8375
evm.TU.scaffold0007.119	62.6586	53.0808	50.7669	42.9105	50.4834	51.8074	99.0198	114.829	102.659	70.8776	71.2554	66.3943
evm.TU.scaffold0011.885	50.5378	45.1353	56.6051	65.3348	68.5787	58.4946	178.63	243.429	173.308	181.757	127.234	244.586
evm.TU.scaffold0009.806	89.4749	90.8188	104.501	84.1926	89.9065	72.8528	149.549	119.332	115.069	124.608	158.747	142.407
novel.484	109.033	89.773	107.671	79.8217	100.651	137.123	67.0061	79.8259	62.5995	67.856	84.2282	77.3968
evm.TU.scaffold0014.509	123.409	158.766	136.044	103.183	140.402	114.716	42.1025	15.0538	18.9186	20.3605	36.1108	37.7777
evm.TU.scaffold0002.706	111.475	119.891	126.145	126.826	113.972	101.335	82.4031	99.8006	90.1619	110.595	79.5977	98.0536
evm.TU.scaffold0003.719	185.458	247.007	222.01	273.902	252.146	312.063	3.13228	15.7547	13.0368	18.6943	9.71216	17.5589
evm.TU.scaffold0001.1959	84.0416	87.414	93.6201	90.0144	102.947	139.32	110.785	100.313	122.218	99.3466	93.7702	110.618
evm.TU.scaffold0008.433	130.37	150.877	128.689	111.859	127.393	132.684	12.7706	13.6063	22.8009	20.8111	132.934	18.4927
evm.TU.scaffold0011.1321	100.914	90.6834	106.149	88.967	117	109.828	117.274	177.294	101.851	106.06	111.383	117.826
evm.TU.scaffold0014.320	48.2755	45.0069	51.4353	61.4285	57.1912	49.5924	181.612	209.415	156.48	315.06	92.5118	191.015
evm.TU.scaffold0007.2222	121.089	112.568	113.935	104.188	120.647	127.064	88.2613	107.071	87.0658	101.04	85.5092	87.7409
evm.TU.scaffold0005.1390	78.5959	79.8351	82.9812	80.4413	78.3938	70.7745	125.253	195.943	146.537	113.652	104.968	120.968
evm.TU.scaffold0007.1673	89.6322	95.4433	87.0374	87.6795	82.1222	75.3158	122.174	76.928	78.0378	72.2144	83.3249	95.9388
evm.TU.scaffold0003.867	89.5747	93.468	93.5727	91.9263	97.9972	88.2228	127.535	110.328	108.632	135.411	115.252	126.568
evm.TU.scaffold0005.957	61.6191	68.8134	70.3704	73.7996	47.4297	39.1791	147.074	118.167	113.59	105.532	112.228	117.645
evm.TU.scaffold0005.2092	234.116	183.69	195.244	147.061	211.651	142.444	0.676613	0.419059	166.033	0.394725	0.168983	0.580859
evm.TU.scaffold0008.246	120.524	158.04	141.039	150.337	113.827	129.14	75.0788	58.2503	94.9166	96.5591	92.9743	76.5061
evm.TU.scaffold0009.1065	98.1766	79.5655	88.6516	83.7448	97.3608	149.543	91.9977	122.154	100.773	91.1375	66.8851	88.0487
evm.TU.scaffold0014.381	57.9144	52.9829	54.3988	49.7157	51.2214	54.4222	182.381	288.264	155.647	158.802	94.9029	154.448
evm.TU.scaffold0006.527	37.8776	29.4198	50.4496	43.0836	19.0542	9.50722	191.876	92.1519	209.309	142.872	162.32	140.293
evm.TU.scaffold0015.784	79.8589	82.8671	86.1014	79.8927	71.6307	57.679	148.235	175.418	140.603	152.875	122.911	149.284
evm.TU.scaffold0007.2150	45.3946	38.5587	41.5153	47.8828	37.9574	37.0136	177.806	144.06	184.386	157.392	209.456	160.2
evm.TU.scaffold0002.1630	59.522	65.6087	62.3566	56.385	45.2998	39.1902	125.303	125.737	123.73	123.928	94.1691	131.784
evm.TU.scaffold0001.929	28.814	31.4838	36.1226	82.7332	42.8176	44.8263	104.634	81.7647	117.396	96.1963	75.1288	97.1296
evm.TU.scaffold0004.410	197.198	204.528	141.605	197.45	169.62	190.916	41.7054	54.4917	53.1388	58.7661	88.8697	40.1963
evm.TU.scaffold0012.44	109.734	114.005	123.761	95.4732	97.2634	77.9213	88.5105	84.0895	99.5714	108.919	73.1367	70.2877
gene_7840	113.368	89.2358	103.311	92.8806	71.7585	105.085	79.8471	118.828	128.486	117.482	109.106	107.145
evm.TU.scaffold0007.996	70.0296	76.2699	74.7905	64.5027	45.4113	48.2341	98.712	96.2908	99.3725	92.3894	58.4325	100.634
evm.TU.scaffold0006.1203	121.165	154.904	130.804	130.025	129.683	121.473	59.0385	60.4633	91.5389	63.8863	65.5636	64.4427
evm.TU.scaffold0002.2084	54.3057	44.4086	52.1098	39.4822	50.3157	46.4327	100.112	104.631	105.46	103.126	73.8847	130.588
evm.TU.scaffold0012.47	111.606	95.3942	108.718	112.447	101.381	104.155	102.951	88.2064	90.4504	82.2988	105.325	104.557
evm.TU.scaffold0002.238	99.4485	98.4886	93.1489	108.54	111.962	127.745	65.3536	95.3185	73.1746	80.5857	63.4586	75.6123
evm.TU.scaffold0002.1203	86.6149	96.3715	90.7033	101.424	92.8561	108.352	96.63	104.549	87.2417	93.0247	86.1475	103.922
evm.TU.scaffold0008.525	69.6954	71.4545	69.4783	96.2673	82.9033	63.4587	85.6547	115.717	93.9865	78.0951	77.8242	111.335
evm.TU.scaffold0013.548	31.548	31.4141	34.0037	30.3019	28.7048	24.2503	334.357	66.2803	150.807	199.73	333.763	186.795
evm.TU.scaffold0005.1914	66.5391	80.9644	68.9734	67.4309	56.1499	48.1157	79.1445	71.2712	81.0841	84.4243	70.8663	92.0471
evm.TU.scaffold0008.930	75.4452	79.1223	84.7489	92.2518	88.0249	70.8526	128.708	126.051	108.841	124.099	94.5357	130.171
evm.TU.scaffold0002.876	26.2745	25.9342	21.8431	30.8169	21.0146	18.6808	189.236	345.04	243.778	476.224	77.6459	240.928
evm.TU.scaffold0008.875	89.2409	95.9956	102.064	80.4371	72.4692	55.9169	93.7209	68.3618	86.047	76.0885	91.622	86.2343
evm.TU.scaffold0001.2391	102.679	98.616	96.3708	97.5667	103.768	108.773	123.107	107.001	110.327	117.212	153.901	144.7
evm.TU.scaffold0007.1171	64.0775	68.5304	74.0188	70.3541	65.3925	61.9629	145.613	122.381	133.077	123.323	131.176	154.888
evm.TU.scaffold0009.1203	80.7078	79.9902	90.5083	74.8886	86.9845	85.2884	100.96	131.559	94.7242	90.9632	67.1126	91.6306
evm.TU.scaffold0004.1614	103.479	102.885	100.802	102.455	109.584	122.896	88.2613	100.318	96.6788	84.4277	84.8108	84.2042
gene_16143	71.4264	60.9856	70.677	60.3615	40.567	31.1789	131.58	133.633	128.613	124.043	93.1613	111.987
evm.TU.scaffold0015.699	52.2945	61.0159	58.3941	52.1209	48.9578	35.4427	94.8017	95.5931	83.9585	93.4926	96.6296	95.8758
evm.TU.scaffold0010.1327	74.3448	77.4366	98.3332	73.318	52.0512	38.8356	69.2436	54.2281	63.5952	76.3401	63.4317	87.0853
evm.TU.scaffold0003.1331	91.7728	107.056	113.819	89.7016	86.1301	72.936	146.881	136.167	119.937	144.696	69.5975	127.793
evm.TU.scaffold0009.1185	56.3699	59.7353	53.7494	52.4039	68.6334	70.73	64.3695	80.2773	65.947	73.622	58.6638	78.719
evm.TU.scaffold0007.1282	54.0238	73.8467	52.1897	107.417	60.6815	57.2155	158.46	99.4962	122.956	118.55	137.363	174.043
evm.TU.scaffold0004.149	81.509	62.1486	65.1394	70.9876	64.1098	51.0031	247	148.299	152.186	306.204	141.309	159.566
evm.TU.scaffold0007.2674	77.0605	81.8945	88.4293	65.9246	73.8423	67.958	136.676	109.453	111.107	114.325	104.915	128.102
evm.TU.scaffold0009.625	49.1843	64.286	66.0268	57.5018	49.6349	38.5152	132.942	90.9222	106.701	116.401	90.885	110.824
evm.TU.scaffold0005.475	87.5541	110.71	126.525	78.9256	121.981	124.716	18.0849	5.69723	42.5752	103.603	288.195	147.291
evm.TU.scaffold0012.636	92.7127	71.8812	83.0487	78.1579	116.241	168.83	76.0323	107.298	77.4899	72.5115	107.289	85.6032
evm.TU.scaffold0001.2062	166.451	194.027	201.443	168.654	201.826	162.423	2.9146	1.52309	1.69208	3.53881	5.61535	6.26619
evm.TU.scaffold0001.1536	72.305	58.6132	59.0944	69.8509	77.4192	90.4732	142.658	123.056	132.366	155.762	213.722	167.751
evm.TU.scaffold0002.1418	78.6175	79.3544	88.2585	75.0815	66.5651	58.0706	93.7734	112.187	75.6308	90.7447	92.2552	77.5126
evm.TU.scaffold0008.331	88.2514	77.8725	82.2454	72.8008	79.2583	79.4979	154.805	154.168	146.23	148.575	166.977	141.514
evm.TU.scaffold0004.1263	40.4257	39.0075	37.772	70.464	49.1211	43.7403	225.558	278.879	230.197	202.971	81.4697	178.041
evm.TU.scaffold0015.161	69.9389	70.2821	71.1801	87.5791	92.1756	85.4955	79.6317	110.837	93.7851	85.7533	61.5757	105.597
evm.TU.scaffold0013.500	68.138	68.3106	79.3097	64.3532	60.3696	47.4687	152.82	142.267	134.187	133.772	75.1694	135.186
evm.TU.scaffold0005.1876	59.0123	55.136	79.9939	58.3435	76.8017	64.9356	93.1659	165.468	237.169	162.298	70.4908	132.566
evm.TU.scaffold0004.478	111.367	103.769	101.258	86.0242	118.219	135.555	87.6998	120.42	90.0887	84.9554	79.0005	95.2171
evm.TU.scaffold0007.204	42.4179	41.9901	42.5693	57.7539	33.961	31.3067	138.829	145.766	164.643	184.89	165.294	237.985
evm.TU.scaffold0002.1721	129.041	108.728	107.741	111.083	97.2994	95.4855	129.446	140.392	110.263	144.619	78.5234	127.024
evm.TU.scaffold0011.963	55.8968	65.0791	59.2875	62.0145	59.4625	67.4511	132.168	160.753	99.1929	139.111	74.2491	123.726
evm.TU.scaffold0006.769	68.0247	72.5177	77.709	77.4496	85.5295	102.385	112.633	170.37	141.743	137.194	71.0058	120.777
evm.TU.scaffold0005.1568	117.655	140.546	125.915	128.095	145.788	152.622	51.4094	46.0878	46.937	52.3011	61.5307	45.2774
evm.TU.scaffold0001.2457	75.9463	79.0199	74.9571	75.9938	78.9795	84.4707	119.923	166.384	105.809	151.724	105.218	133.062
evm.TU.scaffold0007.1317	44.1965	41.3372	42.9946	42.0408	46.9093	51.7196	126.729	185.431	169.494	161.507	97.886	156.277
evm.TU.scaffold0007.2440	82.353	69.7022	86.383	102.119	86.3349	109.593	105.15	134.232	90.5418	127.669	84.4102	130.694
evm.TU.scaffold0007.1276	79.7068	87.9206	86.1192	76.7955	66.9618	61.2367	146.938	105.317	108.614	116.19	126.916	130.232
evm.TU.scaffold0009.1181	98.9842	98.0847	100.605	109.882	121.34	101.583	90.8898	72.1699	70.4373	96.9189	65.9989	133.315
evm.TU.scaffold0006.1237	77.1114	72.672	75.6827	58.1004	43.2715	36.5882	121.735	148.715	104.127	83.6427	91.5269	120.15
evm.TU.scaffold0014.414	83.0049	74.1983	83.0941	88.4298	103.186	99.6956	133.802	162.404	125.168	115.565	71.3333	131.423
evm.TU.scaffold0003.887	77.6947	78.0616	82.8678	84.2886	64.083	62.0115	163.166	137.359	111.782	160.996	102.716	114.08
gene_1364	39.1123	73.3038	50.7425	65.4439	83.2144	60.6257	36.5521	77.4513	53.8634	30.5617	35.2111	32.295
evm.TU.scaffold0002.525	84.6554	101.263	82.8973	92.068	90.9149	118.864	84.9915	79.0999	89.977	105.319	147.502	119.642
evm.TU.scaffold0008.892	29.8263	38.2346	29.4103	33.5875	35.4762	34.7706	73.5165	72.1335	81.0063	68.5102	49.6105	78.912
evm.TU.scaffold0008.311	152.695	189.733	199.088	160.59	163.771	82.6867	0.904066	0.377953	1.38933	4.45007	4.70286	1.54887
evm.TU.scaffold0011.1013	48.8686	47.5098	64.6564	49.9614	43.6771	38.4973	165.824	89.6316	196.73	133.929	174.006	136.282
evm.TU.scaffold0012.646	106.842	107.188	83.3108	107.982	113.452	139.793	69.2873	69.0537	64.5282	46.6433	78.3024	71.7977
evm.TU.scaffold0001.996	91.6143	79.8821	93.4679	71.5167	87.4618	95.4094	102.439	100.97	87.7501	72.9386	77.6667	96.1446
evm.TU.scaffold0012.33	84.9532	95.3096	103.372	94.6323	93.9336	87.2581	104.978	131.777	111.847	122.627	62.9933	122.978
evm.TU.scaffold0006.123	47.6176	28.5649	37.7692	27.2442	28.8992	29.2736	144.692	108.267	181.296	142.535	289.069	126.888
evm.TU.scaffold0015.89	66.8934	67.4523	63.7876	71.3208	69.0884	54.6003	164.689	139.319	126.748	131.7	132.026	157.438
evm.TU.scaffold0008.1671	98.4115	93.1686	95.5308	87.8583	117.601	131.291	91.8297	119.384	94.2954	70.3514	73.6275	82.5986
evm.TU.scaffold0005.1504	105.721	89.3297	100.324	105.256	113.713	126.609	120.598	177.409	126.345	128.858	73.3014	124.181
evm.TU.scaffold0007.1142	87.0695	98.9888	89.6166	88.3351	88.2134	85.5893	110.275	97.2451	80.516	91.881	76.7211	98.8812
evm.TU.scaffold0005.1624	63.0866	70.7674	77.4393	70.2631	63.7804	56.0788	88.6888	75.4017	86.787	92.0275	69.0623	90.0167
evm.TU.scaffold0001.1060	129.393	135.298	121.354	118.407	101.249	94.4867	117.287	74.5526	72.65	82.1537	89.0003	92.4435
evm.TU.scaffold0006.1218	135.779	138.496	134.095	125.521	126.36	119.01	69.5781	92.6144	81.1464	94.9908	96.9552	83.1291
evm.TU.scaffold0008.1062	50.7468	71.1257	64.661	44.0762	20.8766	18.5068	156.451	68.7477	95.2352	135.357	84.4864	146.16
evm.TU.scaffold0012.48	87.3546	109.585	85.0623	85.5618	84.5412	91.2408	125.8	75.8418	116.764	122.461	160.901	134.112
evm.TU.scaffold0008.917	55.6843	67.2305	61.3742	79.8211	59.5815	58.8847	164.234	140.04	126.947	132.894	85.1498	143.847
evm.TU.scaffold0010.445	66.4514	64.2017	69.8252	74.118	62.0782	56.3918	174.754	189.68	139.876	170.591	101.856	140.634
evm.TU.scaffold0002.668	80.8777	76.4215	74.1764	88.1123	90.4146	119.975	72.7668	100.543	114.984	103.069	67.1931	101.782
evm.TU.scaffold0014.281	117.776	113.278	123.677	89.2083	47.5986	39.9417	128.041	89.9617	96.3446	153.191	176.459	116.381
evm.TU.scaffold0011.473	60.335	57.7578	60.6892	57.8748	48.943	47.3234	135.62	94.4516	103.852	85.2341	91.8046	118.206
evm.TU.scaffold0002.275	71.0354	67.5524	67.0447	57.7184	76.8991	95.4033	143.507	118.449	192.413	83.8518	78.8427	212.46
evm.TU.scaffold0007.685	84.7058	84.6807	80.853	89.9966	88.2146	88.0612	125.472	88.9667	105.641	113.337	119.707	145.448
evm.TU.scaffold0011.332	102.201	94.2876	88.6705	78.0863	78.5514	49.5929	154.229	41.7996	141.547	111.189	232.855	178.832
evm.TU.scaffold0011.952	51.3595	61.6939	48.5458	58.7598	56.843	64.3735	91.6032	111.572	140.166	101.365	50.3918	101.858
evm.TU.scaffold0007.1167	106.57	98.4485	107.529	110.952	102.504	85.5165	121.269	114.947	110.102	94.219	95.0279	96.3078
evm.TU.scaffold0002.1645	60.3718	66.7439	63.2826	58.1823	53.3787	50.4477	162.874	152.947	119.26	134.617	110.855	130.145
evm.TU.scaffold0006.65	112.16	90.8606	98.6834	83.6429	86.76	93.3514	102.755	117.77	108.842	160.138	143.613	121.282
evm.TU.scaffold0007.122	47.6098	72.625	55.5047	89.0296	75.8301	78.99	90.3714	116.777	93.2337	120.572	80.3595	96.934
evm.TU.scaffold0005.87	47.1614	50.1342	44.4624	37.7348	29.1612	19.8571	64.338	53.4393	67.6545	56.2799	65.431	78.1486
evm.TU.scaffold0008.478	70.4729	68.3311	69.3391	69.3644	51.1779	58.56	96.6265	19.1496	20.0887	92.5932	113.519	174.866
evm.TU.scaffold0001.1155	73.2595	66.5326	69.1201	63.1445	53.1702	58.169	95.6395	125.036	113.5	89.9648	60.1638	109.932
evm.TU.scaffold0007.1977	104.105	112.893	112.355	93.943	80.1305	63.1017	119.643	105.008	106.576	142.16	96.318	113.685
gene_12786	73.8337	75.9777	88.098	63.9899	57.4466	58.3261	72.7243	107.443	90.1438	72.2569	73.0835	60.1703
evm.TU.scaffold0010.976	46.138	41.4276	40.4648	40.9207	47.6662	51.153	163.003	264.331	185.754	251.785	120.445	162.085
evm.TU.scaffold0005.2026	62.0922	63.8354	50.8855	83.4602	82.9033	86.1225	101.958	162.258	131.132	143.254	69.151	105.94
novel.1563	91.0464	77.4815	98.0435	53.8899	61.4205	81.1683	84.5667	74.7785	73.9631	88.4425	91.4142	87.2849
evm.TU.scaffold0009.1031	102.043	84.7127	79.8632	103.416	108.985	121.553	99.9436	162.093	117.47	125.296	81.3214	105.122
evm.TU.scaffold0008.248	75.3667	74.7525	79.599	63.1374	70.2312	68.9419	111.646	122.528	140.499	125.344	77.2155	117.323
evm.TU.scaffold0001.592	210.82	147.832	187.935	142.503	159.957	115.344	0.222539	0.69776	135.998	0.219081	1.28625	1.12135
evm.TU.scaffold0010.1358	70.5442	61.2415	66.0886	67.4763	51.0867	45.8266	154.936	118.163	125.769	108.962	112.153	133.892
evm.TU.scaffold0007.364	117.443	97.4717	103.85	92.1221	140.753	157.041	73.562	87.5053	88.3554	74.3245	83.078	68.2817
evm.TU.scaffold0002.1163	56.2419	49.0122	53.8417	48.0711	54.8177	45.1745	212.712	218.312	156.792	219.378	91.8836	152.072
evm.TU.scaffold0007.1009	55.2596	64.6087	64.2419	58.3477	52.5117	55.1947	113.438	100.276	116.079	96.5221	69.955	103.865
evm.TU.scaffold0010.226	52.7738	53.155	55.4293	55.7771	59.4501	72.9667	141.697	196.464	130.368	143.983	64.9748	121.232
evm.TU.scaffold0002.1107	77.996	72.144	69.1662	72.7601	79.5577	80.3724	137.773	232.318	160.737	146.764	57.6167	115.23
evm.TU.scaffold0009.446	85.7894	95.9449	90.1918	91.7205	78.5297	82.4382	128.05	141.175	121.944	106.802	101.057	111.276
evm.TU.scaffold0011.347	72.9435	78.0005	76.564	74.8788	71.9366	85.2341	104.203	92.2588	87.5104	88.9564	92.1786	95.5479
evm.TU.scaffold0004.1335	32.6314	31.0846	33.3671	27.6727	25.7654	28.9796	220.397	278.562	133.597	205.698	103.866	129.456
evm.TU.scaffold0006.767	83.4154	88.2864	87.915	93.4629	98.4077	101.471	80.631	103.834	84.7583	87.292	63.0515	88.8159
evm.TU.scaffold0011.1003	59.5867	58.4096	60.4533	56.4523	77.2559	95.5141	122.571	185.867	123.184	121.029	71.933	117.336
evm.TU.scaffold0001.556	123.4	143.018	180.857	108.107	99.131	61.728	19.5673	15.6679	20.2085	20.6613	73.5736	21.6279
evm.TU.scaffold0007.1714	102.31	131.857	108.061	116.339	154.662	167.668	3.45805	5.74016	8.0234	8.21039	57.1201	8.4049
evm.TU.scaffold0010.1242	39.8183	38.5713	34.1195	49.5465	51.5891	54.3273	184.702	134.506	217.247	170.042	195.777	153.715
evm.TU.scaffold0009.502	84.4804	90.3759	87.6005	90.362	85.6624	71.7639	33.6817	25.3141	37.2988	27.2717	46.0807	46.9873
evm.TU.scaffold0015.269	92.7039	99.902	106.61	82.5336	74.2499	92.0409	98.8226	124.003	110.338	133.114	59.8545	110.922
evm.TU.scaffold0015.401	45.7139	57.1862	50.8347	62.2419	58.1357	59.9778	133.299	91.6089	98.8951	99.4643	95.158	107.296
evm.TU.scaffold0009.536	81.0915	84.4938	75.3888	88.2465	90.6193	100.445	70.036	65.3103	60.8504	69.8391	121.993	90.7361
evm.TU.scaffold0008.125	29.015	31.2822	29.8608	26.5051	32.9878	39.8184	180.492	262.383	147.208	220.249	61.1565	158.248
evm.TU.scaffold0006.754	67.1149	56.1606	191.621	55.9825	61.491	59.2582	49.9207	54.016	153.433	50.1085	54.8784	101.999
evm.TU.scaffold0006.723	28.9449	31.222	22.6345	41.0139	32.0393	36.943	193.007	300.034	173.332	299.081	82.1832	237.72
evm.TU.scaffold0005.1943	55.9574	43.4375	58.2368	57.425	49.2471	47.3458	239.541	238.434	180.375	141.345	69.0349	193.674
evm.TU.scaffold0013.566	97.6922	101.783	112.49	100.756	118.997	127.26	77.3048	72.1255	84.7469	94.0234	79.352	78.4868
evm.TU.scaffold0004.1435	116.386	110.572	127.676	72.8271	76.4655	47.8123	106.496	85.5903	90.001	59.9516	85.7558	90.678
evm.TU.scaffold0008.297	50.6435	55.335	50.6139	62.79	49.2618	62.0871	128.744	238	166.742	267.679	78.2686	129.831
evm.TU.scaffold0002.1165	82.275	79.1495	70.5499	57.2096	70.5787	79.5786	63.7024	71.8625	87.7951	72.169	74.2716	71.3312
evm.TU.scaffold0008.57	101.295	111.859	102.548	97.8692	120.942	130.983	58.7547	67.5542	56.5678	57.8978	67.5451	53.9179
evm.TU.scaffold0002.1293	103.426	100.142	99.499	80.6028	78.6442	97.3861	111.725	114.322	119.121	140.097	103.778	123.701
evm.TU.scaffold0012.890	99.6339	81.471	81.4625	76.0531	81.9333	107.335	59.1427	66.021	49.6837	53.9074	66.9712	66.546
evm.TU.scaffold0011.341	101.63	112.189	101.402	113.15	107.186	132.42	74.3849	78.8417	87.5632	73.511	96.6919	79.8746
evm.TU.scaffold0012.217	17.6461	16.3891	16.0292	29.6772	21.9696	25.0736	194.073	368.378	191.749	171.753	49.9316	210.484
evm.TU.scaffold0004.989	80.5976	84.2237	85.2662	78.3402	81.8171	103.209	83.3542	125.847	89.8581	93.519	75.6737	98.6003
evm.TU.scaffold0009.566	70.4804	80.6391	76.8993	65.0551	71.7349	84.1803	113.005	102.047	104.296	110.619	76.9932	98.0762
evm.TU.scaffold0015.532	57.3755	62.5999	65.8249	51.4422	53.5164	52.5045	102.851	92.7433	83.2665	84.6429	75.2457	89.4275
evm.TU.scaffold0001.1899	117.909	104.854	105.027	99.2308	133.963	137.599	85.0647	105.905	90.476	80.908	89.7637	87.1775
evm.TU.scaffold0001.2006	178.671	209.141	233.732	182.053	210.565	199.556	0.293967	0.833935	0.516294	1.81908	1.78001	2.66629
evm.TU.scaffold0002.1465	115.195	109.352	104.049	139.239	111.332	98.6595	106.6	120.687	100.211	147.272	69.2845	99.4578
evm.TU.scaffold0007.2507	86.0991	82.185	88.7214	80.0143	70.4604	62.7274	64.3116	65.401	73.3568	68.4386	71.3162	70.2349
evm.TU.scaffold0011.394	74.3154	79.0357	90.5374	71.2455	86.7582	107.859	114.77	142.426	101.658	93.9856	81.6097	99.2147
evm.TU.scaffold0011.11	53.5151	54.7325	47.1028	66.2014	39.7596	29.1003	142.11	67.0456	166.082	115.086	188.005	104.502
evm.TU.scaffold0001.1943	86.4919	93.1178	92.0546	85.5801	78.3008	78.6691	86.9453	63.2532	78.3584	89.6372	113.54	89.418
evm.TU.scaffold0005.187	105.091	95.7009	92.5421	92.6436	107.196	111.879	89.0853	127.155	118.486	113.151	92.8528	116.242
evm.TU.scaffold0010.544	103.342	108.311	90.1183	104.446	110.853	145.638	98.4436	97.6903	86.02	100.082	79.0502	113.804
evm.TU.scaffold0010.562	156.708	168.416	196.239	173.414	123.599	130.158	0.378721	0.692685	0.970007	1.30492	4.10431	0.286251
evm.TU.scaffold0002.1605	40.0729	46.2972	37.3044	46.881	39.067	42.1189	124.071	101.249	116.853	103.464	95.8596	139.803
evm.TU.scaffold0010.111	122.925	116.022	125.648	98.0884	118.213	147.142	68.0486	97.0189	72.938	90.0231	75.2457	74.0289
evm.TU.scaffold0001.2466	62.7849	67.491	61.4347	68.7771	64.8722	67.9636	121.464	139.762	129.405	134.674	88.4766	144.276
evm.TU.scaffold0006.1100	100.708	88.2876	90.0404	97.1673	93.3277	118.463	91.3566	146.683	111.999	114.497	94.4722	105.873
evm.TU.scaffold0008.530	48.5388	44.8457	31.7683	62.6292	35.059	31.646	206.934	141.798	219.058	238.442	66.0534	264.217
evm.TU.scaffold0001.2163	39.4123	29.1157	36.7097	24.6068	33.2907	27.2094	220.618	264.432	190.299	192.625	134.442	187.895
evm.TU.scaffold0008.1408	72.5521	64.4335	54.8332	60.179	74.5864	77.936	111.6	168.915	105.736	194.52	233.823	112.727
evm.TU.scaffold0005.243	57.329	56.8898	56.0438	53.8225	48.2371	48.103	116.74	123.795	143.98	137.512	86.1419	134.532
evm.TU.scaffold0005.1955	80.85	92.6435	93.368	92.6005	99.4347	102.09	91.3996	111.952	86.5907	130.021	57.0516	115.088
evm.TU.scaffold0001.987	111.288	97.4908	92.3714	92.9223	89.2104	81.5541	47.4374	52.5614	65.4091	62.3254	94.8302	62.9033
evm.TU.scaffold0015.496	80.4159	78.8753	84.9906	68.7614	60.534	50.5644	105.395	57.1755	84.708	76.3519	86.1857	90.164
evm.TU.scaffold0011.922	55.6351	64.5347	62.824	64.6925	57.5489	45.7924	130.45	151.258	120.648	177.475	72.19	149.313
evm.TU.scaffold0010.1302	92.7051	95.5127	85.2264	104.955	120.254	148.096	84.7719	121.001	73.9461	91.9191	93.2113	92.6322
evm.TU.scaffold0014.549	33.6416	49.3511	42.8302	41.7518	25.9433	29.4076	61.8528	50.7312	57.8164	55.9042	68.4361	68.6269
evm.TU.scaffold0009.561	71.914	66.1006	60.2063	70.1838	42.1446	30.3129	100.216	122.882	103.644	109.205	79.8179	121.085
evm.TU.scaffold0004.103	77.8671	76.2838	93.5127	108.976	98.1793	115.468	113.955	95.6023	128.901	46.248	114.106	95.4641
evm.TU.scaffold0001.897	19.8898	23.2714	19.1374	17.7926	15.8014	26.3393	197.277	62.7827	221.594	129.314	161.482	337.381
evm.TU.scaffold0008.1049	69.6393	68.7985	71.9698	81.756	69.6759	92.0521	92.6708	81.1936	91.6756	80.7683	87.1212	100.782
evm.TU.scaffold0014.598	72.7169	62.3919	115.488	44.7744	44.1283	40.3371	26.8105	17.5131	24.8264	19.5416	17.6318	21.8231
evm.TU.scaffold0002.698	99.7058	123.967	119.585	105.46	119.524	113.192	52.6511	52.0135	46.6521	41.9887	50.9418	44.7276
evm.TU.scaffold0009.851	64.6873	73.3533	63.4348	63.6651	55.5317	53.7548	92.1062	95.8111	101.588	72.8388	94.9977	133.822
evm.TU.scaffold0004.407	32.6833	26.1003	25.5565	37.2479	23.0662	30.1291	301.542	266.579	163.505	200.611	122.853	177.895
evm.TU.scaffold0005.69	33.16	49.8183	32.243	47.8542	43.8057	45.2501	145.936	177.002	106.513	112.747	360.038	133.883
evm.TU.scaffold0015.748	65.7912	78.133	66.4627	61.6342	47.5679	43.5129	115.413	80.1904	106.039	116.8	67.5077	99.655
evm.TU.scaffold0008.1647	265.128	247.617	345.614	107.678	112.097	122.874	0.102508	0	0.10502	0.151373	1.48121	0.309918
evm.TU.scaffold0004.1598	71.6042	75.1335	68.4404	88.3827	70.627	64.2029	102.752	100.197	97.1959	103.414	91.4865	99.7309
evm.TU.scaffold0009.974	94.0085	103.802	88.9774	85.2674	94.1395	111.551	61.7947	79.3399	75.1648	71.3151	51.0556	70.7888
evm.TU.scaffold0007.1624	34.0694	38.3629	35.6109	36.1722	31.0259	25.9737	193.56	117.208	158.629	166.806	173.854	293.032
evm.TU.scaffold0007.192	90.8636	95.0196	104.125	113.563	71.9689	75.1085	32.7272	20.0315	31.3063	23.1404	34.836	32.2529
evm.TU.scaffold0009.308	70.4848	70.822	61.8268	70.1498	59.4124	85.2609	79.1445	66.9517	96.1154	67.1326	26.8735	86.8409
evm.TU.scaffold0002.1674	55.1145	42.1697	42.9879	56.0836	47.1178	35.6345	153.908	108.851	235.186	131.651	245.385	134.187
evm.TU.scaffold0008.491	69.4463	64.6365	80.1476	78.2309	70.3701	57.4434	127.331	134.255	91.4578	104.403	74.829	108.271
evm.TU.scaffold0015.796	45.9893	43.3906	45.7403	55.3958	44.4102	46.5861	168.213	195.859	175.846	225.296	66.665	205.084
evm.TU.scaffold0014.500	79.9306	78.9126	79.3444	76.6392	60.8205	54.159	154.197	186.86	129.622	186.737	86.0216	124.007
evm.TU.scaffold0013.242	36.3793	36.5871	31.8463	57.853	54.8704	45.4833	182.62	133.471	186.726	188.522	214.179	154.254
evm.TU.scaffold0002.1284	75.8744	77.425	79.6707	57.2901	53.3037	54.597	66.62	95.3202	67.9547	52.2672	99.0665	100.268
evm.TU.scaffold0007.503	68.906	74.2277	71.0632	56.1627	69.6955	48.8981	71.2819	111.973	78.4951	73.5357	57.565	80.6548
evm.TU.scaffold0002.1143	81.1379	83.6404	79.1155	92.9357	88.3222	97.1607	86.3763	89.1572	77.2616	98.0188	107.176	109.49
evm.TU.scaffold0015.405	49.3051	58.5335	64.7278	52.3693	59.0066	57.8088	50.4962	78.0645	66.8227	67.3175	45.6034	72.0929
evm.TU.scaffold0010.636	97.8336	83.2975	99.3436	80.7738	110.026	79.8485	51.1216	66.7041	59.2059	75.9595	103.998	67.5192
evm.TU.scaffold0005.900	114.326	178.968	153.875	145.883	179.856	129.211	41.3631	50.1975	16.0518	18.6775	5.92745	18.0864
evm.TU.scaffold0002.829	82.6003	85.4749	87.6385	73.7808	86.1699	90.5395	132.471	97.3768	85.1683	108.315	130.442	130.006
evm.TU.scaffold0010.1395	81.6958	93.072	94.0903	80.9443	73.1669	69.4525	97.6693	111.248	93.3014	113.424	75.9047	98.8348
evm.TU.scaffold0009.1254	52.9291	63.5657	55.0405	88.0566	52.0151	57.5855	103.764	110.617	94.8189	108.049	91.3011	111.615
evm.TU.scaffold0006.487	112.471	79.9032	74.2575	82.8259	85.5482	67.4548	68.684	32.9992	228.732	51.2649	72.7952	47.9553
evm.TU.scaffold0008.907	62.3296	62.5003	69.4394	66.9759	56.5169	54.365	63.6462	62.1325	65.5547	59.083	45.519	65.7421
evm.TU.scaffold0013.31	60.1711	59.9506	66.146	69.4357	65.2113	77.2795	129.14	80.5997	85.4892	85.4414	56.2076	118.764
gene_4863	129.983	143.386	149.307	142.878	162.351	131.988	40.8444	71.7707	44.8999	69.9511	41.1649	37.2563
evm.TU.scaffold0009.350	64.0851	63.9388	61.9547	63.9505	68.4996	76.5486	84.6942	92.677	77.7104	100.692	89.8689	96.1957
evm.TU.scaffold0007.2621	167.146	178.485	239.772	118.973	139.331	146.363	14.9957	6.70923	12.3642	29.1714	32.5026	36.6424
evm.TU.scaffold0014.19	124.198	112.586	121.477	111.691	108.706	96.3111	64.0343	75.5538	75.6882	73.8756	72.2889	65.4925
evm.TU.scaffold0002.1747	33.7453	40.1148	39.535	45.4741	29.6885	20.5529	62.9327	60.2827	69.2598	58.5063	68.2722	77.8954
evm.TU.scaffold0013.901	85.6352	76.2476	78.2545	70.021	56.2245	56.9563	130.357	139.107	96.5221	112.816	82.1762	166.415
evm.TU.scaffold0011.511	99.2768	95.4506	93.1969	101.47	115.693	144.113	42.9314	44.4542	48.0561	48.819	50.7382	44.5674
evm.TU.scaffold0006.731	122.673	116.486	104.454	115.463	117.052	107.543	104.537	85.4018	70.3454	94.3891	73.8677	64.7077
evm.TU.scaffold0014.722	101.418	124.027	110.449	62.8086	57.6662	36.7666	133.965	26.5543	115.844	96.8451	260.831	65.9166
evm.TU.scaffold0012.678	112.037	106.899	100.717	113.555	117.752	114.305	55.5702	54.4601	44.7884	43.2998	65.3027	61.0022
evm.TU.scaffold0008.835	100.236	100.962	112.525	94.2002	72.7922	46.0217	94.775	64.8265	97.0977	78.72	91.0751	112.539
evm.TU.scaffold0002.40	132.964	165.641	185.458	174.699	169.589	115.618	0	0	0	0	0	0
evm.TU.scaffold0015.415	33.6967	33.7022	32.2174	38.9893	32.5816	24.8243	190.194	100.397	194.776	164.032	238.649	167.841
evm.TU.scaffold0010.1121	100.289	103.975	90.1983	107.778	123.31	138.052	52.4145	68.4762	49.8634	64.1648	79.9998	70.144
evm.TU.scaffold0013.892	210.092	155.252	116.365	134.687	170.517	230.858	43.1776	38.5213	36.3529	43.0476	80.4738	54.2794
evm.TU.scaffold0007.1004	65.501	36.9637	37.5694	36.7477	39.2673	33.4437	165.394	181.39	154.875	113.012	209.34	191.041
evm.TU.scaffold0002.520	105.138	101.573	107.974	86.0125	88.5377	89.9497	115.228	167.329	105.377	123.981	70.7985	90.4432
evm.TU.scaffold0005.220	73.4136	85.0375	68.8234	82.2221	84.204	90.9714	92.4669	127.09	109.873	124.698	110.903	126.376
evm.TU.scaffold0002.1742	82.1475	89.2258	92.821	82.2016	82.0599	63.2474	73.5372	38.1222	123.523	56.2297	137.95	91.4843
evm.TU.scaffold0007.1191	83.4608	83.9707	86.5918	77.1218	75.6322	79.2077	125.681	82.6062	86.9644	103.159	110.022	115.326
evm.TU.scaffold0012.340	108.944	109.609	102.218	93.0229	131.22	126.171	65.7736	76.0746	68.992	72.8351	115.194	65.7032
evm.TU.scaffold0011.221	72.1173	78.9117	80.4338	89.4979	98.795	91.6734	101.485	84.7302	85.5829	106.947	95.9097	103.667
evm.TU.scaffold0001.423	80.3777	103.658	80.6717	71.6329	80.3964	76.3333	48.5237	29.068	63.9599	44.5655	60.4246	47.1122
evm.TU.scaffold0002.774	100.81	99.6196	103.964	105.45	102.271	94.2493	43.5798	30.3971	58.4584	30.1772	65.373	57.0387
evm.TU.scaffold0002.2	62.625	66.3886	63.8733	64.1894	52.8402	52.0404	146.069	143.652	146.626	154.688	96.4478	139.773
evm.TU.scaffold0007.875	158.696	128.092	147.061	111.958	115.936	100.705	37.2138	25.9876	34.0945	41.4982	65.0839	42.9875
evm.TU.scaffold0010.599	159.958	102.397	98.6015	133.958	64.3307	292.068	0.081621	0.767754	0	0.200881	0.511073	10.4876
evm.TU.scaffold0014.97	94.0049	114.677	122.219	104.759	120.62	101.114	31.8231	20.7941	51.0625	29.8795	82.2862	41.5334
evm.TU.scaffold0012.760	68.1975	85.7941	73.5219	94.3147	97.2434	95.2153	92.8051	83.0302	78.7022	83.3551	85.8034	82.8482
evm.TU.scaffold0005.1284	82.2824	82.7271	83.3799	89.116	95.1043	105.928	81.7852	106.346	76.7526	83.8165	81.7854	95.5414
evm.TU.scaffold0001.1024	61.7633	63.4952	67.7056	66.9752	73.7516	77.1749	94.3844	109.402	81.1972	101.317	51.4348	90.5092
evm.TU.scaffold0006.627	65.6641	74.4837	87.5023	63.9813	51.4304	60.5849	65.1366	58.4568	58.2903	69.9929	53.7952	58.5755
evm.TU.scaffold0003.120	63.9859	55.4551	60.2357	69.7502	66.5603	64.4676	140.659	194.341	149.321	168.252	102.131	152.249
evm.TU.scaffold0008.767	68.9105	76.0746	76.6125	69.2704	74.8792	79.7365	75.004	82.4218	79.9158	74.7876	71.3234	88.3295
evm.TU.scaffold0007.230	96.6182	94.2039	95.3033	91.8613	85.8873	74.4878	99.6295	107.126	81.3483	115.664	74.3474	103.296
evm.TU.scaffold0006.275	58.7354	46.5907	51.2924	50.2066	53.8511	75.3148	154.387	170.828	129.028	160.231	106.626	122.529
evm.TU.scaffold0006.1155	123.274	114.49	96.2617	120.794	115.96	100.701	79.3173	93.8724	84.7501	134.099	82.0116	78.0041
evm.TU.scaffold0008.785	76.6305	62.2123	74.9975	73.5763	55.1	43.7176	165.682	156.308	113.347	138.362	115.95	151.355
evm.TU.scaffold0001.1180	55.8727	61.7633	66.2867	61.5047	73.2549	21.768	193.741	252.627	76.875	101.924	47.5964	218.595
evm.TU.scaffold0010.435	129.773	106.279	110.789	104.877	115.417	106.719	90.0768	83.3387	83.8504	100.457	103.832	85.4719
evm.TU.scaffold0004.1689	60.0481	68.4445	55.1505	48.4327	49.9208	46.666	110.427	102.16	85.1967	58.0517	114.558	98.8796
evm.TU.scaffold0002.1777	63.2211	72.9205	70.0537	78.3068	63.1042	33.4885	85.8604	81.9618	77.8027	93.3753	83.6063	89.6522
evm.TU.scaffold0001.88	36.6457	25.1698	28.8651	70.3291	42.8816	44.0875	201.26	199.118	202.828	206.168	55.8129	231.808
evm.TU.scaffold0005.1051	98.4712	93.1433	70.4814	133.053	93.6631	87.6216	139.002	94.9197	133.424	124.099	82.2069	96.7525
evm.TU.scaffold0001.2049	68.6783	79.7638	73.3532	66.6045	68.4124	49.7199	78.6931	93.952	78.9824	89.0691	76.6469	93.9644
evm.TU.scaffold0005.1041	42.5324	54.636	45.6283	67.8685	45.3823	39.9243	106.477	76.9918	27.2174	86.4834	55.4657	179.731
evm.TU.scaffold0001.1958	74.2276	84.5958	80.7082	69.1853	69.8029	63.9004	94.4557	74.2885	84.8933	87.5619	76.5272	78.1445
evm.TU.scaffold0005.67	103.656	103.388	108.107	99.2314	89.0702	81.7325	87.087	80.5525	99.557	102.238	122.194	79.2423
evm.TU.scaffold0004.646	76.1339	67.0806	67.792	69.8354	84.6895	99.2384	103.505	112.213	105.47	115.198	118.55	111.227
evm.TU.scaffold0008.596	54.9889	61.0818	66.8378	72.896	51.3849	43.7179	111.164	162.217	111.665	120.615	80.7498	144.464
evm.TU.scaffold0007.1372	134.957	187.901	176.683	147.418	212.272	178.909	0	0	0	0	0	0
evm.TU.scaffold0008.770	75.5692	74.6916	76.1765	74.2807	70.1673	61.7381	104.626	100.612	93.6079	103.235	90.3178	113.505
evm.TU.scaffold0007.1247	64.399	62.3332	56.2052	57.3946	51.1186	41.8412	80.5396	87.7008	94.9527	73.8426	71.3469	80.8944
evm.TU.scaffold0001.283	97.5169	77.9016	89.0894	85.5513	77.3019	75.4636	109.091	84.0363	115.924	81.9369	137.143	103.447
evm.TU.scaffold0001.1560	67.161	64.2473	54.4083	78.7642	59.0433	66.6316	64.4844	162.004	94.2358	139.661	147.444	142.479
evm.TU.scaffold0005.890	86.7609	76.1993	72.9207	82.9291	90.664	93.5368	79.3511	117.435	107.177	94.5959	102.567	79.6562
evm.TU.scaffold0009.291	90.1796	83.3532	79.9458	96.6728	98.7896	122.167	75.7368	105.77	71.8888	109.22	68.3837	87.5481
evm.TU.scaffold0004.973	52.3388	69.2971	63.258	67.2167	61.2078	69.6096	71.7706	70.64	76.1556	81.28	84.2128	90.8192
evm.TU.scaffold0007.1216	155.658	178.652	187.456	153.144	173.247	129.395	2.23453	2.94465	4.27998	4.3996	22.7422	4.11219
evm.TU.scaffold0004.463	64.5663	74.1503	67.2869	77.3975	66.3766	60.4837	94.2091	72.7157	93.7693	85.1213	79.7099	102.624
evm.TU.scaffold0007.908	88.3003	135.873	118.603	105.033	91.2841	74.3226	20.6529	9.07088	19.5124	24.6831	56.0472	26.4826
evm.TU.scaffold0005.1693	109.701	107.239	97.5495	103.645	86.8168	77.6623	89.3171	63.7258	81.5451	88.7401	134.458	88.8496
evm.TU.scaffold0006.377	29.799	25.1456	26.2654	20.6459	33.1992	28.1413	152.839	138.831	128.553	234.892	204.765	133.185
evm.TU.scaffold0008.283	100.157	110.077	132.456	111.284	126.164	104.486	69.968	71.6711	73.8782	69.0915	58.318	58.3104
gene_14632	61.1658	64.9254	58.6357	52.3785	52.2143	61.1107	94.0807	101.594	98.8761	102.188	84.944	87.4656
evm.TU.scaffold0012.42	74.064	85.3514	82.8982	77.2192	79.6894	74.709	119.296	109.301	99.5764	129.701	108.948	125.711
evm.TU.scaffold0006.933	55.0073	60.0816	57.3077	48.4643	50.2371	61.6312	115.452	112.169	127	142.541	233.323	166.526
evm.TU.scaffold0002.1192	37.1287	38.823	46.907	71.7624	65.1564	60.7886	179.611	241.519	138.138	142.331	69.9019	143.185
evm.TU.scaffold0004.1234	90.3928	94.4927	81.0481	78.7375	74.4424	72.6424	82.9459	139.533	111.714	134.126	55.1016	160.491
evm.TU.scaffold0003.106	78.9479	76.6198	77.8882	73.8231	83.5419	91.2124	98.605	117.804	95.3423	116.752	85.3594	113.169
evm.TU.scaffold0005.26	65.0609	71.4312	61.8951	60.2299	49.4656	77.4445	19.5278	16.6787	37.754	26.2526	103.665	42.2163
evm.TU.scaffold0003.631	86.2661	89.6668	97.7869	52.2329	69.6106	60.0985	113.431	83.7676	108.788	92.7225	109.706	82.3698
evm.TU.scaffold0005.1804	69.8392	68.4088	65.8156	66.017	52.647	61.5495	91.9977	83.5816	140.108	99.4782	55.0607	89.5898
evm.TU.scaffold0010.1404	65.3905	65.8193	71.1114	64.1449	56.6672	72.8025	99.3841	91.2492	100.571	93.7493	57.5283	98.3709
evm.TU.scaffold0007.799	120.408	152.992	181.169	75.1946	146.568	104.463	0	0	189.736	0	0.128625	0
evm.TU.scaffold0006.1174	116.921	141.302	139.874	115.811	123.112	120.461	56.8854	46.4389	50.7409	67.703	53.299	45.349
evm.TU.scaffold0007.2665	42.9917	35.7617	35.7999	33.8794	36.2674	38.9833	214.763	118.505	133.317	103.666	126.355	277.582
evm.TU.scaffold0013.124	59.1755	59.5365	67.7911	59.9374	62.8545	58.394	110.769	88.299	90.1996	87.7437	56.113	96.1458
evm.TU.scaffold0004.1688	63.2094	60.5352	62.6939	67.4309	69.2075	70.9434	128.514	155.163	131.001	131.452	106.04	93.1699
evm.TU.scaffold0002.2096	82.0096	74.7718	84.2382	84.2482	69.0599	55.189	127.666	97.4388	101.753	104.059	97.4148	106.482
evm.TU.scaffold0009.17	70.0784	62.233	67.0568	78.7233	39.1285	42.825	129.493	155.025	126.423	129.526	72.3106	112.775
evm.TU.scaffold0005.1461	88.9993	87.7796	95.0501	92.0927	104.64	115.27	59.9621	70.0379	59.0001	54.9757	61.1918	63.0315
evm.TU.scaffold0004.1694	48.2856	40.3348	44.2786	60.3736	87.9575	35.4566	193.402	226.556	148.16	174.476	52.2881	123.907
evm.TU.scaffold0015.502	57.8644	60.642	63.2027	60.3408	74.6883	65.9099	137.107	134.931	101.877	140.584	97.6969	117.058
evm.TU.scaffold0010.899	93.2317	91.2343	89.8688	100.195	60.1234	38.9954	127.83	94.2186	106.165	134.602	106.377	147.681
evm.TU.scaffold0009.1144	100.944	111.554	101.517	97.1056	123.94	129.843	46.6426	57.2186	56.1769	58.1398	49.2502	56.0417
evm.TU.scaffold0002.2049	86.1583	104.227	94.0558	109.132	80.1308	68.4387	115.947	76.3306	120.88	87.5325	94.0451	122.067
evm.TU.scaffold0001.1283	104.948	126.599	128.783	95.6161	86.054	58.0911	13.9747	10.6083	17.256	15.9298	52.0768	11.7856
novel.401	90.5629	74.3631	71.3393	85.1837	79.4234	69.3544	116.108	164.813	110.758	98.901	68.1064	113.751
evm.TU.scaffold0005.1513	73.9497	67.901	66.0833	74.2061	78.0402	85.2063	71.6273	83.9674	80.1294	74.4039	73.3914	76.9833
evm.TU.scaffold0015.454	86.4965	88.8939	97.4855	98.221	85.1574	76.5736	73.8786	92.228	72.0099	66.0382	83.6475	78.8483
evm.TU.scaffold0014.581	55.8141	66.0452	68.5066	63.1242	56.2638	44.7838	86.8775	87.7915	86.862	85.7205	73.4811	95.3331
evm.TU.scaffold0004.1177	107.455	91.9391	91.9232	46.7797	67.6008	71.9717	75.288	91.5831	92.0241	47.7648	96.0969	81.9858
evm.TU.scaffold0006.694	155.073	112.51	91.3504	82.9055	67.4626	42.5812	4.20284	4.07118	158.266	2.11922	1.38247	1.34298
evm.TU.scaffold0009.406	91.42	84.3283	82.4327	66.2345	75.5284	61.728	92.3133	94.2546	76.6306	85.7521	72.0534	81.5816
evm.TU.scaffold0005.484	121.285	143.63	134.668	104.488	129.004	142.277	53.4882	71.1401	38.2644	77.1373	45.185	49.3345
evm.TU.scaffold0008.571	85.4965	89.2358	98.7151	97.2581	95.3775	103.064	69.7215	78.9922	64.4651	68.7092	59.2211	68.0045
evm.TU.scaffold0005.1642	47.5227	58.8641	54.4064	62.6966	42.6351	29.5996	101.723	100.447	99.509	81.295	70.6965	90.1668
evm.TU.scaffold0001.1120	106.608	96.2074	104.387	102.69	143.275	155.591	62.1114	79.8722	64.8554	69.7554	82.2342	65.3989
evm.TU.scaffold0014.535	61.8336	77.2041	76.0154	82.9954	68.1441	73.1328	119.115	99.4225	111.847	91.7318	76.9244	117.459
evm.TU.scaffold0007.1703	31.3864	30.7381	38.651	33.6248	23.1716	28.2172	130.909	67.5276	174.871	137.181	185.869	100.342
evm.TU.scaffold0004.442	61.5918	60.4174	59.069	69.18	65.6831	63.4187	118.011	144.058	124.178	133.218	87.112	140.934
evm.TU.scaffold0006.738	104.661	104.523	106.334	107.025	115.295	120.57	67.3521	66.5248	56.6572	63.9328	66.0006	61.4572
evm.TU.scaffold0010.867	45.335	41.0481	50.362	58.2897	59.8633	67.9405	101.965	124.377	119.302	105.255	65.3976	118.803
evm.TU.scaffold0002.1137	97.8307	97.8806	81.4824	115.825	114.347	111.795	74.3449	75.8759	73.3708	94.8991	85.8148	90.6012
evm.TU.scaffold0004.183	126.581	164.583	148.658	153.108	148.638	107.592	25.27	27.0711	20.3878	22.4784	21.8652	26.9673
evm.TU.scaffold0010.520	68.223	64.9519	63.618	66.0288	62.959	65.5103	77.1241	68.483	75.7272	70.9447	73.4626	72.8742
evm.TU.scaffold0005.868	101.374	100.547	99.3976	100.043	110.363	128.879	71.6937	81.5101	66.5628	68.5938	69.2402	79.2118
evm.TU.scaffold0008.1790	22.5982	40.4496	41.2575	59.6554	44.2402	60.4447	160.109	160.839	193.893	87.6094	106.692	144.122
evm.TU.scaffold0005.1691	15.8259	20.9909	18.8934	76.0836	30.4402	49.8011	188.091	251.18	133.628	121.613	74.7709	113.567
evm.TU.scaffold0010.1511	44.2056	41.206	41.8827	49.6845	50.1307	52.3855	155.081	156.025	96.2197	141.821	82.563	121.464
evm.TU.scaffold0008.1541	46.8536	48.3269	56.402	48.4197	40.2425	47.6922	143.551	164.001	109.724	118.251	77.5867	113.355
evm.TU.scaffold0005.1933	31.9069	52.6655	46.4795	66.2902	46.2032	48.9606	172.028	119.47	166.413	88.5673	117.661	145.492
evm.TU.scaffold0008.1720	93.032	84.1938	96.6817	82.939	76.4357	78.3267	80.2969	93.3572	109.719	69.0392	100.968	82.837
evm.TU.scaffold0007.604	29.5847	66.2688	48.6766	86.1275	42.3631	78.6746	133.465	34.1716	76.2585	57.037	87.0208	34.4521
evm.TU.scaffold0001.837	68.645	67.4036	67.3275	67.4133	76.8883	71.056	66.0726	71.6892	60.3777	58.5687	57.0411	65.8814
novel.451	55.2034	49.4272	50.8978	57.9181	56.1753	59.4839	87.8898	133.775	125.152	108.277	95.8567	122.315
evm.TU.scaffold0009.1474	58.3706	55.8808	60.6853	61.0349	49.0717	51.1836	144.257	95.1863	83.2039	104.384	154.547	133.432
evm.TU.scaffold0008.1449	84.623	81.2584	75.8938	71.7581	67.2089	86.1659	132.586	100.166	82.2958	125.981	164.189	114.077
evm.TU.scaffold0005.1507	118.402	114.153	117.312	106.291	111.13	96.4619	64.9094	68.0417	69.7035	80.5075	69.9467	58.7038
evm.TU.scaffold0012.64	62.7442	62.2614	64.4105	68.6915	63.596	58.8804	112.334	121.065	120.342	104.035	70.2103	116.24
evm.TU.scaffold0007.2282	87.7341	90.0782	88.6927	86.1759	82.4522	89.7668	66.8431	53.8536	62.6531	57.5114	69.3441	61.7404
evm.TU.scaffold0013.278	75.8329	91.9789	86.1546	75.1097	69.1182	76.8197	52.4237	75.6109	75.5499	54.5334	44.7771	53.1838
evm.TU.scaffold0004.755	96.1637	91.9729	89.5129	88.4689	98.3161	111.47	67.6094	88.1975	88.7476	91.2735	85.7214	89.3026
evm.TU.scaffold0007.2042	58.2531	62.9995	72.2864	69.5335	35.2582	22.9929	83.5116	75.9938	88.5222	72.91	58.3386	86.4938
evm.TU.scaffold0001.493	67.0609	92.7125	70.507	84.165	98.2038	94.3242	62.3876	70.7705	75.1756	117.01	57.0857	72.2443
evm.TU.scaffold0002.1315	71.9835	72.227	75.3888	68.1842	76.7277	90.0218	65.1562	61.4607	72.7387	53.2654	57.6272	71.6791
evm.TU.scaffold0015.508	39.5073	121.261	87.1335	28.5893	6.65715	36.969	139.836	26.0708	18.0944	16.3115	113.132	47.525
evm.TU.scaffold0008.328	55.6666	62.6126	60.0749	55.1146	38.8441	35.0178	80.9261	71.9716	80.9525	69.7717	82.1214	77.0981
evm.TU.scaffold0002.1233	192.828	136.26	124.959	151.913	144.333	76.4203	1.02778	0.17903	40.5393	2.19225	6.6005	2.9347
evm.TU.scaffold0001.843	99.7978	109.913	107.733	95.8466	89.4194	56.9111	53.4287	60.2453	68.307	69.1927	65.3869	91.7631
evm.TU.scaffold0001.839	92.814	100.331	104.333	89.5906	86.4142	68.7092	84.6205	107.879	107.653	150.133	68.2287	101.991
evm.TU.scaffold0007.2311	93.4146	113.114	113.595	110.114	112.298	94.3223	52.3769	44.4974	46.6816	47.5765	63.5797	47.4831
evm.TU.scaffold0003.660	98.9931	84.1438	87.8876	114.977	95.7424	95.7282	76.2661	82.9949	68.4734	75.0808	180.774	104.821
evm.TU.scaffold0011.1180	78.4941	73.2052	77.4402	71.5948	64.554	77.5019	102.023	71.1971	86.1228	114.771	80.3644	98.4256
evm.TU.scaffold0007.1695	67.4387	78.1583	79.4781	61.8644	55.1115	42.7722	129.263	90.2088	111.217	149.253	128.866	135.331
evm.TU.scaffold0003.366	60.0711	47.4139	50.6303	56.3759	56.1434	64.7698	51.7446	42.369	56.0517	60.9987	61.276	59.1223
evm.TU.scaffold0004.235	80.6462	78.7152	82.7263	70.1747	64.2466	57.0159	135.055	104.073	113.421	116.226	120.91	121.283
evm.TU.scaffold0015.237	104.004	101.976	106.396	92.1478	93.2768	77.0139	26.9375	19.8409	34.6701	36.4173	83.4858	30.8524
evm.TU.scaffold0001.1889	78.8954	80.6607	84.8675	65.8472	85.1512	84.3797	103.996	91.027	90.6333	110.324	72.3121	102.043
evm.TU.scaffold0014.768	46.0272	61.2402	73.4486	66.6711	48.2032	41.7248	136.695	69.4322	133.572	175.281	166.168	101.679
evm.TU.scaffold0010.1342	90.6862	82.1965	78.462	95.733	97.0798	98.8908	62.134	100.634	56.2085	68.8247	62.7862	67.5587
evm.TU.scaffold0008.816	51.5288	53.2678	66.6211	41.7887	29.6005	25.3162	186.695	152.062	73.8698	261.394	146.633	141.002
evm.TU.scaffold0011.939	57.0335	55.4918	59.7216	66.7058	43.9583	52.4781	123.986	156.653	118.98	118.262	49.1021	107.735
evm.TU.scaffold0009.1472	66.2947	64.6707	69.3102	67.7437	72.0553	65.9551	115.669	110.014	111.973	112.7	103.139	107.9
evm.TU.scaffold0002.1383	83.2245	102.191	100.316	99.7488	90.9632	93.7417	27.4836	20.4826	25.7191	28.9858	29.6218	20.6438
evm.TU.scaffold0001.1876	59.1953	58.3986	60.8781	60.2316	57.3443	52.6854	111.867	122.818	91.8288	87.4451	70.4735	103.101
evm.TU.scaffold0008.854	24.7651	36.8231	27.4437	24.5776	33.1946	41.1923	182.894	116.596	54.4872	72.6447	278.42	330.772
evm.TU.scaffold0009.50	71.6575	74.2925	79.2012	67.7376	53.4421	45.7025	114.719	106.292	105.675	133.42	87.8938	116.845
evm.TU.scaffold0004.1273	44.0224	51.3639	51.6054	52.5011	45.4491	51.4925	103.895	130.232	98.9927	110.436	63.7634	100.699
evm.TU.scaffold0008.641	79.0937	83.2469	90.8114	90.1559	85.0382	82.5968	84.9631	78.6199	73.1061	86.389	117.159	93.0226
evm.TU.scaffold0007.1066	102.153	101.695	99.4434	102.007	109.082	98.358	77.3251	76.6835	63.8452	79.4241	61.5242	68.9782
evm.TU.scaffold0006.871	242.086	167.351	168.452	171.999	224.098	184.544	2.59607	6.30439	2.42502	3.83359	1.32397	1.53898
evm.TU.scaffold0012.37	43.2313	52.8257	55.0198	43.1255	41.6589	50.1574	89.27	98.5401	77.0433	64.3199	70.572	91.7574
evm.TU.scaffold0013.215	62.9784	73.622	70.2908	79.4133	72.5896	66.4411	126.499	127.883	118.269	120.695	89.4042	104.502
evm.TU.scaffold0005.551	66.573	66.7622	62.1951	58.5047	86.348	92.6317	117.284	125.521	94.7651	131.934	195.533	79.9798
evm.TU.scaffold0011.316	101.785	80.1219	89.1305	84.1852	108	87.5816	100.705	144.159	94.3553	91.5141	58.4553	111.898
evm.TU.scaffold0007.257	65.1438	64.5498	68.4739	81.8471	86.7333	101.481	98.6508	145.161	105.527	99.072	78.9969	92.416
evm.TU.scaffold0008.1293	62.532	66.176	65.2624	70.0046	61.4988	53.9818	77.2196	79.2148	75.9147	66.4512	69.0611	81.5048
evm.TU.scaffold0002.2065	68.6637	74.4055	79.3354	79.1476	63.9086	52.791	89.127	87.3944	92.0294	112.388	73.6057	108.996
evm.TU.scaffold0009.1414	62.3602	63.7398	66.0151	63.6787	64.186	56.4685	121.134	159.259	86.6309	99.2952	47.8348	77.3446
evm.TU.scaffold0003.338	125.051	117.637	142.513	102.694	113.689	84.8662	8.70015	8.05564	13.7162	16.7141	51.0792	10.215
evm.TU.scaffold0007.861	71.2712	64.594	64.0769	68.2061	77.9996	77.6424	103.392	145.274	113.404	148.58	90.6807	109.13
evm.TU.scaffold0011.53	66.1511	73.1398	68.0457	74.3321	69.403	65.5703	109.694	160.519	100.188	105.06	67.2977	110.07
evm.TU.scaffold0008.503	67.4522	74.1795	78.181	73.9861	57.6953	41.005	113.932	108.933	97.8091	136.551	118.113	120.862
evm.TU.scaffold0007.1809	54.9136	63.6328	60.2692	48.5111	48.4641	43.6505	113.522	112.987	96.1908	98.3773	87.887	94.4104
evm.TU.scaffold0006.1207	76.6267	75.1278	72.9278	77.5988	59.4545	47.1279	111.763	146.185	131.578	181.189	136.598	123.914
evm.TU.scaffold0013.425	116.518	92.2512	108.362	75.7877	76.9912	63.3396	40.9536	41.9086	59.7043	78.95	146.268	38.7938
evm.TU.scaffold0011.658	15.8336	12.1039	12.2617	9.91714	15.0169	25.2873	199.304	362.537	149.785	189.208	46.781	119.373
evm.TU.scaffold0007.2156	19.9153	17.5061	16.3515	14.8092	16.7949	17.6064	144.096	208.879	197.08	355.928	86.5841	171.457
evm.TU.scaffold0014.576	49.512	73.139	51.4444	79.4624	58.4841	68.0776	31.7327	28.2992	35.2891	39.8282	39.4517	35.2596
evm.TU.scaffold0014.190	69.196	74.9823	79.3823	76.4857	60.0434	80.8343	76.4966	57.8005	70.7203	76.1025	59.1077	86.8554
evm.TU.scaffold0004.229	68.9348	74.2873	75.0718	68.5184	57.9103	50.8922	108.209	85.1331	82.1058	89.1256	77.8344	86.7234
evm.TU.scaffold0010.687	42.8354	48.4518	42.091	49.7696	39.827	47.1734	76.2977	45.219	81.6182	97.4287	142.256	86.0296
evm.TU.scaffold0007.72	57.3359	57.6878	56.6974	54.8525	53.6066	45.2939	113.272	105.477	118.87	123.925	96.9695	155.833
evm.TU.scaffold0006.512	65.3368	58.5785	65.2914	55.6842	30.5253	25.8621	8.10218	12.1676	19.9057	22.1477	56.9079	32.4231
evm.TU.scaffold0005.1039	42.575	54.7313	47.1599	65.9604	45.9543	34.7264	93.2128	78.4812	27.102	65.9266	61.1998	195.013
evm.TU.scaffold0014.690	80.0253	87.1628	77.5599	90.0901	97.8112	91.874	95.6039	94.3889	89.8464	107.07	73.1163	102.11
evm.TU.scaffold0009.858	43.6763	49.7977	49.1135	56.7402	45.1149	35.1249	99.3613	92.6206	87.0832	73.5639	72.3213	98.7224
evm.TU.scaffold0008.1675	107.524	93.4648	108.326	83.2536	100.053	99.1245	70.7321	89.1621	60.849	72.9402	77.2684	63.4226
evm.TU.scaffold0007.1255	40.348	48.8744	51.173	47.34	44.1369	47.9715	98.6569	56.8991	72.9446	83.7947	76.8874	69.3682
evm.TU.scaffold0006.162	67.689	63.2177	65.7597	56.4583	54.8982	70.3712	94.6582	96.643	96.1055	101.811	56.1413	80.8035
evm.TU.scaffold0012.41	58.6141	69.6908	68.4333	81.3147	75.1939	70.9104	115.598	108.486	103.783	105.39	83.7556	113.217
evm.TU.scaffold0006.1061	102.569	97.5465	83.867	93.021	120.257	135.672	60.4794	71.0038	73.7453	82.4966	80.4203	69.8663
evm.TU.scaffold0002.1836	86.5876	81.7486	67.9094	96.695	64.0274	55.0979	82.6148	76.7284	134.308	168.872	77.6734	84.6102
evm.TU.scaffold0008.52	22.2592	27.9826	25.2343	46.1358	38.4034	25.8266	182.26	193.618	158.851	246.199	65.4637	201.914
evm.TU.scaffold0012.925	92.7799	80.6344	79.6852	85.4604	95.5832	127.684	66.4985	63.3045	70.3825	60.9522	68.4748	76.6248
evm.TU.scaffold0004.257	91.5446	94.6051	103.69	76.224	94.1575	73.104	95.048	66.9087	82.2917	83.9898	81.8206	75.5346
evm.TU.scaffold0001.1043	77.7504	73.3423	46.4224	115.635	63.0916	46.9743	83.7557	153.761	43.8369	120.454	67.5282	224.047
evm.TU.scaffold0003.1010	39.8792	37.9678	34.6365	45.2838	47.389	45.228	187.845	158.85	175.65	97.2081	164.985	99.7834
evm.TU.scaffold0009.340	75.5402	72.4848	72.8137	80.7049	98.24	96.0586	96.42	102.696	83.2304	114.757	98.1119	98.5611
evm.TU.scaffold0011.873	117.511	119.037	114.78	98.0074	98.1003	118.489	54.5131	62.4168	59.6984	90.2651	79.4366	55.203
evm.TU.scaffold0001.1026	50.4853	39.1447	55.0267	34.0162	44.6525	42.567	88.0829	95.2442	89.1065	83.9871	64.0389	106.913
evm.TU.scaffold0007.1450	43.7567	42.9945	44.1912	43.8969	34.134	35.412	110.765	74.7227	85.7731	90.3465	80.3087	101.841
evm.TU.scaffold0015.593	88.4879	96.8293	78.871	106.847	94.8325	119.114	69.7315	74.7565	60.9135	72.6743	86.2971	78.719
evm.TU.scaffold0008.288	35.2903	35.1933	35.9732	44.8655	34.6765	28.3695	178.265	239.247	153.401	229.287	63.7011	168.869
evm.TU.scaffold0002.2073	84.063	89.5958	92.3065	83.1649	77.9312	57.1997	66.4681	71.0069	60.9532	61.2155	60.9484	60.6672
evm.TU.scaffold0013.248	46.4816	66.936	76.6195	59.2095	55.9863	34.4791	51.8274	31.0817	40.7081	72.6455	28.648	46.5101
evm.TU.scaffold0014.708	67.6488	70.7916	70.7952	53.6359	17.5878	12.8292	103.644	50.2117	111.864	95.7495	78.1584	104.789
evm.TU.scaffold0007.246	50.5694	44.6834	65.8993	59.2549	32.8319	22.0457	150.76	40.5335	162.103	102.709	149.439	125.877
evm.TU.scaffold0001.1906	100.815	97.0883	105.376	90.9408	110.698	116.213	51.8958	80.3953	66.4444	70.1673	51.7099	59.4886
evm.TU.scaffold0002.1405	45.6248	47.8263	60.6405	48.1686	42.7588	53.2127	161.282	179.01	119.47	121.359	106.866	154.205
evm.TU.scaffold0001.846	120.213	104.943	125.216	93.4771	97.9184	76.5009	13.4212	23.285	19.8001	30.1247	66.4541	25.9692
evm.TU.scaffold0003.622	44.5985	41.3274	36.0656	66.0411	62.7894	67.2978	113.792	70.2633	79.5316	75.6089	54.4768	343.684
evm.TU.scaffold0013.52	60.6654	71.2811	67.2179	77.3212	67.3219	70.1887	92.9896	88.5625	92.212	79.8725	83.7183	101.523
evm.TU.scaffold0007.1378	60.8537	60.12	74.4913	53.9175	58.7256	58.2007	138.369	117.306	106.415	139.056	84.1139	103.553
evm.TU.scaffold0014.156	65.7961	58.1065	58.5028	55.5709	70.9417	75.7753	95.7645	87.4383	111.661	98.2867	132.917	96.6882
evm.TU.scaffold0011.1215	97.81	110.641	112.801	98.9944	89.4631	71.7838	42.3302	45.1596	46.3952	57.2405	66.5517	38.2327
evm.TU.scaffold0002.1313	73.3572	72.1457	77.2681	71.8565	72.9513	81.3317	73.3044	88.8946	70.1079	81.6952	60.711	71.9236
evm.TU.scaffold0002.1954	53.2486	64.581	69.5637	62.4804	50.2347	42.6471	98.7614	46.7619	67.6078	70.1209	100.904	107.372
evm.TU.scaffold0008.732	40.8845	41.889	49.5852	45.784	46.4049	27.2049	68.9534	102.219	60.0345	84.4986	82.9144	67.1374
evm.TU.scaffold0010.871	72.8164	74.6378	74.5177	74.5049	75.0779	89.4704	69.729	106.757	79.4176	79.3072	57.8098	68.1783
evm.TU.scaffold0001.289	72.4424	82.5085	88.9635	90.0621	117.385	115.576	55.952	68.5141	67.161	55.446	49.2744	63.4591
evm.TU.scaffold0005.1016	71.6556	78.7228	73.3473	116.608	96.6541	116.377	60.3171	72.3391	83.9129	75.2228	72.7249	64.3466
evm.TU.scaffold0011.463	75.1712	68.2126	65.6994	73.4295	72.6983	65.2119	98.0101	98.4167	116.859	83.2058	62.4448	86.9444
evm.TU.scaffold0005.259	89.7562	97.6923	90.8441	95.9258	106.899	115.308	55.8147	79.0316	62.7431	82.096	81.5338	65.4883
evm.TU.scaffold0010.1422	102.205	106.756	82.0995	91.1957	96.9306	119.288	57.6588	39.582	38.3835	69.0328	136.383	97.5043
evm.TU.scaffold0002.1174	58.8367	60.7411	61.692	54.1152	29.6273	21.6286	88.4323	77.7153	97.0881	95.602	61.9139	92.1935
evm.TU.scaffold0001.575	81.076	74.7014	77.4278	82.142	93.4702	79.2389	87.7039	108.134	93.0122	73.0749	66.775	75.957
evm.TU.scaffold0002.418	77.3656	83.7274	83.3958	65.294	79.0341	84.7334	67.5433	74.7547	99.0121	101.173	60.6392	77.3299
evm.TU.scaffold0015.534	54.43	56.6238	57.1946	58.2038	42.8062	29.2046	117.307	124.651	121.616	130.643	71.7396	117.373
evm.TU.scaffold0005.1839	63.1868	57.4669	61.673	62.4036	56.5828	63.8505	124.276	128.054	104.005	142.433	130.702	111.937
evm.TU.scaffold0007.1569	61.131	46.4681	57.8571	44.5077	31.6215	15.856	199.451	155.252	95.5861	62.2737	72.834	88.4748
evm.TU.scaffold0001.1284	54.6021	60.7411	56.485	58.1481	39.8799	24.2503	96.8298	86.0507	93.8679	88.8129	80.6688	108.93
evm.TU.scaffold0010.443	61.0472	68.5023	62.6255	64.1887	68.7012	71.7165	108.837	109.237	104.552	115.771	79.0496	104.834
evm.TU.scaffold0004.1004	72.3032	68.8346	75.1544	63.0725	83.7003	66.4375	82.6092	104.679	79.7011	86.1898	75.3067	85.1034
evm.TU.scaffold0011.355	89.92	135.151	110.139	106.552	100.846	63.0102	74.952	30.2869	61.8329	52.2301	85.1105	54.1262
evm.TU.scaffold0007.1814	66.5593	65.1087	64.3727	58.6042	59.133	57.2338	85.981	56.7003	55.752	59.7541	72.6649	69.5225
evm.TU.scaffold0007.1429	58.1096	62.3627	62.0761	53.632	42.1124	40.0563	122.979	89.4129	112.179	113.057	75.6936	101.913
evm.TU.scaffold0009.1019	72.7729	74.3359	72.258	74.2283	82.9013	79.2936	59.808	79.6845	66.9521	73.0905	60.3455	64.625
evm.TU.scaffold0001.213	95.0283	115.252	108.734	104.242	88.2072	66.5328	25.3695	9.07088	18.4674	23.0035	79.1044	89.484
evm.TU.scaffold0011.240	74.8505	88.8778	82.6166	66.0128	74.4014	55.9701	49.7671	33.8723	58.753	51.4812	60.2177	68.976
evm.TU.scaffold0009.727	142.99	157.872	106.685	137.375	140.065	176.447	38.8017	32.9955	27.3479	52.1009	56.3963	30.7659
evm.TU.scaffold0001.1156	76.9321	66.4837	66.0107	85.5984	102.064	122.728	68.6021	99.7402	77.4741	82.3581	69.3569	75.7528
evm.TU.scaffold0007.2097	33.1581	45.1996	47.1669	30.9507	22.0401	16.4313	130.672	80.8749	135.994	123.85	68.0962	154.495
evm.TU.scaffold0012.806	56.2498	71.3694	61.6859	60.9467	55.8531	40.3293	97.2146	104.118	110.035	94.7285	106.462	140.04
evm.TU.scaffold0001.1394	52.8367	50.6771	51.5556	55.9024	55.4802	65.0139	116.981	118.181	101.62	101.065	83.8452	146.692
evm.TU.scaffold0003.795	73.2642	82.0994	60.1563	59.79	35.9677	23.1691	108.129	50.092	75.0983	84.734	70.6127	91.4211
evm.TU.scaffold0011.28	62.2567	62.0074	68.9491	57.3244	40.6205	34.698	117.424	110.356	105.752	119.044	74.056	100.914
evm.TU.scaffold0002.1243	90.1511	99.3276	100.675	100.885	112.46	127.606	48.0363	83.9662	69.0417	82.5172	59.9551	69.5983
evm.TU.scaffold0012.726	58.3895	56.6758	57.4979	50.6957	48.5241	44.9962	130.185	83.5255	94.0571	86.8243	71.3312	94.6449
evm.TU.scaffold0007.1057	79.1608	81.8513	77.4622	83.8503	84.8721	73.7593	89.1964	82.3923	72.3136	77.1511	79.8647	79.6024
evm.TU.scaffold0004.791	99.6272	85.572	82.3043	82.0249	103.291	118.351	41.7804	61.2962	50.3373	44.7077	55.0802	54.31
evm.TU.scaffold0001.2116	110.319	94.0891	85.3218	122.762	121.774	138.374	82.0696	109.954	101.564	59.1451	51.1806	69.4111
evm.TU.scaffold0005.1634	83.7559	86.1553	94.7951	84.6502	83.5497	70.7496	101.747	72.9193	93.6869	65.8231	83.2816	74.4519
evm.TU.scaffold0001.1967	82.4122	87.1385	81.35	85.4104	104.551	107.065	58.5138	85.5855	66.2598	65.8945	51.3866	63.9924
evm.TU.scaffold0013.362	95.5842	99.002	111.215	57.8703	75.2865	65.0498	52.0742	79.0637	58.2168	85.5569	74.3983	67.904
evm.TU.scaffold0003.709	20.3766	12.6244	14.2826	23.3657	38.5854	23.6543	162.502	291.062	134.687	294.36	34.5984	90.0452
evm.TU.scaffold0003.1284	97.7515	121.261	98.0809	108.501	102.882	91.1766	43.7159	43.6156	50.8862	53.2776	44.4871	36.6022
evm.TU.scaffold0004.1553	46.4239	42.4893	50.2592	44.0999	43.0044	48.1413	119.899	179.738	156.824	148.542	92.5863	150.117
evm.TU.scaffold0004.737	69.574	60.7657	63.0713	62.2691	79.2175	99.388	88.1058	136.331	84.7515	97.6858	75.9369	90.8575
evm.TU.scaffold0002.2085	54.2644	54.5224	58.5557	60.8083	42.3757	30.197	101.992	87.6177	100.924	95.1012	75.4853	113.9
evm.TU.scaffold0002.1490	71.6394	80.3305	74.0945	81.207	55.4416	40.6698	110.386	125.669	119.575	143.381	56.8697	115.71
evm.TU.scaffold0009.1419	59.2196	59.2642	66.2923	59.2294	60.5982	57.1432	105.022	143.194	103.066	108.656	92.5979	129.658
evm.TU.scaffold0007.2666	69.7447	85.6735	89.9308	72.6922	43.2715	38.4065	92.1211	87.854	95.462	108.255	105.548	96.9669
evm.TU.scaffold0001.1677	68.8958	76.5375	73.0293	72.9706	91.7305	102.248	63.9507	83.9189	51.0625	59.5092	65.1738	68.1311
evm.TU.scaffold0008.929	57.4984	64.1449	65.3023	63.9235	59.1462	48.4288	90.2824	136.063	87.0495	99.7238	101.441	104.726
evm.TU.scaffold0002.1748	66.4287	67.7954	67.9443	65.4439	61.222	44.6365	108.083	120.438	114.762	107.248	75.039	103.373
evm.TU.scaffold0005.837	80.3189	89.7269	92.186	111.274	88.7912	94.9194	49.4077	52.3351	51.864	55.7428	58.5496	58.5256
evm.TU.scaffold0001.883	77.6443	78.3384	77.6629	81.0332	89.372	71.1503	87.5144	89.1612	84.6763	67.9275	92.0502	91.5611
evm.TU.scaffold0001.736	61.9277	49.4695	50.2391	77.9617	84.4626	92.1045	116.917	118.27	101.058	93.7802	86.0984	117.952
evm.TU.scaffold0001.105	55.8677	47.7393	46.2454	66.9324	43.572	60.9625	87.1519	80.882	70.0224	107.158	62.008	119.536
evm.TU.scaffold0004.200	67.9783	48.844	48.3523	61.9575	79.8587	95.8182	81.2865	88.9388	93.9777	120.174	173.942	112.283
evm.TU.scaffold0007.2333	90.1306	85.2201	81.1416	83.2502	87.9485	91.9936	72.8555	89.0882	125.64	88.6133	63.1994	85.3551
evm.TU.scaffold0001.1505	64.1423	70.8856	72.8716	64.2505	67.9668	78.1398	65.4872	52.0888	66.4186	56.702	75.7524	67.7196
evm.TU.scaffold0004.1675	77.0364	82.9497	81.4776	69.798	85.9975	101.96	73.6624	79.5798	79.5026	103.822	95.0583	83.8641
evm.TU.scaffold0008.920	89.8739	97.0711	102.837	100.331	99.9549	100.156	16.871	27.6291	50.0841	67.089	46.3887	37.6861
evm.TU.scaffold0001.335	49.3873	52.3997	52.8483	53.4029	60.4227	68.2535	131.795	136.558	105.925	101.877	79.8972	104.863
evm.TU.scaffold0003.55	67.3545	60.2704	52.3893	57.7135	57.621	58.4451	153.717	116.269	118.893	133.976	118.428	118.094
evm.TU.scaffold0002.1435	44.1784	55.58	46.7878	50.6172	52.0427	37.7955	114.235	94.3861	93.4834	92.1382	67.7889	90.0659
evm.TU.scaffold0005.821	55.6839	62.9355	60.51	69.1494	53.91	62.5684	105.875	107.948	90.7841	97.2899	88.6874	103.219
evm.TU.scaffold0002.1651	65.6006	66.5284	68.9234	63.1966	57.1352	36.7286	116.788	91.1491	94.5286	130.651	93.9962	109.035
evm.TU.scaffold0013.660	72.3286	78.24	74.7619	70.2641	89.5747	98.3141	72.8873	67.3383	76.4576	70.2851	70.6926	73.538
evm.TU.scaffold0011.261	70.5121	66.7049	66.0491	63.9409	77.6878	80.5785	105.137	90.9958	89.9303	102.043	109.905	114.037
evm.TU.scaffold0006.383	61.1327	61.8976	53.7454	54.3923	54.5271	54.6683	55.8368	85.2557	58.5929	62.0809	42.0448	65.5234
evm.TU.scaffold0002.327	68.2876	54.8034	63.357	63.2031	70.6505	90.4756	99.4143	132.996	108.35	135.153	90.0212	100.283
evm.TU.scaffold0006.680	58.4614	61.1975	54.3477	86.1291	70.1576	61.4474	108.202	93.5746	132.032	130.251	71.5477	136.629
novel.1348	54.7394	58.0066	55.2956	72.821	72.923	87.7883	76.6398	133.03	98.6187	79.5531	47.6438	73.57
evm.TU.scaffold0001.873	53.525	52.9454	55.4662	54.1526	49.1721	43.7935	125.196	111.993	90.1189	114.811	85.907	98.6406
evm.TU.scaffold0007.2024	50.157	43.0594	57.0141	47.559	46.8994	46.1347	98.1948	67.9486	203.48	60.877	200.579	92.8789
evm.TU.scaffold0011.923	28.3791	26.7733	34.2123	28.7485	21.6357	21.0075	147.14	191.991	119.961	231.959	72.6937	136.767
evm.TU.scaffold0005.664	43.454	49.2151	47.3137	48.8808	53.6849	59.6059	84.073	95.6257	79.0284	81.8681	66.3381	92.2067
evm.TU.scaffold0003.326	74.371	79.9576	83.2336	83.6853	90.4306	101.595	62.3975	97.6891	68.3552	95.7712	53.1031	75.2853
evm.TU.scaffold0013.83	75.8102	76.6465	86.4054	69.7385	54.5979	41.4535	94.4679	118.503	93.8192	130.791	80.8194	100.922
evm.TU.scaffold0010.33	80.8442	68.2729	71.3038	55.812	55.7654	53.7947	93.1468	101.472	97.7778	146.213	126.999	78.1647
evm.TU.scaffold0010.1051	54.2194	41.0553	51.5247	26.6187	28.1732	38.0328	128.874	62.8436	127.331	121.708	161.318	115.53
evm.TU.scaffold0008.1061	73.6732	74.3631	79.2375	72.6851	67.9772	61.6908	91.2178	51.3914	70.3829	68.4975	92.8708	78.2758
evm.TU.scaffold0010.979	61.3658	58.6927	52.1728	55.7205	72.1813	73.7961	58.5834	81.6379	73.8167	52.8116	59.2452	70.1233
evm.TU.scaffold0008.136	89.4302	83.7542	86.7812	101.365	103.878	120.268	65.7529	79.43	57.8414	76.2734	62.9337	74.3546
evm.TU.scaffold0001.659	57.1264	52.5673	62.7177	50.4324	56.5604	64.7495	83.0015	75.6981	63.9122	62.9751	53.6014	87.7764
evm.TU.scaffold0015.802	45.0732	38.7238	44.5645	38.0243	49.4026	55.3726	133.946	199.09	132.213	131.165	54.1277	111.751
evm.TU.scaffold0013.539	57.5399	77.7036	66.1676	65.3836	71.3313	81.2419	61.9201	56.2547	59.4028	50.8341	59.6485	69.017
evm.TU.scaffold0007.1386	40.8532	37.9135	42.3229	33.9506	33.3307	40.8541	120.646	134.837	75.4596	134.551	122.02	96.1334
evm.TU.scaffold0011.1227	72.1432	81.0312	72.2958	74.7167	92.201	88.1466	72.33	73.8053	71.7335	66.6528	81.6812	75.4822
evm.TU.scaffold0002.1502	71.0765	68.1119	66.0391	63.78	62.3935	57.7579	127.701	71.8142	101.609	113.378	119.061	110.403
evm.TU.scaffold0005.1874	53.7265	49.5101	48.5872	42.4291	53.9183	49.1236	152.157	141.495	120.935	135.659	118.866	130.006
evm.TU.scaffold0004.530	74.4493	85.0926	80.0396	80.849	88.8658	90.1575	44.6464	72.0383	55.3142	57.7909	45.9322	57.3088
evm.TU.scaffold0012.796	72.8021	69.0425	69.3087	66.7017	84.0229	87.3562	74.5608	113.18	84.5725	100.272	94.6272	87.3662
evm.TU.scaffold0007.790	71.3688	69.0234	70.4099	63.7408	78.5951	87.6598	65.7569	97.1185	69.7502	69.1814	61.1051	73.7656
evm.TU.scaffold0006.1010	61.0218	63.8776	61.8297	69.3317	67.0259	79.2992	115.969	126.777	105.039	123.599	64.8259	116.405
evm.TU.scaffold0006.863	45.4686	37.165	45.1626	43.7527	28.5435	18.4068	128.774	99.3425	118.431	115.346	224.679	161.39
evm.TU.scaffold0002.795	51.0719	51.1178	64.0805	42.253	40.2425	18.4302	71.8624	69.1201	50.9496	56.6477	70.4801	61.9257
evm.TU.scaffold0007.1100	51.4512	51.2804	53.7868	47.0385	43.6578	38.6128	111.123	101.399	86.9326	101.309	83.6063	99.7264
evm.TU.scaffold0011.775	135.059	244.644	159.37	175.746	226.515	139.354	0	0	0	0.12034	0	0
evm.TU.scaffold0011.392	87.7651	83.1564	83.3479	79.9761	90.1369	94.8259	59.4268	74.9477	73.4676	83.7099	69.996	75.0577
evm.TU.scaffold0007.1873	67.9368	77.8108	77.3059	80.9035	64.2457	58.1396	79.1649	66.0738	75.5398	79.6403	75.6742	73.8345
evm.TU.scaffold0003.914	85.8824	80.8802	80.1027	181.964	121.757	130.283	55.5565	51.4576	29.694	48.4696	88.0963	76.6134
evm.TU.scaffold0005.1621	75.3473	75.9192	76.1553	89.5405	91.5358	87.0952	68.4423	99.2503	71.3933	91.6512	72.7175	81.7119
evm.TU.scaffold0013.572	77.2447	87.2327	73.3899	74.3321	78.5771	78.0418	72.9038	80.0299	65.9605	76.5478	87.1026	74.0675
evm.TU.scaffold0010.620	37.6637	35.917	49.5386	39.4411	26.4282	37.6531	116.467	43.5987	40.8446	127.942	125.463	284.348
evm.TU.scaffold0014.562	59.3202	71.0989	77.7544	70.8447	68.7135	64.7797	83.5357	61.8583	81.2606	66.6918	90.2252	75.682
evm.TU.scaffold0011.899	68.2889	63.2775	55.0364	58.8117	74.3729	72.8266	100.894	110.381	82.7765	102.289	129.172	82.573
evm.TU.scaffold0005.2151	103.735	86.7277	93.0107	81.72	66.8636	55.0361	71.8328	61.1319	63.3773	74.943	100.505	69.2746
evm.TU.scaffold0009.1081	65.1525	62.5927	65.5849	63.6892	66.8986	72.9922	92.749	161.787	90.2445	115.091	68.6944	109.332
evm.TU.scaffold0002.1855	43.675	36.4693	46.3873	42.0787	42.9873	33.5681	150.579	208.854	112.789	106.149	57.2065	108.018
evm.TU.scaffold0001.766	102.991	102.57	87.8573	82.5634	112.779	133.934	60.3043	86.0169	78.1859	94.4275	47.2808	66.3532
evm.TU.scaffold0012.766	110.332	120.968	111.276	81.7295	58.5438	44.6966	44.4162	22.6772	32.9517	38.1973	64.426	41.1603
evm.TU.scaffold0002.519	63.4673	50.3958	47.6749	50.174	67.0363	73.3958	99.9243	168.776	119.4	157.067	57.7684	119.684
evm.TU.scaffold0010.341	55.5621	50.6292	52.1257	65.9862	57.6639	51.6637	105.903	90.5116	110.122	98.6849	136.26	86.3628
evm.TU.scaffold0005.626	73.1234	71.6811	74.3463	65.6261	81.9135	80.799	73.1085	126.081	97.9644	103.649	78.6411	91.7816
evm.TU.scaffold0003.922	57.5889	66.6082	66.0086	62.9401	51.5469	50.0651	86.9903	77.1233	84.9427	85.5202	69.6976	85.2487
evm.TU.scaffold0001.669	38.1618	35.8933	30.6351	46.5262	42.4689	46.1929	130.479	75.3614	135.14	112.659	198.066	114.143
evm.TU.scaffold0007.864	95.5316	94.9184	91.9881	99.1969	112.64	111.729	59.5396	83.0216	66.2736	78.5989	65.6806	67.3411
evm.TU.scaffold0004.130	99.108	81.216	89.5448	84.0886	92.1109	109.118	63.1983	77.3268	71.5354	59.8458	72.9802	58.6114
evm.TU.scaffold0007.1696	33.4864	46.1702	40.7404	47.9629	40.1245	33.7299	62.9624	52.6935	60.9892	56.1583	55.4082	66.6726
evm.TU.scaffold0008.995	51.1284	51.4115	46.9435	54.8148	51.6553	52.4412	86.0309	84.9261	74.8017	73.266	62.9138	81.8897
evm.TU.scaffold0001.988	43.7708	51.5831	49.858	54.1104	43.1198	39.1518	130.246	104.845	117.358	114.627	110.114	130.647
evm.TU.scaffold0007.1177	53.6249	52.9995	54.6739	45.1851	31.4595	22.9395	129.482	105.467	107.422	113.198	82.5669	100.987
evm.TU.scaffold0005.877	75.9299	98.7102	90.2571	86.6758	97.0363	94.8186	16.4034	1.90488	15.2049	3.7167	13.2934	28.8637
evm.TU.scaffold0011.965	80.5935	85.5992	88.0277	78.8265	75.6294	94.4259	95.6229	82.1195	72.4716	102.757	69.0307	85.9175
evm.TU.scaffold0007.500	48.4882	50.573	37.8428	60.8753	48.723	36.4709	82.6216	122.135	62.8022	102.227	76.9244	152.169
evm.TU.scaffold0005.1317	40.3931	45.23	44.2128	43.7241	33.3641	29.8545	130.928	133.656	137.79	183.669	98.0734	164.101
evm.TU.scaffold0007.1154	35.9753	37.1024	38.6331	41.8724	33.324	23.9715	78.8595	69.7519	71.2872	67.0273	74.9574	83.0923
evm.TU.scaffold0004.354	47.9273	49.9249	53.6503	57.6162	59.0898	48.5006	71.5037	111.317	77.0438	81.3113	61.4544	87.2806
evm.TU.scaffold0010.1264	31.9786	27.7498	27.8559	49.1264	35.9235	28.4827	177.224	186.766	166.468	153.432	79.3866	166.226
evm.TU.scaffold0012.382	51.7837	48.4381	53.6675	51.1345	42.7459	51.5441	81.0628	96.8417	97.3051	129.823	196.187	93.4855
evm.TU.scaffold0007.202	49.1926	60.3767	48.8303	75.9172	62.0292	64.0223	130.308	90.3255	123.274	109.951	136.832	120.522
evm.TU.scaffold0006.1148	1.59661	1.79621	1.9348	21.35	5.05618	5.53539	148.298	202.616	237.757	264.265	37.7592	191.664
evm.TU.scaffold0002.450	39.1702	52.8804	40.2074	41.1111	17.8855	9.70012	105.884	74.744	131.953	120.643	76.249	134.347
evm.TU.scaffold0002.1646	15.4263	20.7141	19.9382	24.0704	20.3402	12.0525	178.206	157.247	229.535	92.553	175.123	265.854
evm.TU.scaffold0001.303	97.8987	92.7521	91.6881	89.4918	91.3466	106.994	55.1727	77.6744	66.2379	74.029	49.2282	60.1229
evm.TU.scaffold0005.209	79.8417	87.2896	78.1469	107.274	106.143	136.714	50.4412	65.7085	59.113	77.7011	67.6425	65.4621
evm.TU.scaffold0006.1182	8.286	20.9843	7.62863	53.2377	22.666	31.2367	110.844	47.8813	273.421	196.393	89.3393	197.86
evm.TU.scaffold0002.1623	45.8241	38.3838	44.1264	54.1078	45.1603	50.4252	66.5392	83.3657	62.1363	86.1534	72.4588	95.0668
evm.TU.scaffold0004.1122	133.989	125.548	123.052	112.686	123.342	147.83	3.80971	5.6302	10.1679	12.3743	50.1872	6.52935
evm.TU.scaffold0009.1164	76.3893	84.3775	81.6369	65.1986	72.592	68.0598	75.5787	45.1462	83.2033	81.4075	111.183	88.412
evm.TU.scaffold0015.279	58.8646	62.1914	62.9929	55.0726	60.3707	52.4119	77.0614	79.6628	70.13	61.1871	76.2571	74.0636
evm.TU.scaffold0008.885	56.6073	63.4827	56.5001	54.7243	43.5928	29.7726	117.425	165.97	95.8723	112.3	76.7357	103.92
evm.TU.scaffold0002.998	54.9041	48.5668	56.3351	64.0551	67.345	72.8789	104.973	83.7938	132.906	112.277	146.694	107.176
evm.TU.scaffold0004.1748	66.2087	75.0879	78.0708	72.5254	76.9587	67.1137	92.957	78.1766	81.4296	72.7376	72.9355	79.0643
evm.TU.scaffold0007.1988	46.8662	44.9896	47.7112	46.2415	41.4063	34.2252	128.197	99.3998	107.358	120.649	81.9177	123.895
evm.TU.scaffold0003.452	26.037	28.1406	23.1038	26.4392	25.1633	19.1103	119.148	236.632	134.971	160.342	82.1977	153.73
evm.TU.scaffold0014.572	44.8068	49.7654	45.1322	51.3232	41.0333	28.8495	121.806	137.471	96.0461	113.21	75.0295	98.7758
evm.TU.scaffold0011.165	64.7642	62.8082	72.051	54.1672	49.0742	60.3005	83.3985	104.367	97.0936	93.1999	73.7081	83.0421
evm.TU.scaffold0010.1423	74.1088	66.3783	73.9546	63.2404	63.18	61.9503	79.7523	68.7176	68.6494	71.0815	68.4483	75.0808
evm.TU.scaffold0002.1945	38.4169	36.511	38.2755	39.8914	37.0979	30.9286	78.4384	135.593	139.745	236.785	64.9897	262.424
evm.TU.scaffold0002.609	77.5501	71.8798	74.1529	72.013	97.3017	97.6637	54.7775	73.1618	60.4929	72.9754	65.7886	69.6857
evm.TU.scaffold0013.788	104.193	78.3788	46.6784	71.308	84.7262	57.9415	27.2296	31.7827	50.0924	37.5681	37.5271	29.4445
evm.TU.scaffold0005.1938	62.2924	48.4737	55.7222	25.8185	19.9425	24.4612	60.6777	75.4855	67.0359	78.9033	46.6741	95.6037
evm.TU.scaffold0011.101	38.1	43.3953	36.1366	52.8511	34.3006	26.1726	126.613	98.6458	136.466	139.65	92.6042	124.878
evm.TU.scaffold0008.423	85.4014	79.3635	84.4261	66.7999	74.0446	71.6325	46.7024	47.556	52.3145	43.9857	54.1818	53.6258
evm.TU.scaffold0007.2346	59.7256	52.1584	50.4722	66.3248	72.9748	60.5572	138.247	111.064	113.844	131.927	125.239	88.533
evm.TU.scaffold0001.222	95.5205	121.937	114.294	96.9073	133.942	108.25	31.6314	34.9721	28.4428	32.0148	23.0673	28.558
evm.TU.scaffold0006.593	47.7761	35.817	42.2652	43.2803	36.0596	18.8244	143.263	175.702	117.298	169.947	71.6953	156
evm.TU.scaffold0013.236	63.5408	57.8056	55.6793	62.8758	54.9802	46.7888	85.7692	87.7207	78.7703	100.117	79.967	97.8586
[truncated: 25,441 more rows]
