# Supplementary material for: Comparative transcriptome analysis revealed omnivorous adaptation of the small intestine of Melinae
Source: Research Square preprint supplement (doi:10.21203/rs.3.rs-598218/v1), 2022-04-14
Supplement: Supplementary file 3 [file f2716382d5fc994765dac54d.xlsx]

## Sheet: ABvsTB_all_GOenrich
Table S5 Intersection of GO Term differentially expressed genes in different age groups of two fur colors
Category	GO ID	Description
BP	GO:0002376	immune system process
BP	GO:0006260	DNA replication
BP	GO:0006629	lipid metabolic process
BP	GO:0006928	movement of cell or subcellular component
BP	GO:0006955	immune response
BP	GO:0007018	microtubule-based movement
BP	GO:0007155	cell adhesion
BP	GO:0007156	homophilic cell adhesion via plasma membrane adhesion molecules
BP	GO:0019882	antigen processing and presentation
BP	GO:0022610	biological adhesion
BP	GO:0035556	intracellular signal transduction
BP	GO:0040007	growth
BP	GO:0044255	cellular lipid metabolic process
BP	GO:0048523	negative regulation of cellular process
BP	GO:0051336	regulation of hydrolase activity
BP	GO:0098609	cell-cell adhesion
BP	GO:0098742	cell-cell adhesion via plasma-membrane adhesion molecules
BP	GO:1901700	response to oxygen-containing compound
CC	GO:0005576	extracellular region
CC	GO:0005581	collagen trimer
CC	GO:0005856	cytoskeleton
CC	GO:0005882	intermediate filament
CC	GO:0005886	plasma membrane
CC	GO:0042611	MHC protein complex
CC	GO:0042613	MHC class II protein complex
CC	GO:0044421	extracellular region part
CC	GO:0044430	cytoskeletal part
CC	GO:0044459	plasma membrane part
CC	GO:0045095	keratin filament
CC	GO:0045111	intermediate filament cytoskeleton
CC	GO:0071944	cell periphery
CC	GO:0099080	supramolecular complex
CC	GO:0099081	supramolecular polymer
CC	GO:0099512	supramolecular fiber
CC	GO:0099513	polymeric cytoskeletal fiber
MF	GO:0003774	motor activity
MF	GO:0003777	microtubule motor activity
MF	GO:0004222	metalloendopeptidase activity
MF	GO:0004601	peroxidase activity
MF	GO:0004857	enzyme inhibitor activity
MF	GO:0004866	endopeptidase inhibitor activity
MF	GO:0004867	serine-type endopeptidase inhibitor activity
MF	GO:0004871	signal transducer activity
MF	GO:0004888	transmembrane signaling receptor activity
MF	GO:0004930	G-protein coupled receptor activity
MF	GO:0005044	scavenger receptor activity
MF	GO:0005085	guanyl-nucleotide exchange factor activity
MF	GO:0005102	signaling receptor binding
MF	GO:0005125	cytokine activity
MF	GO:0005201	extracellular matrix structural constituent
MF	GO:0005231	excitatory extracellular ligand-gated ion channel activity
MF	GO:0005506	iron ion binding
MF	GO:0005539	glycosaminoglycan binding
MF	GO:0008017	microtubule binding
MF	GO:0008092	cytoskeletal protein binding
MF	GO:0008146	sulfotransferase activity
MF	GO:0015631	tubulin binding
MF	GO:0016462	pyrophosphatase activity
MF	GO:0016491	oxidoreductase activity
MF	GO:0016782	transferase activity, transferring sulfur-containing groups
MF	GO:0016817	hydrolase activity, acting on acid anhydrides
MF	GO:0016818	hydrolase activity, acting on acid anhydrides, in phosphorus-containing anhydrides
MF	GO:0017111	nucleoside-triphosphatase activity
MF	GO:0030234	enzyme regulator activity
MF	GO:0030246	carbohydrate binding
MF	GO:0030414	peptidase inhibitor activity
MF	GO:0038023	signaling receptor activity
MF	GO:0038024	cargo receptor activity
MF	GO:0060089	molecular transducer activity
MF	GO:0061134	peptidase regulator activity
MF	GO:0061135	endopeptidase regulator activity
MF	GO:0098772	molecular function regulator
MF	GO:0099094	ligand-gated cation channel activity
